# Supplementary material for: Melatonin may increase disease resistance and flavonoid biosynthesis through effects on DNA methylation and gene expression in grape berries
Source: BMC Plant Biol. 2020 May 24;20:231. doi: 10.1186/s12870-020-02445-w (PMC7247213; doi:10.1186/s12870-020-02445-w)
Supplement: Supplementary file 4 — Additional file 4 Table S4 Cross-analysis of DMR-related genes and DEGs. [file 12870_2020_2445_MOESM4_ESM.xls]

## Sheet: Table S4
Table S4 Cross-analysis of DMR-related genes and DEGs
CHR	POS_L	POS_R	P-value	Q-value	coverage_MMT1	numCs_MMT1	coverage_Mck1	numCs_Mck1	Meth_Diff	Case_Meth(%)	Control_Meth(%)	Gene	gene_id	baseMean	baseMean_control_Sample_Con1	baseMean_case_Sample_MT1	foldChange	log2FoldChange	pval	padj	up_down	expression_Sample_Con1	expression_Sample_MT1	ncbi_blast	gene_symbol	description
chr1	865001	866000	0.134	0.868	190	4	148	0	2.11	2.11	0	VIT_201s0011g00990	VIT_201s0011g00990	7.76637	15.5327	0	0	#NAME?	0.0392439	1	Down	0.26884	0	LOC100244008	RPM1; Synonyms=RPS3; At3g07040; F17A9.20	PREDICTED: uncharacterized protein LOC100244008 [Vitis vinifera]
chr1	1581001	1582000	0.25	1	60	0	20	1	-5	0	5	VIT_201s0011g01810	VIT_201s0011g01810	199.05	363.078	35.0228	0.0964608	-3.37391	5.56779e-09	1.6985e-06	Down	15.8585	1.7239	LOC100244000
chr1	3067001	3068000	1	1	20	0	47	1	-2.13	0	2.13	VIT_201s0011g03390	VIT_201s0011g03390	25.4186	44.6566	6.18049	0.1384	-2.85308	0.0242468	0.829767	Down	0.664879	0.104184	LOC100256114	At4g39670 {ECO:0000312|Araport:AT4G39670}; T19P19.60 {ECO:0000312|EMBL:CAA18753.1}	unnamed protein product, partial [Vitis vinifera]
chr1	3209001	3210000	1	1	73	1	11	0	1.37	1.37	0	VIT_201s0011g03540	VIT_201s0011g03540	91.7106	49.5106	133.911	2.70468	1.43546	0.04298	1	Up	1.17824	3.31886	LOC100254184	LBD41; Synonyms=ASL38; At3g02550; F16B3.18	PREDICTED: LOB domain-containing protein 40 [Vitis vinifera]
chr1	3211001	3212000	1	1	30	0	203	2	-0.99	0	0.99	VIT_201s0011g03540	VIT_201s0011g03540	91.7106	49.5106	133.911	2.70468	1.43546	0.04298	1	Up	1.17824	3.31886	LOC100254184	LBD41; Synonyms=ASL38; At3g02550; F16B3.18	PREDICTED: LOB domain-containing protein 40 [Vitis vinifera]
chr1	3655001	3656000	0.316	1	36	1	78	0	2.78	2.78	0	VIT_201s0011g03990	VIT_201s0011g03990	7.76637	15.5327	0	0	#NAME?	0.0392439	1	Down	0.133702	0	LOC100261088	LRK10L-2.6 {ECO:0000303|PubMed:12805585}; Synonyms=GDPDL2 {ECO:0000303|PubMed:21323773}, SNC4 {ECO:0000303|PubMed:20508139}; At1g66980 {ECO:0000312|Araport:AT1G66980}; F1O19.6 {ECO:0000312|EMBL:AAF98210.1}	PREDICTED: probable receptor-like protein kinase At1g67000 [Vitis vinifera]
chr1	4115001	4116000	1	1	73	0	193	1	-0.52	0	0.52	VIT_201s0011g04550	VIT_201s0011g04550	272.523	368.903	176.144	0.477481	-1.06649	0.0204313	0.742479	Down	24.8415	10.9916	LOC100262828		PREDICTED: uncharacterized protein LOC100262828 [Vitis vinifera]
chr1	4194001	4195000	1	1	34	0	108	1	-0.93	0	0.93	VIT_201s0011g04660	VIT_201s0011g04660	8.73717	17.4743	0	0	#NAME?	0.0274209	0.885778	Down	0.762261	0	LOC104881294		PREDICTED: uncharacterized protein LOC104881294 [Vitis vinifera]
chr1	4263001	4264000	1	1	100	1	70	0	1	1	0	VIT_201s0011g04720	VIT_201s0011g04720	268.147	394.143	142.151	0.360659	-1.47129	0.00166548	0.118036	Down	6.15364	2.01505	LOC100244049	LPR1; At1g23010; F19G10.5	unnamed protein product, partial [Vitis vinifera]
chr1	4264001	4265000	0.0938	0.721	21	1	203	0	4.76	4.76	0	VIT_201s0011g04720	VIT_201s0011g04720	268.147	394.143	142.151	0.360659	-1.47129	0.00166548	0.118036	Down	6.15364	2.01505	LOC100244049	LPR1; At1g23010; F19G10.5	unnamed protein product, partial [Vitis vinifera]
chr1	4555001	4556000	0.0754	0.642	123	15	41	1	9.76	12.2	2.44	VIT_201s0011g04900	VIT_201s0011g04900	110.4	179.597	41.2033	0.22942	-2.12394	0.00177648	0.123818	Down	6.08987	1.22365	LOC100247506	SCPL50; At1g15000; T15D22.4, T15D22.7	PREDICTED: serine carboxypeptidase-like 50 [Vitis vinifera]
chr1	4661001	4662000	0.091	0.709	10	2	42	1	17.62	20	2.38	VIT_201s0011g04990	VIT_201s0011g04990	35.5823	66.0142	5.15041	0.0780198	-3.68002	0.00171284	0.12058	Down	1.68119	0.158606	LOC100264459	CPN10; At1g14980; T15D22.2	PREDICTED: 10 kDa chaperonin [Vitis vinifera]
chr1	19530001	19531000	1	1	10	0	66	2	-3.03	0	3.03	VIT_201s0010g02440	VIT_201s0010g02440	115.995	165.035	66.9553	0.405703	-1.30151	0.0440806	1	Down	2.09393	0.809942	LOC100259590	ABCC3; Synonyms=EST2, MRP3; At3g13080; MJG19.3	unnamed protein product, partial [Vitis vinifera]
chr1	19532001	19533000	1	1	30	0	85	2	-2.35	0	2.35	VIT_201s0010g02440	VIT_201s0010g02440	115.995	165.035	66.9553	0.405703	-1.30151	0.0440806	1	Down	2.09393	0.809942	LOC100259590	ABCC3; Synonyms=EST2, MRP3; At3g13080; MJG19.3	unnamed protein product, partial [Vitis vinifera]
chr1	19809001	19810000	1	1	20	0	105	2	-1.9	0	1.9	VIT_201s0010g02770	VIT_201s0010g02770	18.9898	35.9195	2.06016	0.0573551	-4.12394	0.00991865	0.434049	Down	1.08854	0.0386789	LOC100240759	ADK-B; Os11g0312400 {ECO:0000312|EMBL:BAT13742.1}, LOC_Os11g20790 {ECO:0000305}; and OrderedLocusNames=Os11g0312220 {ECO:0000312|EMBL:BAT13739.1}	unnamed protein product, partial [Vitis vinifera]
chr1	19810001	19811000	1	1	41	0	67	1	-1.49	0	1.49	VIT_201s0010g02770	VIT_201s0010g02770	18.9898	35.9195	2.06016	0.0573551	-4.12394	0.00991865	0.434049	Down	1.08854	0.0386789	LOC100240759	ADK-B; Os11g0312400 {ECO:0000312|EMBL:BAT13742.1}, LOC_Os11g20790 {ECO:0000305}; and OrderedLocusNames=Os11g0312220 {ECO:0000312|EMBL:BAT13739.1}	unnamed protein product, partial [Vitis vinifera]
chr1	19816001	19817000	1	1	20	0	65	2	-3.08	0	3.08	VIT_201s0010g02770	VIT_201s0010g02770	18.9898	35.9195	2.06016	0.0573551	-4.12394	0.00991865	0.434049	Down	1.08854	0.0386789	LOC100240759	ADK-B; Os11g0312400 {ECO:0000312|EMBL:BAT13742.1}, LOC_Os11g20790 {ECO:0000305}; and OrderedLocusNames=Os11g0312220 {ECO:0000312|EMBL:BAT13739.1}	unnamed protein product, partial [Vitis vinifera]
chr1	20880001	20881000	1	1	32	1	10	0	3.12	3.12	0	VIT_201s0010g03540	VIT_201s0010g03540	7.21057	0	14.4211	Inf	Inf	0.0445414	1	Up	0	0.137182	LOC100264256	MAP65-8; At1g27920; F13K9.3	unnamed protein product, partial [Vitis vinifera]
chr1	20882001	20883000	1	1	127	1	54	0	0.79	0.79	0	VIT_201s0010g03540	VIT_201s0010g03540	7.21057	0	14.4211	Inf	Inf	0.0445414	1	Up	0	0.137182	LOC100264256	MAP65-8; At1g27920; F13K9.3	unnamed protein product, partial [Vitis vinifera]
chr1	21034001	21035000	1	1	76	0	276	2	-0.72	0	0.72	VIT_201s0010g03680	VIT_201s0010g03680	124.188	183.481	64.8952	0.35369	-1.49944	0.0178479	0.669663	Down	6.62598	2.19183	LOC100253955	At1g27930 {ECO:0000312|EMBL:AEE30892.1}; F13K9.4 {ECO:0000312|EMBL:AAG51480.1}	PREDICTED: glucuronoxylan 4-O-methyltransferase 1 [Vitis vinifera]
chr1	21462001	21463000	1	1	135	1	116	0	0.74	0.74	0	VIT_201s0010g03930	VIT_201s0010g03930	478.366	695.09	261.641	0.376413	-1.40961	0.000206971	0.0204793	Down	28.2724	10.0872	LOC100254080	WRKY75; At5g13080; T19L5.40	PREDICTED: probable WRKY transcription factor 75 [Vitis vinifera]
chr1	22328001	22329000	1	1	21	0	51	1	-1.96	0	1.96	VIT_201s0146g00480	VIT_201s0146g00480	22.9026	42.7151	3.09025	0.0723456	-3.78895	0.00791484	0.367877	Down	0.697793	0.138218	LOC100262641	TIFY9; Synonyms=JAS1, JAZ10; At5g13220; T31B5.40	PREDICTED: protein TIFY 9 [Vitis vinifera]
chr2	154001	155000	0.149	0.907	55	0	35	2	-5.71	0	5.71	VIT_202s0234g00120	VIT_202s0234g00120	35.6379	13.5912	57.6846	4.24427	2.08552	0.0469777	1	Up	0.096752	0.737376	LOC100241435	CSN7; Synonyms=FUS5; At1g02090; T7I23.24, T7I23.25	unnamed protein product, partial [Vitis vinifera]
chr2	156001	157000	1	1	10	0	33	1	-3.03	0	3.03	VIT_202s0234g00120	VIT_202s0234g00120	35.6379	13.5912	57.6846	4.24427	2.08552	0.0469777	1	Up	0.096752	0.737376	LOC100241435	CSN7; Synonyms=FUS5; At1g02090; T7I23.24, T7I23.25	unnamed protein product, partial [Vitis vinifera]
chr2	174001	175000	1	1	33	1	20	0	3.03	3.03	0	VIT_202s0234g00120	VIT_202s0234g00120	35.6379	13.5912	57.6846	4.24427	2.08552	0.0469777	1	Up	0.096752	0.737376	LOC100241435	CSN7; Synonyms=FUS5; At1g02090; T7I23.24, T7I23.25	unnamed protein product, partial [Vitis vinifera]
chr2	1229001	1230000	1	1	314	3	33	0	0.96	0.96	0	VIT_202s0025g01280	VIT_202s0025g01280	47.7172	90.2841	5.15041	0.0570467	-4.13171	0.000134029	0.0144676	Down	1.00107	0.0575919	LOC100253577	WRKY53; At4g23810; F9D16.280	PREDICTED: probable WRKY transcription factor 41 [Vitis vinifera]
chr2	1230001	1231000	0.438	1	72	0	56	1	-1.79	0	1.79	VIT_202s0025g01280	VIT_202s0025g01280	47.7172	90.2841	5.15041	0.0570467	-4.13171	0.000134029	0.0144676	Down	1.00107	0.0575919	LOC100253577	WRKY53; At4g23810; F9D16.280	PREDICTED: probable WRKY transcription factor 41 [Vitis vinifera]
chr2	1455001	1456000	1	1	80	1	35	0	1.25	1.25	0	VIT_202s0025g01500	VIT_202s0025g01500	66.7849	106.788	26.7821	0.250798	-1.9954	0.014894	0.584896	Down	1.29882	0.139315	LOC100263310	NDK4; Synonyms=NDPKIII	hypothetical protein CISIN_1g026399mg [Citrus sinensis]
chr2	3147001	3148000	0.0181	0.279	60	0	77	7	-9.09	0	9.09	VIT_202s0025g03610	VIT_202s0025g03610	47.821	19.4159	76.2261	3.92595	1.97304	0.0338075	1	Up	0.149408	0.55227	LOC100264973	FTIP1 {ECO:0000303|PubMed:22529749}; At5g06850 {ECO:0000312|Araport:AT5G06850}; MOJ9.2 {ECO:0000312|EMBL:BAB11143.1}	PREDICTED: uncharacterized protein LOC100264973 [Vitis vinifera]
chr2	3148001	3149000	1	1	109	1	20	0	0.92	0.92	0	VIT_202s0025g03610	VIT_202s0025g03610	47.821	19.4159	76.2261	3.92595	1.97304	0.0338075	1	Up	0.149408	0.55227	LOC100264973	FTIP1 {ECO:0000303|PubMed:22529749}; At5g06850 {ECO:0000312|Araport:AT5G06850}; MOJ9.2 {ECO:0000312|EMBL:BAB11143.1}	PREDICTED: uncharacterized protein LOC100264973 [Vitis vinifera]
chr2	3151001	3152000	0.35	1	89	0	48	1	-2.08	0	2.08	VIT_202s0025g03610	VIT_202s0025g03610	47.821	19.4159	76.2261	3.92595	1.97304	0.0338075	1	Up	0.149408	0.55227	LOC100264973	FTIP1 {ECO:0000303|PubMed:22529749}; At5g06850 {ECO:0000312|Araport:AT5G06850}; MOJ9.2 {ECO:0000312|EMBL:BAB11143.1}	PREDICTED: uncharacterized protein LOC100264973 [Vitis vinifera]
chr2	3152001	3153000	1	1	21	0	152	1	-0.66	0	0.66	VIT_202s0025g03610	VIT_202s0025g03610	47.821	19.4159	76.2261	3.92595	1.97304	0.0338075	1	Up	0.149408	0.55227	LOC100264973	FTIP1 {ECO:0000303|PubMed:22529749}; At5g06850 {ECO:0000312|Araport:AT5G06850}; MOJ9.2 {ECO:0000312|EMBL:BAB11143.1}	PREDICTED: uncharacterized protein LOC100264973 [Vitis vinifera]
chr2	3654001	3655000	1	1	69	1	41	0	1.45	1.45	0	VIT_202s0025g04130	VIT_202s0025g04130	160.018	258.232	61.8049	0.239339	-2.06287	0.000427094	0.037458	Down	6.61549	1.65127	LOC100241085	RBL2 {ECO:0000303|PubMed:16223493, ECO:0000303|PubMed:17181860}; At1g63120 {ECO:0000312|Araport:AT1G63120}; F16M19.4 {ECO:0000312|EMBL:AAG51610.1}	PREDICTED: inactive rhomboid protein 1 [Vitis vinifera]
chr2	3655001	3656000	0.235	1	31	1	101	0	3.23	3.23	0	VIT_202s0025g04130	VIT_202s0025g04130	160.018	258.232	61.8049	0.239339	-2.06287	0.000427094	0.037458	Down	6.61549	1.65127	LOC100241085	RBL2 {ECO:0000303|PubMed:16223493, ECO:0000303|PubMed:17181860}; At1g63120 {ECO:0000312|Araport:AT1G63120}; F16M19.4 {ECO:0000312|EMBL:AAG51610.1}	PREDICTED: inactive rhomboid protein 1 [Vitis vinifera]
chr2	3775001	3776000	0.426	1	20	1	27	0	5	5	0	VIT_202s0025g04250	VIT_202s0025g04250	18.4451	36.8903	0	0	#NAME?	0.00103355	0.0793983	Down	1.84232	0	LOC100249610	tlp	PREDICTED: protein P21-like [Vitis vinifera]
chr2	3980001	3981000	1	1	64	1	30	0	1.56	1.56	0	VIT_202s0025g04490	VIT_202s0025g04490	56.4433	91.2549	21.6317	0.237047	-2.07675	0.0180196	0.674902	Down	1.45173	0.111307	LOC100256411	UTR4; At1g12600; F5O11.33, T12C24.13	hypothetical protein CISIN_1g018484mg [Citrus sinensis]
chr2	3981001	3982000	1	1	84	3	23	0	3.57	3.57	0	VIT_202s0025g04490	VIT_202s0025g04490	56.4433	91.2549	21.6317	0.237047	-2.07675	0.0180196	0.674902	Down	1.45173	0.111307	LOC100256411	UTR4; At1g12600; F5O11.33, T12C24.13	hypothetical protein CISIN_1g018484mg [Citrus sinensis]
chr2	4578001	4579000	1	1	11	0	80	2	-2.5	0	2.5	VIT_202s0025g05110	VIT_202s0025g05110	106.706	47.569	165.843	3.48637	1.80173	0.0078383	0.366641	Up	1.51054	4.71499	LOC100251249	DTX56 {ECO:0000303|PubMed:11739388}; Synonyms=RHC1 {ECO:0000303|PubMed:25599916}; At4g22790 {ECO:0000312|Araport:AT4G22790}; T12H17.180 {ECO:0000312|EMBL:CAA16564.1}	PREDICTED: MATE efflux family protein 5 [Vitis vinifera]
chr2	6407001	6408000	0.521	1	62	0	97	2	-2.06	0	2.06	VIT_202s0012g00550	VIT_202s0012g00550	150.944	234.933	66.9553	0.284998	-1.81098	0.0022514	0.145815	Down	1.93932	0.469472	LOC100267737	IP5P2 {ECO:0000303|PubMed:11340187}; Synonyms=5P2 {ECO:0000303|Ref.3}; At4g18010 {ECO:0000312|Araport:AT4G18010}; T6K21.190 {ECO:0000312|EMBL:CAA17144.1}	PREDICTED: type I inositol 1,4,5-trisphosphate 5-phosphatase 2 isoform X2 [Vitis vinifera]
chr2	6705001	6706000	0.499	1	167	2	164	0	1.2	1.2	0	VIT_202s0012g00830	VIT_202s0012g00830	34.6115	64.0726	5.15041	0.080384	-3.63695	0.00210395	0.138864	Down	0.853601	0.162367	LOC100262694	EXLB1; Synonyms=EXPR1; Os07g0496250, LOC_Os07g31390; OJ1457_D07.118, OsJ_023376	PREDICTED: expansin-like B1 [Vitis vinifera]
chr2	7151001	7152000	0.000661	0.0285	71	0	51	8	-15.69	0	15.69	VIT_202s0012g01140	VIT_202s0012g01140	152.756	91.2549	214.257	2.3479	1.23137	0.0331903	0.989551	Up	1.79776	3.90745	LOC100264404	At4g35230; F23E12.210	PREDICTED: probable serine/threonine-protein kinase At4g35230 [Vitis vinifera]
chr2	7156001	7157000	0.509	1	21	0	31	2	-6.45	0	6.45	VIT_202s0012g01140	VIT_202s0012g01140	152.756	91.2549	214.257	2.3479	1.23137	0.0331903	0.989551	Up	1.79776	3.90745	LOC100264404	At4g35230; F23E12.210	PREDICTED: probable serine/threonine-protein kinase At4g35230 [Vitis vinifera]
chr2	8574001	8575000	0.333	1	20	1	40	0	5	5	0	VIT_202s0012g01960	VIT_202s0012g01960	29.2721	53.3938	5.15041	0.0964608	-3.37391	0.00655094	0.325983	Down	0.762334	0.0786515	LOC100266131	JMJ706; Os10g0577600, LOC_Os10g42690; OSJNBa0035H01.2	PREDICTED: lysine-specific demethylase JMJ706 isoform X1 [Vitis vinifera]
chr2	8575001	8576000	0.0458	0.485	42	8	20	0	19.05	19.05	0	VIT_202s0012g01960	VIT_202s0012g01960	29.2721	53.3938	5.15041	0.0964608	-3.37391	0.00655094	0.325983	Down	0.762334	0.0786515	LOC100266131	JMJ706; Os10g0577600, LOC_Os10g42690; OSJNBa0035H01.2	PREDICTED: lysine-specific demethylase JMJ706 isoform X1 [Vitis vinifera]
chr2	8579001	8580000	2.91e-10	1.44e-07	84	1	111	39	-33.94	1.19	35.14	VIT_202s0012g01960	VIT_202s0012g01960	29.2721	53.3938	5.15041	0.0964608	-3.37391	0.00655094	0.325983	Down	0.762334	0.0786515	LOC100266131	JMJ706; Os10g0577600, LOC_Os10g42690; OSJNBa0035H01.2	PREDICTED: lysine-specific demethylase JMJ706 isoform X1 [Vitis vinifera]
chr2	8582001	8583000	1	1	51	0	136	1	-0.74	0	0.74	VIT_202s0012g01960	VIT_202s0012g01960	29.2721	53.3938	5.15041	0.0964608	-3.37391	0.00655094	0.325983	Down	0.762334	0.0786515	LOC100266131	JMJ706; Os10g0577600, LOC_Os10g42690; OSJNBa0035H01.2	PREDICTED: lysine-specific demethylase JMJ706 isoform X1 [Vitis vinifera]
chr2	8583001	8584000	0.553	1	75	0	155	3	-1.94	0	1.94	VIT_202s0012g01960	VIT_202s0012g01960	29.2721	53.3938	5.15041	0.0964608	-3.37391	0.00655094	0.325983	Down	0.762334	0.0786515	LOC100266131	JMJ706; Os10g0577600, LOC_Os10g42690; OSJNBa0035H01.2	PREDICTED: lysine-specific demethylase JMJ706 isoform X1 [Vitis vinifera]
chr2	16900001	16901000	1	1	248	1	98	0	0.4	0.4	0	VIT_202s0033g01380	VIT_202s0033g01380	171.353	308.713	33.9927	0.110111	-3.18297	1.54747e-07	3.46519e-05	Down	7.65316	0.784024	LOC100247765	AOX3; Synonyms=AOX1D; At1g32350; F27G20_12, F5D14.11	PREDICTED: ubiquinol oxidase 2, mitochondrial [Vitis vinifera]
chr2	18248001	18249000	0.459	1	72	1	85	0	1.39	1.39	0	VIT_202s0087g00710	VIT_202s0087g00710	127.437	195.13	59.7447	0.306179	-1.70755	0.00682474	0.331764	Down	2.80049	0.745078	HYD2	CYP707A1; At4g19230; T18B16.200	hypodontia, autosomal recessive (2) [Vitis vinifera]
chr2	18249001	18250000	0.516	1	141	0	206	2	-0.97	0	0.97	VIT_202s0087g00710	VIT_202s0087g00710	127.437	195.13	59.7447	0.306179	-1.70755	0.00682474	0.331764	Down	2.80049	0.745078	HYD2	CYP707A1; At4g19230; T18B16.200	hypodontia, autosomal recessive (2) [Vitis vinifera]
chr2	18250001	18251000	1	1	20	0	30	1	-3.33	0	3.33	VIT_202s0087g00710	VIT_202s0087g00710	127.437	195.13	59.7447	0.306179	-1.70755	0.00682474	0.331764	Down	2.80049	0.745078	HYD2	CYP707A1; At4g19230; T18B16.200	hypodontia, autosomal recessive (2) [Vitis vinifera]
chr2	18252001	18253000	0.34	1	66	9	12	0	13.64	13.64	0	VIT_202s0087g00710	VIT_202s0087g00710	127.437	195.13	59.7447	0.306179	-1.70755	0.00682474	0.331764	Down	2.80049	0.745078	HYD2	CYP707A1; At4g19230; T18B16.200	hypodontia, autosomal recessive (2) [Vitis vinifera]
chr2	18750001	18751000	0.329	1	529	0	259	1	-0.39	0	0.39	VIT_202s0087g01010	VIT_202s0087g01010	302.196	476.661	127.73	0.267968	-1.89986	2.9169e-05	0.00393576	Down	16.059	3.06939	LOC104877547	CRK25; At4g05200; C17L7.120, C6L9.3	unnamed protein product, partial [Vitis vinifera]
chr3	403001	404000	0.0973	0.734	20	2	43	0	10	10	0	VIT_203s0038g00430	VIT_203s0038g00430	69.3712	123.291	15.4512	0.125323	-2.99628	0.000453326	0.03943	Down	2.8229	0.322768	LOC100265746	DTX46 {ECO:0000303|PubMed:11739388}; Synonyms=EDS5H {ECO:0000303|PubMed:26055508}; At2g21340 {ECO:0000312|Araport:AT2G21340}; F3K23.10 {ECO:0000312|EMBL:AAD23682.2}	unnamed protein product, partial [Vitis vinifera]
chr3	404001	405000	0.293	1	123	0	51	1	-1.96	0	1.96	VIT_203s0038g00430	VIT_203s0038g00430	69.3712	123.291	15.4512	0.125323	-2.99628	0.000453326	0.03943	Down	2.8229	0.322768	LOC100265746	DTX46 {ECO:0000303|PubMed:11739388}; Synonyms=EDS5H {ECO:0000303|PubMed:26055508}; At2g21340 {ECO:0000312|Araport:AT2G21340}; F3K23.10 {ECO:0000312|EMBL:AAD23682.2}	unnamed protein product, partial [Vitis vinifera]
chr3	1660001	1661000	0.0803	0.666	95	2	239	0	2.11	2.11	0	VIT_203s0038g02390	VIT_203s0038g02390	167.307	103.875	230.738	2.2213	1.15141	0.0386206	1	Up	7.78063	16.853	LOC100248604	UBC28; Synonyms=UBC9A; At1g64230; F22C12.2	PREDICTED: ubiquitin-conjugating enzyme E2 28 [Vitis vinifera]
chr3	1742001	1743000	1	1	66	2	10	0	3.03	3.03	0	VIT_203s0038g02490	VIT_203s0038g02490	62.2384	103.875	20.6016	0.198331	-2.33402	0.00641871	0.32016	Down	3.81017	0.716914	LOC100257179	SKP1A; Synonyms=ASK1, SKP1, UIP1; At1g75950; T4O12.17	PREDICTED: SKP1-like protein 1A isoform X4 [Vitis vinifera]
chr3	2342001	2343000	0.477	1	21	1	23	0	4.76	4.76	0	VIT_203s0038g03220	VIT_203s0038g03220	496.651	855.272	138.031	0.161388	-2.63139	2.76253e-11	1.32155e-08	Down	15.0746	2.57405	LOC100257272	LYM2; At2g17120; F6P23.25	hypothetical protein VITISV_025519 [Vitis vinifera]
chr3	2460001	2461000	1	1	20	0	41	2	-4.88	0	4.88	VIT_203s0038g03400	VIT_203s0038g03400	91.2215	132.999	49.4439	0.371761	-1.42755	0.0449004	1	Down	3.84492	1.3478	LOC100232985	CHIT1B	RecName: Full=Basic endochitinase; Flags: Precursor
chr3	2461001	2462000	1	1	32	0	267	8	-3	0	3	VIT_203s0038g03400	VIT_203s0038g03400	91.2215	132.999	49.4439	0.371761	-1.42755	0.0449004	1	Down	3.84492	1.3478	LOC100232985	CHIT1B	RecName: Full=Basic endochitinase; Flags: Precursor
chr3	2462001	2463000	1	1	149	1	74	0	0.67	0.67	0	VIT_203s0038g03400	VIT_203s0038g03400	91.2215	132.999	49.4439	0.371761	-1.42755	0.0449004	1	Down	3.84492	1.3478	LOC100232985	CHIT1B	RecName: Full=Basic endochitinase; Flags: Precursor
chr3	2463001	2464000	0.158	0.931	189	4	122	0	2.12	2.12	0	VIT_203s0038g03400	VIT_203s0038g03400	91.2215	132.999	49.4439	0.371761	-1.42755	0.0449004	1	Down	3.84492	1.3478	LOC100232985	CHIT1B	RecName: Full=Basic endochitinase; Flags: Precursor
chr3	2466001	2467000	0.499	1	209	2	197	0	0.96	0.96	0	VIT_203s0038g03410	VIT_203s0038g03410	112.242	169.889	54.5943	0.321352	-1.63777	0.0133132	0.537868	Down	4.22207	1.33985	LOC100241839	NAC035 {ECO:0000312|EMBL:AEC05581.1}; At2g02450 {ECO:0000312|Araport:AT2G02450}	PREDICTED: putative NAC domain-containing protein 94 [Vitis vinifera]
chr3	2545001	2546000	1	1	30	0	186	1	-0.54	0	0.54	VIT_203s0038g03530	VIT_203s0038g03530	654.554	896.045	413.063	0.460984	-1.11721	0.00109135	0.0824261	Down	14.3283	6.02465	LOC100248706	AATL1; At1g47670; F16N3.4	PREDICTED: lysine histidine transporter-like 8 [Vitis vinifera]
chr3	4010001	4011000	0.565	1	40	4	11	0	10	10	0	VIT_203s0063g00430	VIT_203s0063g00430	12.1646	23.2991	1.03008	0.0442112	-4.49944	0.0282126	0.901134	Down	1.44506	0	LOC100245165	AMY1.1	unnamed protein product, partial [Vitis vinifera]
chr3	4068001	4069000	1	1	11	0	82	2	-2.44	0	2.44	VIT_203s0063g00550	VIT_203s0063g00550	30.6097	60.1894	1.03008	0.017114	-5.86868	0.000155137	0.0164095	Down	3.73377	0.0685199	LOC100253696	CNR1	unnamed protein product, partial [Vitis vinifera]
chr3	4208001	4209000	1	1	53	1	31	0	1.89	1.89	0	VIT_203s0063g00670	VIT_203s0063g00670	7.21057	0	14.4211	Inf	Inf	0.0445414	1	Up	0	0.374102	LOC100250434	KRP7; Synonyms=ICK5; At1g49620; F14J22.14	unnamed protein product, partial [Vitis vinifera]
chr3	5265001	5266000	1	1	232	2	10	0	0.86	0.86	0	VIT_203s0063g01970	VIT_203s0063g01970	176.5	258.232	94.7675	0.366986	-1.4462	0.0085592	0.38912	Down	6.00338	2.67029		HB1; Synonyms=GLB1	unnamed protein product, partial [Vitis vinifera]
chr3	6853001	6854000	0.478	1	95	0	87	1	-1.15	0	1.15	VIT_203s0091g00480	VIT_203s0091g00480	316.139	441.712	190.565	0.431424	-1.21282	0.00548142	0.284885	Down	9.95798	3.93252	LOC100249808	RHY1A {ECO:0000303|PubMed:9781696}; At1g49850 {ECO:0000312|Araport:AT1G49850}; F10F5.8 {ECO:0000312|EMBL:AAG51778.1}	PREDICTED: uncharacterized protein LOC100249808 isoform X1 [Vitis vinifera]
chr3	7126001	7127000	1	1	11	0	173	1	-0.58	0	0.58	VIT_203s0091g00690	VIT_203s0091g00690	75.8481	113.583	38.113	0.335552	-1.57539	0.0401111	1	Down	3.58755	1.12084	LOC100258264	ZAT10; Synonyms=STZ; At1g27730; T22C5.18	hypothetical protein VITISV_013668 [Vitis vinifera]
chr3	11276001	11277000	0.436	1	34	1	44	0	2.94	2.94	0	VIT_203s0097g00700	VIT_203s0097g00700	3607.85	2058.09	5157.62	2.50602	1.3254	9.76915e-08	2.25968e-05	Up	164.128	395.463	LOC100242451		PREDICTED: basic form of pathogenesis-related protein 1 [Vitis vinifera]
chr4	397001	398000	1.87e-13	2.33e-10	107	56	112	9	44.3	52.34	8.04	VIT_204s0008g00440	VIT_204s0008g00440	183.04	297.064	69.0155	0.232326	-2.10578	0.000153926	0.0163636	Down	4.06998	0.920036	LOC104878975	RLK5; Synonyms=HAE; At4g28490; F21O9.180	PREDICTED: receptor-like protein kinase HSL1 [Vitis vinifera]
chr4	689001	690000	1	1	10	0	63	1	-1.59	0	1.59	VIT_204s0008g00790	VIT_204s0008g00790	318.833	437.829	199.836	0.456424	-1.13155	0.00920028	0.412914	Down	16.4647	7.43962	LOC100245594	RPL28A; At2g19730; F6F22.24	PREDICTED: 60S ribosomal protein L28-1 isoform X2 [Vitis vinifera]
chr4	942001	943000	1	1	124	2	57	0	1.61	1.61	0	VIT_204s0008g01140	VIT_204s0008g01140	8.73717	17.4743	0	0	#NAME?	0.0274209	0.885778	Down	0.312547	0	LOC100262911	CWINV1; Synonyms=BFRUCT1; At3g13790; MMM17.26	PREDICTED: beta-fructofuranosidase, insoluble isoenzyme CWINV1 isoform X3 [Vitis vinifera]
chr4	943001	944000	0.314	1	20	1	97	1	3.97	5	1.03	VIT_204s0008g01140	VIT_204s0008g01140	8.73717	17.4743	0	0	#NAME?	0.0274209	0.885778	Down	0.312547	0	LOC100262911	CWINV1; Synonyms=BFRUCT1; At3g13790; MMM17.26	PREDICTED: beta-fructofuranosidase, insoluble isoenzyme CWINV1 isoform X3 [Vitis vinifera]
chr4	945001	946000	1	1	11	0	56	1	-1.79	0	1.79	VIT_204s0008g01140	VIT_204s0008g01140	8.73717	17.4743	0	0	#NAME?	0.0274209	0.885778	Down	0.312547	0	LOC100262911	CWINV1; Synonyms=BFRUCT1; At3g13790; MMM17.26	PREDICTED: beta-fructofuranosidase, insoluble isoenzyme CWINV1 isoform X3 [Vitis vinifera]
chr4	1473001	1474000	1	1	80	1	21	0	1.25	1.25	0	VIT_204s0008g01850	VIT_204s0008g01850	145.586	241.728	49.4439	0.204543	-2.28952	0.000194889	0.0198175	Down	2.03308	0.39378	LOC100256096	GT-2; At1g76890; F7O12.6	PREDICTED: trihelix transcription factor GTL1-like [Vitis vinifera]
chr4	1474001	1475000	1	1	184	1	21	0	0.54	0.54	0	VIT_204s0008g01850	VIT_204s0008g01850	145.586	241.728	49.4439	0.204543	-2.28952	0.000194889	0.0198175	Down	2.03308	0.39378	LOC100256096	GT-2; At1g76890; F7O12.6	PREDICTED: trihelix transcription factor GTL1-like [Vitis vinifera]
chr4	1690001	1691000	1	1	49	1	10	0	2.04	2.04	0	VIT_204s0008g02070	VIT_204s0008g02070	51.4707	85.4301	17.5114	0.204979	-2.28645	0.0129302	0.525422	Down	1.40837	0.31225	LOC100262822	RIPK {ECO:0000303|PubMed:21320696}; Synonyms=PBL14 {ECO:0000303|PubMed:20413097}, PIX8 {ECO:0000303|PubMed:23951354}; At2g05940 {ECO:0000312|Araport:AT2G05940}	PREDICTED: serine/threonine-protein kinase At5g01020 [Vitis vinifera]
chr4	2405001	2406000	1	1	127	1	120	0	0.79	0.79	0	VIT_204s0008g02920	VIT_204s0008g02920	322.679	210.663	434.695	2.06346	1.04507	0.0154009	0.600321	Up	2.83591	5.60153	LOC100250706	PUB34; At2g19410; F27F23.21	hypothetical protein VITISV_023046 [Vitis vinifera]
chr4	2408001	2409000	1	1	88	0	221	2	-0.9	0	0.9	VIT_204s0008g02920	VIT_204s0008g02920	322.679	210.663	434.695	2.06346	1.04507	0.0154009	0.600321	Up	2.83591	5.60153	LOC100250706	PUB34; At2g19410; F27F23.21	hypothetical protein VITISV_023046 [Vitis vinifera]
chr4	2890001	2891000	0.408	1	142	0	98	1	-1.02	0	1.02	VIT_204s0008g03530	VIT_204s0008g03530	91.6699	168.919	14.4211	0.0853733	-3.55007	8.43416e-06	0.00130537	Down	2.38556	0.213978	LOC100244024	NPR4 {ECO:0000303|PubMed:17309686}; Os01g0837000 {ECO:0000312|EMBL:BAS75114.1}, LOC_Os01g61990 {ECO:0000305}; P0506B12.37 {ECO:0000312|EMBL:BAD73402.1}	PREDICTED: ankyrin repeat-containing protein At5g02620-like [Vitis vinifera]
chr4	4580001	4581000	0.0184	0.282	25	9	12	0	36	36	0	VIT_204s0008g05100	VIT_204s0008g05100	71.4202	106.788	36.0529	0.337613	-1.56656	0.0460509	1	Down	3.70968	1.06103	LOC100244002	COX5B-2; At1g80230; F18B13.29	unnamed protein product, partial [Vitis vinifera]
chr4	4582001	4583000	0.335	1	141	0	71	1	-1.41	0	1.41	VIT_204s0008g05100	VIT_204s0008g05100	71.4202	106.788	36.0529	0.337613	-1.56656	0.0460509	1	Down	3.70968	1.06103	LOC100244002	COX5B-2; At1g80230; F18B13.29	unnamed protein product, partial [Vitis vinifera]
chr4	4583001	4584000	1	1	14	0	136	1	-0.74	0	0.74	VIT_204s0008g05100	VIT_204s0008g05100	71.4202	106.788	36.0529	0.337613	-1.56656	0.0460509	1	Down	3.70968	1.06103	LOC100244002	COX5B-2; At1g80230; F18B13.29	unnamed protein product, partial [Vitis vinifera]
chr4	7264001	7265000	0.0346	0.411	45	3	91	0	6.67	6.67	0	VIT_204s0008g07130	VIT_204s0008g07130	11.6496	23.2991	0	0	#NAME?	0.00968566	0.426946	Down	0.434701	0	LOC100252630	At5g10770 {ECO:0000312|Araport:AT5G10770}; T30N20_40 {ECO:0000312|EMBL:CAB96832.1}	PREDICTED: aspartic proteinase CDR1-like [Vitis vinifera]
chr4	7499001	7500000	1	1	22	0	26	1	-3.85	0	3.85	VIT_204s0008g07250	VIT_204s0008g07250	108.529	190.276	26.7821	0.140754	-2.82875	6.92742e-05	0.00823815	Down	7.06294	0.59598	LOC100265510	At5g10770 {ECO:0000312|Araport:AT5G10770}; T30N20_40 {ECO:0000312|EMBL:CAB96832.1}	PREDICTED: protein ASPARTIC PROTEASE IN GUARD CELL 2-like isoform X1 [Vitis vinifera]
chr4	7500001	7501000	5.3e-05	0.00416	23	14	62	9	46.35	60.87	14.52	VIT_204s0008g07250	VIT_204s0008g07250	108.529	190.276	26.7821	0.140754	-2.82875	6.92742e-05	0.00823815	Down	7.06294	0.59598	LOC100265510	At5g10770 {ECO:0000312|Araport:AT5G10770}; T30N20_40 {ECO:0000312|EMBL:CAB96832.1}	PREDICTED: protein ASPARTIC PROTEASE IN GUARD CELL 2-like isoform X1 [Vitis vinifera]
chr4	9458001	9459000	0.497	1	83	0	84	2	-2.38	0	2.38	VIT_204s0069g01010	VIT_204s0069g01010	412.933	797.024	28.8423	0.0361875	-4.78837	6.66896e-23	1.16979e-19	Down	28.371	0.96827	LOC100244374		PREDICTED: protein YLS9 [Vitis vinifera]
chr4	16767001	16768000	0.534	1	137	0	236	2	-0.85	0	0.85	VIT_204s0023g00530	VIT_204s0023g00530	10.3008	0	20.6016	Inf	Inf	0.0140087	0.556358	Up	0	2.73692	LOC100252964	SAUR23 {ECO:0000303|PubMed:12036261}; At5g18060 {ECO:0000312|Araport:AT5G18060}; MCM23.16 {ECO:0000312|EMBL:BAB08405.1}	hypothetical protein VITISV_035059 [Vitis vinifera]
chr4	17238001	17239000	1	1	20	0	66	1	-1.52	0	1.52	VIT_204s0023g00830	VIT_204s0023g00830	1277.91	1886.26	669.553	0.354964	-1.49426	2.72394e-07	5.73361e-05	Down	26.4412	8.30612	LOC100265011	CRT3; At1g08450; T27G7.13	unnamed protein product, partial [Vitis vinifera]
chr4	17239001	17240000	1	1	31	0	63	1	-1.59	0	1.59	VIT_204s0023g00830	VIT_204s0023g00830	1277.91	1886.26	669.553	0.354964	-1.49426	2.72394e-07	5.73361e-05	Down	26.4412	8.30612	LOC100265011	CRT3; At1g08450; T27G7.13	unnamed protein product, partial [Vitis vinifera]
chr4	18297001	18298000	1	1	31	0	85	2	-2.35	0	2.35	VIT_204s0023g01720	VIT_204s0023g01720	93.441	144.649	42.2334	0.291972	-1.7761	0.0128356	0.522587	Down	1.66681	0.538351	LOC100244435	SPCC23B6.04c	PREDICTED: random slug protein 5 isoform X3 [Vitis vinifera]
chr4	20906001	20907000	0.552	1	93	0	184	2	-1.09	0	1.09	VIT_204s0044g00220	VIT_204s0044g00220	333.902	635.872	31.9325	0.0502185	-4.31564	1.61234e-17	1.69691e-14	Down	11.4856	0.666886	LOC100257537		PREDICTED: zeaxanthin epoxidase, chloroplastic isoform X1 [Vitis vinifera]
chr4	20912001	20913000	1	1	42	0	48	1	-2.08	0	2.08	VIT_204s0044g00220	VIT_204s0044g00220	333.902	635.872	31.9325	0.0502185	-4.31564	1.61234e-17	1.69691e-14	Down	11.4856	0.666886	LOC100257537		PREDICTED: zeaxanthin epoxidase, chloroplastic isoform X1 [Vitis vinifera]
chr4	20914001	20915000	1	1	76	2	10	0	2.63	2.63	0	VIT_204s0044g00220	VIT_204s0044g00220	333.902	635.872	31.9325	0.0502185	-4.31564	1.61234e-17	1.69691e-14	Down	11.4856	0.666886	LOC100257537		PREDICTED: zeaxanthin epoxidase, chloroplastic isoform X1 [Vitis vinifera]
chr4	21609001	21610000	0.481	1	139	0	129	1	-0.78	0	0.78	VIT_204s0044g00660	VIT_204s0044g00660	20.0495	34.9487	5.15041	0.147371	-2.76248	0.0472828	1	Down	0.600287	0.102931	LOC100264417	LECRK4 {ECO:0000303|PubMed:25485617}; Os04g0202800 {ECO:0000312|EMBL:BAF14142.2}, LOC_Os04g12600 {ECO:0000305}; OsJ_13808 {ECO:0000312|EMBL:EAZ29749.1}, OSJNBb0005B05.8 {ECO:0000312|EMBL:CAE03341.2}	PREDICTED: G-type lectin S-receptor-like serine/threonine-protein kinase RLK1 [Vitis vinifera]
chr4	21845001	21846000	1	1	66	0	70	1	-1.43	0	1.43	VIT_204s0044g00730	VIT_204s0044g00730	93.5892	139.795	47.3838	0.338953	-1.56084	0.0274371	0.885778	Down	2.56164	0.834527	LOC100262539	LECRK3 {ECO:0000303|PubMed:25485617}; H0512B01.11 {ECO:0000312|EMBL:CAH67716.1}, OsI_14844 {ECO:0000312|EMBL:EAY93045.1}, OSIGBa0147O06.1 {ECO:0000312|EMBL:CAH66271.1}	PREDICTED: G-type lectin S-receptor-like serine/threonine-protein kinase RLK1 isoform X1 [Vitis vinifera]
chr4	21847001	21848000	0.0469	0.491	32	2	114	0	6.25	6.25	0	VIT_204s0044g00730	VIT_204s0044g00730	93.5892	139.795	47.3838	0.338953	-1.56084	0.0274371	0.885778	Down	2.56164	0.834527	LOC100262539	LECRK3 {ECO:0000303|PubMed:25485617}; H0512B01.11 {ECO:0000312|EMBL:CAH67716.1}, OsI_14844 {ECO:0000312|EMBL:EAY93045.1}, OSIGBa0147O06.1 {ECO:0000312|EMBL:CAH66271.1}	PREDICTED: G-type lectin S-receptor-like serine/threonine-protein kinase RLK1 isoform X1 [Vitis vinifera]
chr4	21848001	21849000	0.411	1	123	0	86	1	-1.16	0	1.16	VIT_204s0044g00730	VIT_204s0044g00730	93.5892	139.795	47.3838	0.338953	-1.56084	0.0274371	0.885778	Down	2.56164	0.834527	LOC100262539	LECRK3 {ECO:0000303|PubMed:25485617}; H0512B01.11 {ECO:0000312|EMBL:CAH67716.1}, OsI_14844 {ECO:0000312|EMBL:EAY93045.1}, OSIGBa0147O06.1 {ECO:0000312|EMBL:CAH66271.1}	PREDICTED: G-type lectin S-receptor-like serine/threonine-protein kinase RLK1 isoform X1 [Vitis vinifera]
chr4	21849001	21850000	1	1	10	0	146	1	-0.68	0	0.68	VIT_204s0044g00730	VIT_204s0044g00730	93.5892	139.795	47.3838	0.338953	-1.56084	0.0274371	0.885778	Down	2.56164	0.834527	LOC100262539	LECRK3 {ECO:0000303|PubMed:25485617}; H0512B01.11 {ECO:0000312|EMBL:CAH67716.1}, OsI_14844 {ECO:0000312|EMBL:EAY93045.1}, OSIGBa0147O06.1 {ECO:0000312|EMBL:CAH66271.1}	PREDICTED: G-type lectin S-receptor-like serine/threonine-protein kinase RLK1 isoform X1 [Vitis vinifera]
chr4	21864001	21865000	1	1	127	2	30	0	1.57	1.57	0	VIT_204s0044g00750	VIT_204s0044g00750	71.4314	123.291	19.5716	0.158743	-2.65524	0.00131977	0.0964575	Down	3.29253	0.530593	LOC100267699	LECRK3 {ECO:0000303|PubMed:25485617}; H0512B01.11 {ECO:0000312|EMBL:CAH67716.1}, OsI_14844 {ECO:0000312|EMBL:EAY93045.1}, OSIGBa0147O06.1 {ECO:0000312|EMBL:CAH66271.1}	PREDICTED: G-type lectin S-receptor-like serine/threonine-protein kinase RLK1 isoform X1 [Vitis vinifera]
chr4	22947001	22948000	1	1	170	1	55	0	0.59	0.59	0	VIT_204s0044g01420	VIT_204s0044g01420	12.65	24.2699	1.03008	0.0424427	-4.55834	0.0243253	0.829767	Down	0.531876	0.025091	LOC100252291	GSVIVT00026920001, LOC100243180	unnamed protein product, partial [Vitis vinifera]
chr4	22948001	22949000	1	1	186	1	10	0	0.54	0.54	0	VIT_204s0044g01420	VIT_204s0044g01420	12.65	24.2699	1.03008	0.0424427	-4.55834	0.0243253	0.829767	Down	0.531876	0.025091	LOC100252291	GSVIVT00026920001, LOC100243180	unnamed protein product, partial [Vitis vinifera]
chr4	22949001	22950000	1	1	41	1	20	0	2.44	2.44	0	VIT_204s0044g01420	VIT_204s0044g01420	12.65	24.2699	1.03008	0.0424427	-4.55834	0.0243253	0.829767	Down	0.531876	0.025091	LOC100252291	GSVIVT00026920001, LOC100243180	unnamed protein product, partial [Vitis vinifera]
chr5	1239001	1240000	1	1	91	0	197	1	-0.51	0	0.51	VIT_205s0077g01540	VIT_205s0077g01540	721.728	1310.58	132.881	0.101391	-3.302	1.83787e-19	2.27561e-16	Down	59.2207	5.87261	LOC100251668	PRUA1	PREDICTED: major allergen Pru av 1-like [Vitis vinifera]
chr5	1240001	1241000	1.54e-11	1.13e-08	22	14	108	2	61.78	63.64	1.85	VIT_205s0077g01540	VIT_205s0077g01540	721.728	1310.58	132.881	0.101391	-3.302	1.83787e-19	2.27561e-16	Down	59.2207	5.87261	LOC100251668	PRUA1	PREDICTED: major allergen Pru av 1-like [Vitis vinifera]
chr5	1244001	1245000	1	1	10	0	145	3	-2.07	0	2.07	VIT_205s0077g01550	VIT_205s0077g01550	697.658	1289.22	106.098	0.0822967	-3.60302	1.06323e-21	1.59856e-18	Down	82.4217	4.79522	LOC100256795	PRUA1	PREDICTED: major allergen Pru av 1 [Vitis vinifera]
chr5	1249001	1250000	0.569	1	22	0	61	4	-6.56	0	6.56	VIT_205s0077g01560	VIT_205s0077g01560	473.478	905.753	41.2033	0.0454906	-4.45829	5.49273e-23	1.05106e-19	Down	43.8235	1.87047	LOC100261887	PRUA1	PREDICTED: major allergen Pru av 1 [Vitis vinifera]
chr5	1249001	1250000	0.569	1	22	0	61	4	-6.56	0	6.56	VIT_205s0077g01570	VIT_205s0077g01570	4676.95	8168.28	1185.62	0.14515	-2.78439	3.31221e-27	1.16198e-23	Down	141.712	19.4364	LOC100244758	PRUA1	PREDICTED: uncharacterized protein LOC8278794 [Ricinus communis]
chr5	1250001	1251000	1	1	50	1	50	0	2	2	0	VIT_205s0077g01570	VIT_205s0077g01570	4676.95	8168.28	1185.62	0.14515	-2.78439	3.31221e-27	1.16198e-23	Down	141.712	19.4364	LOC100244758	PRUA1	PREDICTED: uncharacterized protein LOC8278794 [Ricinus communis]
chr5	2350001	2351000	1	1	32	1	32	0	3.12	3.12	0	VIT_205s0020g00440	VIT_205s0020g00440	143.255	199.984	86.5269	0.432669	-1.20867	0.0416956	1	Down	2.62895	0.983015	LOC100252933	BOR2; At3g62270; T17J13.230	PREDICTED: uncharacterized protein LOC100252933 isoform X1 [Vitis vinifera]
chr5	2352001	2353000	1	1	144	1	105	0	0.69	0.69	0	VIT_205s0020g00440	VIT_205s0020g00440	143.255	199.984	86.5269	0.432669	-1.20867	0.0416956	1	Down	2.62895	0.983015	LOC100252933	BOR2; At3g62270; T17J13.230	PREDICTED: uncharacterized protein LOC100252933 isoform X1 [Vitis vinifera]
chr5	2845001	2846000	1	1	109	1	108	0	0.92	0.92	0	VIT_205s0020g01070	VIT_205s0020g01070	10.8159	0	21.6317	Inf	Inf	0.0116207	0.479615	Up	0	0.284624	LOC100244346	IAA31; At3g17600; MKP6.16	hypothetical protein VITISV_026538 [Vitis vinifera]
chr5	3930001	3931000	1	1	30	1	30	0	3.33	3.33	0	VIT_205s0020g02200	VIT_205s0020g02200	515.889	764.988	266.791	0.348752	-1.51973	4.41056e-05	0.00573074	Down	6.23153	1.53567	LOC100263026		PREDICTED: uncharacterized protein LOC100263026 [Vitis vinifera]
chr5	4935001	4936000	0.569	1	147	3	52	0	2.04	2.04	0	VIT_205s0020g03170	VIT_205s0020g03170	183.988	265.998	101.978	0.383379	-1.38316	0.0104369	0.449256	Down	2.86256	1.03631	LOC100251097	LOX1.5; Synonyms=POTLX-3	PREDICTED: probable linoleate 9S-lipoxygenase 5 [Vitis vinifera]
chr5	4936001	4937000	0.375	1	40	0	24	1	-4.17	0	4.17	VIT_205s0020g03170	VIT_205s0020g03170	183.988	265.998	101.978	0.383379	-1.38316	0.0104369	0.449256	Down	2.86256	1.03631	LOC100251097	LOX1.5; Synonyms=POTLX-3	PREDICTED: probable linoleate 9S-lipoxygenase 5 [Vitis vinifera]
chr5	4937001	4938000	0.509	1	138	2	102	0	1.45	1.45	0	VIT_205s0020g03170	VIT_205s0020g03170	183.988	265.998	101.978	0.383379	-1.38316	0.0104369	0.449256	Down	2.86256	1.03631	LOC100251097	LOX1.5; Synonyms=POTLX-3	PREDICTED: probable linoleate 9S-lipoxygenase 5 [Vitis vinifera]
chr5	4938001	4939000	1	1	152	1	40	0	0.66	0.66	0	VIT_205s0020g03170	VIT_205s0020g03170	183.988	265.998	101.978	0.383379	-1.38316	0.0104369	0.449256	Down	2.86256	1.03631	LOC100251097	LOX1.5; Synonyms=POTLX-3	PREDICTED: probable linoleate 9S-lipoxygenase 5 [Vitis vinifera]
chr5	4978001	4979000	0.54	1	10	0	20	2	-10	0	10	VIT_205s0020g03220	VIT_205s0020g03220	35.1265	64.0726	6.18049	0.0964608	-3.37391	0.00337314	0.198542	Down	2.64978	0.329904	LOC100263125	LECRK1 {ECO:0000303|PubMed:25485617}; Synonyms=LECRK {ECO:0000303|PubMed:24033867}; OsI_14840 {ECO:0000312|EMBL:EAY93041.1}	PREDICTED: G-type lectin S-receptor-like serine/threonine-protein kinase RLK1 [Vitis vinifera]
chr5	4979001	4980000	1	1	10	0	10	1	-10	0	10	VIT_205s0020g03220	VIT_205s0020g03220	35.1265	64.0726	6.18049	0.0964608	-3.37391	0.00337314	0.198542	Down	2.64978	0.329904	LOC100263125	LECRK1 {ECO:0000303|PubMed:25485617}; Synonyms=LECRK {ECO:0000303|PubMed:24033867}; OsI_14840 {ECO:0000312|EMBL:EAY93041.1}	PREDICTED: G-type lectin S-receptor-like serine/threonine-protein kinase RLK1 [Vitis vinifera]
chr5	5001001	5002000	0.281	1	61	1	340	1	1.35	1.64	0.29	VIT_205s0020g03240	VIT_205s0020g03240	57.1177	102.904	11.3309	0.110111	-3.18297	0.000652967	0.0535665	Down	1.69017	0.194562	LOC100263125	LECRK4 {ECO:0000303|PubMed:25485617}; Os04g0202800 {ECO:0000312|EMBL:BAF14142.2}, LOC_Os04g12600 {ECO:0000305}; OsJ_13808 {ECO:0000312|EMBL:EAZ29749.1}, OSJNBb0005B05.8 {ECO:0000312|EMBL:CAE03341.2}	PREDICTED: G-type lectin S-receptor-like serine/threonine-protein kinase RLK1 [Vitis vinifera]
chr5	5049001	5050000	1	1	102	1	79	0	0.98	0.98	0	VIT_205s0020g03270	VIT_205s0020g03270	291.747	481.515	101.978	0.211786	-2.23932	1.67457e-06	0.000291305	Down	7.17336	1.46168	LOC100254587	LECRK4 {ECO:0000303|PubMed:25485617}; Os04g0202800 {ECO:0000312|EMBL:BAF14142.2}, LOC_Os04g12600 {ECO:0000305}; OsJ_13808 {ECO:0000312|EMBL:EAZ29749.1}, OSJNBb0005B05.8 {ECO:0000312|EMBL:CAE03341.2}	PREDICTED: G-type lectin S-receptor-like serine/threonine-protein kinase RLK1 [Vitis vinifera]
chr5	5055001	5056000	1	1	112	2	40	0	1.79	1.79	0	VIT_205s0020g03280	VIT_205s0020g03280	1172.46	1729.96	614.959	0.355476	-1.49218	4.69053e-07	9.31424e-05	Down	30.7689	10.5532	LOC100244323		PREDICTED: primary amine oxidase [Vitis vinifera]
chr5	5056001	5057000	0.486	1	76	0	72	1	-1.39	0	1.39	VIT_205s0020g03280	VIT_205s0020g03280	1172.46	1729.96	614.959	0.355476	-1.49218	4.69053e-07	9.31424e-05	Down	30.7689	10.5532	LOC100244323		PREDICTED: primary amine oxidase [Vitis vinifera]
chr5	5057001	5058000	0.577	1	109	4	30	0	3.67	3.67	0	VIT_205s0020g03280	VIT_205s0020g03280	1172.46	1729.96	614.959	0.355476	-1.49218	4.69053e-07	9.31424e-05	Down	30.7689	10.5532	LOC100244323		PREDICTED: primary amine oxidase [Vitis vinifera]
chr5	5058001	5059000	0.289	1	59	1	145	0	1.69	1.69	0	VIT_205s0020g03280	VIT_205s0020g03280	1172.46	1729.96	614.959	0.355476	-1.49218	4.69053e-07	9.31424e-05	Down	30.7689	10.5532	LOC100244323		PREDICTED: primary amine oxidase [Vitis vinifera]
chr5	5060001	5061000	0.114	0.796	574	1	540	5	-0.75	0.17	0.93	VIT_205s0020g03290	VIT_205s0020g03290	20.4164	39.8027	1.03008	0.0258797	-5.27203	0.00251173	0.156883	Down	1.09157	0.0301006	LOC109122557	LECRK3 {ECO:0000303|PubMed:25485617}; H0512B01.11 {ECO:0000312|EMBL:CAH67716.1}, OsI_14844 {ECO:0000312|EMBL:EAY93045.1}, OSIGBa0147O06.1 {ECO:0000312|EMBL:CAH66271.1}	PREDICTED: G-type lectin S-receptor-like serine/threonine-protein kinase RLK1 [Vitis vinifera]
chr5	5399001	5400000	1	1	220	1	10	0	0.45	0.45	0	VIT_205s0020g03690	VIT_205s0020g03690	331.583	475.69	187.475	0.394111	-1.34333	0.00181362	0.124938	Down	30.2605	10.9483	LOC100240811	p20	PREDICTED: uncharacterized protein YIR042C [Vitis vinifera]
chr5	5401001	5402000	1	1	20	0	22	1	-4.55	0	4.55	VIT_205s0020g03690	VIT_205s0020g03690	331.583	475.69	187.475	0.394111	-1.34333	0.00181362	0.124938	Down	30.2605	10.9483	LOC100240811	p20	PREDICTED: uncharacterized protein YIR042C [Vitis vinifera]
chr5	5402001	5403000	0.108	0.773	83	0	10	1	-10	0	10	VIT_205s0020g03690	VIT_205s0020g03690	331.583	475.69	187.475	0.394111	-1.34333	0.00181362	0.124938	Down	30.2605	10.9483	LOC100240811	p20	PREDICTED: uncharacterized protein YIR042C [Vitis vinifera]
chr5	5957001	5958000	0.0949	0.725	766	5	952	1	0.55	0.65	0.11	VIT_205s0020g04260	VIT_205s0020g04260	23.2991	46.5982	0	0	#NAME?	0.000233382	0.0225343	Down	0.583521	0	LOC100240964	ACA13; At3g22910; F5N5.8	PREDICTED: putative calcium-transporting ATPase 13, plasma membrane-type [Vitis vinifera]
chr5	6004001	6005000	0.286	1	184	3	116	0	1.63	1.63	0	VIT_205s0020g04280	VIT_205s0020g04280	55.9987	105.817	6.18049	0.0584075	-4.0977	5.07407e-05	0.00623522	Down	1.28403	0.0744116	LOC100242476	ACA13; At3g22910; F5N5.8	PREDICTED: putative calcium-transporting ATPase 13, plasma membrane-type [Vitis vinifera]
chr5	6005001	6006000	1	1	118	1	76	0	0.85	0.85	0	VIT_205s0020g04280	VIT_205s0020g04280	55.9987	105.817	6.18049	0.0584075	-4.0977	5.07407e-05	0.00623522	Down	1.28403	0.0744116	LOC100242476	ACA13; At3g22910; F5N5.8	PREDICTED: putative calcium-transporting ATPase 13, plasma membrane-type [Vitis vinifera]
chr5	6028001	6029000	1	1	52	0	130	1	-0.77	0	0.77	VIT_205s0020g04300	VIT_205s0020g04300	9.22257	18.4451	0	0	#NAME?	0.0229701	0.801819	Down	0.237533	0.0117856	LOC100259585	ACA13; At3g22910; F5N5.8	PREDICTED: putative calcium-transporting ATPase 13, plasma membrane-type [Vitis vinifera]
chr5	6034001	6035000	1	1	62	0	134	1	-0.75	0	0.75	VIT_205s0020g04300	VIT_205s0020g04300	9.22257	18.4451	0	0	#NAME?	0.0229701	0.801819	Down	0.237533	0.0117856	LOC100259585	ACA13; At3g22910; F5N5.8	PREDICTED: putative calcium-transporting ATPase 13, plasma membrane-type [Vitis vinifera]
chr5	6217001	6218000	0.43	1	40	1	53	0	2.5	2.5	0	VIT_205s0020g04420	VIT_205s0020g04420	47.3801	84.4593	10.3008	0.121962	-3.0355	0.0022845	0.147504	Down	1.94027	0.184571	LOC100244152	CAM3; Os01g0279300, LOC_Os01g17190; OsJ_001265, OsJ_01307 {ECO:0000312|EMBL:EEE54334.1}, P0003H10.4	PREDICTED: calmodulin-like protein 11 [Vitis vinifera]
chr5	6373001	6374000	0.573	1	41	4	10	0	9.76	9.76	0	VIT_205s0020g04560	VIT_205s0020g04560	93.1335	137.853	48.4138	0.351199	-1.50964	0.0329681	0.984319	Down	1.98741	0.554722	LOC100252782	PUB44; Synonyms=SAUL1; At1g20780; F2D10.27	PREDICTED: U-box domain-containing protein 43-like [Vitis vinifera]
chr5	7603001	7604000	1	1	30	1	11	0	3.33	3.33	0	VIT_205s0049g00550	VIT_205s0049g00550	1744.93	2379.42	1110.43	0.46668	-1.0995	4.86581e-05	0.00612087	Down	82.4834	36.8612	LOC100240909		PREDICTED: early nodulin-75-like [Vitis vinifera]
chr5	7779001	7780000	0.149	0.909	66	2	104	0	3.03	3.03	0	VIT_205s0049g00740	VIT_205s0049g00740	1731.53	2379.42	1083.65	0.455424	-1.13472	2.8758e-05	0.0039307	Down	52.1466	19.1664	LOC100247822		PREDICTED: repetitive proline-rich cell wall protein 2-like [Vitis vinifera]
chr5	7798001	7799000	1	1	178	1	43	0	0.56	0.56	0	VIT_205s0049g00780	VIT_205s0049g00780	2072.6	3084.22	1060.98	0.344004	-1.5395	7.46102e-09	2.15133e-06	Down	50.0997	17.0482	LOC100244140		PREDICTED: early nodulin-75-like isoform X1 [Vitis vinifera]
chr5	7805001	7806000	0.575	1	189	4	60	0	2.12	2.12	0	VIT_205s0049g00790	VIT_205s0049g00790	146.853	233.962	59.7447	0.255361	-1.96939	0.00109671	0.0824261	Down	6.67264	1.74829	LOC100261279		hypothetical protein VITISV_041242 [Vitis vinifera]
chr5	7853001	7854000	1	1	173	1	168	0	0.58	0.58	0	VIT_205s0049g00840	VIT_205s0049g00840	6488.46	10981.7	1995.27	0.181691	-2.46044	1.01161e-22	1.63795e-19	Down	84.8508	29.223	LOC100249526		PREDICTED: early nodulin-75-like [Vitis vinifera]
chr5	7854001	7855000	0.407	1	80	0	55	1	-1.82	0	1.82	VIT_205s0049g00840	VIT_205s0049g00840	6488.46	10981.7	1995.27	0.181691	-2.46044	1.01161e-22	1.63795e-19	Down	84.8508	29.223	LOC100249526		PREDICTED: early nodulin-75-like [Vitis vinifera]
chr5	9181001	9182000	0.204	1	144	8	40	0	5.56	5.56	0	VIT_205s0049g01740	VIT_205s0049g01740	8.24066	0	16.4813	Inf	Inf	0.0300913	0.93697	Up	0	0.049433	LOC104879302	ARPC2B; At2g33385; F4P9.42	PREDICTED: uncharacterized protein LOC104879302 [Vitis vinifera]
chr5	9185001	9186000	0.423	1	63	1	86	0	1.59	1.59	0	VIT_205s0049g01740	VIT_205s0049g01740	8.24066	0	16.4813	Inf	Inf	0.0300913	0.93697	Up	0	0.049433	LOC104879302	ARPC2B; At2g33385; F4P9.42	PREDICTED: uncharacterized protein LOC104879302 [Vitis vinifera]
chr5	9186001	9187000	1	1	30	0	119	1	-0.84	0	0.84	VIT_205s0049g01740	VIT_205s0049g01740	8.24066	0	16.4813	Inf	Inf	0.0300913	0.93697	Up	0	0.049433	LOC104879302	ARPC2B; At2g33385; F4P9.42	PREDICTED: uncharacterized protein LOC104879302 [Vitis vinifera]
chr5	20722001	20723000	0.27	1	30	1	81	0	3.33	3.33	0	VIT_205s0124g00240	VIT_205s0124g00240	86.5565	133.97	39.1431	0.292178	-1.77508	0.015721	0.607679	Down	4.39409	1.04926	LOC100246361	BHLH128; Synonyms=EN74; At1g05805; T20M3.7	unnamed protein product, partial [Vitis vinifera]
chr5	20727001	20728000	0.385	1	88	0	55	1	-1.82	0	1.82	VIT_205s0124g00240	VIT_205s0124g00240	86.5565	133.97	39.1431	0.292178	-1.77508	0.015721	0.607679	Down	4.39409	1.04926	LOC100246361	BHLH128; Synonyms=EN74; At1g05805; T20M3.7	unnamed protein product, partial [Vitis vinifera]
chr5	20728001	20729000	0.447	1	168	1	208	0	0.6	0.6	0	VIT_205s0124g00240	VIT_205s0124g00240	86.5565	133.97	39.1431	0.292178	-1.77508	0.015721	0.607679	Down	4.39409	1.04926	LOC100246361	BHLH128; Synonyms=EN74; At1g05805; T20M3.7	unnamed protein product, partial [Vitis vinifera]
chr5	22057001	22058000	0.202	1	31	1	35	5	-11.06	3.23	14.29	VIT_205s0102g00190	VIT_205s0102g00190	59	108.729	9.27074	0.0852644	-3.55191	0.000177561	0.018321	Down	2.07574	0.293485
chr5	23515001	23516000	1	1	86	2	10	0	2.33	2.33	0	VIT_205s0094g00160	VIT_205s0094g00160	7.76637	15.5327	0	0	#NAME?	0.0392439	1	Down	1.95186	0	LOC100250774		hypothetical protein VITISV_012616 [Vitis vinifera]
chr5	23516001	23517000	0.548	1	59	2	30	0	3.39	3.39	0	VIT_205s0094g00160	VIT_205s0094g00160	7.76637	15.5327	0	0	#NAME?	0.0392439	1	Down	1.95186	0	LOC100250774		hypothetical protein VITISV_012616 [Vitis vinifera]
chr6	772001	773000	0.483	1	182	1	195	0	0.55	0.55	0	VIT_206s0004g00620	VIT_206s0004g00620	298.827	199.013	398.642	2.00309	1.00223	0.0238006	0.822624	Up	3.32655	4.85419	LOC100241560	PTC52; Synonyms=ACD1-like, TIC55-IV; At4g25650; L73G19.30	PREDICTED: protochlorophyllide-dependent translocon component 52, chloroplastic-like [Vitis vinifera]
chr6	1137001	1138000	2.56e-05	0.00239	258	163	11	0	63.18	63.18	0	VIT_206s0004g01020	VIT_206s0004g01020	444.162	786.345	101.978	0.129686	-2.9469	1.65933e-12	9.43979e-10	Down	44.3549	5.64168	LOC100263839	DIR7; At3g13650; MMM17.4	PREDICTED: dirigent protein 7 [Vitis vinifera]
chr6	1137001	1138000	2.56e-05	0.00239	258	163	11	0	63.18	63.18	0	VIT_206s0004g01030	VIT_206s0004g01030	89.4319	174.743	4.12033	0.0235793	-5.40634	9.94266e-09	2.75372e-06	Down	23.8293	0.665257	LOC100241568	DIR7; At3g13650; MMM17.4	PREDICTED: dirigent protein 22 [Vitis vinifera]
chr6	2070001	2071000	0.2	1	10	1	40	0	10	10	0	VIT_206s0004g01670	VIT_206s0004g01670	23.9327	42.7151	5.15041	0.120576	-3.05199	0.0205394	0.742479	Down	1.28435	0.151208	LOC100260304	UGT92A1; At5g12890; T24H18.60	PREDICTED: UDP-glycosyltransferase 92A1 [Vitis vinifera]
chr6	2430001	2431000	0.5	1	110	2	96	0	1.82	1.82	0	VIT_206s0004g01990	VIT_206s0004g01990	414.916	816.44	13.3911	0.0164018	-5.93	1.12372e-28	1.18266e-24	Down	3.75894	0	LOC104879582		PREDICTED: extensin-like [Vitis vinifera]
chr6	2432001	2433000	1	1	10	0	35	1	-2.86	0	2.86	VIT_206s0004g01990	VIT_206s0004g01990	414.916	816.44	13.3911	0.0164018	-5.93	1.12372e-28	1.18266e-24	Down	3.75894	0	LOC104879582		PREDICTED: extensin-like [Vitis vinifera]
chr6	3233001	3234000	1	1	54	1	31	0	1.85	1.85	0	VIT_206s0004g02620	VIT_206s0004g02620	108.162	50.4814	165.843	3.28523	1.716	0.0106485	0.456347	Up	0.674453	1.98227	LOC100241575	PAL	PREDICTED: phenylalanine ammonia-lyase [Vitis vinifera]
chr6	3234001	3235000	1	1	10	0	61	1	-1.64	0	1.64	VIT_206s0004g02620	VIT_206s0004g02620	108.162	50.4814	165.843	3.28523	1.716	0.0106485	0.456347	Up	0.674453	1.98227	LOC100241575	PAL	PREDICTED: phenylalanine ammonia-lyase [Vitis vinifera]
chr6	4583001	4584000	1	1	146	2	46	0	1.37	1.37	0	VIT_206s0004g03620	VIT_206s0004g03620	602.05	895.074	309.025	0.34525	-1.53429	1.53313e-05	0.00218047	Down	19.8536	7.32451	LOC100251947	NTF6	PREDICTED: mitogen-activated protein kinase homolog NTF6 [Vitis vinifera]
chr6	4584001	4585000	1	1	80	1	23	0	1.25	1.25	0	VIT_206s0004g03620	VIT_206s0004g03620	602.05	895.074	309.025	0.34525	-1.53429	1.53313e-05	0.00218047	Down	19.8536	7.32451	LOC100251947	NTF6	PREDICTED: mitogen-activated protein kinase homolog NTF6 [Vitis vinifera]
chr6	4585001	4586000	1	1	101	2	45	0	1.98	1.98	0	VIT_206s0004g03620	VIT_206s0004g03620	602.05	895.074	309.025	0.34525	-1.53429	1.53313e-05	0.00218047	Down	19.8536	7.32451	LOC100251947	NTF6	PREDICTED: mitogen-activated protein kinase homolog NTF6 [Vitis vinifera]
chr6	6215001	6216000	1	1	11	0	34	1	-2.94	0	2.94	VIT_206s0004g05340	VIT_206s0004g05340	43.1449	3.88319	82.4066	21.2214	4.40745	0.000122855	0.0137552	Up	0.130783	3.48293	LOC100262098	At2g29260 {ECO:0000312|Araport:AT2G29260}; F16P2.36 {ECO:0000312|EMBL:AAC95209.1}	hypothetical protein VITISV_016038 [Vitis vinifera]
chr6	6493001	6494000	1	1	32	0	104	2	-1.92	0	1.92	VIT_206s0004g05700	VIT_206s0004g05700	10.1934	20.3867	0	0	#NAME?	0.0161887	0.620685	Down	0.542927	0	LOC100244980	GSTU8; At3g09270; F3L24.14	unnamed protein product, partial [Vitis vinifera]
chr6	6526001	6527000	1	1	108	1	98	0	0.93	0.93	0	VIT_206s0004g05780	VIT_206s0004g05780	370.133	495.106	245.159	0.495165	-1.01402	0.0135161	0.541965	Down	10.9645	5.06783	LOC100267375	UGT76A2; Synonyms=UGT7	PREDICTED: UDP-glucose iridoid glucosyltransferase-like [Vitis vinifera]
chr6	6884001	6885000	0.368	1	103	0	60	1	-1.67	0	1.67	VIT_206s0004g06090	VIT_206s0004g06090	14.8473	2.91239	26.7821	9.19593	3.201	0.0499209	1	Up	0	0.496593	LOC100267265	LAC22; Os11g0708100, LOC_Os11g48060; OsJ_033548	PREDICTED: laccase-4 [Vitis vinifera]
chr6	6886001	6887000	0.17	0.959	53	2	75	0	3.77	3.77	0	VIT_206s0004g06090	VIT_206s0004g06090	14.8473	2.91239	26.7821	9.19593	3.201	0.0499209	1	Up	0	0.496593	LOC100267265	LAC22; Os11g0708100, LOC_Os11g48060; OsJ_033548	PREDICTED: laccase-4 [Vitis vinifera]
chr6	7527001	7528000	1	1	80	1	53	0	1.25	1.25	0	VIT_206s0004g06830	VIT_206s0004g06830	2304.76	1097.97	3511.55	3.19822	1.67727	1.8931e-10	7.70155e-08	Up	18.3804	59.156	LOC100241610	ASN1; Synonyms=DIN6; At3g47340; T21L8.90	unnamed protein product, partial [Vitis vinifera]
chr6	7528001	7529000	0.156	0.928	53	2	158	1	3.14	3.77	0.63	VIT_206s0004g06830	VIT_206s0004g06830	2304.76	1097.97	3511.55	3.19822	1.67727	1.8931e-10	7.70155e-08	Up	18.3804	59.156	LOC100241610	ASN1; Synonyms=DIN6; At3g47340; T21L8.90	unnamed protein product, partial [Vitis vinifera]
chr6	7529001	7530000	1	1	10	0	168	1	-0.6	0	0.6	VIT_206s0004g06830	VIT_206s0004g06830	2304.76	1097.97	3511.55	3.19822	1.67727	1.8931e-10	7.70155e-08	Up	18.3804	59.156	LOC100241610	ASN1; Synonyms=DIN6; At3g47340; T21L8.90	unnamed protein product, partial [Vitis vinifera]
chr6	16563001	16564000	0.26	1	71	3	53	0	4.23	4.23	0	VIT_206s0009g03360	VIT_206s0009g03360	75.7592	116.496	35.0228	0.300636	-1.73391	0.0247417	0.833678	Down	3.48136	0.970385	LOC100250010	HPAT3 {ECO:0000303|PubMed:24036508}; At5g13500 {ECO:0000312|Araport:AT5G13500}; T6I14.30 {ECO:0000312|EMBL:CAC05427.1}	PREDICTED: uncharacterized protein LOC100250010 [Vitis vinifera]
chr6	16566001	16567000	1	1	91	1	10	0	1.1	1.1	0	VIT_206s0009g03360	VIT_206s0009g03360	75.7592	116.496	35.0228	0.300636	-1.73391	0.0247417	0.833678	Down	3.48136	0.970385	LOC100250010	HPAT3 {ECO:0000303|PubMed:24036508}; At5g13500 {ECO:0000312|Araport:AT5G13500}; T6I14.30 {ECO:0000312|EMBL:CAC05427.1}	PREDICTED: uncharacterized protein LOC100250010 [Vitis vinifera]
chr6	17325001	17326000	1	1	113	1	108	0	0.88	0.88	0	VIT_206s0061g00100	VIT_206s0061g00100	328.763	652.375	5.15041	0.00789486	-6.98487	1.52813e-27	6.4331e-24	Down	23.8037	0.178549	LOC100265368	VIT_06s0061g00120	PREDICTED: glucan endo-1,3-beta-glucosidase-like [Vitis vinifera]
chr6	17328001	17329000	1	1	249	1	136	0	0.4	0.4	0	VIT_206s0061g00100	VIT_206s0061g00100	328.763	652.375	5.15041	0.00789486	-6.98487	1.52813e-27	6.4331e-24	Down	23.8037	0.178549	LOC100265368	VIT_06s0061g00120	PREDICTED: glucan endo-1,3-beta-glucosidase-like [Vitis vinifera]
chr6	20239001	20240000	1	1	86	0	178	1	-0.56	0	0.56	VIT_206s0080g00320	VIT_206s0080g00320	142.444	209.692	75.196	0.358602	-1.47954	0.0135609	0.541965	Down	6.17632	2.05225	LOC100248360		PREDICTED: uncharacterized protein LOC100248360 [Vitis vinifera]
chr6	21180001	21181000	1	1	20	0	58	1	-1.72	0	1.72	VIT_206s0080g01076	VIT_206s0080g01076	19.0491	33.9779	4.12033	0.121265	-3.04376	0.0362016	1	Down	0.496099	0	LOC100241706		PREDICTED: uncharacterized protein LOC100241706 [Vitis vinifera]
chr7	519001	520000	1	1	10	0	91	2	-2.2	0	2.2	VIT_207s0141g00890	VIT_207s0141g00890	123.884	227.166	20.6016	0.0906896	-3.46292	8.60226e-07	0.000160238	Down	5.11361	0.432215	LOC100264774	CYP94A1; Synonyms=VAGH111	PREDICTED: cytochrome P450 94A1 [Vitis vinifera]
chr7	1977001	1978000	1	1	104	0	131	1	-0.76	0	0.76	VIT_207s0104g00830	VIT_207s0104g00830	366.557	494.135	238.979	0.483631	-1.04802	0.0110195	0.462973	Down	15.5728	5.71361	LOC100263109	At2g48020; T9J23.17	PREDICTED: sugar transporter ERD6-like 7 [Vitis vinifera]
chr7	1979001	1980000	1	1	80	1	79	0	1.25	1.25	0	VIT_207s0104g00830	VIT_207s0104g00830	366.557	494.135	238.979	0.483631	-1.04802	0.0110195	0.462973	Down	15.5728	5.71361	LOC100263109	At2g48020; T9J23.17	PREDICTED: sugar transporter ERD6-like 7 [Vitis vinifera]
chr7	1980001	1981000	1	1	195	1	81	0	0.51	0.51	0	VIT_207s0104g00830	VIT_207s0104g00830	366.557	494.135	238.979	0.483631	-1.04802	0.0110195	0.462973	Down	15.5728	5.71361	LOC100263109	At2g48020; T9J23.17	PREDICTED: sugar transporter ERD6-like 7 [Vitis vinifera]
chr7	1982001	1983000	0.0545	0.537	64	0	20	2	-10	0	10	VIT_207s0104g00830	VIT_207s0104g00830	366.557	494.135	238.979	0.483631	-1.04802	0.0110195	0.462973	Down	15.5728	5.71361	LOC100263109	At2g48020; T9J23.17	PREDICTED: sugar transporter ERD6-like 7 [Vitis vinifera]
chr7	1986001	1987000	0.24	1	110	2	114	0	1.82	1.82	0	VIT_207s0104g00840	VIT_207s0104g00840	84.6742	128.145	41.2033	0.321536	-1.63695	0.0264099	0.875435	Down	2.32391	0.79005	LOC100852842	RKF3; Synonyms=AT2324; At2g48010; T9J23.16	unnamed protein product, partial [Vitis vinifera]
chr7	2313001	2314000	1	1	62	1	11	0	1.61	1.61	0	VIT_207s0104g01280	VIT_207s0104g01280	171.942	238.816	105.068	0.439955	-1.18457	0.0318094	0.973193	Down	5.39411	2.62039	LOC100261462	NHX2; At3g05030; T9J14.2	sodium/hydrogen exchanger 2-like [Vitis vinifera]
chr7	4490001	4491000	1	1	15	0	127	1	-0.79	0	0.79	VIT_207s0005g02070	VIT_207s0005g02070	427.447	709.652	145.242	0.204666	-2.28866	2.10509e-08	5.60886e-06	Down	30.2721	6.82893	LOC100852938		PREDICTED: protein NIM1-INTERACTING 1 [Vitis vinifera]
chr7	4979001	4980000	1	1	10	0	31	1	-3.23	0	3.23	VIT_207s0005g02660	VIT_207s0005g02660	601.631	858.184	345.077	0.402102	-1.31437	0.000192708	0.0196909	Down	4.96626	2.063	LOC100267452	ABCB11; Synonyms=MDR8, PGP11; At1g02520; T14P4.15	PREDICTED: ABC transporter B family member 11 [Vitis vinifera]
chr7	7204001	7205000	0.557	1	163	0	287	3	-1.05	0	1.05	VIT_207s0005g04110	VIT_207s0005g04110	39.0838	1.94159	76.2261	39.2595	5.29497	4.77964e-05	0.00609737	Up	0.028828	0.957532	LOC100241197	CESA4; Synonyms=IRX5; At5g44030; MRH10.14	PREDICTED: cellulose synthase A catalytic subunit 4 [UDP-forming] [Vitis vinifera]
chr7	7205001	7206000	1	1	53	0	373	1	-0.27	0	0.27	VIT_207s0005g04110	VIT_207s0005g04110	39.0838	1.94159	76.2261	39.2595	5.29497	4.77964e-05	0.00609737	Up	0.028828	0.957532	LOC100241197	CESA4; Synonyms=IRX5; At5g44030; MRH10.14	PREDICTED: cellulose synthase A catalytic subunit 4 [UDP-forming] [Vitis vinifera]
chr7	7206001	7207000	0.0413	0.456	202	0	52	2	-3.85	0	3.85	VIT_207s0005g04110	VIT_207s0005g04110	39.0838	1.94159	76.2261	39.2595	5.29497	4.77964e-05	0.00609737	Up	0.028828	0.957532	LOC100241197	CESA4; Synonyms=IRX5; At5g44030; MRH10.14	PREDICTED: cellulose synthase A catalytic subunit 4 [UDP-forming] [Vitis vinifera]
chr7	7207001	7208000	1	1	177	1	89	0	0.56	0.56	0	VIT_207s0005g04110	VIT_207s0005g04110	39.0838	1.94159	76.2261	39.2595	5.29497	4.77964e-05	0.00609737	Up	0.028828	0.957532	LOC100241197	CESA4; Synonyms=IRX5; At5g44030; MRH10.14	PREDICTED: cellulose synthase A catalytic subunit 4 [UDP-forming] [Vitis vinifera]
chr7	7958001	7959000	1	1	30	1	20	0	3.33	3.33	0	VIT_207s0005g04710	VIT_207s0005g04710	131.884	184.451	79.3163	0.430012	-1.21755	0.0471347	1	Down	2.07533	0.757277	LOC100265222	ALE2; At2g20300; F11A3.15	PREDICTED: receptor-like serine/threonine-protein kinase ALE2 isoform X1 [Vitis vinifera]
chr7	7971001	7972000	1	1	135	1	10	0	0.74	0.74	0	VIT_207s0005g04710	VIT_207s0005g04710	131.884	184.451	79.3163	0.430012	-1.21755	0.0471347	1	Down	2.07533	0.757277	LOC100265222	ALE2; At2g20300; F11A3.15	PREDICTED: receptor-like serine/threonine-protein kinase ALE2 isoform X1 [Vitis vinifera]
chr7	7977001	7978000	1	1	71	1	45	0	1.41	1.41	0	VIT_207s0005g04710	VIT_207s0005g04710	131.884	184.451	79.3163	0.430012	-1.21755	0.0471347	1	Down	2.07533	0.757277	LOC100265222	ALE2; At2g20300; F11A3.15	PREDICTED: receptor-like serine/threonine-protein kinase ALE2 isoform X1 [Vitis vinifera]
chr7	15897001	15898000	1	1	198	1	53	0	0.51	0.51	0	VIT_207s0129g00660	VIT_207s0129g00660	12.65	24.2699	1.03008	0.0424427	-4.55834	0.0243253	0.829767	Down	0.349212	0.0138228	LOC100250868	GH3.1; At2g14960; T26I20.12	PREDICTED: probable indole-3-acetic acid-amido synthetase GH3.1 [Vitis vinifera]
chr7	16707001	16708000	1	1	10	0	20	1	-5	0	5	VIT_207s0031g00490	VIT_207s0031g00490	129.249	186.393	72.1057	0.386848	-1.37016	0.0272846	0.885778	Down	0.862704	0.507056	LOC100261036	At5g67130; K21H1.9	PREDICTED: PI-PLC X domain-containing protein At5g67130 [Vitis vinifera]
chr7	16708001	16709000	1	1	104	0	300	2	-0.67	0	0.67	VIT_207s0031g00490	VIT_207s0031g00490	129.249	186.393	72.1057	0.386848	-1.37016	0.0272846	0.885778	Down	0.862704	0.507056	LOC100261036	At5g67130; K21H1.9	PREDICTED: PI-PLC X domain-containing protein At5g67130 [Vitis vinifera]
chr7	16863001	16864000	1	1	75	1	32	0	1.33	1.33	0	VIT_207s0031g00700	VIT_207s0031g00700	158.155	234.933	81.3765	0.346382	-1.52956	0.00791716	0.367877	Down	3.40012	1.09536	LOC100255889	CML13; Os07g0618800, LOC_Os07g42660; P0552F09.133, P0560B08.106	hypothetical protein VITISV_003014 [Vitis vinifera]
chr7	17795001	17796000	1	1	22	0	23	1	-4.35	0	4.35	VIT_207s0031g01710	VIT_207s0031g01710	307.29	529.084	85.4968	0.161594	-2.62955	1.90089e-08	5.12972e-06	Down	15.5348	2.44455	LOC100266268	WRKY51; At5g64810; MXK3.3	PREDICTED: probable WRKY transcription factor 51 [Vitis vinifera]
chr8	3761001	3762000	1	1	21	0	94	2	-2.13	0	2.13	VIT_208s0032g00496	VIT_208s0032g00496	525.031	347.545	702.516	2.02137	1.01533	0.00536596	0.279574	Up	2.74669	5.15074	LOC100249668	QKY {ECO:0000303|PubMed:19180193}; At1g74720 {ECO:0000312|Araport:AT1G74720}; F1M20.40 {ECO:0000312|EMBL:AAG52366.1}, F25A4.30 {ECO:0000312|EMBL:AAD55273.1}	PREDICTED: uncharacterized protein LOC100249668 [Vitis vinifera]
chr8	3763001	3764000	0.555	1	240	3	108	0	1.25	1.25	0	VIT_208s0032g00496	VIT_208s0032g00496	525.031	347.545	702.516	2.02137	1.01533	0.00536596	0.279574	Up	2.74669	5.15074	LOC100249668	QKY {ECO:0000303|PubMed:19180193}; At1g74720 {ECO:0000312|Araport:AT1G74720}; F1M20.40 {ECO:0000312|EMBL:AAG52366.1}, F25A4.30 {ECO:0000312|EMBL:AAD55273.1}	PREDICTED: uncharacterized protein LOC100249668 [Vitis vinifera]
chr8	8633001	8634000	0.106	0.768	286	0	139	2	-1.44	0	1.44	VIT_208s0058g00104	VIT_208s0058g00104	47.4986	80.5761	14.4211	0.178975	-2.48217	0.00969548	0.426946	Down	2.77407	0.388332	LOC100247292	RLP30 {ECO:0000303|PubMed:18434605}; At3g05360 {ECO:0000312|Araport:AT3G05360}; T12H1.33 {ECO:0000312|EMBL:AAF27042.1}	PREDICTED: probably inactive leucine-rich repeat receptor-like protein kinase At2g25790 [Vitis vinifera]
chr8	8634001	8635000	0.0574	0.552	453	0	436	4	-0.92	0	0.92	VIT_208s0058g00104	VIT_208s0058g00104	47.4986	80.5761	14.4211	0.178975	-2.48217	0.00969548	0.426946	Down	2.77407	0.388332	LOC100247292	RLP30 {ECO:0000303|PubMed:18434605}; At3g05360 {ECO:0000312|Araport:AT3G05360}; T12H1.33 {ECO:0000312|EMBL:AAF27042.1}	PREDICTED: probably inactive leucine-rich repeat receptor-like protein kinase At2g25790 [Vitis vinifera]
chr8	8786001	8787000	0.4	1	20	1	30	0	5	5	0	VIT_208s0058g00150	VIT_208s0058g00150	17.9894	34.9487	1.03008	0.0294741	-5.08441	0.00501785	0.266047	Down	0.738061	0.0210225	LOC100250641	AMT2; At2g38290; F16M14.22	PREDICTED: ammonium transporter 2-like [Vitis vinifera]
chr8	10329001	10330000	1	1	35	1	23	0	2.86	2.86	0	VIT_208s0058g00970	VIT_208s0058g00970	1087.8	1854.22	321.386	0.173326	-2.52844	8.1706e-16	6.61473e-13	Down	31.3886	5.06731	LOC100263665	PNC1	PREDICTED: cationic peroxidase 1-like [Vitis vinifera]
chr8	10844001	10845000	1	1	30	0	120	2	-1.67	0	1.67	VIT_208s0058g01390	VIT_208s0058g01390	387.759	710.623	64.8952	0.0913215	-3.4529	2.02097e-14	1.57553e-11	Down	18.2451	1.57109	LOC100255013	WRKY70; At3g56400; T5P19.50	unnamed protein product, partial [Vitis vinifera]
chr8	10845001	10846000	0.123	0.829	52	0	61	4	-6.56	0	6.56	VIT_208s0058g01390	VIT_208s0058g01390	387.759	710.623	64.8952	0.0913215	-3.4529	2.02097e-14	1.57553e-11	Down	18.2451	1.57109	LOC100255013	WRKY70; At3g56400; T5P19.50	unnamed protein product, partial [Vitis vinifera]
chr8	11755001	11756000	1	1	103	1	11	0	0.97	0.97	0	VIT_208s0040g00800	VIT_208s0040g00800	86.4602	35.9195	137.001	3.81411	1.93135	0.00889495	0.403513	Up	0.566772	2.28843	LOC100241372	At5g07050; MOJ9.22	PREDICTED: WAT1-related protein At5g07050 [Vitis vinifera]
chr8	12152001	12153000	0.000714	0.0301	10	8	10	0	80	80	0	VIT_208s0040g01140	VIT_208s0040g01140	92.7481	150.473	35.0228	0.232751	-2.10314	0.00377083	0.214519	Down	3.6284	0.769268	LOC100260104	SCPL45; At1g28110; F13K9.20	PREDICTED: serine carboxypeptidase-like 45 [Vitis vinifera]
chr8	13284001	13285000	1	1	70	0	118	1	-0.85	0	0.85	VIT_208s0040g02170	VIT_208s0040g02170	49.2624	90.2841	8.24066	0.0912747	-3.45364	0.000628989	0.0521244	Down	1.13186	0.129222	MLO11	MLO6; At1g61560; T25B24.9	MLO11 protein [Vitis vinifera]
chr8	13643001	13644000	0.196	1	10	1	41	0	10	10	0	VIT_208s0040g02600	VIT_208s0040g02600	57.9588	92.2257	23.6919	0.25689	-1.96078	0.0233128	0.809754	Down	1.8296	0.400754	LOC100255195	At2g39490; F12L6.15	hypothetical protein VITISV_021358 [Vitis vinifera]
chr8	13770001	13771000	0.109	0.777	174	0	86	2	-2.33	0	2.33	VIT_208s0040g02730	VIT_208s0040g02730	45.0124	77.6637	12.361	0.15916	-2.65145	0.00741524	0.348623	Down	1.53699	0.235087	LOC100267121		PREDICTED: exocyst complex component EXO70B1-like [Vitis vinifera]
chr8	14399001	14400000	1	1	41	0	85	1	-1.18	0	1.18	VIT_208s0007g00020	VIT_208s0007g00020	40.4215	8.73717	72.1057	8.25276	3.04488	0.00392789	0.221064	Up	0.111171	0.716738	LOC100246026	CHX20; At3g53720; F5K20_20	PREDICTED: cation/H(+) antiporter 20 [Vitis vinifera]
chr8	14994001	14995000	1	1	30	1	10	0	3.33	3.33	0	VIT_208s0007g00810	VIT_208s0007g00810	76.2446	117.466	35.0228	0.298152	-1.74588	0.0234858	0.814421	Down	2.31577	0.649504	LOC100854743	LECRK41; Synonyms=LECRKE, LRK1; At2g37710; F13M22.21	PREDICTED: L-type lectin-domain containing receptor kinase IV.1 [Vitis vinifera]
chr8	15667001	15668000	1	1	144	3	10	0	2.08	2.08	0	VIT_208s0007g01560	VIT_208s0007g01560	1068.93	1949.36	188.505	0.096701	-3.37033	1.6092e-24	3.76357e-21	Down	50.0728	3.85276	LOC100246012		PREDICTED: uncharacterized protein LOC100246012 [Vitis vinifera]
chr8	16430001	16431000	1	1	10	0	10	1	-10	0	10	VIT_208s0007g02360	VIT_208s0007g02360	1535.41	2763.86	306.964	0.111064	-3.17054	6.18563e-26	1.64414e-22	Down	162.164	17.7223	LOC100247789	NHL10 {ECO:0000303|PubMed:14666423}; Synonyms=YLS9 {ECO:0000303|PubMed:11230571}; At2g35980; F11F19.11	PREDICTED: protein YLS9 [Vitis vinifera]
chr8	17020001	17021000	1	1	96	3	11	0	3.12	3.12	0	VIT_208s0007g02940	VIT_208s0007g02940	8.25177	16.5035	0	0	#NAME?	0.0327809	0.981515	Down	0.443258	0	LOC100249478	NAC090; At5g22380; MWD9.18	hypothetical protein VITISV_027899 [Vitis vinifera]
chr8	19876001	19877000	0.249	1	603	0	612	3	-0.49	0	0.49	VIT_208s0007g06060	VIT_208s0007g06060	840.543	1433.87	247.22	0.172415	-2.53605	4.8983e-14	3.68229e-11	Down	52.2639	8.50931	G1	GNS1	beta 1-3 glucanase precursor [Vitis vinifera]
chr8	19879001	19880000	1	1	161	1	102	0	0.62	0.62	0	VIT_208s0007g06060	VIT_208s0007g06060	840.543	1433.87	247.22	0.172415	-2.53605	4.8983e-14	3.68229e-11	Down	52.2639	8.50931	G1	GNS1	beta 1-3 glucanase precursor [Vitis vinifera]
chr8	20317001	20318000	1	1	173	0	259	1	-0.39	0	0.39	VIT_208s0007g06610	VIT_208s0007g06610	9.22257	18.4451	0	0	#NAME?	0.0229701	0.801819	Down	0.348352	0	LOC100264008	LECRKS5; At5g06740; MPH15.10	PREDICTED: probable L-type lectin-domain containing receptor kinase S.5 [Vitis vinifera]
chr8	20968001	20969000	1	1	51	0	109	1	-0.92	0	0.92	VIT_208s0007g07440	VIT_208s0007g07440	183.636	328.129	39.1431	0.119292	-3.06743	1.64064e-07	3.59727e-05	Down	4.65088	0.57981	LOC100250413	APUM12; At5g56510; MKN22.2	PREDICTED: uncharacterized protein LOC100250413 [Vitis vinifera]
chr8	20970001	20971000	1	1	46	2	10	0	4.35	4.35	0	VIT_208s0007g07440	VIT_208s0007g07440	183.636	328.129	39.1431	0.119292	-3.06743	1.64064e-07	3.59727e-05	Down	4.65088	0.57981	LOC100250413	APUM12; At5g56510; MKN22.2	PREDICTED: uncharacterized protein LOC100250413 [Vitis vinifera]
chr8	20972001	20973000	0.419	1	43	0	31	1	-3.23	0	3.23	VIT_208s0007g07440	VIT_208s0007g07440	183.636	328.129	39.1431	0.119292	-3.06743	1.64064e-07	3.59727e-05	Down	4.65088	0.57981	LOC100250413	APUM12; At5g56510; MKN22.2	PREDICTED: uncharacterized protein LOC100250413 [Vitis vinifera]
chr8	21337001	21338000	1	1	20	0	403	1	-0.25	0	0.25	VIT_208s0007g07920	VIT_208s0007g07920	148.239	222.312	74.1659	0.333611	-1.58376	0.00746713	0.350057	Down	2.82952	0.880324	LOC100253823		PREDICTED: uncharacterized protein LOC100253823 [Vitis vinifera]
chr8	21384001	21385000	1	1	168	1	20	0	0.6	0.6	0	VIT_208s0007g08000	VIT_208s0007g08000	190.925	308.713	73.1358	0.236905	-2.07762	0.00014383	0.0154463	Down	72.9677	16.0957			unnamed protein product, partial [Vitis vinifera]
chr8	21822001	21823000	1	1	111	1	102	0	0.9	0.9	0	VIT_208s0007g08460	VIT_208s0007g08460	9.70797	19.4159	0	0	#NAME?	0.0192695	0.712441	Down	0.470604	0	LOC100257236		PREDICTED: uncharacterized protein LOC100257236 [Vitis vinifera]
chr8	21823001	21824000	1	1	120	1	30	0	0.83	0.83	0	VIT_208s0007g08460	VIT_208s0007g08460	9.70797	19.4159	0	0	#NAME?	0.0192695	0.712441	Down	0.470604	0	LOC100257236		PREDICTED: uncharacterized protein LOC100257236 [Vitis vinifera]
chr8	21824001	21825000	0.123	0.828	38	0	21	2	-9.52	0	9.52	VIT_208s0007g08460	VIT_208s0007g08460	9.70797	19.4159	0	0	#NAME?	0.0192695	0.712441	Down	0.470604	0	LOC100257236		PREDICTED: uncharacterized protein LOC100257236 [Vitis vinifera]
chr9	402001	403000	0.164	0.945	26	1	133	0	3.85	3.85	0	VIT_209s0002g00580	VIT_209s0002g00580	162.645	20.3867	304.904	14.956	3.90265	1.79324e-09	5.80708e-07	Up	0.583216	8.0747	LOC100259984	GLIP1 {ECO:0000303|PubMed:16126835}; At5g40990 {ECO:0000312|Araport:AT5G40990}; MEE6.6 {ECO:0000312|EMBL:BAB09701.1}	PREDICTED: GDSL esterase/lipase 1 isoform X1 [Vitis vinifera]
chr9	1100001	1101000	0.333	1	20	1	40	0	5	5	0	VIT_209s0002g01320	VIT_209s0002g01320	25.9633	43.6858	8.24066	0.188634	-2.40634	0.0485583	1	Down	2.40124	0.478244	LOC100259980		PREDICTED: germin-like protein [Vitis vinifera]
chr9	1387001	1388000	1	1	67	1	55	0	1.49	1.49	0	VIT_209s0002g01590	VIT_209s0002g01590	185.593	264.057	107.129	0.405703	-1.30151	0.0153628	0.599948	Down	6.1593	2.45802	LOC100249800	NFYA3; Synonyms=HAP2C; At1g72830; F28P22.32, F3N23.3	PREDICTED: nuclear transcription factor Y subunit A-3 isoform X1 [Vitis vinifera]
chr9	1388001	1389000	0.407	1	51	0	35	1	-2.86	0	2.86	VIT_209s0002g01590	VIT_209s0002g01590	185.593	264.057	107.129	0.405703	-1.30151	0.0153628	0.599948	Down	6.1593	2.45802	LOC100249800	NFYA3; Synonyms=HAP2C; At1g72830; F28P22.32, F3N23.3	PREDICTED: nuclear transcription factor Y subunit A-3 isoform X1 [Vitis vinifera]
chr9	2136001	2137000	1	1	128	4	10	0	3.12	3.12	0	VIT_209s0002g02320	VIT_209s0002g02320	126.737	234.933	18.5415	0.0789225	-3.66342	2.23812e-07	4.80717e-05	Down	2.33951	0.173447	CWINV	CWINV1; Synonyms=BFRUCT1; At3g13790; MMM17.26	unnamed protein product, partial [Vitis vinifera]
chr9	2263001	2264000	0.207	1	47	5	42	1	8.26	10.64	2.38	VIT_209s0002g02480	VIT_209s0002g02480	194.745	267.94	121.55	0.453645	-1.14036	0.0297812	0.934223	Down	8.73552	3.99156	LOC100260060		PREDICTED: uncharacterized protein LOC100260060 [Vitis vinifera]
chr9	2264001	2265000	1	1	10	0	267	1	-0.37	0	0.37	VIT_209s0002g02480	VIT_209s0002g02480	194.745	267.94	121.55	0.453645	-1.14036	0.0297812	0.934223	Down	8.73552	3.99156	LOC100260060		PREDICTED: uncharacterized protein LOC100260060 [Vitis vinifera]
chr9	2717001	2718000	0.00129	0.0465	26	3	10	7	-58.46	11.54	70	VIT_209s0002g03010	VIT_209s0002g03010	11.6792	22.3283	1.03008	0.0461334	-4.43804	0.032751	0.981515	Down	0.321154	0	LOC100266874	At2g19230; F27F23.3	unnamed protein product, partial [Vitis vinifera]
chr9	3638001	3639000	0.327	1	81	0	209	5	-2.39	0	2.39	VIT_209s0002g03920	VIT_209s0002g03920	7.28097	14.5619	0	0	#NAME?	0.0470467	1	Down	0.14466	0	LOC100253256	PLA2G6; Synonyms=PLPLA9	unnamed protein product, partial [Vitis vinifera]
chr9	5282001	5283000	0.578	1	333	4	99	0	1.2	1.2	0	VIT_209s0002g05560	VIT_209s0002g05560	85.5672	149.503	21.6317	0.144691	-2.78895	0.000333817	0.0304838	Down	1.44965	0.241923	LOC100251419	PDR1	PREDICTED: pleiotropic drug resistance protein 1-like [Vitis vinifera]
chr9	19480001	19481000	1	1	22	0	44	1	-2.27	0	2.27	VIT_209s0018g01870	VIT_209s0018g01870	390.286	594.128	186.445	0.313813	-1.67202	4.67703e-05	0.00602157	Down	6.96145	1.95178	LOC100241666	PGDH2; Synonyms=3-PGDH, PGDH; At1g17745; F11A6.8	PREDICTED: D-3-phosphoglycerate dehydrogenase 3, chloroplastic-like [Vitis vinifera]
chr9	21786001	21787000	1	1	10	0	98	2	-2.04	0	2.04	VIT_209s0054g00910	VIT_209s0054g00910	79.6127	125.233	33.9927	0.271436	-1.88132	0.0135667	0.541965	Down	2.48138	0.633833	LOC100263357	At3g50940 {ECO:0000312|EMBL:AEE78729.1}; F18B3.220 {ECO:0000312|EMBL:CAB42923.1}	PREDICTED: probable mitochondrial chaperone BCS1-A [Vitis vinifera]
chr10	464001	465000	1	1	263	4	52	0	1.52	1.52	0	VIT_210s0116g00960	VIT_210s0116g00960	80.3353	118.437	42.2334	0.356589	-1.48767	0.0469071	1	Down	1.72197	0.654355	LOC100250303	JMJ25; Synonyms=IBM1; At3g07610; MLP3.6	PREDICTED: lysine-specific demethylase JMJ25-like [Vitis vinifera]
chr10	465001	466000	1	1	99	1	10	0	1.01	1.01	0	VIT_210s0116g00960	VIT_210s0116g00960	80.3353	118.437	42.2334	0.356589	-1.48767	0.0469071	1	Down	1.72197	0.654355	LOC100250303	JMJ25; Synonyms=IBM1; At3g07610; MLP3.6	PREDICTED: lysine-specific demethylase JMJ25-like [Vitis vinifera]
chr10	1820001	1821000	1	1	20	1	11	0	5	5	0	VIT_210s0003g00580	VIT_210s0003g00580	279.415	480.544	78.2862	0.162912	-2.61784	6.5649e-08	1.58833e-05	Down	18.8745	2.86069	LOC100264074	PTI5	PREDICTED: pathogenesis-related genes transcriptional activator PTI5-like [Vitis vinifera]
chr10	2471001	2472000	0.071	0.62	42	5	30	0	11.9	11.9	0	VIT_210s0003g01100	VIT_210s0003g01100	8.7557	0	17.5114	Inf	Inf	0.0247937	0.833678	Up	0	0.497506	LOC100246411	OsI_14861 {ECO:0000312|EMBL:EAY93058.1}	PREDICTED: senescence-specific cysteine protease SAG39-like [Vitis vinifera]
chr10	2473001	2474000	0.501	1	176	0	202	2	-0.99	0	0.99	VIT_210s0003g01100	VIT_210s0003g01100	8.7557	0	17.5114	Inf	Inf	0.0247937	0.833678	Up	0	0.497506	LOC100246411	OsI_14861 {ECO:0000312|EMBL:EAY93058.1}	PREDICTED: senescence-specific cysteine protease SAG39-like [Vitis vinifera]
chr10	2475001	2476000	1	1	32	0	105	1	-0.95	0	0.95	VIT_210s0003g01100	VIT_210s0003g01100	8.7557	0	17.5114	Inf	Inf	0.0247937	0.833678	Up	0	0.497506	LOC100246411	OsI_14861 {ECO:0000312|EMBL:EAY93058.1}	PREDICTED: senescence-specific cysteine protease SAG39-like [Vitis vinifera]
chr10	2536001	2537000	1	1	10	1	10	0	10	10	0	VIT_210s0003g01160	VIT_210s0003g01160	31.1544	59.2186	3.09025	0.0521837	-4.26026	0.00110429	0.0824261	Down	1.63914	0.0798673	LOC100256680	BHLH30; Synonyms=EN53; At1g68810; F14K14.8, T6L1.1	PREDICTED: transcription factor bHLH106-like [Vitis vinifera]
chr10	6955001	6956000	0.323	1	30	1	63	0	3.33	3.33	0	VIT_210s0003g04100	VIT_210s0003g04100	466.972	646.551	287.393	0.444502	-1.16974	0.0021045	0.138864	Down	6.42578	2.62923	LOC100242923	ARF6; At1g30330; T4K22.6	PREDICTED: auxin response factor 6 [Vitis vinifera]
chr10	6961001	6962000	1	1	85	1	45	0	1.18	1.18	0	VIT_210s0003g04100	VIT_210s0003g04100	466.972	646.551	287.393	0.444502	-1.16974	0.0021045	0.138864	Down	6.42578	2.62923	LOC100242923	ARF6; At1g30330; T4K22.6	PREDICTED: auxin response factor 6 [Vitis vinifera]
chr10	6962001	6963000	0.126	0.838	344	13	130	1	3.01	3.78	0.77	VIT_210s0003g04100	VIT_210s0003g04100	466.972	646.551	287.393	0.444502	-1.16974	0.0021045	0.138864	Down	6.42578	2.62923	LOC100242923	ARF6; At1g30330; T4K22.6	PREDICTED: auxin response factor 6 [Vitis vinifera]
chr10	10089001	10090000	0.199	1	88	1	355	0	1.14	1.14	0	VIT_210s0003g05450	VIT_210s0003g05450	372.375	674.704	70.0456	0.103817	-3.26789	5.21013e-13	3.32328e-10	Down	12.4928	1.27736	LOC100245607	At4g20840 {ECO:0000312|Araport:AT4G20840}; F21C20.190 {ECO:0000312|EMBL:CAB45850.1}	PREDICTED: reticuline oxidase-like protein [Vitis vinifera]
chr10	16307001	16308000	1	1	131	1	61	0	0.76	0.76	0	VIT_210s0071g00150	VIT_210s0071g00150	167.54	315.509	19.5716	0.0620317	-4.01085	6.41471e-10	2.25039e-07	Down	4.54367	0.262903	LOC100247995	At5g66900; MUD21.16	PREDICTED: probable disease resistance protein At5g66900 [Vitis vinifera]
chr10	16357001	16358000	0.0977	0.736	44	10	12	0	22.73	22.73	0	VIT_210s0071g00190	VIT_210s0071g00190	25.8743	46.5982	5.15041	0.110528	-3.17752	0.0135464	0.541965	Down	0.771086	0.0795888	LOC100253123	At5g66900; MUD21.16	PREDICTED: probable disease resistance protein At5g66900 [Vitis vinifera]
chr11	311001	312000	0.0142	0.238	10	2	70	0	20	20	0	VIT_211s0016g00290	VIT_211s0016g00290	16.5925	30.0947	3.09025	0.102684	-3.28372	0.0370397	1	Down	0.373434	0.0356959	LOC104880619	PMEU1	PREDICTED: pectinesterase-like [Vitis vinifera]
chr11	701001	702000	1	1	109	1	12	0	0.92	0.92	0	VIT_211s0016g00730	VIT_211s0016g00730	59.4002	28.1531	90.6472	3.21979	1.68697	0.0458432	1	Up	1.2299	4.13221	LOC100268126	LHCA6 {ECO:0000303|PubMed:10366881}; At1g19150 {ECO:0000312|Araport:AT1G19150}; T29M8.2 {ECO:0000312|EMBL:AAF82226.1}	PREDICTED: chlorophyll a-b binding protein, chloroplastic [Vitis vinifera]
chr11	868001	869000	0.299	1	103	4	64	0	3.88	3.88	0	VIT_211s0016g01060	VIT_211s0016g01060	33.7	60.1894	7.21057	0.119798	-3.06132	0.00741997	0.348623	Down	0.56198	0.0723388	LOC100257697	RIPK {ECO:0000303|PubMed:21320696}; Synonyms=PBL14 {ECO:0000303|PubMed:20413097}, PIX8 {ECO:0000303|PubMed:23951354}; At2g05940 {ECO:0000312|Araport:AT2G05940}	PREDICTED: serine/threonine-protein kinase At5g01020 [Vitis vinifera]
chr11	1044001	1045000	1	1	109	1	20	0	0.92	0.92	0	VIT_211s0016g01300	VIT_211s0016g01300	31.2989	3.88319	58.7147	15.1202	3.91841	0.00179016	0.12436	Up	0.0812995	1.0431	LOC100254224	TT2; Synonyms=MYB123; At5g35550; MOK9.18	PREDICTED: transcription factor TT2-like [Vitis vinifera]
chr11	1460001	1461000	1	1	258	1	102	0	0.39	0.39	0	VIT_211s0016g01810	VIT_211s0016g01810	223.394	341.72	105.068	0.307469	-1.70149	0.000771792	0.0621479	Down	6.42425	1.82349	LOC100247440	At3g55350 {ECO:0000312|Araport:AT3G55350}; T22E16.10 {ECO:0000312|EMBL:CAB75893.1}	PREDICTED: uncharacterized protein LOC100247440 [Vitis vinifera]
chr11	2195001	2196000	0.412	1	30	0	21	1	-4.76	0	4.76	VIT_211s0016g02780	VIT_211s0016g02780	11.1642	22.3283	0	0	#NAME?	0.0114769	0.476485	Down	0.50497	0	LOC100243880	MYB36 {ECO:0000303|PubMed:9839469}; At5g57620 {ECO:0000312|Araport:AT5G57620}; MUA2.20 {ECO:0000312|EMBL:BAB08797.1}	PREDICTED: transcription factor RAX2 [Vitis vinifera]
chr11	2479001	2480000	0.508	1	176	0	231	2	-0.87	0	0.87	VIT_211s0016g03080	VIT_211s0016g03080	351.284	623.251	79.3163	0.127262	-2.97412	5.77538e-11	2.53263e-08	Down	6.86317	0.832182	LOC100247568	HSL1; At1g28440; F3M18.12	PREDICTED: receptor-like protein kinase 5 [Vitis vinifera]
chr11	2481001	2482000	1	1	42	0	65	1	-1.54	0	1.54	VIT_211s0016g03080	VIT_211s0016g03080	351.284	623.251	79.3163	0.127262	-2.97412	5.77538e-11	2.53263e-08	Down	6.86317	0.832182	LOC100247568	HSL1; At1g28440; F3M18.12	PREDICTED: receptor-like protein kinase 5 [Vitis vinifera]
chr11	2483001	2484000	0.474	1	63	1	70	0	1.59	1.59	0	VIT_211s0016g03080	VIT_211s0016g03080	351.284	623.251	79.3163	0.127262	-2.97412	5.77538e-11	2.53263e-08	Down	6.86317	0.832182	LOC100247568	HSL1; At1g28440; F3M18.12	PREDICTED: receptor-like protein kinase 5 [Vitis vinifera]
chr11	6015001	6016000	1	1	41	1	20	0	2.44	2.44	0	VIT_211s0118g00350	VIT_211s0118g00350	820.427	490.252	1150.6	2.34696	1.23079	0.000132023	0.0143245	Up	9.43779	20.8914	VPP2		unnamed protein product, partial [Vitis vinifera]
chr11	6016001	6017000	0.252	1	40	1	119	0	2.5	2.5	0	VIT_211s0118g00350	VIT_211s0118g00350	820.427	490.252	1150.6	2.34696	1.23079	0.000132023	0.0143245	Up	9.43779	20.8914	VPP2		unnamed protein product, partial [Vitis vinifera]
chr11	8371001	8372000	0.367	1	167	0	97	1	-1.03	0	1.03	VIT_211s0037g00530	VIT_211s0037g00530	10.8159	0	21.6317	Inf	Inf	0.0116207	0.479615	Up	0	0.164505	LOC100248512	CESA9; Os09g0422500, LOC_Os09g25490; OJ1740_D06.31, OsJ_028258, P0418B08.2	PREDICTED: cellulose synthase A catalytic subunit 7 [UDP-forming] [Vitis vinifera]
chr11	8374001	8375000	1	1	127	2	20	0	1.57	1.57	0	VIT_211s0037g00530	VIT_211s0037g00530	10.8159	0	21.6317	Inf	Inf	0.0116207	0.479615	Up	0	0.164505	LOC100248512	CESA9; Os09g0422500, LOC_Os09g25490; OJ1740_D06.31, OsJ_028258, P0418B08.2	PREDICTED: cellulose synthase A catalytic subunit 7 [UDP-forming] [Vitis vinifera]
chr11	14090001	14091000	1	1	10	1	10	0	10	10	0	VIT_211s0065g00350	VIT_211s0065g00350	99.6215	144.649	54.5943	0.377427	-1.40573	0.0409564	1	Down	2.66011	0.941756	LOC100267215		PREDICTED: cytochrome P450 CYP73A100 [Vitis vinifera]
chr11	18990001	18991000	1	1	124	2	10	0	1.61	1.61	0	VIT_211s0052g01260	VIT_211s0052g01260	26.8451	48.5398	5.15041	0.106107	-3.23641	0.0110042	0.462973	Down	2.43766	0.197602	LOC100251303	XTH23; Synonyms=XTR6; At4g25810; F14M19.90	PREDICTED: probable xyloglucan endotransglucosylase/hydrolase protein 23 [Vitis vinifera]
chr12	2350001	2351000	0.523	1	21	2	12	0	9.52	9.52	0	VIT_212s0028g01700	VIT_212s0028g01700	36.1566	64.0726	8.24066	0.128614	-2.95888	0.00731105	0.345994	Down	2.15928	0.201962	LOC100250582	WRKY69; At3g58710; T20N10_60	PREDICTED: probable WRKY transcription factor 65 [Vitis vinifera]
chr12	2674001	2675000	0.432	1	67	0	51	1	-1.96	0	1.96	VIT_212s0028g02010	VIT_212s0028g02010	10.2712	0.970797	19.5716	20.1603	4.33345	0.0456894	1	Up	0.0245611	0.364239	LOC100264389	TBL1; At3g12060; MEC18.19, T21B14.12	PREDICTED: protein trichome birefringence-like 42 [Vitis vinifera]
chr12	5071001	5072000	0.257	1	179	3	144	0	1.68	1.68	0	VIT_212s0059g00160	VIT_212s0059g00160	38.8319	77.6637	0	0	#NAME?	2.89022e-06	0.0004644	Down	0.825029	0	LOC100243110	ACD6 {ECO:0000303|PubMed:10488236}; At4g14400 {ECO:0000312|EMBL:AEE83439.1}; dl3240w {ECO:0000312|EMBL:CAB10219.1}, FCAALL.190 {ECO:0000312|EMBL:CAB78482.1}	PREDICTED: ankyrin repeat-containing protein At5g02620-like [Vitis vinifera]
chr12	9023001	9024000	1	1	83	1	20	0	1.2	1.2	0	VIT_212s0057g00420	VIT_212s0057g00420	582.5	1063.02	101.978	0.0959322	-3.38184	6.4153e-18	7.10714e-15	Down	14.5746	1.36447	LOC100258038	At5g35735; F28J9_6	PREDICTED: cytochrome b561 and DOMON domain-containing protein At5g35735 [Vitis vinifera]
chr12	9243001	9244000	1	1	31	0	90	1	-1.11	0	1.11	VIT_212s0057g00613	VIT_212s0057g00613	66.2217	125.233	7.21057	0.0575774	-4.11835	1.37747e-05	0.00198592	Down	1.49081	0.0607216	LOC109123452	ACA13; At3g22910; F5N5.8	hypothetical protein VITISV_000631 [Vitis vinifera]
chr12	9646001	9647000	1	1	20	0	36	1	-2.78	0	2.78	VIT_212s0057g00950	VIT_212s0057g00950	352.073	580.536	123.61	0.212923	-2.23159	3.11047e-07	6.48241e-05	Down	21.9111	4.40815	LOC100854493		PREDICTED: uncharacterized protein LOC100854493 [Vitis vinifera]
chr12	9771001	9772000	0.459	1	290	0	246	1	-0.41	0	0.41	VIT_212s0057g01100	VIT_212s0057g01100	2128.6	2869.67	1387.52	0.483511	-1.04838	6.25147e-05	0.00753609	Down	13.6655	6.83758	LOC100259630	NUDT2; Synonyms=NUDX2; At5g47650; MNJ7.24	PREDICTED: nudix hydrolase 2-like isoform X1 [Vitis vinifera]
chr12	9772001	9773000	0.0739	0.635	201	12	59	0	5.97	5.97	0	VIT_212s0057g01100	VIT_212s0057g01100	2128.6	2869.67	1387.52	0.483511	-1.04838	6.25147e-05	0.00753609	Down	13.6655	6.83758	LOC100259630	NUDT2; Synonyms=NUDX2; At5g47650; MNJ7.24	PREDICTED: nudix hydrolase 2-like isoform X1 [Vitis vinifera]
chr12	9779001	9780000	0.514	1	186	2	130	0	1.08	1.08	0	VIT_212s0057g01100	VIT_212s0057g01100	2128.6	2869.67	1387.52	0.483511	-1.04838	6.25147e-05	0.00753609	Down	13.6655	6.83758	LOC100259630	NUDT2; Synonyms=NUDX2; At5g47650; MNJ7.24	PREDICTED: nudix hydrolase 2-like isoform X1 [Vitis vinifera]
chr12	9781001	9782000	0.0133	0.228	168	0	162	6	-3.7	0	3.7	VIT_212s0057g01100	VIT_212s0057g01100	2128.6	2869.67	1387.52	0.483511	-1.04838	6.25147e-05	0.00753609	Down	13.6655	6.83758	LOC100259630	NUDT2; Synonyms=NUDX2; At5g47650; MNJ7.24	PREDICTED: nudix hydrolase 2-like isoform X1 [Vitis vinifera]
chr12	9784001	9785000	0.591	1	30	0	149	5	-3.36	0	3.36	VIT_212s0057g01100	VIT_212s0057g01100	2128.6	2869.67	1387.52	0.483511	-1.04838	6.25147e-05	0.00753609	Down	13.6655	6.83758	LOC100259630	NUDT2; Synonyms=NUDX2; At5g47650; MNJ7.24	PREDICTED: nudix hydrolase 2-like isoform X1 [Vitis vinifera]
chr12	9785001	9786000	0.535	1	340	2	196	0	0.59	0.59	0	VIT_212s0057g01100	VIT_212s0057g01100	2128.6	2869.67	1387.52	0.483511	-1.04838	6.25147e-05	0.00753609	Down	13.6655	6.83758	LOC100259630	NUDT2; Synonyms=NUDX2; At5g47650; MNJ7.24	PREDICTED: nudix hydrolase 2-like isoform X1 [Vitis vinifera]
chr12	9786001	9787000	1	1	31	0	257	3	-1.17	0	1.17	VIT_212s0057g01100	VIT_212s0057g01100	2128.6	2869.67	1387.52	0.483511	-1.04838	6.25147e-05	0.00753609	Down	13.6655	6.83758	LOC100259630	NUDT2; Synonyms=NUDX2; At5g47650; MNJ7.24	PREDICTED: nudix hydrolase 2-like isoform X1 [Vitis vinifera]
chr12	10135001	10136000	1	1	72	0	112	1	-0.89	0	0.89	VIT_212s0057g01430	VIT_212s0057g01430	331.838	585.39	78.2862	0.133733	-2.90257	3.25046e-10	1.22177e-07	Down	35.5794	4.09246	LOC100252914	HIPP16 {ECO:0000303|PubMed:21072340, ECO:0000303|PubMed:23368984}; Synonyms=FP4 {ECO:0000303|PubMed:8837031}; At3g07600 {ECO:0000312|Araport:AT3G07600}; MLP3.5 {ECO:0000312|EMBL:AAF13078.1}	PREDICTED: uncharacterized protein LOC100252914 [Vitis vinifera]
chr12	14340001	14341000	1	1	95	1	30	0	1.05	1.05	0	VIT_212s0055g00920	VIT_212s0055g00920	47.1911	73.7805	20.6016	0.279229	-1.84048	0.0483166	1	Down	2.37238	0.610145	LOC100253830	ALD1; At2g13810; F13J11.16	PREDICTED: aminotransferase ALD1 [Vitis vinifera]
chr12	15535001	15536000	0.164	0.945	20	1	102	0	5	5	0	VIT_212s0034g00130	VIT_212s0034g00130	43.5265	75.7221	11.3309	0.149638	-2.74045	0.00661522	0.327502	Down	2.7261	0.462882	LOC100242982	GT6 {ECO:0000312|EMBL:ABB92748.1}	PREDICTED: anthocyanidin 3-O-glucosyltransferase 2 [Vitis vinifera]
chr12	18102001	18103000	4.21e-14	6.57e-11	272	13	59	27	-40.98	4.78	45.76	VIT_212s0034g01870	VIT_212s0034g01870	184.277	290.268	78.2862	0.269703	-1.89056	0.000583155	0.0490993	Down	10.3831	2.80192	LOC100249816	GLUA3; Synonyms=GLUA-3, GT22, GT3; Os03g0427300, LOC_Os03g31360; OSJNBa0083F15.19	PREDICTED: glutelin type-A 3 [Vitis vinifera]
chr12	18103001	18104000	1	1	81	1	20	0	1.23	1.23	0	VIT_212s0034g01870	VIT_212s0034g01870	184.277	290.268	78.2862	0.269703	-1.89056	0.000583155	0.0490993	Down	10.3831	2.80192	LOC100249816	GLUA3; Synonyms=GLUA-3, GT22, GT3; Os03g0427300, LOC_Os03g31360; OSJNBa0083F15.19	PREDICTED: glutelin type-A 3 [Vitis vinifera]
chr12	18111001	18112000	0.0628	0.58	71	7	69	1	8.41	9.86	1.45	VIT_212s0034g01890	VIT_212s0034g01890	34.0668	65.0434	3.09025	0.0475105	-4.39561	0.000557896	0.0472586	Down	2.92273	0.118925	LOC100254961	GLUA3; Synonyms=GLUA-3, GT22, GT3; Os03g0427300, LOC_Os03g31360; OSJNBa0083F15.19	PREDICTED: glutelin type-A 3 [Vitis vinifera]
chr12	18114001	18115000	0.0796	0.663	149	16	46	1	8.56	10.74	2.17	VIT_212s0034g01890	VIT_212s0034g01890	34.0668	65.0434	3.09025	0.0475105	-4.39561	0.000557896	0.0472586	Down	2.92273	0.118925	LOC100254961	GLUA3; Synonyms=GLUA-3, GT22, GT3; Os03g0427300, LOC_Os03g31360; OSJNBa0083F15.19	PREDICTED: glutelin type-A 3 [Vitis vinifera]
chr12	22313001	22314000	1	1	143	4	10	0	2.8	2.8	0	VIT_212s0035g02000	VIT_212s0035g02000	16.9074	2.91239	30.9025	10.6107	3.40745	0.0295388	0.931453	Up	0.23742	1.42796	LOC100253899		PREDICTED: 14 kDa proline-rich protein DC2.15 [Vitis vinifera]
chr12	22315001	22316000	0.0601	0.567	60	0	20	2	-10	0	10	VIT_212s0035g02000	VIT_212s0035g02000	16.9074	2.91239	30.9025	10.6107	3.40745	0.0295388	0.931453	Up	0.23742	1.42796	LOC100253899		PREDICTED: 14 kDa proline-rich protein DC2.15 [Vitis vinifera]
chr13	526001	527000	1	1	220	1	10	0	0.45	0.45	0	VIT_213s0067g00930	VIT_213s0067g00930	289.909	406.764	173.054	0.42544	-1.23297	0.00628448	0.315886	Down	8.05752	2.96429	LOC100243297	CCR3; Synonyms=CRR3; At3g55950; F27K19.130	PREDICTED: putative serine/threonine-protein kinase-like protein CCR3 [Vitis vinifera]
chr13	527001	528000	1	1	61	0	116	1	-0.86	0	0.86	VIT_213s0067g00930	VIT_213s0067g00930	289.909	406.764	173.054	0.42544	-1.23297	0.00628448	0.315886	Down	8.05752	2.96429	LOC100243297	CCR3; Synonyms=CRR3; At3g55950; F27K19.130	PREDICTED: putative serine/threonine-protein kinase-like protein CCR3 [Vitis vinifera]
chr13	606001	607000	0.319	1	73	5	31	0	6.85	6.85	0	VIT_213s0067g01070	VIT_213s0067g01070	2069.8	2788.13	1351.47	0.484722	-1.04477	7.09595e-05	0.00839116	Down	34.4927	15.5084	LOC100246707	At2g40140; T07M07.3, T7M7.3	PREDICTED: zinc finger CCCH domain-containing protein 29-like [Vitis vinifera]
chr13	2501001	2502000	1	1	128	1	20	0	0.78	0.78	0	VIT_213s0019g00480	VIT_213s0019g00480	47.3208	86.4009	8.24066	0.095377	-3.39022	0.000904814	0.0713312	Down	3.46512	0.231633	LOC100242729	ZAT12; Synonyms=RHL41; At5g59820; MMN10.11	PREDICTED: zinc finger protein ZAT12 [Vitis vinifera]
chr13	2925001	2926000	0.521	1	33	2	20	0	6.06	6.06	0	VIT_213s0019g01310	VIT_213s0019g01310	122.617	234.933	10.3008	0.0438458	-4.51142	3.95012e-09	1.24099e-06	Down	9.80254	0.335042	LOC104881137		PREDICTED: uncharacterized protein LOC104881137 [Vitis vinifera]
chr13	2926001	2927000	1	1	121	1	33	0	0.83	0.83	0	VIT_213s0019g01310	VIT_213s0019g01310	122.617	234.933	10.3008	0.0438458	-4.51142	3.95012e-09	1.24099e-06	Down	9.80254	0.335042	LOC104881137		PREDICTED: uncharacterized protein LOC104881137 [Vitis vinifera]
chr13	7301001	7302000	0.263	1	30	1	84	0	3.33	3.33	0	VIT_213s0019g05400	VIT_213s0019g05400	27.6973	54.3646	1.03008	0.0189477	-5.72184	0.000337571	0.0306273	Down	0.379296	0.00804866	LOC100254715		PREDICTED: myosin-9-like [Vitis vinifera]
chr13	7302001	7303000	1	1	31	0	258	2	-0.78	0	0.78	VIT_213s0019g05400	VIT_213s0019g05400	27.6973	54.3646	1.03008	0.0189477	-5.72184	0.000337571	0.0306273	Down	0.379296	0.00804866	LOC100254715		PREDICTED: myosin-9-like [Vitis vinifera]
chr13	7303001	7304000	1	1	97	1	30	0	1.03	1.03	0	VIT_213s0019g05400	VIT_213s0019g05400	27.6973	54.3646	1.03008	0.0189477	-5.72184	0.000337571	0.0306273	Down	0.379296	0.00804866	LOC100254715		PREDICTED: myosin-9-like [Vitis vinifera]
chr13	7486001	7487000	1	1	21	0	22	1	-4.55	0	4.55	VIT_213s0074g00110	VIT_213s0074g00110	133.677	193.189	74.1659	0.383904	-1.38118	0.024183	0.829036	Down	8.05867	2.82049	LOC100259215	BSPA	PREDICTED: bark storage protein A [Vitis vinifera]
chr13	10208001	10209000	1	1	55	0	62	1	-1.61	0	1.61	VIT_213s0106g00550	VIT_213s0106g00550	26.8451	48.5398	5.15041	0.106107	-3.23641	0.0110042	0.462973	Down	2.03677	0.21449	LOC100246540	SOT15; Synonyms=ST2A; At5g07010; MOJ9.18	PREDICTED: cytosolic sulfotransferase 15 [Vitis vinifera]
chr13	18626001	18627000	1	1	10	0	10	1	-10	0	10	VIT_213s0084g00080	VIT_213s0084g00080	52.5305	84.4593	20.6016	0.243924	-2.0355	0.0239162	0.825267	Down	1.07413	0.28774	LOC100267765	MAP65-5; At2g38720; T6A23.8	PREDICTED: 65-kDa microtubule-associated protein 5 isoform X1 [Vitis vinifera]
chr13	18629001	18630000	0.00766	0.159	15	8	10	0	53.33	53.33	0	VIT_213s0084g00080	VIT_213s0084g00080	52.5305	84.4593	20.6016	0.243924	-2.0355	0.0239162	0.825267	Down	1.07413	0.28774	LOC100267765	MAP65-5; At2g38720; T6A23.8	PREDICTED: 65-kDa microtubule-associated protein 5 isoform X1 [Vitis vinifera]
chr13	18639001	18640000	0.294	1	127	0	53	1	-1.89	0	1.89	VIT_213s0084g00080	VIT_213s0084g00080	52.5305	84.4593	20.6016	0.243924	-2.0355	0.0239162	0.825267	Down	1.07413	0.28774	LOC100267765	MAP65-5; At2g38720; T6A23.8	PREDICTED: 65-kDa microtubule-associated protein 5 isoform X1 [Vitis vinifera]
chr13	24009001	24010000	0.25	1	30	0	10	1	-10	0	10	VIT_213s0156g00240	VIT_213s0156g00240	49.3217	88.3425	10.3008	0.116601	-3.10035	0.00162476	0.115931	Down	3.8449	0.422094			hypothetical protein VITISV_033017 [Vitis vinifera]
chr13	24009001	24010000	0.25	1	30	0	10	1	-10	0	10	VIT_213s0156g00245	VIT_213s0156g00245	28.8164	51.4522	6.18049	0.120121	-3.05744	0.012151	0.4976	Down	1.19927	0.1354	LOC100261320		PREDICTED: uncharacterized protein LOC100261320 [Vitis vinifera]
chr14	242001	243000	1	1	10	0	130	2	-1.54	0	1.54	VIT_214s0060g00240	VIT_214s0060g00240	26.0892	5.82478	46.3537	7.95802	2.99241	0.0173515	0.654536	Up	0.104457	0.631115	LOC100240910		PREDICTED: transcription factor MYB86 [Vitis vinifera]
chr14	624001	625000	1	1	21	0	59	1	-1.69	0	1.69	VIT_214s0060g00760	VIT_214s0060g00760	125.277	181.539	69.0155	0.380169	-1.39529	0.0264967	0.875554	Down	4.64329	1.3899	LOC100257918	GOLS2	PREDICTED: galactinol synthase 2 [Vitis vinifera]
chr14	944001	945000	1	1	78	0	97	1	-1.03	0	1.03	VIT_214s0060g01190	VIT_214s0060g01190	293.814	177.656	409.973	2.30768	1.20644	0.00710844	0.339178	Up	6.30449	13.5058	LOC100254544	CHLN; Synonyms=CLN	PREDICTED: nicotianamine synthase [Vitis vinifera]
chr14	1159001	1160000	0.221	1	67	2	75	0	2.99	2.99	0	VIT_214s0060g01470	VIT_214s0060g01470	269.544	398.997	140.091	0.351108	-1.51001	0.00124131	0.0913577	Down	4.89742	1.40339	LOC104881366	CBP60B {ECO:0000303|PubMed:11782485}; At5g57580 {ECO:0000312|Araport:AT5G57580}; MUA2.16 {ECO:0000312|EMBL:BAB08793.1}	unnamed protein product, partial [Vitis vinifera]
chr14	1160001	1161000	1	1	30	0	80	1	-1.25	0	1.25	VIT_214s0060g01470	VIT_214s0060g01470	269.544	398.997	140.091	0.351108	-1.51001	0.00124131	0.0913577	Down	4.89742	1.40339	LOC104881366	CBP60B {ECO:0000303|PubMed:11782485}; At5g57580 {ECO:0000312|Araport:AT5G57580}; MUA2.16 {ECO:0000312|EMBL:BAB08793.1}	unnamed protein product, partial [Vitis vinifera]
chr14	2509001	2510000	0.475	1	66	1	73	0	1.52	1.52	0	VIT_214s0060g02730	VIT_214s0060g02730	93.4114	10.6788	176.144	16.4948	4.04394	7.63011e-07	0.000143398	Up	0.605627	11.1613	GER5	GLP5A; Synonyms=GER2, GERM2, GLP2A, GLP2B; At5g39190; K3K3.6	germin-like protein 5 [Vitis vinifera]
chr14	3162001	3163000	0.441	1	71	0	56	1	-1.79	0	1.79	VIT_214s0128g00570	VIT_214s0128g00570	1475.36	2622.12	328.596	0.125317	-2.99635	2.15828e-23	4.54296e-20	Down	131.24	15.9642	GER7	At5g39120; MXF12.12, MXF12_130	unnamed protein product, partial [Vitis vinifera]
chr14	4813001	4814000	0.196	1	82	0	20	1	-5	0	5	VIT_214s0030g00670	VIT_214s0030g00670	81.9804	132.028	31.9325	0.241861	-2.04775	0.00698865	0.336623	Down	0.843231	0.0797798	LOC100253776	EMB3004; At3g06350; F24P17.18	hypothetical protein VITISV_034026 [Vitis vinifera]
chr14	4815001	4816000	0.385	1	32	0	20	1	-5	0	5	VIT_214s0030g00670	VIT_214s0030g00670	81.9804	132.028	31.9325	0.241861	-2.04775	0.00698865	0.336623	Down	0.843231	0.0797798	LOC100253776	EMB3004; At3g06350; F24P17.18	hypothetical protein VITISV_034026 [Vitis vinifera]
chr14	4821001	4822000	1	1	12	1	10	0	8.33	8.33	0	VIT_214s0030g00670	VIT_214s0030g00670	81.9804	132.028	31.9325	0.241861	-2.04775	0.00698865	0.336623	Down	0.843231	0.0797798	LOC100253776	EMB3004; At3g06350; F24P17.18	hypothetical protein VITISV_034026 [Vitis vinifera]
chr14	5833001	5834000	0.347	1	41	1	77	0	2.44	2.44	0	VIT_214s0030g01300	VIT_214s0030g01300	110.915	44.6566	177.174	3.96747	1.98822	0.00311959	0.189781	Up	0.913058	2.9877	LOC104881423		unnamed protein product, partial [Vitis vinifera]
chr14	6582001	6583000	0.451	1	157	1	191	0	0.64	0.64	0	VIT_214s0030g01700	VIT_214s0030g01700	14.0766	28.1531	0	0	#NAME?	0.0042396	0.233357	Down	0.888481	0	LOC104881414		PREDICTED: uncharacterized protein LOC104881414 [Vitis vinifera]
chr14	6586001	6587000	1	1	10	0	137	1	-0.73	0	0.73	VIT_214s0030g01700	VIT_214s0030g01700	14.0766	28.1531	0	0	#NAME?	0.0042396	0.233357	Down	0.888481	0	LOC104881414		PREDICTED: uncharacterized protein LOC104881414 [Vitis vinifera]
chr14	22548001	22549000	1	1	250	3	64	0	1.2	1.2	0	VIT_214s0083g00460	VIT_214s0083g00460	72.3132	128.145	16.4813	0.128614	-2.95888	0.000418426	0.0369679	Down	1.86178	0.333814	LOC100261704	trpB2; aq_1410	PREDICTED: tryptophan synthase beta chain 1 [Vitis vinifera]
chr14	24530001	24531000	1	1	20	0	193	1	-0.52	0	0.52	VIT_214s0068g00740	VIT_214s0068g00740	59.7522	100.963	18.5415	0.183647	-2.445	0.00521766	0.273881	Down	3.57907	0.622594	LOC100261750		PREDICTED: uncharacterized protein LOC100261750 [Vitis vinifera]
chr14	25741001	25742000	0.000866	0.0349	21	4	94	0	19.05	19.05	0	VIT_214s0068g02150	VIT_214s0068g02150	419.755	624.222	215.287	0.344889	-1.5358	0.000116503	0.0132555	Down	10.3062	3.57659	LOC100267013	At3g27150; MYF5.2	hypothetical protein VITISV_041987 [Vitis vinifera]
chr14	26015001	26016000	1	1	23	1	10	0	4.35	4.35	0	VIT_214s0171g00150	VIT_214s0171g00150	24.9332	43.6858	6.18049	0.141476	-2.82137	0.0267612	0.88291	Down	2.0876	0.304394	LOC100244097	CML19; Os01g0955500, LOC_Os01g72550; B1139B11.19, OsJ_004700	PREDICTED: putative calcium-binding protein CML19 [Vitis vinifera]
chr14	26025001	26026000	0.421	1	91	1	125	0	1.1	1.1	0	VIT_214s0171g00170	VIT_214s0171g00170	30.8172	53.3938	8.24066	0.154337	-2.69584	0.0197748	0.726421	Down	0.457806	0.0541562	LOC100266440		PREDICTED: uncharacterized protein LOC100266440 [Vitis vinifera]
chr14	26026001	26027000	0.568	1	63	0	175	3	-1.71	0	1.71	VIT_214s0171g00170	VIT_214s0171g00170	30.8172	53.3938	8.24066	0.154337	-2.69584	0.0197748	0.726421	Down	0.457806	0.0541562	LOC100266440		PREDICTED: uncharacterized protein LOC100266440 [Vitis vinifera]
chr14	26063001	26064000	1	1	113	1	30	0	0.88	0.88	0	VIT_214s0171g00210	VIT_214s0171g00210	9.78578	0	19.5716	Inf	Inf	0.0169165	0.641123	Up	0	0.274851	LOC100267874	KEG; At5g13530; T6I14.60, T6I14.70	unnamed protein product, partial [Vitis vinifera]
chr14	26064001	26065000	1	1	152	1	65	0	0.66	0.66	0	VIT_214s0171g00210	VIT_214s0171g00210	9.78578	0	19.5716	Inf	Inf	0.0169165	0.641123	Up	0	0.274851	LOC100267874	KEG; At5g13530; T6I14.60, T6I14.70	unnamed protein product, partial [Vitis vinifera]
chr14	28132001	28133000	0.408	1	61	0	42	1	-2.38	0	2.38	VIT_214s0066g01810	VIT_214s0066g01810	547.451	844.593	250.31	0.296367	-1.75454	1.88305e-06	0.00031709	Down	6.73415	1.95975	LOC100249226	SAG101; At5g14930; F2G14.50	PREDICTED: senescence-associated carboxylesterase 101-like [Vitis vinifera]
chr14	28147001	28148000	1	1	12	0	147	1	-0.68	0	0.68	VIT_214s0066g01830	VIT_214s0066g01830	746.746	1165.93	327.566	0.280949	-1.83162	5.47406e-08	1.35557e-05	Down	7.76697	1.93261	LOC100266391	SAG101; At5g14930; F2G14.50	PREDICTED: senescence-associated carboxylesterase 101-like isoform X1 [Vitis vinifera]
chr14	28148001	28149000	0.0217	0.31	369	1	401	9	-1.97	0.27	2.24	VIT_214s0066g01830	VIT_214s0066g01830	746.746	1165.93	327.566	0.280949	-1.83162	5.47406e-08	1.35557e-05	Down	7.76697	1.93261	LOC100266391	SAG101; At5g14930; F2G14.50	PREDICTED: senescence-associated carboxylesterase 101-like isoform X1 [Vitis vinifera]
chr14	28565001	28566000	1	1	30	0	92	1	-1.09	0	1.09	VIT_214s0066g02350	VIT_214s0066g02350	62.2088	104.846	19.5716	0.186669	-2.42144	0.00489691	0.261612	Down	4.05806	0.698968	LOC100243965	GATL9; Synonyms=LGT8; At1g70090; F20P5.18	PREDICTED: probable galacturonosyltransferase-like 10 [Vitis vinifera]
chr14	28779001	28780000	0.476	1	11	2	10	0	18.18	18.18	0	VIT_214s0066g02610	VIT_214s0066g02610	510.387	827.119	193.655	0.234133	-2.0946	4.06883e-08	1.03187e-05	Down	81.9372	17.8163	LOC100261167		PREDICTED: uncharacterized protein LOC100261167 [Vitis vinifera]
chr14	29164001	29165000	1	1	45	0	45	1	-2.22	0	2.22	VIT_214s0108g00400	VIT_214s0108g00400	83.7331	125.233	42.2334	0.337239	-1.56816	0.033775	1	Down	2.37585	0.657063	LOC100264446	At3g28850; T19N8.15	PREDICTED: uncharacterized protein At5g39865 [Vitis vinifera]
chr14	29551001	29552000	1	1	20	0	86	1	-1.16	0	1.16	VIT_214s0108g00890	VIT_214s0108g00890	205.257	311.626	98.8879	0.317329	-1.65595	0.0015149	0.10883	Down	2.90868	0.951085	LOC100242374	GALT1 {ECO:0000303|PubMed:17630273}; Synonyms=B3GALT15 {ECO:0000305|PubMed:18548197}; At1g26810; T24P13.20	PREDICTED: beta-1,3-galactosyltransferase 15-like [Vitis vinifera]
chr14	29555001	29556000	0.369	1	31	1	53	0	3.23	3.23	0	VIT_214s0108g00890	VIT_214s0108g00890	205.257	311.626	98.8879	0.317329	-1.65595	0.0015149	0.10883	Down	2.90868	0.951085	LOC100242374	GALT1 {ECO:0000303|PubMed:17630273}; Synonyms=B3GALT15 {ECO:0000305|PubMed:18548197}; At1g26810; T24P13.20	PREDICTED: beta-1,3-galactosyltransferase 15-like [Vitis vinifera]
chr15	582001	583000	1	1	182	1	112	0	0.55	0.55	0	VIT_215s0024g00400	VIT_215s0024g00400	113.579	176.685	50.474	0.285672	-1.80757	0.00639344	0.319657	Down	1.87978	0.501288	LOC100245433	RGA3; Synonyms=177O13.36, CB3A14.6	PREDICTED: putative disease resistance protein RGA3 isoform X2 [Vitis vinifera]
chr15	586001	587000	1	1	116	0	290	1	-0.34	0	0.34	VIT_215s0024g00400	VIT_215s0024g00400	113.579	176.685	50.474	0.285672	-1.80757	0.00639344	0.319657	Down	1.87978	0.501288	LOC100245433	RGA3; Synonyms=177O13.36, CB3A14.6	PREDICTED: putative disease resistance protein RGA3 isoform X2 [Vitis vinifera]
chr15	586001	587000	1	1	116	0	290	1	-0.34	0	0.34	VIT_215s0024g00410	VIT_215s0024g00410	189.72	365.02	14.4211	0.0395079	-4.66172	7.39497e-13	4.44734e-10	Down	9.54322	0.124348	LOC100242017	PP2A1; At4g19840; T16H5.200	PREDICTED: protein PHLOEM PROTEIN 2-LIKE A1 isoform X2 [Vitis vinifera]
chr15	11384001	11385000	1	1	117	0	123	1	-0.81	0	0.81	VIT_215s0021g01260	VIT_215s0021g01260	106.428	174.743	38.113	0.218109	-2.19688	0.00149462	0.107741	Down	4.30698	0.859534	LOC100242687	AtMg00810 {ECO:0000312|Araport:ATMG00810}; and OrderedLocusNames=At2g07683 {ECO:0000312|Araport:AT2G07683}	PREDICTED: uncharacterized protein LOC100242687 [Vitis vinifera]
chr15	11389001	11390000	0.000134	0.00849	10	9	20	3	75	90	15	VIT_215s0021g01260	VIT_215s0021g01260	106.428	174.743	38.113	0.218109	-2.19688	0.00149462	0.107741	Down	4.30698	0.859534	LOC100242687	AtMg00810 {ECO:0000312|Araport:ATMG00810}; and OrderedLocusNames=At2g07683 {ECO:0000312|Araport:AT2G07683}	PREDICTED: uncharacterized protein LOC100242687 [Vitis vinifera]
chr15	11395001	11396000	0.0116	0.208	20	8	13	0	40	40	0	VIT_215s0021g01260	VIT_215s0021g01260	106.428	174.743	38.113	0.218109	-2.19688	0.00149462	0.107741	Down	4.30698	0.859534	LOC100242687	AtMg00810 {ECO:0000312|Araport:ATMG00810}; and OrderedLocusNames=At2g07683 {ECO:0000312|Araport:AT2G07683}	PREDICTED: uncharacterized protein LOC100242687 [Vitis vinifera]
chr15	13466001	13467000	0.192	1	52	2	66	0	3.85	3.85	0	VIT_215s0021g02470	VIT_215s0021g02470	178.738	252.407	105.068	0.416265	-1.26442	0.0202184	0.741423	Down	3.56051	1.73577	LOC100259848	ephA; Rv3617; LH57_19705 {ECO:0000312|EMBL:AIR16405.1}	PREDICTED: bifunctional epoxide hydrolase 2 [Vitis vinifera]
chr15	16465001	16466000	0.488	1	20	1	21	0	5	5	0	VIT_215s0048g02300	VIT_215s0048g02300	245.93	379.581	112.279	0.295797	-1.75732	0.000322214	0.0296169	Down	9.66902	2.72583	LOC104881856	NTL9 {ECO:0000303|PubMed:17158162}; Synonyms=CBNAC {ECO:0000303|PubMed:17947243}; At4g35580 {ECO:0000312|Araport:AT4G35580}; F8D20.90 {ECO:0000312|EMBL:CAA20028.1}	PREDICTED: NAC domain-containing protein 2-like [Vitis vinifera]
chr15	16468001	16469000	1	1	189	2	10	0	1.06	1.06	0	VIT_215s0048g02300	VIT_215s0048g02300	245.93	379.581	112.279	0.295797	-1.75732	0.000322214	0.0296169	Down	9.66902	2.72583	LOC104881856	NTL9 {ECO:0000303|PubMed:17158162}; Synonyms=CBNAC {ECO:0000303|PubMed:17947243}; At4g35580 {ECO:0000312|Araport:AT4G35580}; F8D20.90 {ECO:0000312|EMBL:CAA20028.1}	PREDICTED: NAC domain-containing protein 2-like [Vitis vinifera]
chr15	17076001	17077000	1	1	11	0	11	1	-9.09	0	9.09	VIT_215s0048g02970	VIT_215s0048g02970	119.771	58.2478	181.294	3.11247	1.63806	0.0109658	0.462973	Up	0.827759	2.69822	LOC104881879		PREDICTED: vegetative cell wall protein gp1-like [Vitis vinifera]
chr15	18192001	18193000	1	1	317	2	100	0	0.63	0.63	0	VIT_215s0046g01140	VIT_215s0046g01140	334.195	575.682	92.7074	0.161039	-2.63452	6.35004e-09	1.88256e-06	Down	8.00113	1.42714	LOC100263619	WRKY53; At4g23810; F9D16.280	unnamed protein product, partial [Vitis vinifera]
chr15	18503001	18504000	0.282	1	44	1	112	0	2.27	2.27	0	VIT_215s0046g01570	VIT_215s0046g01570	885.226	1336.79	433.664	0.324408	-1.62412	3.75472e-07	7.52696e-05	Down	50.0563	15.2466	LOC100251711		PREDICTED: acidic endochitinase [Vitis vinifera]
chr15	18952001	18953000	1	1	79	1	11	0	1.27	1.27	0	VIT_215s0046g02170	VIT_215s0046g02170	336.833	489.281	184.385	0.376848	-1.40795	0.00103216	0.0793983	Down	10.1393	3.56316	LOC100251716	KPHMT1; Synonyms=PANB1; At2g46110; T3F17.24	PREDICTED: 3-methyl-2-oxobutanoate hydroxymethyltransferase 1, mitochondrial [Vitis vinifera]
chr16	600001	601000	0.532	1	88	2	51	0	2.27	2.27	0	VIT_216s0039g01100	VIT_216s0039g01100	44.6455	72.8097	16.4813	0.226361	-2.1433	0.0264626	0.875554	Down	1.00409	0.0551621	LOC100266593	PAL	PREDICTED: phenylalanine ammonia-lyase [Vitis vinifera]
chr16	1797001	1798000	0.312	1	22	0	10	1	-10	0	10	VIT_216s0039g01870	VIT_216s0039g01870	22.8137	45.6274	0	0	#NAME?	0.00027	0.0253716	Down	0.770969	0	LOC100244326	LRK10 {ECO:0000312|EMBL:AAC49629.1}	PREDICTED: G-type lectin S-receptor-like serine/threonine-protein kinase At1g34300 [Vitis vinifera]
chr16	1798001	1799000	0.101	0.751	92	1	23	2	-7.61	1.09	8.7	VIT_216s0039g01870	VIT_216s0039g01870	22.8137	45.6274	0	0	#NAME?	0.00027	0.0253716	Down	0.770969	0	LOC100244326	LRK10 {ECO:0000312|EMBL:AAC49629.1}	PREDICTED: G-type lectin S-receptor-like serine/threonine-protein kinase At1g34300 [Vitis vinifera]
chr16	2174001	2175000	0.312	1	22	0	10	1	-10	0	10	VIT_216s0039g02110	VIT_216s0039g02110	324.617	433.946	215.287	0.496115	-1.01125	0.0188123	0.699612	Down	3.72581	1.70861	LOC100266545	atad-3; F54B3.3	PREDICTED: ATPase family AAA domain-containing protein 3-B [Vitis vinifera]
chr16	4762001	4763000	0.00179	0.0582	235	1	203	11	-4.99	0.43	5.42	VIT_216s0013g00070	VIT_216s0013g00070	309.325	445.596	173.054	0.388365	-1.36451	0.00202465	0.135556	Down	34.2216	12.3403	LOC100852902		PREDICTED: probable non-specific lipid-transfer protein AKCS9 [Vitis vinifera]
chr16	5544001	5545000	1	1	78	1	10	0	1.28	1.28	0	VIT_216s0013g00450	VIT_216s0013g00450	320.782	542.675	98.8879	0.182223	-2.45622	7.2998e-08	1.70726e-05	Down	21.1387	4.05863	LOC109124260		PREDICTED: uncharacterized protein LOC104882052 [Vitis vinifera]
chr16	6676001	6677000	1	1	101	3	32	0	2.97	2.97	0	VIT_216s0013g00950	VIT_216s0013g00950	45.8942	82.5177	9.27074	0.112348	-3.15395	0.00191224	0.130068	Down	2.86819	0.323522	LOC100242632	ERF5; Synonyms=ERF-4, ERF4	PREDICTED: ethylene-responsive transcription factor ERF105 [Vitis vinifera]
chr16	9073001	9074000	2.18e-05	0.00209	30	2	31	18	-51.4	6.67	58.06	VIT_216s0013g01920	VIT_216s0013g01920	415.616	641.697	189.535	0.295366	-1.75943	1.27487e-05	0.00185067	Down	7.77136	2.25537	LOC100242290	PUB35; At4g25160; F13M23.300, F24A6.13	PREDICTED: U-box domain-containing protein 35-like isoform X2 [Vitis vinifera]
chr16	16276001	16277000	1	1	10	0	21	2	-9.52	0	9.52	VIT_216s0100g00780	VIT_216s0100g00780	16.9889	33.9779	0	0	#NAME?	0.00163948	0.116586	Down	1.60968	0.0335017	LOC100245181	GSVIVT00007357001, LOC100250301, VITISV_036852	PREDICTED: stilbene synthase 5 [Vitis vinifera]
chr16	16346001	16347000	6.74e-06	0.00083	114	52	23	0	45.61	45.61	0	VIT_216s0100g00840	VIT_216s0100g00840	16.1071	29.1239	3.09025	0.106107	-3.23641	0.041768	1	Down	1.10184	0.327756	LOC100853820	GSVIVT00005194001, LOC100241891, VITISV_031376	PREDICTED: stilbene synthase 4-like isoform X1 [Vitis vinifera]
chr16	16468001	16469000	0.141	0.889	155	0	212	4	-1.89	0	1.89	VIT_216s0100g00990	VIT_216s0100g00990	38.9801	72.8097	5.15041	0.0707379	-3.82137	0.000835646	0.0663755	Down	2.69298	0.184253	LOC100855299	GSVIVT00004047001, LOC100246143, VITISV_010833; and ORFNames=GSVIVT00008253001, LOC100259169, VITISV_024260	PREDICTED: stilbene synthase 2 [Vitis vinifera]
chr16	16470001	16471000	0.227	1	17	3	16	0	17.65	17.65	0	VIT_216s0100g00990	VIT_216s0100g00990	38.9801	72.8097	5.15041	0.0707379	-3.82137	0.000835646	0.0663755	Down	2.69298	0.184253	LOC100855299	GSVIVT00004047001, LOC100246143, VITISV_010833; and ORFNames=GSVIVT00008253001, LOC100259169, VITISV_024260	PREDICTED: stilbene synthase 2 [Vitis vinifera]
chr16	16504001	16505000	1.16e-09	5.07e-07	62	1	10	9	-88.39	1.61	90	VIT_216s0100g01020	VIT_216s0100g01020	75.0774	138.824	11.3309	0.0816207	-3.61492	2.97901e-05	0.00399396	Down	2.71763	0.213444	LOC100259991	VIT_16s0100g01030	PREDICTED: stilbene synthase 4-like [Vitis vinifera]
chr16	16507001	16508000	0.0319	0.392	37	1	154	25	-13.53	2.7	16.23	VIT_216s0100g01020	VIT_216s0100g01020	75.0774	138.824	11.3309	0.0816207	-3.61492	2.97901e-05	0.00399396	Down	2.71763	0.213444	LOC100259991	VIT_16s0100g01030	PREDICTED: stilbene synthase 4-like [Vitis vinifera]
chr16	16525001	16526000	0.514	1	27	0	41	2	-4.88	0	4.88	VIT_216s0100g01070	VIT_216s0100g01070	54.85	109.7	0	0	#NAME?	4.53348e-08	1.13601e-05	Down	5.64941	0	LOC100253166	VINST1; Synonyms=STS2, VST1; GSVIVT00009226001, LOC100256566, VITISV_035301	PREDICTED: stilbene synthase 1-like [Vitis vinifera]
chr16	16629001	16630000	0.251	1	289	3	260	0	1.04	1.04	0	VIT_216s0100g01140	VIT_216s0100g01140	7.28097	14.5619	0	0	#NAME?	0.0470467	1	Down	1.34512	0	LOC100261661	VINST1; Synonyms=STS2, VST1; GSVIVT00009226001, LOC100256566, VITISV_035301	PREDICTED: stilbene synthase 1 [Vitis vinifera]
chr16	17920001	17921000	0.468	1	74	1	84	0	1.35	1.35	0	VIT_216s0050g00990	VIT_216s0050g00990	16.422	1.94159	30.9025	15.916	3.99241	0.016935	0.641123	Up	0.037582	0.562491	LOC100247332	FRO4; At5g23980; MZF18.140	unnamed protein product, partial [Vitis vinifera]
chr16	17921001	17922000	1	1	154	0	194	1	-0.52	0	0.52	VIT_216s0050g00990	VIT_216s0050g00990	16.422	1.94159	30.9025	15.916	3.99241	0.016935	0.641123	Up	0.037582	0.562491	LOC100247332	FRO4; At5g23980; MZF18.140	unnamed protein product, partial [Vitis vinifera]
chr16	17924001	17925000	1	1	32	0	73	1	-1.37	0	1.37	VIT_216s0050g00990	VIT_216s0050g00990	16.422	1.94159	30.9025	15.916	3.99241	0.016935	0.641123	Up	0.037582	0.562491	LOC100247332	FRO4; At5g23980; MZF18.140	unnamed protein product, partial [Vitis vinifera]
chr16	17926001	17927000	1	1	40	2	10	0	5	5	0	VIT_216s0050g00990	VIT_216s0050g00990	16.422	1.94159	30.9025	15.916	3.99241	0.016935	0.641123	Up	0.037582	0.562491	LOC100247332	FRO4; At5g23980; MZF18.140	unnamed protein product, partial [Vitis vinifera]
chr16	17929001	17930000	0.501	1	184	2	159	0	1.09	1.09	0	VIT_216s0050g00990	VIT_216s0050g00990	16.422	1.94159	30.9025	15.916	3.99241	0.016935	0.641123	Up	0.037582	0.562491	LOC100247332	FRO4; At5g23980; MZF18.140	unnamed protein product, partial [Vitis vinifera]
chr16	17931001	17932000	1	1	206	1	173	0	0.49	0.49	0	VIT_216s0050g00990	VIT_216s0050g00990	16.422	1.94159	30.9025	15.916	3.99241	0.016935	0.641123	Up	0.037582	0.562491	LOC100247332	FRO4; At5g23980; MZF18.140	unnamed protein product, partial [Vitis vinifera]
chr16	18053001	18054000	1.22e-05	0.00133	13	13	10	1	90	100	10	VIT_216s0050g01150	VIT_216s0050g01150	25.815	48.5398	3.09025	0.0636641	-3.97338	0.00392503	0.221064	Down	0.425108	0.025616	LOC100257736	HSP83A	PREDICTED: heat shock protein 83-like [Vitis vinifera]
chr16	18124001	18125000	1	1	31	0	33	1	-3.03	0	3.03	VIT_216s0050g01240	VIT_216s0050g01240	3222.15	4535.56	1908.74	0.420839	-1.24866	6.25128e-07	0.000121836	Down	203.48	87.5443	LOC100252599	HIPP39 {ECO:0000303|PubMed:21072340, ECO:0000303|PubMed:23368984}; At1g01490 {ECO:0000312|Araport:AT1G01490}; F22L4.5 {ECO:0000312|EMBL:AAF81309.1}	PREDICTED: heavy metal-associated isoprenylated plant protein 26 [Vitis vinifera]
chr16	18125001	18126000	1	1	193	1	66	0	0.52	0.52	0	VIT_216s0050g01240	VIT_216s0050g01240	3222.15	4535.56	1908.74	0.420839	-1.24866	6.25128e-07	0.000121836	Down	203.48	87.5443	LOC100252599	HIPP39 {ECO:0000303|PubMed:21072340, ECO:0000303|PubMed:23368984}; At1g01490 {ECO:0000312|Araport:AT1G01490}; F22L4.5 {ECO:0000312|EMBL:AAF81309.1}	PREDICTED: heavy metal-associated isoprenylated plant protein 26 [Vitis vinifera]
chr16	18632001	18633000	1	1	89	0	98	1	-1.02	0	1.02	VIT_216s0050g01690	VIT_216s0050g01690	194.756	284.443	105.068	0.369382	-1.43681	0.00660532	0.327502	Down	8.34684	2.83019	LOC100257702	LRK10 {ECO:0000312|EMBL:AAC49629.1}	PREDICTED: glycerophosphodiester phosphodiesterase protein kinase domain-containing GDPDL2-like isoform X2 [Vitis vinifera]
chr16	18634001	18635000	5.23e-10	2.44e-07	66	27	150	8	35.58	40.91	5.33	VIT_216s0050g01690	VIT_216s0050g01690	194.756	284.443	105.068	0.369382	-1.43681	0.00660532	0.327502	Down	8.34684	2.83019	LOC100257702	LRK10 {ECO:0000312|EMBL:AAC49629.1}	PREDICTED: glycerophosphodiester phosphodiesterase protein kinase domain-containing GDPDL2-like isoform X2 [Vitis vinifera]
chr16	19247001	19248000	0.301	1	200	0	86	1	-1.16	0	1.16	VIT_216s0050g02330	VIT_216s0050g02330	153.927	255.32	52.5342	0.205759	-2.28098	0.000147036	0.0157104	Down	2.21206	0.451405	LOC100267290	MAA3; At4g15570; dl3825w	PREDICTED: helicase sen1-like isoform X2 [Vitis vinifera]
chr16	19248001	19249000	1	1	94	1	10	0	1.06	1.06	0	VIT_216s0050g02330	VIT_216s0050g02330	153.927	255.32	52.5342	0.205759	-2.28098	0.000147036	0.0157104	Down	2.21206	0.451405	LOC100267290	MAA3; At4g15570; dl3825w	PREDICTED: helicase sen1-like isoform X2 [Vitis vinifera]
chr16	19250001	19251000	1	1	40	0	253	1	-0.4	0	0.4	VIT_216s0050g02330	VIT_216s0050g02330	153.927	255.32	52.5342	0.205759	-2.28098	0.000147036	0.0157104	Down	2.21206	0.451405	LOC100267290	MAA3; At4g15570; dl3825w	PREDICTED: helicase sen1-like isoform X2 [Vitis vinifera]
chr16	19254001	19255000	1	1	161	1	47	0	0.62	0.62	0	VIT_216s0050g02330	VIT_216s0050g02330	153.927	255.32	52.5342	0.205759	-2.28098	0.000147036	0.0157104	Down	2.21206	0.451405	LOC100267290	MAA3; At4g15570; dl3825w	PREDICTED: helicase sen1-like isoform X2 [Vitis vinifera]
chr16	19254001	19255000	1	1	161	1	47	0	0.62	0.62	0	VIT_216s0050g02340	VIT_216s0050g02340	294.496	425.209	163.783	0.385182	-1.37639	0.00224297	0.145717	Down	5.30247	1.86647	LOC100262126	MAA3; At4g15570; dl3825w	PREDICTED: uncharacterized protein LOC100262126 [Vitis vinifera]
chr16	19257001	19258000	0.218	1	100	0	88	2	-2.27	0	2.27	VIT_216s0050g02340	VIT_216s0050g02340	294.496	425.209	163.783	0.385182	-1.37639	0.00224297	0.145717	Down	5.30247	1.86647	LOC100262126	MAA3; At4g15570; dl3825w	PREDICTED: uncharacterized protein LOC100262126 [Vitis vinifera]
chr16	20063001	20064000	1	1	20	0	24	1	-4.17	0	4.17	VIT_216s0148g00140	VIT_216s0148g00140	59.415	95.1381	23.6919	0.249026	-2.00563	0.0193896	0.714768	Down	3.89191	0.669429	LOC100252559	LRK10 {ECO:0000312|EMBL:AAC49629.1}	PREDICTED: probable receptor-like protein kinase At5g39020, partial [Vitis vinifera]
chr16	21188001	21189000	0.576	1	40	0	139	4	-2.88	0	2.88	VIT_216s0098g00860	VIT_216s0098g00860	3727.87	5043.29	2412.45	0.478349	-1.06386	1.59338e-05	0.00225095	Down	133.05	60.0761	LOC100854106	DMR6 {ECO:0000303|PubMed:15986928}; At5g24530 {ECO:0000312|Araport:AT5G24530}; K18P6.6 {ECO:0000312|EMBL:AAK62420.1}	uncharacterized protein LOC100854106 [Vitis vinifera]
chr16	21271001	21272000	0.494	1	44	2	42	0	4.55	4.55	0	VIT_216s0098g00970	VIT_216s0098g00970	689.355	1105.74	272.972	0.246868	-2.01819	6.17484e-09	1.85677e-06	Down	5.57701	1.24166	LOC104877361	SBT3.6 {ECO:0000303|PubMed:16193095}; At4g10550 {ECO:0000312|Araport:AT4G10550}; F3H7.3 {ECO:0000312|EMBL:AAD03431.1}, T4F9.10 {ECO:0000312|EMBL:CAB40021.1}	unnamed protein product, partial [Vitis vinifera]
chr16	21278001	21279000	1	1	51	0	201	2	-1	0	1	VIT_216s0098g00970	VIT_216s0098g00970	689.355	1105.74	272.972	0.246868	-2.01819	6.17484e-09	1.85677e-06	Down	5.57701	1.24166	LOC104877361	SBT3.6 {ECO:0000303|PubMed:16193095}; At4g10550 {ECO:0000312|Araport:AT4G10550}; F3H7.3 {ECO:0000312|EMBL:AAD03431.1}, T4F9.10 {ECO:0000312|EMBL:CAB40021.1}	unnamed protein product, partial [Vitis vinifera]
chr16	21279001	21280000	1	1	46	2	21	0	4.35	4.35	0	VIT_216s0098g00970	VIT_216s0098g00970	689.355	1105.74	272.972	0.246868	-2.01819	6.17484e-09	1.85677e-06	Down	5.57701	1.24166	LOC104877361	SBT3.6 {ECO:0000303|PubMed:16193095}; At4g10550 {ECO:0000312|Araport:AT4G10550}; F3H7.3 {ECO:0000312|EMBL:AAD03431.1}, T4F9.10 {ECO:0000312|EMBL:CAB40021.1}	unnamed protein product, partial [Vitis vinifera]
chr16	21280001	21281000	1	1	153	1	99	0	0.65	0.65	0	VIT_216s0098g00970	VIT_216s0098g00970	689.355	1105.74	272.972	0.246868	-2.01819	6.17484e-09	1.85677e-06	Down	5.57701	1.24166	LOC104877361	SBT3.6 {ECO:0000303|PubMed:16193095}; At4g10550 {ECO:0000312|Araport:AT4G10550}; F3H7.3 {ECO:0000312|EMBL:AAD03431.1}, T4F9.10 {ECO:0000312|EMBL:CAB40021.1}	unnamed protein product, partial [Vitis vinifera]
chr16	21281001	21282000	1	1	69	0	78	1	-1.28	0	1.28	VIT_216s0098g00970	VIT_216s0098g00970	689.355	1105.74	272.972	0.246868	-2.01819	6.17484e-09	1.85677e-06	Down	5.57701	1.24166	LOC104877361	SBT3.6 {ECO:0000303|PubMed:16193095}; At4g10550 {ECO:0000312|Araport:AT4G10550}; F3H7.3 {ECO:0000312|EMBL:AAD03431.1}, T4F9.10 {ECO:0000312|EMBL:CAB40021.1}	unnamed protein product, partial [Vitis vinifera]
chr16	21282001	21283000	1	1	30	0	102	3	-2.94	0	2.94	VIT_216s0098g00970	VIT_216s0098g00970	689.355	1105.74	272.972	0.246868	-2.01819	6.17484e-09	1.85677e-06	Down	5.57701	1.24166	LOC104877361	SBT3.6 {ECO:0000303|PubMed:16193095}; At4g10550 {ECO:0000312|Araport:AT4G10550}; F3H7.3 {ECO:0000312|EMBL:AAD03431.1}, T4F9.10 {ECO:0000312|EMBL:CAB40021.1}	unnamed protein product, partial [Vitis vinifera]
chr16	21420001	21421000	1	1	21	0	119	1	-0.84	0	0.84	VIT_216s0098g01160	VIT_216s0098g01160	773.495	1251.36	295.634	0.23625	-2.08161	6.63384e-10	2.28911e-07	Down	13.1116	2.90157	LOC100264034	SBT3.3 {ECO:0000303|PubMed:16193095}; At1g32960 {ECO:0000312|Araport:AT1G32960}; F9L11.13 {ECO:0000312|EMBL:AAF31276.1}	PREDICTED: subtilisin-like protease SBT3.5 [Vitis vinifera]
chr16	21422001	21423000	0.34	1	487	5	161	0	1.03	1.03	0	VIT_216s0098g01160	VIT_216s0098g01160	773.495	1251.36	295.634	0.23625	-2.08161	6.63384e-10	2.28911e-07	Down	13.1116	2.90157	LOC100264034	SBT3.3 {ECO:0000303|PubMed:16193095}; At1g32960 {ECO:0000312|Araport:AT1G32960}; F9L11.13 {ECO:0000312|EMBL:AAF31276.1}	PREDICTED: subtilisin-like protease SBT3.5 [Vitis vinifera]
chr17	3249001	3250000	1	1	75	1	34	0	1.33	1.33	0	VIT_217s0000g03370	VIT_217s0000g03370	78.7827	152.415	5.15041	0.033792	-4.88717	2.36743e-07	5.03354e-05	Down	1.79983	0.0742089	LOC100259493	SARD1 {ECO:0000303|PubMed:20921422}; At1g73805 {ECO:0000312|Araport:AT1G73805}; F25P22.22 {ECO:0000312|EMBL:AAG52065.1}	PREDICTED: uncharacterized protein LOC100259493 [Vitis vinifera]
chr17	3454001	3455000	1	1	23	0	106	1	-0.94	0	0.94	VIT_217s0000g03560	VIT_217s0000g03560	37.5535	68.9266	6.18049	0.0896678	-3.47927	0.00206287	0.137409	Down	1.28224	0.045235	LOC100242243	MYB62 {ECO:0000303|PubMed:9839469}; At1g68320 {ECO:0000312|Araport:AT1G68320}; T22E19.5 {ECO:0000312|EMBL:AAG52612.1}	PREDICTED: transcription factor MYB108 [Vitis vinifera]
chr17	3717001	3718000	0.46	1	74	0	63	1	-1.59	0	1.59	VIT_217s0000g03765	VIT_217s0000g03765	291.761	413.559	169.964	0.410977	-1.28287	0.0044257	0.240715	Down	6.45357	2.56831	LOC104882341	ERF118; At1g68550; T26J14.12	hypothetical protein VITISV_015325 [Vitis vinifera]
chr17	6147001	6148000	0.183	0.988	123	2	164	0	1.63	1.63	0	VIT_217s0000g05640	VIT_217s0000g05640	146.742	68.9266	224.558	3.25793	1.70396	0.00424608	0.233357	Up	0.711641	2.74539	LOC100255336	NPF4.6; Synonyms=AIT1, NRT1.2, NTL1, NTR1:2; At1g69850; T17F3.12	PREDICTED: protein NRT1/ PTR FAMILY 4.6 [Vitis vinifera]
chr17	7343001	7344000	1	1	196	3	33	0	1.53	1.53	0	VIT_217s0000g06770	VIT_217s0000g06770	13.1354	25.2407	1.03008	0.0408103	-4.61492	0.0209921	0.754031	Down	0.513987	0.0196925	LOC100256967	PCMP-H12; Synonyms=OTP82 {ECO:0000303|PubMed:19845878}; At1g08070; T6D22.15	PREDICTED: pentatricopeptide repeat-containing protein At2g02980 [Vitis vinifera]
chr17	7344001	7345000	0.00144	0.0504	20	3	149	0	15	15	0	VIT_217s0000g06770	VIT_217s0000g06770	13.1354	25.2407	1.03008	0.0408103	-4.61492	0.0209921	0.754031	Down	0.513987	0.0196925	LOC100256967	PCMP-H12; Synonyms=OTP82 {ECO:0000303|PubMed:19845878}; At1g08070; T6D22.15	PREDICTED: pentatricopeptide repeat-containing protein At2g02980 [Vitis vinifera]
chr17	7345001	7346000	1	1	92	0	96	1	-1.04	0	1.04	VIT_217s0000g06770	VIT_217s0000g06770	13.1354	25.2407	1.03008	0.0408103	-4.61492	0.0209921	0.754031	Down	0.513987	0.0196925	LOC100256967	PCMP-H12; Synonyms=OTP82 {ECO:0000303|PubMed:19845878}; At1g08070; T6D22.15	PREDICTED: pentatricopeptide repeat-containing protein At2g02980 [Vitis vinifera]
chr17	7346001	7347000	1	1	39	1	23	0	2.56	2.56	0	VIT_217s0000g06770	VIT_217s0000g06770	13.1354	25.2407	1.03008	0.0408103	-4.61492	0.0209921	0.754031	Down	0.513987	0.0196925	LOC100256967	PCMP-H12; Synonyms=OTP82 {ECO:0000303|PubMed:19845878}; At1g08070; T6D22.15	PREDICTED: pentatricopeptide repeat-containing protein At2g02980 [Vitis vinifera]
chr17	8266001	8267000	0.54	1	10	0	20	2	-10	0	10	VIT_217s0000g07375	VIT_217s0000g07375	87.7756	144.649	30.9025	0.213638	-2.22676	0.0028355	0.173501	Down	3.11712	0.688202	LOC100257078	EDS1 {ECO:0000312|EMBL:AAD20950.1}	PREDICTED: lipase-like PAD4 [Vitis vinifera]
chr17	8366001	8367000	0.323	1	21	0	10	1	-10	0	10	VIT_217s0000g07420	VIT_217s0000g07420	82.9624	150.473	15.4512	0.102684	-3.28372	5.34938e-05	0.00650862	Down	2.63546	0.285228	LOC100250236	EDS1 {ECO:0000303|PubMed:10077677}; Synonyms=EDS1-90 {ECO:0000303|PubMed:22072959}, EDS1A {ECO:0000303|PubMed:16040633}; At3g48090 {ECO:0000312|Araport:AT3G48090}; T17F15.40 {ECO:0000312|EMBL:CAB41130.1}	PREDICTED: lipase-like PAD4 [Vitis vinifera]
chr17	11535001	11536000	1	1	116	1	96	0	0.86	0.86	0	VIT_217s0000g09710	VIT_217s0000g09710	556.248	860.126	252.37	0.293411	-1.76901	1.39219e-06	0.000248341	Down	15.4715	4.22909	LOC100248492	SOBIR1; Synonyms=EVR; At2g31880; F20M17.8	PREDICTED: leucine-rich repeat receptor-like serine/threonine/tyrosine-protein kinase SOBIR1 [Vitis vinifera]
chr17	11536001	11537000	1	1	15	0	129	1	-0.78	0	0.78	VIT_217s0000g09710	VIT_217s0000g09710	556.248	860.126	252.37	0.293411	-1.76901	1.39219e-06	0.000248341	Down	15.4715	4.22909	LOC100248492	SOBIR1; Synonyms=EVR; At2g31880; F20M17.8	PREDICTED: leucine-rich repeat receptor-like serine/threonine/tyrosine-protein kinase SOBIR1 [Vitis vinifera]
chr17	16332001	16333000	1	1	196	1	157	0	0.51	0.51	0	VIT_217s0053g00810	VIT_217s0053g00810	73.9065	109.7	38.113	0.34743	-1.52521	0.0487618	1	Down	4.98357	1.7172	LOC100246030	CNGC20; Synonyms=CNBT1; At3g17700; MKP6.28	PREDICTED: probable cyclic nucleotide-gated ion channel 20, chloroplastic [Vitis vinifera]
chr17	16333001	16334000	0.259	1	20	1	191	2	3.95	5	1.05	VIT_217s0053g00810	VIT_217s0053g00810	73.9065	109.7	38.113	0.34743	-1.52521	0.0487618	1	Down	4.98357	1.7172	LOC100246030	CNGC20; Synonyms=CNBT1; At3g17700; MKP6.28	PREDICTED: probable cyclic nucleotide-gated ion channel 20, chloroplastic [Vitis vinifera]
chr17	16341001	16342000	0.00657	0.143	84	5	10	4	-34.05	5.95	40	VIT_217s0053g00810	VIT_217s0053g00810	73.9065	109.7	38.113	0.34743	-1.52521	0.0487618	1	Down	4.98357	1.7172	LOC100246030	CNGC20; Synonyms=CNBT1; At3g17700; MKP6.28	PREDICTED: probable cyclic nucleotide-gated ion channel 20, chloroplastic [Vitis vinifera]
chr17	16345001	16346000	1	1	133	1	50	0	0.75	0.75	0	VIT_217s0053g00810	VIT_217s0053g00810	73.9065	109.7	38.113	0.34743	-1.52521	0.0487618	1	Down	4.98357	1.7172	LOC100246030	CNGC20; Synonyms=CNBT1; At3g17700; MKP6.28	PREDICTED: probable cyclic nucleotide-gated ion channel 20, chloroplastic [Vitis vinifera]
chr17	16396001	16397000	0.491	1	20	0	23	2	-8.7	0	8.7	VIT_217s0053g00850	VIT_217s0053g00850	87.6459	132.028	43.2634	0.327683	-1.60963	0.0268154	0.883313	Down	3.49406	1.24772	LOC100246030	CNGC20; Synonyms=CNBT1; At3g17700; MKP6.28	PREDICTED: probable cyclic nucleotide-gated ion channel 20, chloroplastic isoform X1 [Vitis vinifera]
chr17	16399001	16400000	1	1	10	0	75	3	-4	0	4	VIT_217s0053g00850	VIT_217s0053g00850	87.6459	132.028	43.2634	0.327683	-1.60963	0.0268154	0.883313	Down	3.49406	1.24772	LOC100246030	CNGC20; Synonyms=CNBT1; At3g17700; MKP6.28	PREDICTED: probable cyclic nucleotide-gated ion channel 20, chloroplastic isoform X1 [Vitis vinifera]
chr17	16405001	16406000	0.509	1	97	2	71	0	2.06	2.06	0	VIT_217s0053g00850	VIT_217s0053g00850	87.6459	132.028	43.2634	0.327683	-1.60963	0.0268154	0.883313	Down	3.49406	1.24772	LOC100246030	CNGC20; Synonyms=CNBT1; At3g17700; MKP6.28	PREDICTED: probable cyclic nucleotide-gated ion channel 20, chloroplastic isoform X1 [Vitis vinifera]
chr17	16409001	16410000	1	1	108	1	42	0	0.93	0.93	0	VIT_217s0053g00850	VIT_217s0053g00850	87.6459	132.028	43.2634	0.327683	-1.60963	0.0268154	0.883313	Down	3.49406	1.24772	LOC100246030	CNGC20; Synonyms=CNBT1; At3g17700; MKP6.28	PREDICTED: probable cyclic nucleotide-gated ion channel 20, chloroplastic isoform X1 [Vitis vinifera]
chr17	16421001	16422000	1	1	32	1	20	0	3.12	3.12	0	VIT_217s0053g00850	VIT_217s0053g00850	87.6459	132.028	43.2634	0.327683	-1.60963	0.0268154	0.883313	Down	3.49406	1.24772	LOC100246030	CNGC20; Synonyms=CNBT1; At3g17700; MKP6.28	PREDICTED: probable cyclic nucleotide-gated ion channel 20, chloroplastic isoform X1 [Vitis vinifera]
chr17	16435001	16436000	0.162	0.942	130	2	192	0	1.54	1.54	0	VIT_217s0053g00850	VIT_217s0053g00850	87.6459	132.028	43.2634	0.327683	-1.60963	0.0268154	0.883313	Down	3.49406	1.24772	LOC100246030	CNGC20; Synonyms=CNBT1; At3g17700; MKP6.28	PREDICTED: probable cyclic nucleotide-gated ion channel 20, chloroplastic isoform X1 [Vitis vinifera]
chr17	16437001	16438000	0.327	1	43	8	10	0	18.6	18.6	0	VIT_217s0053g00850	VIT_217s0053g00850	87.6459	132.028	43.2634	0.327683	-1.60963	0.0268154	0.883313	Down	3.49406	1.24772	LOC100246030	CNGC20; Synonyms=CNBT1; At3g17700; MKP6.28	PREDICTED: probable cyclic nucleotide-gated ion channel 20, chloroplastic isoform X1 [Vitis vinifera]
chr17	16451001	16452000	0.125	0.835	65	2	118	0	3.08	3.08	0	VIT_217s0053g00850	VIT_217s0053g00850	87.6459	132.028	43.2634	0.327683	-1.60963	0.0268154	0.883313	Down	3.49406	1.24772	LOC100246030	CNGC20; Synonyms=CNBT1; At3g17700; MKP6.28	PREDICTED: probable cyclic nucleotide-gated ion channel 20, chloroplastic isoform X1 [Vitis vinifera]
chr18	1280001	1281000	0.184	0.991	187	1	20	1	-4.47	0.53	5	VIT_218s0001g00320	VIT_218s0001g00320	10.6788	21.3575	0	0	#NAME?	0.0136206	0.541965	Down	0.226512	0	LOC100243824	AATL1; At1g47670; F16N3.4	unnamed protein product, partial [Vitis vinifera]
chr18	1281001	1282000	0.259	1	155	0	198	3	-1.52	0	1.52	VIT_218s0001g00320	VIT_218s0001g00320	10.6788	21.3575	0	0	#NAME?	0.0136206	0.541965	Down	0.226512	0	LOC100243824	AATL1; At1g47670; F16N3.4	unnamed protein product, partial [Vitis vinifera]
chr18	1538001	1539000	0.163	0.943	63	4	86	1	5.19	6.35	1.16	VIT_218s0001g00770	VIT_218s0001g00770	11.6792	22.3283	1.03008	0.0461334	-4.43804	0.032751	0.981515	Down	0.123353	0.0101796	LOC100241982	PLDDELTA {ECO:0000303|PubMed:11891260}; At4g35790 {ECO:0000312|Araport:AT4G35790}; F4B14.60 {ECO:0000312|EMBL:CAA21465.1}	PREDICTED: phospholipase D delta-like [Vitis vinifera]
chr18	1542001	1543000	1	1	113	1	38	0	0.88	0.88	0	VIT_218s0001g00770	VIT_218s0001g00770	11.6792	22.3283	1.03008	0.0461334	-4.43804	0.032751	0.981515	Down	0.123353	0.0101796	LOC100241982	PLDDELTA {ECO:0000303|PubMed:11891260}; At4g35790 {ECO:0000312|Araport:AT4G35790}; F4B14.60 {ECO:0000312|EMBL:CAA21465.1}	PREDICTED: phospholipase D delta-like [Vitis vinifera]
chr18	2416001	2417000	1	1	44	0	289	4	-1.38	0	1.38	VIT_218s0001g01960	VIT_218s0001g01960	9.22257	18.4451	0	0	#NAME?	0.0229701	0.801819	Down	0.633513	0	LOC100264391	At1g11050; T19D16.6	PREDICTED: probable receptor-like protein kinase At1g11050 [Vitis vinifera]
chr18	2464001	2465000	0.18	0.984	20	1	91	0	5	5	0	VIT_218s0001g02030	VIT_218s0001g02030	70.9052	106.788	35.0228	0.327967	-1.60838	0.0413874	1	Down	3.26133	1.01483	LOC100854416	TPP1; At2g30440; T6B20.20	PREDICTED: thylakoidal processing peptidase 1, chloroplastic-like [Vitis vinifera]
chr18	2503001	2504000	0.355	1	20	0	11	1	-9.09	0	9.09	VIT_218s0001g02100	VIT_218s0001g02100	627.287	895.074	359.499	0.401641	-1.31602	0.00015703	0.0165266	Down	53.8924	19.3835	LOC104882462		PREDICTED: uncharacterized protein LOC104882462 [Vitis vinifera]
chr18	3581001	3582000	0.312	1	10	1	22	0	10	10	0	VIT_218s0001g03910	VIT_218s0001g03910	155.905	224.254	87.557	0.390437	-1.35684	0.0185249	0.690142	Down	2.05452	0.774534	LOC100264320		nitrate reductase [NADH]-like [Vitis vinifera]
chr18	3929001	3930000	1	1	191	2	87	0	1.05	1.05	0	VIT_218s0001g04640	VIT_218s0001g04640	42.7151	85.4301	0	0	#NAME?	1.02686e-06	0.000189601	Down	9.1996	0	LOC100267796
chr18	4061001	4062000	0.131	0.856	22	1	146	0	4.55	4.55	0	VIT_218s0001g04910	VIT_218s0001g04910	163.483	229.108	97.8578	0.427125	-1.22727	0.0294085	0.930856	Down	4.70617	1.95377	LOC100233023	SULTR1;3; At1g22150; F2E2.22	PREDICTED: sulfate transporter isoform X1 [Vitis vinifera]
chr18	4062001	4063000	1	1	30	1	21	0	3.33	3.33	0	VIT_218s0001g04910	VIT_218s0001g04910	163.483	229.108	97.8578	0.427125	-1.22727	0.0294085	0.930856	Down	4.70617	1.95377	LOC100233023	SULTR1;3; At1g22150; F2E2.22	PREDICTED: sulfate transporter isoform X1 [Vitis vinifera]
chr18	4141001	4142000	0.32	1	24	1	51	0	4.17	4.17	0	VIT_218s0001g05060	VIT_218s0001g05060	94.7082	136.882	52.5342	0.383791	-1.38161	0.0486508	1	Down	2.19198	1.05857	LOC100245371	gpmA {ECO:0000255|HAMAP-Rule:MF_01039}; Synonyms=pgmA; pc0161	PREDICTED: phosphoglycerate mutase [Vitis vinifera]
chr18	4145001	4146000	0.333	1	102	1	204	0	0.98	0.98	0	VIT_218s0001g05060	VIT_218s0001g05060	94.7082	136.882	52.5342	0.383791	-1.38161	0.0486508	1	Down	2.19198	1.05857	LOC100245371	gpmA {ECO:0000255|HAMAP-Rule:MF_01039}; Synonyms=pgmA; pc0161	PREDICTED: phosphoglycerate mutase [Vitis vinifera]
chr18	4147001	4148000	0.288	1	79	0	32	1	-3.12	0	3.12	VIT_218s0001g05060	VIT_218s0001g05060	94.7082	136.882	52.5342	0.383791	-1.38161	0.0486508	1	Down	2.19198	1.05857	LOC100245371	gpmA {ECO:0000255|HAMAP-Rule:MF_01039}; Synonyms=pgmA; pc0161	PREDICTED: phosphoglycerate mutase [Vitis vinifera]
chr18	4961001	4962000	0.000714	0.0301	10	10	10	2	80	100	20	VIT_218s0001g06560	VIT_218s0001g06560	2686.16	4108.41	1263.91	0.30764	-1.70069	4.82395e-11	2.20737e-08	Down	350.009	101.551	LOC100266097
chr18	5103001	5104000	0.583	1	91	5	20	0	5.49	5.49	0	VIT_218s0001g06850	VIT_218s0001g06850	14.1062	27.1823	1.03008	0.0378953	-4.72184	0.0156729	0.60755	Down	0.332891	0.0132535	LOC100257440	PNC1	PREDICTED: cationic peroxidase 1 [Vitis vinifera]
chr18	5104001	5105000	0.388	1	40	1	63	0	2.5	2.5	0	VIT_218s0001g06850	VIT_218s0001g06850	14.1062	27.1823	1.03008	0.0378953	-4.72184	0.0156729	0.60755	Down	0.332891	0.0132535	LOC100257440	PNC1	PREDICTED: cationic peroxidase 1 [Vitis vinifera]
chr18	5108001	5109000	1	1	11	0	167	2	-1.2	0	1.2	VIT_218s0001g06850	VIT_218s0001g06850	14.1062	27.1823	1.03008	0.0378953	-4.72184	0.0156729	0.60755	Down	0.332891	0.0132535	LOC100257440	PNC1	PREDICTED: cationic peroxidase 1 [Vitis vinifera]
chr18	5123001	5124000	1	1	20	0	82	1	-1.22	0	1.22	VIT_218s0001g06850	VIT_218s0001g06850	14.1062	27.1823	1.03008	0.0378953	-4.72184	0.0156729	0.60755	Down	0.332891	0.0132535	LOC100257440	PNC1	PREDICTED: cationic peroxidase 1 [Vitis vinifera]
chr18	5652001	5653000	1	1	135	1	118	0	0.74	0.74	0	VIT_218s0001g07380	VIT_218s0001g07380	998.138	1332.9	663.373	0.49769	-1.00668	0.000964054	0.075157	Down	25.1123	11.749	LOC100255831	AHL17 {ECO:0000303|PubMed:15604740}; At5g49700 {ECO:0000312|Araport:AT5G49700}; K2I5.6 {ECO:0000312|EMBL:BAA98158.1}	hypothetical protein VITISV_003550 [Vitis vinifera]
chr18	5655001	5656000	1	1	30	0	74	1	-1.35	0	1.35	VIT_218s0001g07380	VIT_218s0001g07380	998.138	1332.9	663.373	0.49769	-1.00668	0.000964054	0.075157	Down	25.1123	11.749	LOC100255831	AHL17 {ECO:0000303|PubMed:15604740}; At5g49700 {ECO:0000312|Araport:AT5G49700}; K2I5.6 {ECO:0000312|EMBL:BAA98158.1}	hypothetical protein VITISV_003550 [Vitis vinifera]
chr18	6997001	6998000	0.308	1	208	1	42	1	-1.9	0.48	2.38	VIT_218s0001g08550	VIT_218s0001g08550	44.1898	70.8682	17.5114	0.247098	-2.01684	0.0363974	1	Down	0.474228	0.253501	LOC100254037		PREDICTED: squalene monooxygenase [Vitis vinifera]
chr18	7257001	7258000	0.0921	0.714	11	2	46	1	16.01	18.18	2.17	VIT_218s0001g08760	VIT_218s0001g08760	58.9703	109.7	8.24066	0.0751199	-3.73466	0.000102307	0.0117675	Down	5.07046	0.348478	LOC100245416	PSK3; Synonyms=PSK4; At3g49780; T16K5.130	PREDICTED: phytosulfokines 3 [Vitis vinifera]
chr18	7309001	7310000	1	1	61	1	36	0	1.64	1.64	0	VIT_218s0001g08810	VIT_218s0001g08810	41.0995	70.8682	11.3309	0.159887	-2.64487	0.00996273	0.435074	Down	3.82874	0.574514	LOC100267722		PREDICTED: uncharacterized protein LOC100267722 [Vitis vinifera]
chr18	8531001	8532000	0.393	1	57	1	88	0	1.75	1.75	0	VIT_218s0001g10180	VIT_218s0001g10180	67.0628	114.554	19.5716	0.17085	-2.5492	0.00246342	0.155565	Down	2.81067	0.405512	LOC100260914	At3g50280; F11C1.120	PREDICTED: uncharacterized acetyltransferase At3g50280-like [Vitis vinifera]
chr18	9011001	9012000	1	1	10	0	20	1	-5	0	5	VIT_218s0001g10690	VIT_218s0001g10690	151.229	208.721	93.7375	0.449103	-1.15488	0.0465282	1	Down	4.50951	1.86864	LOC100243702	BKI1; At5g42750; MJB21.13	PREDICTED: BRI1 kinase inhibitor 1 [Vitis vinifera]
chr18	9548001	9549000	0.4	1	20	1	30	0	5	5	0	VIT_218s0001g11240	VIT_218s0001g11240	127.519	226.196	28.8423	0.12751	-2.97131	1.01562e-05	0.00155746	Down	2.87974	0.342328	LOC100257467	MAPKKK5 {ECO:0000303|PubMed:27679653}; Synonyms=MAP3KG {ECO:0000303|PubMed:10095117}; At5g66850 {ECO:0000312|Araport:AT5G66850}; MUD21.11 {ECO:0000312|EMBL:BAB08627.1}	PREDICTED: mitogen-activated protein kinase kinase kinase YODA-like isoform X2 [Vitis vinifera]
chr18	10072001	10073000	1	1	111	1	86	0	0.9	0.9	0	VIT_218s0001g11800	VIT_218s0001g11800	45.1902	71.8389	18.5415	0.258098	-1.95401	0.040263	1	Down	0.62724	0.180295	LOC100243714	BLH2; Synonyms=SAW1; At4g36870; AP22.90, C7A10.490	PREDICTED: BEL1-like homeodomain protein 4 [Vitis vinifera]
chr18	10075001	10076000	1	1	198	1	86	0	0.51	0.51	0	VIT_218s0001g11800	VIT_218s0001g11800	45.1902	71.8389	18.5415	0.258098	-1.95401	0.040263	1	Down	0.62724	0.180295	LOC100243714	BLH2; Synonyms=SAW1; At4g36870; AP22.90, C7A10.490	PREDICTED: BEL1-like homeodomain protein 4 [Vitis vinifera]
chr18	10101001	10102000	1	1	12	0	78	1	-1.28	0	1.28	VIT_218s0001g11830	VIT_218s0001g11830	85.8451	157.269	14.4211	0.0916973	-3.44698	2.16176e-05	0.00297404	Down	9.03628	0.697442	LOC100253943	CML41; At3g50770; F18B3.50	PREDICTED: probable calcium-binding protein CML41 [Vitis vinifera]
chr18	10103001	10104000	1.01e-05	0.00115	55	43	12	1	69.85	78.18	8.33	VIT_218s0001g11830	VIT_218s0001g11830	85.8451	157.269	14.4211	0.0916973	-3.44698	2.16176e-05	0.00297404	Down	9.03628	0.697442	LOC100253943	CML41; At3g50770; F18B3.50	PREDICTED: probable calcium-binding protein CML41 [Vitis vinifera]
chr18	10705001	10706000	0.0173	0.27	43	0	26	4	-15.38	0	15.38	VIT_218s0001g12520	VIT_218s0001g12520	550.164	823.236	277.092	0.336589	-1.57094	1.69601e-05	0.00237996	Down	8.10691	2.50207	LOC100259194	At2g16250; F16F14.25	hypothetical protein VITISV_008690 [Vitis vinifera]
chr18	10708001	10709000	1	1	182	1	22	0	0.55	0.55	0	VIT_218s0001g12520	VIT_218s0001g12520	550.164	823.236	277.092	0.336589	-1.57094	1.69601e-05	0.00237996	Down	8.10691	2.50207	LOC100259194	At2g16250; F16F14.25	hypothetical protein VITISV_008690 [Vitis vinifera]
chr18	11779001	11780000	0.114	0.797	131	3	138	0	2.29	2.29	0	VIT_218s0001g13790	VIT_218s0001g13790	307.068	468.895	145.242	0.309753	-1.69081	0.000161348	0.0168129	Down	9.86635	2.67998	LOC100260935	CYP83B1; Synonyms=ATR4, RED1, RNT1, RUNT1, SUR2; At4g31500; F3L17.70	PREDICTED: cytochrome P450 71A1 [Vitis vinifera]
chr18	11780001	11781000	0.498	1	120	2	120	0	1.67	1.67	0	VIT_218s0001g13790	VIT_218s0001g13790	307.068	468.895	145.242	0.309753	-1.69081	0.000161348	0.0168129	Down	9.86635	2.67998	LOC100260935	CYP83B1; Synonyms=ATR4, RED1, RNT1, RUNT1, SUR2; At4g31500; F3L17.70	PREDICTED: cytochrome P450 71A1 [Vitis vinifera]
chr18	12762001	12763000	0.000221	0.0124	10	8	11	0	80	80	0	VIT_218s0001g14690	VIT_218s0001g14690	151.111	212.604	89.6171	0.42152	-1.24633	0.0321209	0.979872	Down	2.58252	1.08946	LOC100264402	PERK14; At4g32710; F4D11.90	PREDICTED: receptor-like serine/threonine-protein kinase At3g01300 [Vitis vinifera]
chr18	12763001	12764000	0.333	1	80	1	160	0	1.25	1.25	0	VIT_218s0001g14690	VIT_218s0001g14690	151.111	212.604	89.6171	0.42152	-1.24633	0.0321209	0.979872	Down	2.58252	1.08946	LOC100264402	PERK14; At4g32710; F4D11.90	PREDICTED: receptor-like serine/threonine-protein kinase At3g01300 [Vitis vinifera]
chr18	12765001	12766000	1	1	86	1	41	0	1.16	1.16	0	VIT_218s0001g14690	VIT_218s0001g14690	151.111	212.604	89.6171	0.42152	-1.24633	0.0321209	0.979872	Down	2.58252	1.08946	LOC100264402	PERK14; At4g32710; F4D11.90	PREDICTED: receptor-like serine/threonine-protein kinase At3g01300 [Vitis vinifera]
chr18	12767001	12768000	0.21	1	308	0	82	1	-1.22	0	1.22	VIT_218s0001g14690	VIT_218s0001g14690	151.111	212.604	89.6171	0.42152	-1.24633	0.0321209	0.979872	Down	2.58252	1.08946	LOC100264402	PERK14; At4g32710; F4D11.90	PREDICTED: receptor-like serine/threonine-protein kinase At3g01300 [Vitis vinifera]
chr18	12834001	12835000	1	1	105	1	32	0	0.95	0.95	0	VIT_218s0001g14770	VIT_218s0001g14770	191.673	115.525	267.821	2.3183	1.21307	0.0216864	0.77238	Up	1.22161	3.77351	LOC100267792	EXL3; At1g75900; T4O12.13	PREDICTED: uncharacterized protein LOC100264374 [Vitis vinifera]
chr18	12836001	12837000	0.323	1	21	0	10	1	-10	0	10	VIT_218s0001g14770	VIT_218s0001g14770	191.673	115.525	267.821	2.3183	1.21307	0.0216864	0.77238	Up	1.22161	3.77351	LOC100267792	EXL3; At1g75900; T4O12.13	PREDICTED: uncharacterized protein LOC100264374 [Vitis vinifera]
chr18	12840001	12841000	0.264	1	21	0	31	3	-9.68	0	9.68	VIT_218s0001g14770	VIT_218s0001g14770	191.673	115.525	267.821	2.3183	1.21307	0.0216864	0.77238	Up	1.22161	3.77351	LOC100267792	EXL3; At1g75900; T4O12.13	PREDICTED: uncharacterized protein LOC100264374 [Vitis vinifera]
chr18	13310001	13311000	0.289	1	20	1	108	1	4.07	5	0.93	VIT_218s0001g15220	VIT_218s0001g15220	169.03	232.991	105.068	0.450954	-1.14895	0.0384622	1	Down	15.0657	6.3501	LOC100245483		unnamed protein product, partial [Vitis vinifera]
chr18	13313001	13314000	1	1	100	1	63	0	1	1	0	VIT_218s0001g15220	VIT_218s0001g15220	169.03	232.991	105.068	0.450954	-1.14895	0.0384622	1	Down	15.0657	6.3501	LOC100245483		unnamed protein product, partial [Vitis vinifera]
chr18	25056001	25057000	1	1	60	1	31	0	1.67	1.67	0	VIT_218s0041g00590	VIT_218s0041g00590	19.453	3.88319	35.0228	9.01908	3.17298	0.0280495	0.898651	Up	0.134431	1.03225	LOC104882760	NPF5.10; At1g22540; F12K8.12	PREDICTED: protein NRT1/ PTR FAMILY 5.10-like [Vitis vinifera]
chr18	27369001	27370000	0.297	1	93	4	56	0	4.3	4.3	0	VIT_218s0041g02240	VIT_218s0041g02240	16.4517	0.970797	31.9325	32.8931	5.03971	0.00674997	0.329948	Up	0	0.451651	LOC100249943	ABCA8; Synonyms=ATH7; At3g47790; T23J7.120	unnamed protein product, partial [Vitis vinifera]
chr18	27373001	27374000	0.017	0.267	20	4	95	3	16.84	20	3.16	VIT_218s0041g02240	VIT_218s0041g02240	16.4517	0.970797	31.9325	32.8931	5.03971	0.00674997	0.329948	Up	0	0.451651	LOC100249943	ABCA8; Synonyms=ATH7; At3g47790; T23J7.120	unnamed protein product, partial [Vitis vinifera]
chr18	27375001	27376000	0.191	1	109	2	140	0	1.83	1.83	0	VIT_218s0041g02240	VIT_218s0041g02240	16.4517	0.970797	31.9325	32.8931	5.03971	0.00674997	0.329948	Up	0	0.451651	LOC100249943	ABCA8; Synonyms=ATH7; At3g47790; T23J7.120	unnamed protein product, partial [Vitis vinifera]
chr18	27376001	27377000	1	1	146	0	179	1	-0.56	0	0.56	VIT_218s0041g02240	VIT_218s0041g02240	16.4517	0.970797	31.9325	32.8931	5.03971	0.00674997	0.329948	Up	0	0.451651	LOC100249943	ABCA8; Synonyms=ATH7; At3g47790; T23J7.120	unnamed protein product, partial [Vitis vinifera]
chr19	482001	483000	1	1	229	2	57	0	0.87	0.87	0	VIT_219s0014g00470	VIT_219s0014g00470	129.49	229.108	29.8724	0.130386	-2.93914	1.0751e-05	0.00161642	Down	3.24847	0.51441	LOC100255520	LRR-RLK; At3g14840; T21E2.2	PREDICTED: probable leucine-rich repeat receptor-like serine/threonine-protein kinase At3g14840 [Vitis vinifera]
chr19	484001	485000	1	1	20	1	20	0	5	5	0	VIT_219s0014g00470	VIT_219s0014g00470	129.49	229.108	29.8724	0.130386	-2.93914	1.0751e-05	0.00161642	Down	3.24847	0.51441	LOC100255520	LRR-RLK; At3g14840; T21E2.2	PREDICTED: probable leucine-rich repeat receptor-like serine/threonine-protein kinase At3g14840 [Vitis vinifera]
chr19	3863001	3864000	0.545	1	267	2	143	0	0.75	0.75	0	VIT_219s0014g03770	VIT_219s0014g03770	74.6513	135.912	13.3911	0.0985278	-3.34333	8.4593e-05	0.00989221	Down	2.38973	0.216019	LOC100255568		PREDICTED: uncharacterized protein LOC100255568 [Vitis vinifera]
chr19	3864001	3865000	1	1	171	2	20	0	1.17	1.17	0	VIT_219s0014g03770	VIT_219s0014g03770	74.6513	135.912	13.3911	0.0985278	-3.34333	8.4593e-05	0.00989221	Down	2.38973	0.216019	LOC100255568		PREDICTED: uncharacterized protein LOC100255568 [Vitis vinifera]
chr19	4584001	4585000	0.526	1	41	0	68	2	-2.94	0	2.94	VIT_219s0014g04310	VIT_219s0014g04310	46.5278	78.6345	14.4211	0.183395	-2.44698	0.0112689	0.472509	Down	1.05628	0.215497	LOC109121490	At4g27290; M4I22.100	PREDICTED: uncharacterized protein LOC100262308 [Vitis vinifera]
chr19	4594001	4595000	0.423	1	155	1	211	0	0.65	0.65	0	VIT_219s0014g04310	VIT_219s0014g04310	46.5278	78.6345	14.4211	0.183395	-2.44698	0.0112689	0.472509	Down	1.05628	0.215497	LOC109121490	At4g27290; M4I22.100	PREDICTED: uncharacterized protein LOC100262308 [Vitis vinifera]
chr19	5389001	5390000	1	1	205	1	126	0	0.49	0.49	0	VIT_219s0014g05070	VIT_219s0014g05070	9.27074	0	18.5415	Inf	Inf	0.0204626	0.742479	Up	0	0.266885	LOC100248639	KIN14N {ECO:0000305}; Synonyms=ATK3 {ECO:0000305}, KATC {ECO:0000312|EMBL:BAA04674.1}; At5g54670 {ECO:0000312|Araport:AT5G54670}; K5F14.1 {ECO:0000312|EMBL:BAB09933.1}, MRB17.18	PREDICTED: kinesin-3 isoform X1 [Vitis vinifera]
chr19	5390001	5391000	1	1	132	1	10	0	0.76	0.76	0	VIT_219s0014g05070	VIT_219s0014g05070	9.27074	0	18.5415	Inf	Inf	0.0204626	0.742479	Up	0	0.266885	LOC100248639	KIN14N {ECO:0000305}; Synonyms=ATK3 {ECO:0000305}, KATC {ECO:0000312|EMBL:BAA04674.1}; At5g54670 {ECO:0000312|Araport:AT5G54670}; K5F14.1 {ECO:0000312|EMBL:BAB09933.1}, MRB17.18	PREDICTED: kinesin-3 isoform X1 [Vitis vinifera]
chr19	5391001	5392000	1	1	10	0	20	1	-5	0	5	VIT_219s0014g05070	VIT_219s0014g05070	9.27074	0	18.5415	Inf	Inf	0.0204626	0.742479	Up	0	0.266885	LOC100248639	KIN14N {ECO:0000305}; Synonyms=ATK3 {ECO:0000305}, KATC {ECO:0000312|EMBL:BAA04674.1}; At5g54670 {ECO:0000312|Araport:AT5G54670}; K5F14.1 {ECO:0000312|EMBL:BAB09933.1}, MRB17.18	PREDICTED: kinesin-3 isoform X1 [Vitis vinifera]
chr19	5392001	5393000	0.138	0.879	63	3	110	1	3.85	4.76	0.91	VIT_219s0014g05070	VIT_219s0014g05070	9.27074	0	18.5415	Inf	Inf	0.0204626	0.742479	Up	0	0.266885	LOC100248639	KIN14N {ECO:0000305}; Synonyms=ATK3 {ECO:0000305}, KATC {ECO:0000312|EMBL:BAA04674.1}; At5g54670 {ECO:0000312|Araport:AT5G54670}; K5F14.1 {ECO:0000312|EMBL:BAB09933.1}, MRB17.18	PREDICTED: kinesin-3 isoform X1 [Vitis vinifera]
chr19	5394001	5395000	0.145	0.9	11	1	277	3	8.01	9.09	1.08	VIT_219s0014g05070	VIT_219s0014g05070	9.27074	0	18.5415	Inf	Inf	0.0204626	0.742479	Up	0	0.266885	LOC100248639	KIN14N {ECO:0000305}; Synonyms=ATK3 {ECO:0000305}, KATC {ECO:0000312|EMBL:BAA04674.1}; At5g54670 {ECO:0000312|Araport:AT5G54670}; K5F14.1 {ECO:0000312|EMBL:BAB09933.1}, MRB17.18	PREDICTED: kinesin-3 isoform X1 [Vitis vinifera]
chr19	6697001	6698000	1	1	43	1	21	0	2.33	2.33	0	VIT_219s0090g00600	VIT_219s0090g00600	19.0491	33.9779	4.12033	0.121265	-3.04376	0.0362016	1	Down	2.89232	0.382118
chr19	6731001	6732000	0.16	0.936	101	2	151	0	1.98	1.98	0	VIT_219s0090g00660	VIT_219s0090g00660	94.3822	147.561	41.2033	0.279229	-1.84048	0.00983177	0.431144	Down	3.06732	0.926736	LOC100255502	At5g55050; K13P22.5	PREDICTED: GDSL esterase/lipase At5g55050 [Vitis vinifera]
chr19	8602001	8603000	1	1	22	0	143	1	-0.7	0	0.7	VIT_219s0015g00550	VIT_219s0015g00550	1227.24	1740.64	713.847	0.410106	-1.28593	1.02109e-05	0.00155746	Down	12.3581	5.00975	LOC100256580	NUDT10; Synonyms=NUDX10; At4g25434; T30C3.4	PREDICTED: nudix hydrolase 10 isoform X1 [Vitis vinifera]
chr19	8604001	8605000	0.527	1	11	0	20	2	-10	0	10	VIT_219s0015g00550	VIT_219s0015g00550	1227.24	1740.64	713.847	0.410106	-1.28593	1.02109e-05	0.00155746	Down	12.3581	5.00975	LOC100256580	NUDT10; Synonyms=NUDX10; At4g25434; T30C3.4	PREDICTED: nudix hydrolase 10 isoform X1 [Vitis vinifera]
chr19	8605001	8606000	1	1	60	1	23	0	1.67	1.67	0	VIT_219s0015g00550	VIT_219s0015g00550	1227.24	1740.64	713.847	0.410106	-1.28593	1.02109e-05	0.00155746	Down	12.3581	5.00975	LOC100256580	NUDT10; Synonyms=NUDX10; At4g25434; T30C3.4	PREDICTED: nudix hydrolase 10 isoform X1 [Vitis vinifera]
chr19	8606001	8607000	0.146	0.902	166	0	103	2	-1.94	0	1.94	VIT_219s0015g00550	VIT_219s0015g00550	1227.24	1740.64	713.847	0.410106	-1.28593	1.02109e-05	0.00155746	Down	12.3581	5.00975	LOC100256580	NUDT10; Synonyms=NUDX10; At4g25434; T30C3.4	PREDICTED: nudix hydrolase 10 isoform X1 [Vitis vinifera]
chr19	9759001	9760000	1	1	94	1	20	0	1.06	1.06	0	VIT_219s0015g01440	VIT_219s0015g01440	23.477	40.7735	6.18049	0.151581	-2.72184	0.0359757	1	Down	0.92089	0.08935	LOC100246366	At3g47200; F13I12.250	PREDICTED: UPF0481 protein At3g47200-like [Vitis vinifera]
chr19	9762001	9763000	0.142	0.892	156	0	95	2	-2.11	0	2.11	VIT_219s0015g01440	VIT_219s0015g01440	23.477	40.7735	6.18049	0.151581	-2.72184	0.0359757	1	Down	0.92089	0.08935	LOC100246366	At3g47200; F13I12.250	PREDICTED: UPF0481 protein At3g47200-like [Vitis vinifera]
chr12_random	910001	911000	0.000792	0.0325	41	5	187	1	11.66	12.2	0.53	VIT_212s0028g00300	VIT_212s0028g00300	104.02	152.415	55.6244	0.364954	-1.45422	0.0317986	0.973193	Down	3.76567	1.278	LOC100268105	OM64; Synonyms=TOC64-V; At5g09420; T5E8.220	PREDICTED: outer envelope protein 64, mitochondrial [Vitis vinifera]
chr12_random	912001	913000	0.202	1	95	0	78	2	-2.56	0	2.56	VIT_212s0028g00300	VIT_212s0028g00300	104.02	152.415	55.6244	0.364954	-1.45422	0.0317986	0.973193	Down	3.76567	1.278	LOC100268105	OM64; Synonyms=TOC64-V; At5g09420; T5E8.220	PREDICTED: outer envelope protein 64, mitochondrial [Vitis vinifera]
chr12_random	921001	922000	0.000925	0.0367	10	3	83	0	30	30	0	VIT_212s0028g00300	VIT_212s0028g00300	104.02	152.415	55.6244	0.364954	-1.45422	0.0317986	0.973193	Down	3.76567	1.278	LOC100268105	OM64; Synonyms=TOC64-V; At5g09420; T5E8.220	PREDICTED: outer envelope protein 64, mitochondrial [Vitis vinifera]
chr12_random	939001	940000	0.00115	0.043	20	0	149	47	-31.54	0	31.54	VIT_212s0028g00300	VIT_212s0028g00300	104.02	152.415	55.6244	0.364954	-1.45422	0.0317986	0.973193	Down	3.76567	1.278	LOC100268105	OM64; Synonyms=TOC64-V; At5g09420; T5E8.220	PREDICTED: outer envelope protein 64, mitochondrial [Vitis vinifera]
chr13_random	2871001	2872000	0.419	1	31	1	43	0	3.23	3.23	0	VIT_213s0019g01220	VIT_213s0019g01220	156.461	239.787	73.1358	0.305004	-1.7131	0.00325779	0.19481	Down	6.98213	2.0035	LOC100258442	SCL3; At1g50420; F11F12.22	PREDICTED: scarecrow-like protein 3 isoform X1 [Vitis vinifera]
chr13_random	2872001	2873000	0.168	0.954	31	2	44	0	6.45	6.45	0	VIT_213s0019g01220	VIT_213s0019g01220	156.461	239.787	73.1358	0.305004	-1.7131	0.00325779	0.19481	Down	6.98213	2.0035	LOC100258442	SCL3; At1g50420; F11F12.22	PREDICTED: scarecrow-like protein 3 isoform X1 [Vitis vinifera]
chr16_random	723001	724000	0.425	1	17	1	23	0	5.88	5.88	0	VIT_216s0039g01330	VIT_216s0039g01330	56.5322	88.3425	24.722	0.279842	-1.83731	0.0343483	1	Down	2.42627	0.703176	LOC100253347	LRK10 {ECO:0000312|EMBL:AAC49629.1}	PREDICTED: glycerophosphodiester phosphodiesterase protein kinase domain-containing GDPDL2-like [Vitis vinifera]
chr16_random	724001	725000	0.27	1	10	1	27	0	10	10	0	VIT_216s0039g01330	VIT_216s0039g01330	56.5322	88.3425	24.722	0.279842	-1.83731	0.0343483	1	Down	2.42627	0.703176	LOC100253347	LRK10 {ECO:0000312|EMBL:AAC49629.1}	PREDICTED: glycerophosphodiester phosphodiesterase protein kinase domain-containing GDPDL2-like [Vitis vinifera]
chr17_random	693001	694000	1	1	31	0	45	1	-2.22	0	2.22	VIT_217s0000g00940	VIT_217s0000g00940	75.2738	115.525	35.0228	0.303162	-1.72184	0.0260617	0.866625	Down	4.57553	0.803825	LOC100854679	At1g46984; F2G19.21	PREDICTED: putative F-box protein At1g46984 isoform X2 [Vitis vinifera]
chr17_random	695001	696000	0.0827	0.677	78	0	32	2	-6.25	0	6.25	VIT_217s0000g00940	VIT_217s0000g00940	75.2738	115.525	35.0228	0.303162	-1.72184	0.0260617	0.866625	Down	4.57553	0.803825	LOC100854679	At1g46984; F2G19.21	PREDICTED: putative F-box protein At1g46984 isoform X2 [Vitis vinifera]
chr18_random	346001	347000	0.211	1	41	1	153	0	2.44	2.44	0	VIT_218s0122g00370	VIT_218s0122g00370	12.361	0	24.722	Inf	Inf	0.0067045	0.329727	Up	0	1.07435	LOC100258638	TT10; Synonyms=LAC15; At5g48100; MDN11.18	PREDICTED: laccase-15-like isoform X2 [Vitis vinifera]
chrUn	7580001	7581000	0.1	0.747	281	9	163	1	2.59	3.2	0.61	VIT_200s0179g00350	VIT_200s0179g00350	269.185	360.166	178.204	0.494784	-1.01513	0.0278984	0.896042	Down	4.88086	2.33295	LOC100256253		PREDICTED: pyruvate kinase isozyme A, chloroplastic [Vitis vinifera]
chrUn	8998001	8999000	1	1	73	2	21	0	2.74	2.74	0	VIT_200s0187g00020	VIT_200s0187g00020	118.326	206.78	29.8724	0.144465	-2.79121	4.69161e-05	0.00602157	Down	8.99512	1.36477	LOC100853073		PREDICTED: uncharacterized protein LOC100853073 [Vitis vinifera]
chrUn	10723001	10724000	1	1	34	1	25	0	2.94	2.94	0	VIT_200s0194g00260	VIT_200s0194g00260	131.387	32.0363	230.738	7.20241	2.84848	1.5083e-05	0.00215974	Up	0.621745	3.87503	LOC100252735	MAP70.5; At4g17220; dl4645c, FCAALL.385	PREDICTED: microtubule-associated protein 70-5 [Vitis vinifera]
chrUn	10725001	10726000	0.215	1	73	1	267	0	1.37	1.37	0	VIT_200s0194g00260	VIT_200s0194g00260	131.387	32.0363	230.738	7.20241	2.84848	1.5083e-05	0.00215974	Up	0.621745	3.87503	LOC100252735	MAP70.5; At4g17220; dl4645c, FCAALL.385	PREDICTED: microtubule-associated protein 70-5 [Vitis vinifera]
chrUn	10775001	10776000	7.63e-11	4.55e-08	10	9	86	1	88.84	90	1.16	VIT_200s0194g00330	VIT_200s0194g00330	39.9212	75.7221	4.12033	0.0544138	-4.19988	0.000334542	0.0304838	Down	1.52151	0.090354	LOC104878150		PREDICTED: uncharacterized protein LOC104878150 [Vitis vinifera]
chrUn	10778001	10779000	1	1	10	0	41	1	-2.44	0	2.44	VIT_200s0194g00330	VIT_200s0194g00330	39.9212	75.7221	4.12033	0.0544138	-4.19988	0.000334542	0.0304838	Down	1.52151	0.090354	LOC104878150		PREDICTED: uncharacterized protein LOC104878150 [Vitis vinifera]
chrUn	14870001	14871000	0.267	1	239	7	138	1	2.2	2.93	0.72	VIT_200s0226g00100	VIT_200s0226g00100	44.7752	85.4301	4.12033	0.0482304	-4.37391	0.000115815	0.0132488	Down	0.725479	0.0474822	LOC100254306		PREDICTED: uncharacterized protein LOC100254306 isoform X1 [Vitis vinifera]
chrUn	14871001	14872000	1	1	153	2	62	0	1.31	1.31	0	VIT_200s0226g00100	VIT_200s0226g00100	44.7752	85.4301	4.12033	0.0482304	-4.37391	0.000115815	0.0132488	Down	0.725479	0.0474822	LOC100254306		PREDICTED: uncharacterized protein LOC100254306 isoform X1 [Vitis vinifera]
chrUn	19993001	19994000	0.501	1	132	0	154	2	-1.3	0	1.3	VIT_200s0270g00120	VIT_200s0270g00120	200.003	382.494	17.5114	0.0457822	-4.44907	1.12552e-12	6.58086e-10	Down	17.0326	0.919091	LOC100242727	KTI2 {ECO:0000305}; At1g17860 {ECO:0000312|Araport:AT1G17860}; F2H15.9 {ECO:0000312|EMBL:AAF97266.1}	PREDICTED: alpha-amylase/subtilisin inhibitor-like [Vitis vinifera]
chrUn	20434001	20435000	1	1	123	0	138	1	-0.72	0	0.72	VIT_200s0274g00090	VIT_200s0274g00090	105.824	177.656	33.9927	0.19134	-2.38579	0.000654025	0.0535665	Down	17.9465	2.99168	LOC100241452	At4g27270 {ECO:0000312|Araport:AT4G27270}	PREDICTED: probable NAD(P)H dehydrogenase (quinone) FQR1-like 1 [Vitis vinifera]
chrUn	26264001	26265000	1	1	23	0	226	1	-0.44	0	0.44	VIT_200s0373g00030	VIT_200s0373g00030	13.165	24.2699	2.06016	0.0848855	-3.55834	0.0474239	1	Down	0.0201521	0	LOC100247421	HSL2; At5g65710; F6H11.160, MPA24.6	unnamed protein product, partial [Vitis vinifera]
chrUn	27375001	27376000	1	1	10	0	150	2	-1.33	0	1.33	VIT_200s0397g00010	VIT_200s0397g00010	133.907	219.4	48.4138	0.220665	-2.18007	0.000559047	0.0472586	Down	2.72798	0.673989	LOC100853774		PREDICTED: leucine-rich repeat receptor protein kinase EXS-like, partial [Vitis vinifera]
chrUn	28934001	28935000	1	1	331	5	51	0	1.51	1.51	0	VIT_200s0434g00090	VIT_200s0434g00090	57.0176	89.3133	24.722	0.276801	-1.85308	0.032366	0.981515	Down	14.4625	3.7644	LOC100853521	APF1 {ECO:0000305}; At2g17760 {ECO:0000312|Araport:AT2G17760}; T17A5.8 {ECO:0000305}	unnamed protein product, partial [Vitis vinifera]
chrUn	29039001	29040000	0.501	1	78	0	94	2	-2.13	0	2.13	VIT_200s0437g00070	VIT_200s0437g00070	11.6496	23.2991	0	0	#NAME?	0.00968566	0.426946	Down	0.616105	0	LOC100853934	CRK26; At4g38830; T9A14.110	PREDICTED: cysteine-rich receptor-like protein kinase 10, partial [Vitis vinifera]
chrUn	29490001	29491000	0.408	1	74	0	51	1	-1.96	0	1.96	VIT_200s0454g00030	VIT_200s0454g00030	203.867	272.794	134.941	0.494662	-1.01549	0.0482426	1	Down	1.95539	0.923646	LOC100250428	SBT5.4 {ECO:0000303|PubMed:16193095}; At5g59810; MMN10.6	unnamed protein product, partial [Vitis vinifera]
chrUn	32973001	32974000	0.228	1	73	1	10	1	-8.63	1.37	10	VIT_200s0615g00020	VIT_200s0615g00020	44.2898	84.4593	4.12033	0.0487848	-4.35743	0.000128718	0.0142599	Down	3.03427	0.154242	LOC100855415	CAD	PREDICTED: probable mannitol dehydrogenase [Vitis vinifera]
chrUn	33081001	33082000	1	1	73	1	31	0	1.37	1.37	0	VIT_200s0620g00010	VIT_200s0620g00010	14.5619	29.1239	0	0	#NAME?	0.00360835	0.207504	Down	0.488278	0	LOC100247003	At4g16820; dl4435w, FCAALL.42	PREDICTED: phospholipase A1-Ibeta2, chloroplastic [Vitis vinifera]
chrUn	34296001	34297000	0.41	1	43	1	62	0	2.33	2.33	0	VIT_200s0691g00010	VIT_200s0691g00010	14.1358	26.2115	2.06016	0.0785977	-3.66937	0.0363734	1	Down	0.236361	0.0174137	LOC109122192	ACA13; At3g22910; F5N5.8	PREDICTED: putative calcium-transporting ATPase 13, plasma membrane-type [Vitis vinifera]
chrUn	34998001	34999000	1	1	43	0	141	1	-0.71	0	0.71	VIT_200s0748g00020	VIT_200s0748g00020	22.3876	42.7151	2.06016	0.0482304	-4.37391	0.00408042	0.228428	Down	0.998331	0.0570332	LOC100855392	CRK25; At4g05200; C17L7.120, C6L9.3	PREDICTED: putative receptor-like protein kinase At4g00960 [Vitis vinifera]
chrUn	34999001	35000000	0.0248	0.336	369	5	402	0	1.36	1.36	0	VIT_200s0748g00020	VIT_200s0748g00020	22.3876	42.7151	2.06016	0.0482304	-4.37391	0.00408042	0.228428	Down	0.998331	0.0570332	LOC100855392	CRK25; At4g05200; C17L7.120, C6L9.3	PREDICTED: putative receptor-like protein kinase At4g00960 [Vitis vinifera]
chrUn	35001001	35002000	0.127	0.841	400	4	355	0	1	1	0	VIT_200s0748g00020	VIT_200s0748g00020	22.3876	42.7151	2.06016	0.0482304	-4.37391	0.00408042	0.228428	Down	0.998331	0.0570332	LOC100855392	CRK25; At4g05200; C17L7.120, C6L9.3	PREDICTED: putative receptor-like protein kinase At4g00960 [Vitis vinifera]
chrUn	35322001	35323000	1	1	131	1	42	0	0.76	0.76	0	VIT_200s0780g00040	VIT_200s0780g00040	88.9761	172.802	5.15041	0.0298053	-5.06829	3.11593e-08	7.99844e-06	Down	4.61422	0.159951	LOC100255057	RGLG2 {ECO:0000303|PubMed:17586653}; At5g14420; F18O22.210	PREDICTED: E3 ubiquitin-protein ligase RGLG2-like [Vitis vinifera]
chrUn	40339001	40340000	0.315	1	165	1	359	0	0.61	0.61	0	VIT_200s1764g00020	VIT_200s1764g00020	34.7301	60.1894	9.27074	0.154026	-2.69875	0.0143193	0.565491	Down	2.27275	0.301388	LOC100253000	At1g12460; F5O11.21, T12C24.1	unnamed protein product, partial [Vitis vinifera]
chr1	2094001	2095000	0.534	1	295	2	171	0	0.68	0.68	0	VIT_201s0011g02320	VIT_201s0011g02320	502.169	860.126	144.211	0.167663	-2.57636	5.31799e-11	2.38167e-08	Down	14.8264	2.20687	LOC100266416		PREDICTED: uncharacterized protein LOC100266416 [Vitis vinifera]
chr1	2095001	2096000	0.108	0.451	374	0	183	2	-1.09	0	1.09	VIT_201s0011g02320	VIT_201s0011g02320	502.169	860.126	144.211	0.167663	-2.57636	5.31799e-11	2.38167e-08	Down	14.8264	2.20687	LOC100266416		PREDICTED: uncharacterized protein LOC100266416 [Vitis vinifera]
chr1	2096001	2097000	0.0588	0.314	160	0	10	1	-10	0	10	VIT_201s0011g02320	VIT_201s0011g02320	502.169	860.126	144.211	0.167663	-2.57636	5.31799e-11	2.38167e-08	Down	14.8264	2.20687	LOC100266416		PREDICTED: uncharacterized protein LOC100266416 [Vitis vinifera]
chr1	2424001	2425000	0.201	0.637	135	0	110	2	-1.82	0	1.82	VIT_201s0011g02710	VIT_201s0011g02710	1975.27	1296.01	2654.52	2.04822	1.03437	9.32576e-05	0.0108452	Up	84.501	164.021			hypothetical protein VITISV_039481 [Vitis vinifera]
chr1	2425001	2426000	1	1	132	0	540	3	-0.56	0	0.56	VIT_201s0011g02710	VIT_201s0011g02710	1975.27	1296.01	2654.52	2.04822	1.03437	9.32576e-05	0.0108452	Up	84.501	164.021			hypothetical protein VITISV_039481 [Vitis vinifera]
chr1	2427001	2428000	0.36	0.848	266	7	80	0	2.63	2.63	0	VIT_201s0011g02710	VIT_201s0011g02710	1975.27	1296.01	2654.52	2.04822	1.03437	9.32576e-05	0.0108452	Up	84.501	164.021			hypothetical protein VITISV_039481 [Vitis vinifera]
chr1	2427001	2428000	0.36	0.848	266	7	80	0	2.63	2.63	0	VIT_201s0011g02720	VIT_201s0011g02720	1150.26	753.338	1547.18	2.05377	1.03827	0.000408237	0.0364109	Up	78.5191	152.499			unnamed protein product, partial [Vitis vinifera]
chr1	2428001	2429000	1	1	46	0	713	2	-0.28	0	0.28	VIT_201s0011g02720	VIT_201s0011g02720	1150.26	753.338	1547.18	2.05377	1.03827	0.000408237	0.0364109	Up	78.5191	152.499			unnamed protein product, partial [Vitis vinifera]
chr1	3015001	3016000	1	1	60	1	57	0	1.67	1.67	0	VIT_201s0011g03330	VIT_201s0011g03330	295.122	455.304	134.941	0.296375	-1.7545	0.000118892	0.0134546	Down	7.70457	2.13769	LOC100252495		PREDICTED: uncharacterized protein LOC100252495 [Vitis vinifera]			path:vvi04144	Endocytosis
chr1	3066001	3067000	0.0465	0.27	501	0	761	7	-0.92	0	0.92	VIT_201s0011g03390	VIT_201s0011g03390	25.4186	44.6566	6.18049	0.1384	-2.85308	0.0242468	0.829767	Down	0.664879	0.104184	LOC100256114	At4g39670 {ECO:0000312|Araport:AT4G39670}; T19P19.60 {ECO:0000312|EMBL:CAA18753.1}	unnamed protein product, partial [Vitis vinifera]	GO:0005634,GO:0005737,GO:0120013	nucleus|cytoplasm|intermembrane lipid transfer activity
chr1	3067001	3068000	1	1	20	0	154	1	-0.65	0	0.65	VIT_201s0011g03390	VIT_201s0011g03390	25.4186	44.6566	6.18049	0.1384	-2.85308	0.0242468	0.829767	Down	0.664879	0.104184	LOC100256114	At4g39670 {ECO:0000312|Araport:AT4G39670}; T19P19.60 {ECO:0000312|EMBL:CAA18753.1}	unnamed protein product, partial [Vitis vinifera]	GO:0005634,GO:0005737,GO:0120013	nucleus|cytoplasm|intermembrane lipid transfer activity
chr1	3068001	3069000	0.451	0.944	276	0	227	1	-0.44	0	0.44	VIT_201s0011g03390	VIT_201s0011g03390	25.4186	44.6566	6.18049	0.1384	-2.85308	0.0242468	0.829767	Down	0.664879	0.104184	LOC100256114	At4g39670 {ECO:0000312|Araport:AT4G39670}; T19P19.60 {ECO:0000312|EMBL:CAA18753.1}	unnamed protein product, partial [Vitis vinifera]	GO:0005634,GO:0005737,GO:0120013	nucleus|cytoplasm|intermembrane lipid transfer activity
chr1	3070001	3071000	0.00141	0.0232	31	5	716	17	13.75	16.13	2.37	VIT_201s0011g03390	VIT_201s0011g03390	25.4186	44.6566	6.18049	0.1384	-2.85308	0.0242468	0.829767	Down	0.664879	0.104184	LOC100256114	At4g39670 {ECO:0000312|Araport:AT4G39670}; T19P19.60 {ECO:0000312|EMBL:CAA18753.1}	unnamed protein product, partial [Vitis vinifera]	GO:0005634,GO:0005737,GO:0120013	nucleus|cytoplasm|intermembrane lipid transfer activity
chr1	3211001	3212000	0.113	0.464	90	2	339	1	1.93	2.22	0.29	VIT_201s0011g03540	VIT_201s0011g03540	91.7106	49.5106	133.911	2.70468	1.43546	0.04298	1	Up	1.17824	3.31886	LOC100254184	LBD41; Synonyms=ASL38; At3g02550; F16B3.18	PREDICTED: LOB domain-containing protein 40 [Vitis vinifera]	GO:0006355	regulation of transcription, DNA-templated
chr1	3652001	3653000	0.101	0.435	341	0	298	3	-1.01	0	1.01	VIT_201s0011g03990	VIT_201s0011g03990	7.76637	15.5327	0	0	#NAME?	0.0392439	1	Down	0.133702	0	LOC100261088	LRK10L-2.6 {ECO:0000303|PubMed:12805585}; Synonyms=GDPDL2 {ECO:0000303|PubMed:21323773}, SNC4 {ECO:0000303|PubMed:20508139}; At1g66980 {ECO:0000312|Araport:AT1G66980}; F1O19.6 {ECO:0000312|EMBL:AAF98210.1}	PREDICTED: probable receptor-like protein kinase At1g67000 [Vitis vinifera]
chr1	3653001	3654000	1	1	227	1	96	0	0.44	0.44	0	VIT_201s0011g03990	VIT_201s0011g03990	7.76637	15.5327	0	0	#NAME?	0.0392439	1	Down	0.133702	0	LOC100261088	LRK10L-2.6 {ECO:0000303|PubMed:12805585}; Synonyms=GDPDL2 {ECO:0000303|PubMed:21323773}, SNC4 {ECO:0000303|PubMed:20508139}; At1g66980 {ECO:0000312|Araport:AT1G66980}; F1O19.6 {ECO:0000312|EMBL:AAF98210.1}	PREDICTED: probable receptor-like protein kinase At1g67000 [Vitis vinifera]
chr1	3655001	3656000	0.344	0.831	81	0	238	6	-2.52	0	2.52	VIT_201s0011g03990	VIT_201s0011g03990	7.76637	15.5327	0	0	#NAME?	0.0392439	1	Down	0.133702	0	LOC100261088	LRK10L-2.6 {ECO:0000303|PubMed:12805585}; Synonyms=GDPDL2 {ECO:0000303|PubMed:21323773}, SNC4 {ECO:0000303|PubMed:20508139}; At1g66980 {ECO:0000312|Araport:AT1G66980}; F1O19.6 {ECO:0000312|EMBL:AAF98210.1}	PREDICTED: probable receptor-like protein kinase At1g67000 [Vitis vinifera]
chr1	4117001	4118000	0.446	0.938	161	1	200	0	0.62	0.62	0	VIT_201s0011g04550	VIT_201s0011g04550	272.523	368.903	176.144	0.477481	-1.06649	0.0204313	0.742479	Down	24.8415	10.9916	LOC100262828		PREDICTED: uncharacterized protein LOC100262828 [Vitis vinifera]
chr1	4194001	4195000	1	1	195	0	369	1	-0.27	0	0.27	VIT_201s0011g04660	VIT_201s0011g04660	8.73717	17.4743	0	0	#NAME?	0.0274209	0.885778	Down	0.762261	0	LOC104881294		PREDICTED: uncharacterized protein LOC104881294 [Vitis vinifera]
chr1	4261001	4262000	0.103	0.44	10	1	87	0	10	10	0	VIT_201s0011g04720	VIT_201s0011g04720	268.147	394.143	142.151	0.360659	-1.47129	0.00166548	0.118036	Down	6.15364	2.01505	LOC100244049	LPR1; At1g23010; F19G10.5	unnamed protein product, partial [Vitis vinifera]	GO:0005507,GO:0005783,GO:0005789,GO:0010073,GO:0016036,GO:0016682,GO:0016722,GO:0080167	copper ion binding|endoplasmic reticulum|endoplasmic reticulum membrane|meristem maintenance|cellular response to phosphate starvation|oxidoreductase activity, acting on diphenols and related substances as donors, oxygen as acceptor|oxidoreductase activity, oxidizing metal ions|response to karrikin
chr1	4262001	4263000	1	1	143	1	65	0	0.7	0.7	0	VIT_201s0011g04720	VIT_201s0011g04720	268.147	394.143	142.151	0.360659	-1.47129	0.00166548	0.118036	Down	6.15364	2.01505	LOC100244049	LPR1; At1g23010; F19G10.5	unnamed protein product, partial [Vitis vinifera]	GO:0005507,GO:0005783,GO:0005789,GO:0010073,GO:0016036,GO:0016682,GO:0016722,GO:0080167	copper ion binding|endoplasmic reticulum|endoplasmic reticulum membrane|meristem maintenance|cellular response to phosphate starvation|oxidoreductase activity, acting on diphenols and related substances as donors, oxygen as acceptor|oxidoreductase activity, oxidizing metal ions|response to karrikin
chr1	4263001	4264000	0.138	0.52	137	0	183	4	-2.19	0	2.19	VIT_201s0011g04720	VIT_201s0011g04720	268.147	394.143	142.151	0.360659	-1.47129	0.00166548	0.118036	Down	6.15364	2.01505	LOC100244049	LPR1; At1g23010; F19G10.5	unnamed protein product, partial [Vitis vinifera]	GO:0005507,GO:0005783,GO:0005789,GO:0010073,GO:0016036,GO:0016682,GO:0016722,GO:0080167	copper ion binding|endoplasmic reticulum|endoplasmic reticulum membrane|meristem maintenance|cellular response to phosphate starvation|oxidoreductase activity, acting on diphenols and related substances as donors, oxygen as acceptor|oxidoreductase activity, oxidizing metal ions|response to karrikin
chr1	4264001	4265000	1	1	44	0	857	2	-0.23	0	0.23	VIT_201s0011g04720	VIT_201s0011g04720	268.147	394.143	142.151	0.360659	-1.47129	0.00166548	0.118036	Down	6.15364	2.01505	LOC100244049	LPR1; At1g23010; F19G10.5	unnamed protein product, partial [Vitis vinifera]	GO:0005507,GO:0005783,GO:0005789,GO:0010073,GO:0016036,GO:0016682,GO:0016722,GO:0080167	copper ion binding|endoplasmic reticulum|endoplasmic reticulum membrane|meristem maintenance|cellular response to phosphate starvation|oxidoreductase activity, acting on diphenols and related substances as donors, oxygen as acceptor|oxidoreductase activity, oxidizing metal ions|response to karrikin
chr1	4265001	4266000	0.0529	0.294	120	3	198	0	2.5	2.5	0	VIT_201s0011g04720	VIT_201s0011g04720	268.147	394.143	142.151	0.360659	-1.47129	0.00166548	0.118036	Down	6.15364	2.01505	LOC100244049	LPR1; At1g23010; F19G10.5	unnamed protein product, partial [Vitis vinifera]	GO:0005507,GO:0005783,GO:0005789,GO:0010073,GO:0016036,GO:0016682,GO:0016722,GO:0080167	copper ion binding|endoplasmic reticulum|endoplasmic reticulum membrane|meristem maintenance|cellular response to phosphate starvation|oxidoreductase activity, acting on diphenols and related substances as donors, oxygen as acceptor|oxidoreductase activity, oxidizing metal ions|response to karrikin
chr1	4555001	4556000	0.0954	0.421	1162	19	198	0	1.64	1.64	0	VIT_201s0011g04900	VIT_201s0011g04900	110.4	179.597	41.2033	0.22942	-2.12394	0.00177648	0.123818	Down	6.08987	1.22365	LOC100247506	SCPL50; At1g15000; T15D22.4, T15D22.7	PREDICTED: serine carboxypeptidase-like 50 [Vitis vinifera]	GO:0004185,GO:0005576,GO:0005773,GO:0051603	serine-type carboxypeptidase activity|extracellular region|vacuole|proteolysis involved in cellular protein catabolic process
chr1	4556001	4557000	0.149	0.542	1013	7	740	1	0.56	0.69	0.14	VIT_201s0011g04900	VIT_201s0011g04900	110.4	179.597	41.2033	0.22942	-2.12394	0.00177648	0.123818	Down	6.08987	1.22365	LOC100247506	SCPL50; At1g15000; T15D22.4, T15D22.7	PREDICTED: serine carboxypeptidase-like 50 [Vitis vinifera]	GO:0004185,GO:0005576,GO:0005773,GO:0051603	serine-type carboxypeptidase activity|extracellular region|vacuole|proteolysis involved in cellular protein catabolic process
chr1	4557001	4558000	0.277	0.751	157	0	234	3	-1.28	0	1.28	VIT_201s0011g04900	VIT_201s0011g04900	110.4	179.597	41.2033	0.22942	-2.12394	0.00177648	0.123818	Down	6.08987	1.22365	LOC100247506	SCPL50; At1g15000; T15D22.4, T15D22.7	PREDICTED: serine carboxypeptidase-like 50 [Vitis vinifera]	GO:0004185,GO:0005576,GO:0005773,GO:0051603	serine-type carboxypeptidase activity|extracellular region|vacuole|proteolysis involved in cellular protein catabolic process
chr1	4659001	4660000	1	1	10	0	71	1	-1.41	0	1.41	VIT_201s0011g04990	VIT_201s0011g04990	35.5823	66.0142	5.15041	0.0780198	-3.68002	0.00171284	0.12058	Down	1.68119	0.158606	LOC100264459	CPN10; At1g14980; T15D22.2	PREDICTED: 10 kDa chaperonin [Vitis vinifera]	GO:0005507,GO:0005524,GO:0005739,GO:0005759,GO:0006986,GO:0009408,GO:0051082,GO:0051085,GO:0051087	copper ion binding|ATP binding|mitochondrion|mitochondrial matrix|response to unfolded protein|response to heat|unfolded protein binding|chaperone cofactor-dependent protein refolding|chaperone binding
chr1	4661001	4662000	0.0149	0.126	141	5	295	1	3.21	3.55	0.34	VIT_201s0011g04990	VIT_201s0011g04990	35.5823	66.0142	5.15041	0.0780198	-3.68002	0.00171284	0.12058	Down	1.68119	0.158606	LOC100264459	CPN10; At1g14980; T15D22.2	PREDICTED: 10 kDa chaperonin [Vitis vinifera]	GO:0005507,GO:0005524,GO:0005739,GO:0005759,GO:0006986,GO:0009408,GO:0051082,GO:0051085,GO:0051087	copper ion binding|ATP binding|mitochondrion|mitochondrial matrix|response to unfolded protein|response to heat|unfolded protein binding|chaperone cofactor-dependent protein refolding|chaperone binding
chr1	4663001	4664000	1	1	164	3	20	0	1.83	1.83	0	VIT_201s0011g04990	VIT_201s0011g04990	35.5823	66.0142	5.15041	0.0780198	-3.68002	0.00171284	0.12058	Down	1.68119	0.158606	LOC100264459	CPN10; At1g14980; T15D22.2	PREDICTED: 10 kDa chaperonin [Vitis vinifera]	GO:0005507,GO:0005524,GO:0005739,GO:0005759,GO:0006986,GO:0009408,GO:0051082,GO:0051085,GO:0051087	copper ion binding|ATP binding|mitochondrion|mitochondrial matrix|response to unfolded protein|response to heat|unfolded protein binding|chaperone cofactor-dependent protein refolding|chaperone binding
chr1	5302001	5303000	1	1	370	2	171	0	0.54	0.54	0	VIT_201s0011g05580	VIT_201s0011g05580	156.202	214.546	97.8578	0.456116	-1.13253	0.047906	1	Down	2.5585	1.07931	LOC100247349	RLK902; At3g17840; MEB5.6	PREDICTED: probable inactive receptor kinase RLK902 [Vitis vinifera]
chr1	5307001	5308000	1	1	30	0	170	1	-0.59	0	0.59	VIT_201s0011g05580	VIT_201s0011g05580	156.202	214.546	97.8578	0.456116	-1.13253	0.047906	1	Down	2.5585	1.07931	LOC100247349	RLK902; At3g17840; MEB5.6	PREDICTED: probable inactive receptor kinase RLK902 [Vitis vinifera]
chr1	5852001	5853000	1	1	50	0	176	3	-1.7	0	1.7	VIT_201s0011g06080	VIT_201s0011g06080	146.813	218.429	75.196	0.344258	-1.53844	0.00952012	0.424553	Down	2.93811	0.952909	LOC100264487	At1g34300; F23M19.5	PREDICTED: G-type lectin S-receptor-like serine/threonine-protein kinase At1g34300 [Vitis vinifera]
chr1	12220001	12221000	0.552	1	396	2	202	0	0.51	0.51	0	VIT_201s0026g02590	VIT_201s0026g02590	238.734	446.566	30.9025	0.0692001	-3.85308	4.58832e-12	2.41449e-09	Down	21.0352	0.866566	LOC100248178	CML30; At3g29000; K5K13.13	PREDICTED: probable calcium-binding protein CML30 [Vitis vinifera]	GO:0005509	calcium ion binding
chr1	15952001	15953000	1	1	30	0	218	1	-0.46	0	0.46	VIT_201s0010g00760	VIT_201s0010g00760	19.4456	37.8611	1.03008	0.0272069	-5.19988	0.00330761	0.196672	Down	1.13385	0.0306976			unnamed protein product, partial [Vitis vinifera]
chr1	16079001	16080000	0.374	0.861	421	11	60	0	2.61	2.61	0	VIT_201s0010g00790	VIT_201s0010g00790	44.1712	88.3425	0	0	#NAME?	7.00104e-07	0.000133968	Down	4.75637	0			PREDICTED: uncharacterized protein LOC103341994 [Prunus mume]
chr1	19544001	19545000	1	1	287	7	20	0	2.44	2.44	0	VIT_201s0010g02460	VIT_201s0010g02460	1322.69	1853.25	792.133	0.427429	-1.22624	1.8469e-05	0.00257452	Down	47.3222	18.6273	LOC100264789	GAPC2; Synonyms=GAPDH; Os04g0486600, LOC_Os04g40950; H0302E05.3, OJ000223_09.15	PREDICTED: glyceraldehyde-3-phosphate dehydrogenase, cytosolic [Vitis vinifera]	GO:0004365,GO:0005737,GO:0006006,GO:0006096,GO:0050661,GO:0051287	glyceraldehyde-3-phosphate dehydrogenase (NAD+) (phosphorylating) activity|cytoplasm|glucose metabolic process|glycolytic process|NADP binding|NAD binding	path:vvi00010,path:vvi00710	Glycolysis / Gluconeogenesis|Carbon fixation in photosynthetic organisms
chr1	19802001	19803000	1	1	61	0	382	3	-0.79	0	0.79	VIT_201s0010g02770	VIT_201s0010g02770	18.9898	35.9195	2.06016	0.0573551	-4.12394	0.00991865	0.434049	Down	1.08854	0.0386789	LOC100240759	ADK-B; Os11g0312400 {ECO:0000312|EMBL:BAT13742.1}, LOC_Os11g20790 {ECO:0000305}; and OrderedLocusNames=Os11g0312220 {ECO:0000312|EMBL:BAT13739.1}	unnamed protein product, partial [Vitis vinifera]	GO:0004017,GO:0005524,GO:0005737,GO:0006163	adenylate kinase activity|ATP binding|cytoplasm|purine nucleotide metabolic process	path:vvi00230,path:vvi00730	Purine metabolism|Thiamine metabolism
chr1	19809001	19810000	0.0028	0.0385	80	5	871	8	5.33	6.25	0.92	VIT_201s0010g02770	VIT_201s0010g02770	18.9898	35.9195	2.06016	0.0573551	-4.12394	0.00991865	0.434049	Down	1.08854	0.0386789	LOC100240759	ADK-B; Os11g0312400 {ECO:0000312|EMBL:BAT13742.1}, LOC_Os11g20790 {ECO:0000305}; and OrderedLocusNames=Os11g0312220 {ECO:0000312|EMBL:BAT13739.1}	unnamed protein product, partial [Vitis vinifera]	GO:0004017,GO:0005524,GO:0005737,GO:0006163	adenylate kinase activity|ATP binding|cytoplasm|purine nucleotide metabolic process	path:vvi00230,path:vvi00730	Purine metabolism|Thiamine metabolism
chr1	19812001	19813000	2.88e-07	2.18e-05	80	21	170	6	22.72	26.25	3.53	VIT_201s0010g02770	VIT_201s0010g02770	18.9898	35.9195	2.06016	0.0573551	-4.12394	0.00991865	0.434049	Down	1.08854	0.0386789	LOC100240759	ADK-B; Os11g0312400 {ECO:0000312|EMBL:BAT13742.1}, LOC_Os11g20790 {ECO:0000305}; and OrderedLocusNames=Os11g0312220 {ECO:0000312|EMBL:BAT13739.1}	unnamed protein product, partial [Vitis vinifera]	GO:0004017,GO:0005524,GO:0005737,GO:0006163	adenylate kinase activity|ATP binding|cytoplasm|purine nucleotide metabolic process	path:vvi00230,path:vvi00730	Purine metabolism|Thiamine metabolism
chr1	19813001	19814000	1	1	272	1	30	0	0.37	0.37	0	VIT_201s0010g02770	VIT_201s0010g02770	18.9898	35.9195	2.06016	0.0573551	-4.12394	0.00991865	0.434049	Down	1.08854	0.0386789	LOC100240759	ADK-B; Os11g0312400 {ECO:0000312|EMBL:BAT13742.1}, LOC_Os11g20790 {ECO:0000305}; and OrderedLocusNames=Os11g0312220 {ECO:0000312|EMBL:BAT13739.1}	unnamed protein product, partial [Vitis vinifera]	GO:0004017,GO:0005524,GO:0005737,GO:0006163	adenylate kinase activity|ATP binding|cytoplasm|purine nucleotide metabolic process	path:vvi00230,path:vvi00730	Purine metabolism|Thiamine metabolism
chr1	20852001	20853000	0.429	0.921	191	1	254	0	0.52	0.52	0	VIT_201s0010g03510	VIT_201s0010g03510	548.333	309.684	786.983	2.54124	1.34553	0.000207235	0.0204793	Up	14.2066	35.457	LOC100250567	FAOMT	unnamed protein product, partial [Vitis vinifera]	GO:0005737,GO:0008171,GO:0009718,GO:0033485,GO:0033486,GO:0043473,GO:0046872	cytoplasm|O-methyltransferase activity|anthocyanin-containing compound biosynthetic process|cyanidin 3-O-glucoside biosynthetic process|delphinidin 3-O-glucoside biosynthetic process|pigmentation|metal ion binding	path:vvi00944	Flavone and flavonol biosynthesis
chr1	20880001	20881000	1	1	119	1	101	0	0.84	0.84	0	VIT_201s0010g03540	VIT_201s0010g03540	7.21057	0	14.4211	Inf	Inf	0.0445414	1	Up	0	0.137182	LOC100264256	MAP65-8; At1g27920; F13K9.3	unnamed protein product, partial [Vitis vinifera]	GO:0000226,GO:0000910,GO:0000922,GO:0005634,GO:0005819,GO:0005874,GO:0008017,GO:0009524	microtubule cytoskeleton organization|cytokinesis|spindle pole|nucleus|spindle|microtubule|microtubule binding|phragmoplast
chr1	20883001	20884000	1	1	371	1	61	0	0.27	0.27	0	VIT_201s0010g03540	VIT_201s0010g03540	7.21057	0	14.4211	Inf	Inf	0.0445414	1	Up	0	0.137182	LOC100264256	MAP65-8; At1g27920; F13K9.3	unnamed protein product, partial [Vitis vinifera]	GO:0000226,GO:0000910,GO:0000922,GO:0005634,GO:0005819,GO:0005874,GO:0008017,GO:0009524	microtubule cytoskeleton organization|cytokinesis|spindle pole|nucleus|spindle|microtubule|microtubule binding|phragmoplast
chr1	21460001	21461000	1	1	10	0	480	1	-0.21	0	0.21	VIT_201s0010g03930	VIT_201s0010g03930	478.366	695.09	261.641	0.376413	-1.40961	0.000206971	0.0204793	Down	28.2724	10.0872	LOC100254080	WRKY75; At5g13080; T19L5.40	PREDICTED: probable WRKY transcription factor 75 [Vitis vinifera]	GO:0000122,GO:0000978,GO:0003700,GO:0005634,GO:0006351,GO:0010055,GO:0032107,GO:0043620,GO:0044212,GO:0048527	negative regulation of transcription from RNA polymerase II promoter|RNA polymerase II proximal promoter sequence-specific DNA binding|DNA binding transcription factor activity|nucleus|transcription, DNA-templated|atrichoblast differentiation|regulation of response to nutrient levels|regulation of DNA-templated transcription in response to stress|transcription regulatory region DNA binding|latera…
chr1	21462001	21463000	0.171	0.586	377	4	498	1	0.86	1.06	0.2	VIT_201s0010g03930	VIT_201s0010g03930	478.366	695.09	261.641	0.376413	-1.40961	0.000206971	0.0204793	Down	28.2724	10.0872	LOC100254080	WRKY75; At5g13080; T19L5.40	PREDICTED: probable WRKY transcription factor 75 [Vitis vinifera]	GO:0000122,GO:0000978,GO:0003700,GO:0005634,GO:0006351,GO:0010055,GO:0032107,GO:0043620,GO:0044212,GO:0048527	negative regulation of transcription from RNA polymerase II promoter|RNA polymerase II proximal promoter sequence-specific DNA binding|DNA binding transcription factor activity|nucleus|transcription, DNA-templated|atrichoblast differentiation|regulation of response to nutrient levels|regulation of DNA-templated transcription in response to stress|transcription regulatory region DNA binding|latera…
chr1	21463001	21464000	0.00497	0.0585	544	17	215	0	3.12	3.12	0	VIT_201s0010g03930	VIT_201s0010g03930	478.366	695.09	261.641	0.376413	-1.40961	0.000206971	0.0204793	Down	28.2724	10.0872	LOC100254080	WRKY75; At5g13080; T19L5.40	PREDICTED: probable WRKY transcription factor 75 [Vitis vinifera]	GO:0000122,GO:0000978,GO:0003700,GO:0005634,GO:0006351,GO:0010055,GO:0032107,GO:0043620,GO:0044212,GO:0048527	negative regulation of transcription from RNA polymerase II promoter|RNA polymerase II proximal promoter sequence-specific DNA binding|DNA binding transcription factor activity|nucleus|transcription, DNA-templated|atrichoblast differentiation|regulation of response to nutrient levels|regulation of DNA-templated transcription in response to stress|transcription regulatory region DNA binding|latera…
chr2	154001	155000	1	1	23	0	327	6	-1.83	0	1.83	VIT_202s0234g00120	VIT_202s0234g00120	35.6379	13.5912	57.6846	4.24427	2.08552	0.0469777	1	Up	0.096752	0.737376	LOC100241435	CSN7; Synonyms=FUS5; At1g02090; T7I23.24, T7I23.25	unnamed protein product, partial [Vitis vinifera]	GO:0000338,GO:0005829,GO:0007275,GO:0008180,GO:0009585,GO:0010387	protein deneddylation|cytosol|multicellular organism development|COP9 signalosome|red, far-red light phototransduction|COP9 signalosome assembly
chr2	157001	158000	0.137	0.517	379	0	60	1	-1.67	0	1.67	VIT_202s0234g00120	VIT_202s0234g00120	35.6379	13.5912	57.6846	4.24427	2.08552	0.0469777	1	Up	0.096752	0.737376	LOC100241435	CSN7; Synonyms=FUS5; At1g02090; T7I23.24, T7I23.25	unnamed protein product, partial [Vitis vinifera]	GO:0000338,GO:0005829,GO:0007275,GO:0008180,GO:0009585,GO:0010387	protein deneddylation|cytosol|multicellular organism development|COP9 signalosome|red, far-red light phototransduction|COP9 signalosome assembly
chr2	158001	159000	0.000854	0.0157	134	13	207	3	8.25	9.7	1.45	VIT_202s0234g00120	VIT_202s0234g00120	35.6379	13.5912	57.6846	4.24427	2.08552	0.0469777	1	Up	0.096752	0.737376	LOC100241435	CSN7; Synonyms=FUS5; At1g02090; T7I23.24, T7I23.25	unnamed protein product, partial [Vitis vinifera]	GO:0000338,GO:0005829,GO:0007275,GO:0008180,GO:0009585,GO:0010387	protein deneddylation|cytosol|multicellular organism development|COP9 signalosome|red, far-red light phototransduction|COP9 signalosome assembly
chr2	167001	168000	0.0972	0.425	287	6	152	0	2.09	2.09	0	VIT_202s0234g00120	VIT_202s0234g00120	35.6379	13.5912	57.6846	4.24427	2.08552	0.0469777	1	Up	0.096752	0.737376	LOC100241435	CSN7; Synonyms=FUS5; At1g02090; T7I23.24, T7I23.25	unnamed protein product, partial [Vitis vinifera]	GO:0000338,GO:0005829,GO:0007275,GO:0008180,GO:0009585,GO:0010387	protein deneddylation|cytosol|multicellular organism development|COP9 signalosome|red, far-red light phototransduction|COP9 signalosome assembly
chr2	168001	169000	1	1	10	0	229	10	-4.37	0	4.37	VIT_202s0234g00120	VIT_202s0234g00120	35.6379	13.5912	57.6846	4.24427	2.08552	0.0469777	1	Up	0.096752	0.737376	LOC100241435	CSN7; Synonyms=FUS5; At1g02090; T7I23.24, T7I23.25	unnamed protein product, partial [Vitis vinifera]	GO:0000338,GO:0005829,GO:0007275,GO:0008180,GO:0009585,GO:0010387	protein deneddylation|cytosol|multicellular organism development|COP9 signalosome|red, far-red light phototransduction|COP9 signalosome assembly
chr2	174001	175000	1	1	77	0	371	1	-0.27	0	0.27	VIT_202s0234g00120	VIT_202s0234g00120	35.6379	13.5912	57.6846	4.24427	2.08552	0.0469777	1	Up	0.096752	0.737376	LOC100241435	CSN7; Synonyms=FUS5; At1g02090; T7I23.24, T7I23.25	unnamed protein product, partial [Vitis vinifera]	GO:0000338,GO:0005829,GO:0007275,GO:0008180,GO:0009585,GO:0010387	protein deneddylation|cytosol|multicellular organism development|COP9 signalosome|red, far-red light phototransduction|COP9 signalosome assembly
chr2	176001	177000	0.219	0.667	1004	9	279	0	0.9	0.9	0	VIT_202s0234g00120	VIT_202s0234g00120	35.6379	13.5912	57.6846	4.24427	2.08552	0.0469777	1	Up	0.096752	0.737376	LOC100241435	CSN7; Synonyms=FUS5; At1g02090; T7I23.24, T7I23.25	unnamed protein product, partial [Vitis vinifera]	GO:0000338,GO:0005829,GO:0007275,GO:0008180,GO:0009585,GO:0010387	protein deneddylation|cytosol|multicellular organism development|COP9 signalosome|red, far-red light phototransduction|COP9 signalosome assembly
chr2	457001	458000	0.000133	0.00368	50	7	121	0	14	14	0	VIT_202s0025g00350	VIT_202s0025g00350	146.638	274.735	18.5415	0.0674885	-3.88922	9.93609e-09	2.75372e-06	Down	3.52771	0.369742	LOC100258716	HIPP39 {ECO:0000303|PubMed:21072340, ECO:0000303|PubMed:23368984}; At1g01490 {ECO:0000312|Araport:AT1G01490}; F22L4.5 {ECO:0000312|EMBL:AAF81309.1}	PREDICTED: uncharacterized protein LOC100258716 [Vitis vinifera]	GO:0005737,GO:0030001,GO:0046914,GO:0046916	cytoplasm|metal ion transport|transition metal ion binding|cellular transition metal ion homeostasis
chr2	471001	472000	1	1	452	1	50	0	0.22	0.22	0	VIT_202s0025g00360	VIT_202s0025g00360	131.658	208.721	54.5943	0.261566	-1.93475	0.00209527	0.138864	Down	4.05469	0.889265	LOC100263876	ACS1	PREDICTED: 1-aminocyclopropane-1-carboxylate synthase [Vitis vinifera]	GO:0009693,GO:0009835,GO:0016847,GO:0030170	ethylene biosynthetic process|fruit ripening|1-aminocyclopropane-1-carboxylate synthase activity|pyridoxal phosphate binding	path:vvi00270,path:vvi04016	Cysteine and methionine metabolism|MAPK signaling pathway - plant
chr2	1231001	1232000	0.393	0.88	139	0	90	1	-1.11	0	1.11	VIT_202s0025g01280	VIT_202s0025g01280	47.7172	90.2841	5.15041	0.0570467	-4.13171	0.000134029	0.0144676	Down	1.00107	0.0575919	LOC100253577	WRKY53; At4g23810; F9D16.280	PREDICTED: probable WRKY transcription factor 41 [Vitis vinifera]	GO:0003677,GO:0003700,GO:0005634,GO:0006351,GO:0009507,GO:0009751,GO:0009816,GO:0010150,GO:0010193,GO:0010200,GO:0031347,GO:0042542,GO:0043565,GO:0045893	DNA binding|DNA binding transcription factor activity|nucleus|transcription, DNA-templated|chloroplast|response to salicylic acid|defense response to bacterium, incompatible interaction|leaf senescence|response to ozone|response to chitin|regulation of defense response|response to hydrogen peroxide|sequence-specific DNA binding|positive regulation of transcription, DNA-templated
chr2	3146001	3147000	1	1	424	1	20	0	0.24	0.24	0	VIT_202s0025g03610	VIT_202s0025g03610	47.821	19.4159	76.2261	3.92595	1.97304	0.0338075	1	Up	0.149408	0.55227	LOC100264973	FTIP1 {ECO:0000303|PubMed:22529749}; At5g06850 {ECO:0000312|Araport:AT5G06850}; MOJ9.2 {ECO:0000312|EMBL:BAB11143.1}	PREDICTED: uncharacterized protein LOC100264973 [Vitis vinifera]	GO:0005783,GO:0005789,GO:0008565,GO:0009506,GO:0009511,GO:0009908,GO:0009911,GO:0010228,GO:0016021,GO:0016757,GO:0034613,GO:0048574	endoplasmic reticulum|endoplasmic reticulum membrane|protein transporter activity|plasmodesma|plasmodesmatal endoplasmic reticulum|flower development|positive regulation of flower development|vegetative to reproductive phase transition of meristem|integral component of membrane|transferase activity, transferring glycosyl groups|cellular protein localization|long-day photoperiodism, flowering
chr2	3148001	3149000	1	1	546	2	71	0	0.37	0.37	0	VIT_202s0025g03610	VIT_202s0025g03610	47.821	19.4159	76.2261	3.92595	1.97304	0.0338075	1	Up	0.149408	0.55227	LOC100264973	FTIP1 {ECO:0000303|PubMed:22529749}; At5g06850 {ECO:0000312|Araport:AT5G06850}; MOJ9.2 {ECO:0000312|EMBL:BAB11143.1}	PREDICTED: uncharacterized protein LOC100264973 [Vitis vinifera]	GO:0005783,GO:0005789,GO:0008565,GO:0009506,GO:0009511,GO:0009908,GO:0009911,GO:0010228,GO:0016021,GO:0016757,GO:0034613,GO:0048574	endoplasmic reticulum|endoplasmic reticulum membrane|protein transporter activity|plasmodesma|plasmodesmatal endoplasmic reticulum|flower development|positive regulation of flower development|vegetative to reproductive phase transition of meristem|integral component of membrane|transferase activity, transferring glycosyl groups|cellular protein localization|long-day photoperiodism, flowering
chr2	3149001	3150000	1	1	61	0	565	4	-0.71	0	0.71	VIT_202s0025g03610	VIT_202s0025g03610	47.821	19.4159	76.2261	3.92595	1.97304	0.0338075	1	Up	0.149408	0.55227	LOC100264973	FTIP1 {ECO:0000303|PubMed:22529749}; At5g06850 {ECO:0000312|Araport:AT5G06850}; MOJ9.2 {ECO:0000312|EMBL:BAB11143.1}	PREDICTED: uncharacterized protein LOC100264973 [Vitis vinifera]	GO:0005783,GO:0005789,GO:0008565,GO:0009506,GO:0009511,GO:0009908,GO:0009911,GO:0010228,GO:0016021,GO:0016757,GO:0034613,GO:0048574	endoplasmic reticulum|endoplasmic reticulum membrane|protein transporter activity|plasmodesma|plasmodesmatal endoplasmic reticulum|flower development|positive regulation of flower development|vegetative to reproductive phase transition of meristem|integral component of membrane|transferase activity, transferring glycosyl groups|cellular protein localization|long-day photoperiodism, flowering
chr2	3152001	3153000	0.126	0.494	51	1	731	1	1.82	1.96	0.14	VIT_202s0025g03610	VIT_202s0025g03610	47.821	19.4159	76.2261	3.92595	1.97304	0.0338075	1	Up	0.149408	0.55227	LOC100264973	FTIP1 {ECO:0000303|PubMed:22529749}; At5g06850 {ECO:0000312|Araport:AT5G06850}; MOJ9.2 {ECO:0000312|EMBL:BAB11143.1}	PREDICTED: uncharacterized protein LOC100264973 [Vitis vinifera]	GO:0005783,GO:0005789,GO:0008565,GO:0009506,GO:0009511,GO:0009908,GO:0009911,GO:0010228,GO:0016021,GO:0016757,GO:0034613,GO:0048574	endoplasmic reticulum|endoplasmic reticulum membrane|protein transporter activity|plasmodesma|plasmodesmatal endoplasmic reticulum|flower development|positive regulation of flower development|vegetative to reproductive phase transition of meristem|integral component of membrane|transferase activity, transferring glycosyl groups|cellular protein localization|long-day photoperiodism, flowering
chr2	3655001	3656000	1	1	40	0	210	3	-1.43	0	1.43	VIT_202s0025g04130	VIT_202s0025g04130	160.018	258.232	61.8049	0.239339	-2.06287	0.000427094	0.037458	Down	6.61549	1.65127	LOC100241085	RBL2 {ECO:0000303|PubMed:16223493, ECO:0000303|PubMed:17181860}; At1g63120 {ECO:0000312|Araport:AT1G63120}; F16M19.4 {ECO:0000312|EMBL:AAG51610.1}	PREDICTED: inactive rhomboid protein 1 [Vitis vinifera]	GO:0000139,GO:0004252,GO:0005794,GO:0009506,GO:0016021	Golgi membrane|serine-type endopeptidase activity|Golgi apparatus|plasmodesma|integral component of membrane
chr2	3656001	3657000	0.391	0.878	403	15	50	0	3.72	3.72	0	VIT_202s0025g04130	VIT_202s0025g04130	160.018	258.232	61.8049	0.239339	-2.06287	0.000427094	0.037458	Down	6.61549	1.65127	LOC100241085	RBL2 {ECO:0000303|PubMed:16223493, ECO:0000303|PubMed:17181860}; At1g63120 {ECO:0000312|Araport:AT1G63120}; F16M19.4 {ECO:0000312|EMBL:AAG51610.1}	PREDICTED: inactive rhomboid protein 1 [Vitis vinifera]	GO:0000139,GO:0004252,GO:0005794,GO:0009506,GO:0016021	Golgi membrane|serine-type endopeptidase activity|Golgi apparatus|plasmodesma|integral component of membrane
chr2	3775001	3776000	1	1	70	0	195	1	-0.51	0	0.51	VIT_202s0025g04250	VIT_202s0025g04250	18.4451	36.8903	0	0	#NAME?	0.00103355	0.0793983	Down	1.84232	0	LOC100249610	tlp	PREDICTED: protein P21-like [Vitis vinifera]	GO:0005576,GO:0031640,GO:0050832	extracellular region|killing of cells of other organism|defense response to fungus
chr2	3982001	3983000	0.0951	0.42	476	0	50	1	-2	0	2	VIT_202s0025g04490	VIT_202s0025g04490	56.4433	91.2549	21.6317	0.237047	-2.07675	0.0180196	0.674902	Down	1.45173	0.111307	LOC100256411	UTR4; At1g12600; F5O11.33, T12C24.13	hypothetical protein CISIN_1g018484mg [Citrus sinensis]	GO:0008643,GO:0015297,GO:0030173,GO:0030176,GO:0046964	carbohydrate transport|antiporter activity|integral component of Golgi membrane|integral component of endoplasmic reticulum membrane|3'-phosphoadenosine 5'-phosphosulfate transmembrane transporter activity
chr2	4578001	4579000	1	1	63	0	364	4	-1.1	0	1.1	VIT_202s0025g05110	VIT_202s0025g05110	106.706	47.569	165.843	3.48637	1.80173	0.0078383	0.366641	Up	1.51054	4.71499	LOC100251249	DTX56 {ECO:0000303|PubMed:11739388}; Synonyms=RHC1 {ECO:0000303|PubMed:25599916}; At4g22790 {ECO:0000312|Araport:AT4G22790}; T12H17.180 {ECO:0000312|EMBL:CAA16564.1}	PREDICTED: MATE efflux family protein 5 [Vitis vinifera]	GO:0005886,GO:0006855,GO:0015238,GO:0015297,GO:0016021,GO:0071244,GO:1902456	plasma membrane|drug transmembrane transport|drug transmembrane transporter activity|antiporter activity|integral component of membrane|cellular response to carbon dioxide|regulation of stomatal opening
chr2	5380001	5381000	0.109	0.453	82	0	10	1	-10	0	10	VIT_202s0154g00600	VIT_202s0154g00600	8.25177	16.5035	0	0	#NAME?	0.0327809	0.981515	Down	0.0783995	0	LOC100259241	PME68; Synonyms=ARATH68; At5g47500; MNJ7.9	PREDICTED: probable pectinesterase 68 [Vitis vinifera]	GO:0005576,GO:0005618,GO:0030599,GO:0042545,GO:0045330,GO:0045490	extracellular region|cell wall|pectinesterase activity|cell wall modification|aspartyl esterase activity|pectin catabolic process
chr2	5534001	5535000	1	1	30	0	542	3	-0.55	0	0.55	VIT_202s0236g00100	VIT_202s0236g00100	152.293	258.232	46.3537	0.179504	-2.47791	4.81132e-05	0.00610081	Down	18.859	2.82311	LOC100853220		PREDICTED: uncharacterized protein LOC100853220 [Vitis vinifera]
chr2	6407001	6408000	0.302	0.785	181	0	317	4	-1.26	0	1.26	VIT_202s0012g00550	VIT_202s0012g00550	150.944	234.933	66.9553	0.284998	-1.81098	0.0022514	0.145815	Down	1.93932	0.469472	LOC100267737	IP5P2 {ECO:0000303|PubMed:11340187}; Synonyms=5P2 {ECO:0000303|Ref.3}; At4g18010 {ECO:0000312|Araport:AT4G18010}; T6K21.190 {ECO:0000312|EMBL:CAA17144.1}	PREDICTED: type I inositol 1,4,5-trisphosphate 5-phosphatase 2 isoform X2 [Vitis vinifera]	GO:0004439,GO:0004445,GO:0009737,GO:0009738,GO:0009845,GO:0032957,GO:0034485,GO:0046855,GO:0046856,GO:0052658,GO:0052659,GO:0090351	phosphatidylinositol-4,5-bisphosphate 5-phosphatase activity|inositol-polyphosphate 5-phosphatase activity|response to abscisic acid|abscisic acid-activated signaling pathway|seed germination|inositol trisphosphate metabolic process|phosphatidylinositol-3,4,5-trisphosphate 5-phosphatase activity|inositol phosphate dephosphorylation|phosphatidylinositol dephosphorylation|inositol-1,4,5-trisphospha…
chr2	6409001	6410000	1	1	1086	9	10	0	0.83	0.83	0	VIT_202s0012g00550	VIT_202s0012g00550	150.944	234.933	66.9553	0.284998	-1.81098	0.0022514	0.145815	Down	1.93932	0.469472	LOC100267737	IP5P2 {ECO:0000303|PubMed:11340187}; Synonyms=5P2 {ECO:0000303|Ref.3}; At4g18010 {ECO:0000312|Araport:AT4G18010}; T6K21.190 {ECO:0000312|EMBL:CAA17144.1}	PREDICTED: type I inositol 1,4,5-trisphosphate 5-phosphatase 2 isoform X2 [Vitis vinifera]	GO:0004439,GO:0004445,GO:0009737,GO:0009738,GO:0009845,GO:0032957,GO:0034485,GO:0046855,GO:0046856,GO:0052658,GO:0052659,GO:0090351	phosphatidylinositol-4,5-bisphosphate 5-phosphatase activity|inositol-polyphosphate 5-phosphatase activity|response to abscisic acid|abscisic acid-activated signaling pathway|seed germination|inositol trisphosphate metabolic process|phosphatidylinositol-3,4,5-trisphosphate 5-phosphatase activity|inositol phosphate dephosphorylation|phosphatidylinositol dephosphorylation|inositol-1,4,5-trisphospha…
chr2	6412001	6413000	1	1	60	0	689	5	-0.73	0	0.73	VIT_202s0012g00550	VIT_202s0012g00550	150.944	234.933	66.9553	0.284998	-1.81098	0.0022514	0.145815	Down	1.93932	0.469472	LOC100267737	IP5P2 {ECO:0000303|PubMed:11340187}; Synonyms=5P2 {ECO:0000303|Ref.3}; At4g18010 {ECO:0000312|Araport:AT4G18010}; T6K21.190 {ECO:0000312|EMBL:CAA17144.1}	PREDICTED: type I inositol 1,4,5-trisphosphate 5-phosphatase 2 isoform X2 [Vitis vinifera]	GO:0004439,GO:0004445,GO:0009737,GO:0009738,GO:0009845,GO:0032957,GO:0034485,GO:0046855,GO:0046856,GO:0052658,GO:0052659,GO:0090351	phosphatidylinositol-4,5-bisphosphate 5-phosphatase activity|inositol-polyphosphate 5-phosphatase activity|response to abscisic acid|abscisic acid-activated signaling pathway|seed germination|inositol trisphosphate metabolic process|phosphatidylinositol-3,4,5-trisphosphate 5-phosphatase activity|inositol phosphate dephosphorylation|phosphatidylinositol dephosphorylation|inositol-1,4,5-trisphospha…
chr2	6704001	6705000	1	1	101	0	561	3	-0.53	0	0.53	VIT_202s0012g00830	VIT_202s0012g00830	34.6115	64.0726	5.15041	0.080384	-3.63695	0.00210395	0.138864	Down	0.853601	0.162367	LOC100262694	EXLB1; Synonyms=EXPR1; Os07g0496250, LOC_Os07g31390; OJ1457_D07.118, OsJ_023376	PREDICTED: expansin-like B1 [Vitis vinifera]
chr2	6707001	6708000	0.171	0.585	637	1	1153	8	-0.54	0.16	0.69	VIT_202s0012g00830	VIT_202s0012g00830	34.6115	64.0726	5.15041	0.080384	-3.63695	0.00210395	0.138864	Down	0.853601	0.162367	LOC100262694	EXLB1; Synonyms=EXPR1; Os07g0496250, LOC_Os07g31390; OJ1457_D07.118, OsJ_023376	PREDICTED: expansin-like B1 [Vitis vinifera]
chr2	7155001	7156000	0.341	0.828	381	5	124	0	1.31	1.31	0	VIT_202s0012g01140	VIT_202s0012g01140	152.756	91.2549	214.257	2.3479	1.23137	0.0331903	0.989551	Up	1.79776	3.90745	LOC100264404	At4g35230; F23E12.210	PREDICTED: probable serine/threonine-protein kinase At4g35230 [Vitis vinifera]			path:vvi04075	Plant hormone signal transduction
chr2	7156001	7157000	0.576	1	82	0	237	4	-1.69	0	1.69	VIT_202s0012g01140	VIT_202s0012g01140	152.756	91.2549	214.257	2.3479	1.23137	0.0331903	0.989551	Up	1.79776	3.90745	LOC100264404	At4g35230; F23E12.210	PREDICTED: probable serine/threonine-protein kinase At4g35230 [Vitis vinifera]			path:vvi04075	Plant hormone signal transduction
chr2	7159001	7160000	0.487	0.979	20	0	20	2	-10	0	10	VIT_202s0012g01140	VIT_202s0012g01140	152.756	91.2549	214.257	2.3479	1.23137	0.0331903	0.989551	Up	1.79776	3.90745	LOC100264404	At4g35230; F23E12.210	PREDICTED: probable serine/threonine-protein kinase At4g35230 [Vitis vinifera]			path:vvi04075	Plant hormone signal transduction
chr2	8574001	8575000	0.555	1	201	3	110	0	1.49	1.49	0	VIT_202s0012g01960	VIT_202s0012g01960	29.2721	53.3938	5.15041	0.0964608	-3.37391	0.00655094	0.325983	Down	0.762334	0.0786515	LOC100266131	JMJ706; Os10g0577600, LOC_Os10g42690; OSJNBa0035H01.2	PREDICTED: lysine-specific demethylase JMJ706 isoform X1 [Vitis vinifera]	GO:0000792,GO:0005634,GO:0006351,GO:0006355,GO:0032454,GO:0045815,GO:0046872,GO:0048439,GO:0051213	heterochromatin|nucleus|transcription, DNA-templated|regulation of transcription, DNA-templated|histone demethylase activity (H3-K9 specific)|positive regulation of gene expression, epigenetic|metal ion binding|flower morphogenesis|dioxygenase activity
chr2	8579001	8580000	0.00827	0.0839	159	1	204	12	-5.25	0.63	5.88	VIT_202s0012g01960	VIT_202s0012g01960	29.2721	53.3938	5.15041	0.0964608	-3.37391	0.00655094	0.325983	Down	0.762334	0.0786515	LOC100266131	JMJ706; Os10g0577600, LOC_Os10g42690; OSJNBa0035H01.2	PREDICTED: lysine-specific demethylase JMJ706 isoform X1 [Vitis vinifera]	GO:0000792,GO:0005634,GO:0006351,GO:0006355,GO:0032454,GO:0045815,GO:0046872,GO:0048439,GO:0051213	heterochromatin|nucleus|transcription, DNA-templated|regulation of transcription, DNA-templated|histone demethylase activity (H3-K9 specific)|positive regulation of gene expression, epigenetic|metal ion binding|flower morphogenesis|dioxygenase activity
chr2	16899001	16900000	0.134	0.511	10	1	274	3	8.91	10	1.09	VIT_202s0033g01380	VIT_202s0033g01380	171.353	308.713	33.9927	0.110111	-3.18297	1.54747e-07	3.46519e-05	Down	7.65316	0.784024	LOC100247765	AOX3; Synonyms=AOX1D; At1g32350; F27G20_12, F5D14.11	PREDICTED: ubiquinol oxidase 2, mitochondrial [Vitis vinifera]	GO:0005743,GO:0009916,GO:0016021,GO:0046872,GO:0070469,GO:0102721	mitochondrial inner membrane|alternative oxidase activity|integral component of membrane|metal ion binding|respiratory chain|ubiquinol:oxygen oxidoreductase activity
chr2	16901001	16902000	1	1	40	0	85	2	-2.35	0	2.35	VIT_202s0033g01380	VIT_202s0033g01380	171.353	308.713	33.9927	0.110111	-3.18297	1.54747e-07	3.46519e-05	Down	7.65316	0.784024	LOC100247765	AOX3; Synonyms=AOX1D; At1g32350; F27G20_12, F5D14.11	PREDICTED: ubiquinol oxidase 2, mitochondrial [Vitis vinifera]	GO:0005743,GO:0009916,GO:0016021,GO:0046872,GO:0070469,GO:0102721	mitochondrial inner membrane|alternative oxidase activity|integral component of membrane|metal ion binding|respiratory chain|ubiquinol:oxygen oxidoreductase activity
chr2	16903001	16904000	0.127	0.496	50	2	255	2	3.22	4	0.78	VIT_202s0033g01390	VIT_202s0033g01390	72.9061	108.729	37.0829	0.341058	-1.55191	0.0462643	1	Down	6.25461	1.45866	LOC100252878		unnamed protein product, partial [Vitis vinifera]
chr2	16903001	16904000	0.127	0.496	50	2	255	2	3.22	4	0.78	VIT_202s0033g01400	VIT_202s0033g01400	514.063	706.74	321.386	0.454744	-1.13687	0.0020286	0.135556	Down	24.6909	11.1759	LOC100252878	AOX1A; Synonyms=AOX1, HSR3; At3g22370; MCB17.11	PREDICTED: ubiquinol oxidase 2, mitochondrial [Vitis vinifera]	GO:0005739,GO:0005743,GO:0009409,GO:0009916,GO:0016021,GO:0031930,GO:0045333,GO:0046872,GO:0070469,GO:0102721	mitochondrion|mitochondrial inner membrane|response to cold|alternative oxidase activity|integral component of membrane|mitochondria-nucleus signaling pathway|cellular respiration|metal ion binding|respiratory chain|ubiquinol:oxygen oxidoreductase activity
chr2	16904001	16905000	1	1	362	2	30	0	0.55	0.55	0	VIT_202s0033g01390	VIT_202s0033g01390	72.9061	108.729	37.0829	0.341058	-1.55191	0.0462643	1	Down	6.25461	1.45866	LOC100252878		unnamed protein product, partial [Vitis vinifera]
chr2	16904001	16905000	1	1	362	2	30	0	0.55	0.55	0	VIT_202s0033g01400	VIT_202s0033g01400	514.063	706.74	321.386	0.454744	-1.13687	0.0020286	0.135556	Down	24.6909	11.1759	LOC100252878	AOX1A; Synonyms=AOX1, HSR3; At3g22370; MCB17.11	PREDICTED: ubiquinol oxidase 2, mitochondrial [Vitis vinifera]	GO:0005739,GO:0005743,GO:0009409,GO:0009916,GO:0016021,GO:0031930,GO:0045333,GO:0046872,GO:0070469,GO:0102721	mitochondrion|mitochondrial inner membrane|response to cold|alternative oxidase activity|integral component of membrane|mitochondria-nucleus signaling pathway|cellular respiration|metal ion binding|respiratory chain|ubiquinol:oxygen oxidoreductase activity
chr2	18250001	18251000	0.489	0.981	115	0	110	1	-0.91	0	0.91	VIT_202s0087g00710	VIT_202s0087g00710	127.437	195.13	59.7447	0.306179	-1.70755	0.00682474	0.331764	Down	2.80049	0.745078	HYD2	CYP707A1; At4g19230; T18B16.200	hypodontia, autosomal recessive (2) [Vitis vinifera]	GO:0005506,GO:0010268,GO:0010295,GO:0016021,GO:0016125,GO:0016132,GO:0020037,GO:0046345	iron ion binding|brassinosteroid homeostasis|(+)-abscisic acid 8'-hydroxylase activity|integral component of membrane|sterol metabolic process|brassinosteroid biosynthetic process|heme binding|abscisic acid catabolic process	path:vvi00906	Carotenoid biosynthesis
chr2	18252001	18253000	1.08e-06	6.86e-05	287	57	75	0	19.86	19.86	0	VIT_202s0087g00710	VIT_202s0087g00710	127.437	195.13	59.7447	0.306179	-1.70755	0.00682474	0.331764	Down	2.80049	0.745078	HYD2	CYP707A1; At4g19230; T18B16.200	hypodontia, autosomal recessive (2) [Vitis vinifera]	GO:0005506,GO:0010268,GO:0010295,GO:0016021,GO:0016125,GO:0016132,GO:0020037,GO:0046345	iron ion binding|brassinosteroid homeostasis|(+)-abscisic acid 8'-hydroxylase activity|integral component of membrane|sterol metabolic process|brassinosteroid biosynthetic process|heme binding|abscisic acid catabolic process	path:vvi00906	Carotenoid biosynthesis
chr2	18745001	18746000	1	1	11	0	255	18	-7.06	0	7.06	VIT_202s0087g01010	VIT_202s0087g01010	302.196	476.661	127.73	0.267968	-1.89986	2.9169e-05	0.00393576	Down	16.059	3.06939	LOC104877547	CRK25; At4g05200; C17L7.120, C6L9.3	unnamed protein product, partial [Vitis vinifera]
chr2	18747001	18748000	0.0504	0.285	50	1	722	77	-8.66	2	10.66	VIT_202s0087g01010	VIT_202s0087g01010	302.196	476.661	127.73	0.267968	-1.89986	2.9169e-05	0.00393576	Down	16.059	3.06939	LOC104877547	CRK25; At4g05200; C17L7.120, C6L9.3	unnamed protein product, partial [Vitis vinifera]
chr2	18748001	18749000	1	1	21	0	489	22	-4.5	0	4.5	VIT_202s0087g01010	VIT_202s0087g01010	302.196	476.661	127.73	0.267968	-1.89986	2.9169e-05	0.00393576	Down	16.059	3.06939	LOC104877547	CRK25; At4g05200; C17L7.120, C6L9.3	unnamed protein product, partial [Vitis vinifera]
chr3	403001	404000	1	1	50	0	470	5	-1.06	0	1.06	VIT_203s0038g00430	VIT_203s0038g00430	69.3712	123.291	15.4512	0.125323	-2.99628	0.000453326	0.03943	Down	2.8229	0.322768	LOC100265746	DTX46 {ECO:0000303|PubMed:11739388}; Synonyms=EDS5H {ECO:0000303|PubMed:26055508}; At2g21340 {ECO:0000312|Araport:AT2G21340}; F3K23.10 {ECO:0000312|EMBL:AAD23682.2}	unnamed protein product, partial [Vitis vinifera]	GO:0009507,GO:0009941,GO:0015238,GO:0015297,GO:0016021,GO:0031969	chloroplast|chloroplast envelope|drug transmembrane transporter activity|antiporter activity|integral component of membrane|chloroplast membrane
chr3	405001	406000	1	1	389	3	21	0	0.77	0.77	0	VIT_203s0038g00430	VIT_203s0038g00430	69.3712	123.291	15.4512	0.125323	-2.99628	0.000453326	0.03943	Down	2.8229	0.322768	LOC100265746	DTX46 {ECO:0000303|PubMed:11739388}; Synonyms=EDS5H {ECO:0000303|PubMed:26055508}; At2g21340 {ECO:0000312|Araport:AT2G21340}; F3K23.10 {ECO:0000312|EMBL:AAD23682.2}	unnamed protein product, partial [Vitis vinifera]	GO:0009507,GO:0009941,GO:0015238,GO:0015297,GO:0016021,GO:0031969	chloroplast|chloroplast envelope|drug transmembrane transporter activity|antiporter activity|integral component of membrane|chloroplast membrane
chr3	406001	407000	1	1	113	1	97	0	0.88	0.88	0	VIT_203s0038g00430	VIT_203s0038g00430	69.3712	123.291	15.4512	0.125323	-2.99628	0.000453326	0.03943	Down	2.8229	0.322768	LOC100265746	DTX46 {ECO:0000303|PubMed:11739388}; Synonyms=EDS5H {ECO:0000303|PubMed:26055508}; At2g21340 {ECO:0000312|Araport:AT2G21340}; F3K23.10 {ECO:0000312|EMBL:AAD23682.2}	unnamed protein product, partial [Vitis vinifera]	GO:0009507,GO:0009941,GO:0015238,GO:0015297,GO:0016021,GO:0031969	chloroplast|chloroplast envelope|drug transmembrane transporter activity|antiporter activity|integral component of membrane|chloroplast membrane
chr3	1537001	1538000	1	1	98	0	195	1	-0.51	0	0.51	VIT_203s0038g02230	VIT_203s0038g02230	992.091	1396.01	588.177	0.421328	-1.24698	4.917e-05	0.00612087	Down	21.0207	8.2235	LOC100854771	SBT1.6 {ECO:0000303|PubMed:16193095}; Synonyms=SLP2 {ECO:0000303|PubMed:12702015}; At4g34980 {ECO:0000312|Araport:AT4G34980}; M4E13.40 {ECO:0000312|EMBL:CAA17763.1}	PREDICTED: subtilisin-like protease [Vitis vinifera]	GO:0004252,GO:0008236,GO:0009827,GO:0016020	serine-type endopeptidase activity|serine-type peptidase activity|plant-type cell wall modification|membrane
chr3	1659001	1660000	1	1	61	0	91	1	-1.1	0	1.1	VIT_203s0038g02390	VIT_203s0038g02390	167.307	103.875	230.738	2.2213	1.15141	0.0386206	1	Up	7.78063	16.853	LOC100248604	UBC28; Synonyms=UBC9A; At1g64230; F22C12.2	PREDICTED: ubiquitin-conjugating enzyme E2 28 [Vitis vinifera]	GO:0005524,GO:0016567,GO:0016740	ATP binding|protein ubiquitination|transferase activity
chr3	1661001	1662000	1	1	10	0	189	2	-1.06	0	1.06	VIT_203s0038g02390	VIT_203s0038g02390	167.307	103.875	230.738	2.2213	1.15141	0.0386206	1	Up	7.78063	16.853	LOC100248604	UBC28; Synonyms=UBC9A; At1g64230; F22C12.2	PREDICTED: ubiquitin-conjugating enzyme E2 28 [Vitis vinifera]	GO:0005524,GO:0016567,GO:0016740	ATP binding|protein ubiquitination|transferase activity
chr3	1740001	1741000	0.0174	0.141	204	5	252	0	2.45	2.45	0	VIT_203s0038g02490	VIT_203s0038g02490	62.2384	103.875	20.6016	0.198331	-2.33402	0.00641871	0.32016	Down	3.81017	0.716914	LOC100257179	SKP1A; Synonyms=ASK1, SKP1, UIP1; At1g75950; T4O12.17	PREDICTED: SKP1-like protein 1A isoform X4 [Vitis vinifera]	GO:0000226,GO:0005634,GO:0005819,GO:0005829,GO:0005886,GO:0006511,GO:0007059,GO:0007275,GO:0009524,GO:0009734,GO:0009873,GO:0016032,GO:0016567,GO:0045910,GO:0046686	microtubule cytoskeleton organization|nucleus|spindle|cytosol|plasma membrane|ubiquitin-dependent protein catabolic process|chromosome segregation|multicellular organism development|phragmoplast|auxin-activated signaling pathway|ethylene-activated signaling pathway|viral process|protein ubiquitination|negative regulation of DNA recombination|response to cadmium ion	path:vvi04120,path:vvi04141	Ubiquitin mediated proteolysis|Protein processing in endoplasmic reticulum
chr3	1741001	1742000	0.06	0.318	73	0	161	8	-4.97	0	4.97	VIT_203s0038g02490	VIT_203s0038g02490	62.2384	103.875	20.6016	0.198331	-2.33402	0.00641871	0.32016	Down	3.81017	0.716914	LOC100257179	SKP1A; Synonyms=ASK1, SKP1, UIP1; At1g75950; T4O12.17	PREDICTED: SKP1-like protein 1A isoform X4 [Vitis vinifera]	GO:0000226,GO:0005634,GO:0005819,GO:0005829,GO:0005886,GO:0006511,GO:0007059,GO:0007275,GO:0009524,GO:0009734,GO:0009873,GO:0016032,GO:0016567,GO:0045910,GO:0046686	microtubule cytoskeleton organization|nucleus|spindle|cytosol|plasma membrane|ubiquitin-dependent protein catabolic process|chromosome segregation|multicellular organism development|phragmoplast|auxin-activated signaling pathway|ethylene-activated signaling pathway|viral process|protein ubiquitination|negative regulation of DNA recombination|response to cadmium ion	path:vvi04120,path:vvi04141	Ubiquitin mediated proteolysis|Protein processing in endoplasmic reticulum
chr3	1742001	1743000	0.501	0.99	292	0	330	2	-0.61	0	0.61	VIT_203s0038g02490	VIT_203s0038g02490	62.2384	103.875	20.6016	0.198331	-2.33402	0.00641871	0.32016	Down	3.81017	0.716914	LOC100257179	SKP1A; Synonyms=ASK1, SKP1, UIP1; At1g75950; T4O12.17	PREDICTED: SKP1-like protein 1A isoform X4 [Vitis vinifera]	GO:0000226,GO:0005634,GO:0005819,GO:0005829,GO:0005886,GO:0006511,GO:0007059,GO:0007275,GO:0009524,GO:0009734,GO:0009873,GO:0016032,GO:0016567,GO:0045910,GO:0046686	microtubule cytoskeleton organization|nucleus|spindle|cytosol|plasma membrane|ubiquitin-dependent protein catabolic process|chromosome segregation|multicellular organism development|phragmoplast|auxin-activated signaling pathway|ethylene-activated signaling pathway|viral process|protein ubiquitination|negative regulation of DNA recombination|response to cadmium ion	path:vvi04120,path:vvi04141	Ubiquitin mediated proteolysis|Protein processing in endoplasmic reticulum
chr3	2345001	2346000	1	1	10	0	176	5	-2.84	0	2.84	VIT_203s0038g03220	VIT_203s0038g03220	496.651	855.272	138.031	0.161388	-2.63139	2.76253e-11	1.32155e-08	Down	15.0746	2.57405	LOC100257272	LYM2; At2g17120; F6P23.25	hypothetical protein VITISV_025519 [Vitis vinifera]	GO:0005886,GO:0006952,GO:0008061,GO:0009506,GO:0031225,GO:0046658	plasma membrane|defense response|chitin binding|plasmodesma|anchored component of membrane|anchored component of plasma membrane
chr3	2461001	2462000	0.246	0.708	90	0	855	20	-2.34	0	2.34	VIT_203s0038g03400	VIT_203s0038g03400	91.2215	132.999	49.4439	0.371761	-1.42755	0.0449004	1	Down	3.84492	1.3478	LOC100232985	CHIT1B	RecName: Full=Basic endochitinase; Flags: Precursor	GO:0000272,GO:0004568,GO:0006032,GO:0006952,GO:0008061,GO:0016998	polysaccharide catabolic process|chitinase activity|chitin catabolic process|defense response|chitin binding|cell wall macromolecule catabolic process	path:vvi00520,path:vvi04016	Amino sugar and nucleotide sugar metabolism|MAPK signaling pathway - plant
chr3	2463001	2464000	4.84e-06	0.000244	739	23	519	0	3.11	3.11	0	VIT_203s0038g03400	VIT_203s0038g03400	91.2215	132.999	49.4439	0.371761	-1.42755	0.0449004	1	Down	3.84492	1.3478	LOC100232985	CHIT1B	RecName: Full=Basic endochitinase; Flags: Precursor	GO:0000272,GO:0004568,GO:0006032,GO:0006952,GO:0008061,GO:0016998	polysaccharide catabolic process|chitinase activity|chitin catabolic process|defense response|chitin binding|cell wall macromolecule catabolic process	path:vvi00520,path:vvi04016	Amino sugar and nucleotide sugar metabolism|MAPK signaling pathway - plant
chr3	2466001	2467000	0.0697	0.349	632	0	443	3	-0.68	0	0.68	VIT_203s0038g03410	VIT_203s0038g03410	112.242	169.889	54.5943	0.321352	-1.63777	0.0133132	0.537868	Down	4.22207	1.33985	LOC100241839	NAC035 {ECO:0000312|EMBL:AEC05581.1}; At2g02450 {ECO:0000312|Araport:AT2G02450}	PREDICTED: putative NAC domain-containing protein 94 [Vitis vinifera]	GO:0003677,GO:0003700,GO:0005634,GO:0006351,GO:0009908	DNA binding|DNA binding transcription factor activity|nucleus|transcription, DNA-templated|flower development
chr3	2547001	2548000	0.133	0.51	701	1	52	1	-1.78	0.14	1.92	VIT_203s0038g03530	VIT_203s0038g03530	654.554	896.045	413.063	0.460984	-1.11721	0.00109135	0.0824261	Down	14.3283	6.02465	LOC100248706	AATL1; At1g47670; F16N3.4	PREDICTED: lysine histidine transporter-like 8 [Vitis vinifera]	GO:0003333,GO:0005886,GO:0015171,GO:0016021	amino acid transmembrane transport|plasma membrane|amino acid transmembrane transporter activity|integral component of membrane
chr3	4060001	4061000	0.54	1	20	2	10	0	10	10	0	VIT_203s0063g00550	VIT_203s0063g00550	30.6097	60.1894	1.03008	0.017114	-5.86868	0.000155137	0.0164095	Down	3.73377	0.0685199	LOC100253696	CNR1	unnamed protein product, partial [Vitis vinifera]	GO:0008285,GO:0016021	negative regulation of cell proliferation|integral component of membrane
chr3	4062001	4063000	1	1	193	2	63	0	1.04	1.04	0	VIT_203s0063g00550	VIT_203s0063g00550	30.6097	60.1894	1.03008	0.017114	-5.86868	0.000155137	0.0164095	Down	3.73377	0.0685199	LOC100253696	CNR1	unnamed protein product, partial [Vitis vinifera]	GO:0008285,GO:0016021	negative regulation of cell proliferation|integral component of membrane
chr3	4068001	4069000	1	1	44	0	259	2	-0.77	0	0.77	VIT_203s0063g00550	VIT_203s0063g00550	30.6097	60.1894	1.03008	0.017114	-5.86868	0.000155137	0.0164095	Down	3.73377	0.0685199	LOC100253696	CNR1	unnamed protein product, partial [Vitis vinifera]	GO:0008285,GO:0016021	negative regulation of cell proliferation|integral component of membrane
chr3	5262001	5263000	1	1	638	8	71	0	1.25	1.25	0	VIT_203s0063g01970	VIT_203s0063g01970	176.5	258.232	94.7675	0.366986	-1.4462	0.0085592	0.38912	Down	6.00338	2.67029		HB1; Synonyms=GLB1	unnamed protein product, partial [Vitis vinifera]	GO:0019825,GO:0020037,GO:0046872	oxygen binding|heme binding|metal ion binding
chr3	8950001	8951000	0.0221	0.166	114	7	83	0	6.14	6.14	0	VIT_203s0088g00750	VIT_203s0088g00750	20.4164	39.8027	1.03008	0.0258797	-5.27203	0.00251173	0.156883	Down	2.66579	0	LOC100253281		PREDICTED: pathogenesis-related leaf protein 6 [Vitis vinifera]	GO:0005576,GO:0006952,GO:0009607	extracellular region|defense response|response to biotic stimulus	path:vvi04016,path:vvi04075,path:vvi04626	MAPK signaling pathway - plant|Plant hormone signal transduction|Plant-pathogen interaction
chr3	9047001	9048000	0.548	1	60	3	30	0	5	5	0	VIT_203s0088g00810	VIT_203s0088g00810	1177.29	1706.66	647.922	0.379643	-1.39729	2.17974e-06	0.000358448	Down	146.995	53.0879	PR1		PREDICTED: pathogenesis-related protein 1 [Vitis vinifera]	GO:0005576,GO:0006952,GO:0009607	extracellular region|defense response|response to biotic stimulus	path:vvi04016,path:vvi04075,path:vvi04626	MAPK signaling pathway - plant|Plant hormone signal transduction|Plant-pathogen interaction
chr3	17463001	17464000	1	1	120	1	20	0	0.83	0.83	0	VIT_203s0017g01450	VIT_203s0017g01450	91.2549	182.51	0	0	#NAME?	7.88125e-12	4.04616e-09	Down	10.7953	0	LOC100254685		PREDICTED: cysteine-rich and transmembrane domain-containing protein A [Vitis vinifera]
chr3	18463001	18464000	1	1	208	1	82	0	0.48	0.48	0	VIT_203s0017g01990	VIT_203s0017g01990	121.001	220.371	21.6317	0.0981605	-3.34871	2.01107e-06	0.00033596	Down	7.02149	0.681422	LOC104878931	GT3 {ECO:0000312|EMBL:AAU09444.1}	PREDICTED: anthocyanidin 3-O-glucosyltransferase 6-like [Vitis vinifera]	GO:0008152,GO:0016758	metabolic process|transferase activity, transferring hexosyl groups
chr4	400001	401000	0.627	1	31	0	332	15	-4.52	0	4.52	VIT_204s0008g00440	VIT_204s0008g00440	183.04	297.064	69.0155	0.232326	-2.10578	0.000153926	0.0163636	Down	4.06998	0.920036	LOC104878975	RLK5; Synonyms=HAE; At4g28490; F21O9.180	PREDICTED: receptor-like protein kinase HSL1 [Vitis vinifera]
chr4	684001	685000	1	1	251	7	20	0	2.79	2.79	0	VIT_204s0008g00790	VIT_204s0008g00790	318.833	437.829	199.836	0.456424	-1.13155	0.00920028	0.412914	Down	16.4647	7.43962	LOC100245594	RPL28A; At2g19730; F6F22.24	PREDICTED: 60S ribosomal protein L28-1 isoform X2 [Vitis vinifera]	GO:0003735,GO:0005618,GO:0005886,GO:0006412,GO:0009506,GO:0009507,GO:0009735,GO:0022625,GO:0022626	structural constituent of ribosome|cell wall|plasma membrane|translation|plasmodesma|chloroplast|response to cytokinin|cytosolic large ribosomal subunit|cytosolic ribosome	path:vvi03010	Ribosome
chr4	686001	687000	1	1	147	0	310	1	-0.32	0	0.32	VIT_204s0008g00790	VIT_204s0008g00790	318.833	437.829	199.836	0.456424	-1.13155	0.00920028	0.412914	Down	16.4647	7.43962	LOC100245594	RPL28A; At2g19730; F6F22.24	PREDICTED: 60S ribosomal protein L28-1 isoform X2 [Vitis vinifera]	GO:0003735,GO:0005618,GO:0005886,GO:0006412,GO:0009506,GO:0009507,GO:0009735,GO:0022625,GO:0022626	structural constituent of ribosome|cell wall|plasma membrane|translation|plasmodesma|chloroplast|response to cytokinin|cytosolic large ribosomal subunit|cytosolic ribosome	path:vvi03010	Ribosome
chr4	689001	690000	1	1	60	0	341	3	-0.88	0	0.88	VIT_204s0008g00790	VIT_204s0008g00790	318.833	437.829	199.836	0.456424	-1.13155	0.00920028	0.412914	Down	16.4647	7.43962	LOC100245594	RPL28A; At2g19730; F6F22.24	PREDICTED: 60S ribosomal protein L28-1 isoform X2 [Vitis vinifera]	GO:0003735,GO:0005618,GO:0005886,GO:0006412,GO:0009506,GO:0009507,GO:0009735,GO:0022625,GO:0022626	structural constituent of ribosome|cell wall|plasma membrane|translation|plasmodesma|chloroplast|response to cytokinin|cytosolic large ribosomal subunit|cytosolic ribosome	path:vvi03010	Ribosome
chr4	906001	907000	1	1	410	1	140	0	0.24	0.24	0	VIT_204s0008g01070	VIT_204s0008g01070	248.487	397.056	99.9179	0.251647	-1.99053	5.09506e-05	0.00623522	Down	5.7704	1.43036	LOC100250890	IQM4 {ECO:0000303|Ref.5}; At2g26190 {ECO:0000312|Araport:AT2G26190}	PREDICTED: uncharacterized protein LOC100250890 [Vitis vinifera]	GO:0005634,GO:0005737	nucleus|cytoplasm
chr4	908001	909000	1	1	296	1	20	0	0.34	0.34	0	VIT_204s0008g01070	VIT_204s0008g01070	248.487	397.056	99.9179	0.251647	-1.99053	5.09506e-05	0.00623522	Down	5.7704	1.43036	LOC100250890	IQM4 {ECO:0000303|Ref.5}; At2g26190 {ECO:0000312|Araport:AT2G26190}	PREDICTED: uncharacterized protein LOC100250890 [Vitis vinifera]	GO:0005634,GO:0005737	nucleus|cytoplasm
chr4	942001	943000	0.166	0.575	271	2	394	0	0.74	0.74	0	VIT_204s0008g01140	VIT_204s0008g01140	8.73717	17.4743	0	0	#NAME?	0.0274209	0.885778	Down	0.312547	0	LOC100262911	CWINV1; Synonyms=BFRUCT1; At3g13790; MMM17.26	PREDICTED: beta-fructofuranosidase, insoluble isoenzyme CWINV1 isoform X3 [Vitis vinifera]	GO:0004564,GO:0004575,GO:0005618,GO:0005886,GO:0005975,GO:0009611,GO:0048046,GO:0050832,GO:0080167	beta-fructofuranosidase activity|sucrose alpha-glucosidase activity|cell wall|plasma membrane|carbohydrate metabolic process|response to wounding|apoplast|defense response to fungus|response to karrikin
chr4	1211001	1212000	1	1	56	1	30	0	1.79	1.79	0	VIT_204s0008g01470	VIT_204s0008g01470	469.221	792.17	146.272	0.184647	-2.43716	9.76689e-10	3.26323e-07	Down	15.2939	2.61744	LOC100266400	WRKY50; At5g26170; T19G15.20	PREDICTED: probable WRKY transcription factor 50 [Vitis vinifera]	GO:0003700,GO:0005634,GO:0006351,GO:0009867,GO:0043565,GO:0050832	DNA binding transcription factor activity|nucleus|transcription, DNA-templated|jasmonic acid mediated signaling pathway|sequence-specific DNA binding|defense response to fungus
chr4	1474001	1475000	1	1	800	2	41	0	0.25	0.25	0	VIT_204s0008g01850	VIT_204s0008g01850	145.586	241.728	49.4439	0.204543	-2.28952	0.000194889	0.0198175	Down	2.03308	0.39378	LOC100256096	GT-2; At1g76890; F7O12.6	PREDICTED: trihelix transcription factor GTL1-like [Vitis vinifera]	GO:0003677,GO:0003700,GO:0005634,GO:0006351	DNA binding|DNA binding transcription factor activity|nucleus|transcription, DNA-templated
chr4	1477001	1478000	0.164	0.572	10	1	51	0	10	10	0	VIT_204s0008g01850	VIT_204s0008g01850	145.586	241.728	49.4439	0.204543	-2.28952	0.000194889	0.0198175	Down	2.03308	0.39378	LOC100256096	GT-2; At1g76890; F7O12.6	PREDICTED: trihelix transcription factor GTL1-like [Vitis vinifera]	GO:0003677,GO:0003700,GO:0005634,GO:0006351	DNA binding|DNA binding transcription factor activity|nucleus|transcription, DNA-templated
chr4	1477001	1478000	0.164	0.572	10	1	51	0	10	10	0	VIT_204s0008g01860	VIT_204s0008g01860	92.6592	153.386	31.9325	0.208184	-2.26407	0.00198346	0.133386	Down	3.42153	0.696718	LOC100254391		PREDICTED: cytochrome P450 CYP72A219 [Vitis vinifera]	GO:0004497,GO:0005506,GO:0016021,GO:0016705,GO:0020037	monooxygenase activity|iron ion binding|integral component of membrane|oxidoreductase activity, acting on paired donors, with incorporation or reduction of molecular oxygen|heme binding
chr4	1480001	1481000	1	1	41	1	40	0	2.44	2.44	0	VIT_204s0008g01860	VIT_204s0008g01860	92.6592	153.386	31.9325	0.208184	-2.26407	0.00198346	0.133386	Down	3.42153	0.696718	LOC100254391		PREDICTED: cytochrome P450 CYP72A219 [Vitis vinifera]	GO:0004497,GO:0005506,GO:0016021,GO:0016705,GO:0020037	monooxygenase activity|iron ion binding|integral component of membrane|oxidoreductase activity, acting on paired donors, with incorporation or reduction of molecular oxygen|heme binding
chr4	1689001	1690000	0.0172	0.14	50	3	334	2	5.4	6	0.6	VIT_204s0008g02070	VIT_204s0008g02070	51.4707	85.4301	17.5114	0.204979	-2.28645	0.0129302	0.525422	Down	1.40837	0.31225	LOC100262822	RIPK {ECO:0000303|PubMed:21320696}; Synonyms=PBL14 {ECO:0000303|PubMed:20413097}, PIX8 {ECO:0000303|PubMed:23951354}; At2g05940 {ECO:0000312|Araport:AT2G05940}	PREDICTED: serine/threonine-protein kinase At5g01020 [Vitis vinifera]
chr4	2404001	2405000	1	1	130	0	189	1	-0.53	0	0.53	VIT_204s0008g02920	VIT_204s0008g02920	322.679	210.663	434.695	2.06346	1.04507	0.0154009	0.600321	Up	2.83591	5.60153	LOC100250706	PUB34; At2g19410; F27F23.21	hypothetical protein VITISV_023046 [Vitis vinifera]
chr4	2890001	2891000	0.062	0.324	491	5	477	0	1.02	1.02	0	VIT_204s0008g03530	VIT_204s0008g03530	91.6699	168.919	14.4211	0.0853733	-3.55007	8.43416e-06	0.00130537	Down	2.38556	0.213978	LOC100244024	NPR4 {ECO:0000303|PubMed:17309686}; Os01g0837000 {ECO:0000312|EMBL:BAS75114.1}, LOC_Os01g61990 {ECO:0000305}; P0506B12.37 {ECO:0000312|EMBL:BAD73402.1}	PREDICTED: ankyrin repeat-containing protein At5g02620-like [Vitis vinifera]	GO:0005886,GO:0016021	plasma membrane|integral component of membrane
chr4	4580001	4581000	1.6e-08	1.69e-06	379	54	171	1	13.66	14.25	0.58	VIT_204s0008g05100	VIT_204s0008g05100	71.4202	106.788	36.0529	0.337613	-1.56656	0.0460509	1	Down	3.70968	1.06103	LOC100244002	COX5B-2; At1g80230; F18B13.29	unnamed protein product, partial [Vitis vinifera]	GO:0004129,GO:0005739,GO:0005751,GO:0006123,GO:0042776,GO:0046872	cytochrome-c oxidase activity|mitochondrion|mitochondrial respiratory chain complex IV|mitochondrial electron transport, cytochrome c to oxygen|mitochondrial ATP synthesis coupled proton transport|metal ion binding	path:vvi00190	Oxidative phosphorylation
chr4	4581001	4582000	0.228	0.681	80	2	87	0	2.5	2.5	0	VIT_204s0008g05100	VIT_204s0008g05100	71.4202	106.788	36.0529	0.337613	-1.56656	0.0460509	1	Down	3.70968	1.06103	LOC100244002	COX5B-2; At1g80230; F18B13.29	unnamed protein product, partial [Vitis vinifera]	GO:0004129,GO:0005739,GO:0005751,GO:0006123,GO:0042776,GO:0046872	cytochrome-c oxidase activity|mitochondrion|mitochondrial respiratory chain complex IV|mitochondrial electron transport, cytochrome c to oxygen|mitochondrial ATP synthesis coupled proton transport|metal ion binding	path:vvi00190	Oxidative phosphorylation
chr4	4583001	4584000	0.309	0.792	290	0	590	4	-0.68	0	0.68	VIT_204s0008g05100	VIT_204s0008g05100	71.4202	106.788	36.0529	0.337613	-1.56656	0.0460509	1	Down	3.70968	1.06103	LOC100244002	COX5B-2; At1g80230; F18B13.29	unnamed protein product, partial [Vitis vinifera]	GO:0004129,GO:0005739,GO:0005751,GO:0006123,GO:0042776,GO:0046872	cytochrome-c oxidase activity|mitochondrion|mitochondrial respiratory chain complex IV|mitochondrial electron transport, cytochrome c to oxygen|mitochondrial ATP synthesis coupled proton transport|metal ion binding	path:vvi00190	Oxidative phosphorylation
chr4	5265001	5266000	1	1	161	2	30	0	1.24	1.24	0	VIT_204s0008g05760	VIT_204s0008g05760	823.691	1378.53	268.851	0.195027	-2.35825	2.09394e-12	1.15988e-09	Down	19.1113	3.36758	LOC100264507	WRKY40; At1g80840; F23A5.19	unnamed protein product, partial [Vitis vinifera]	GO:0002237,GO:0003700,GO:0005634,GO:0006351,GO:0009611,GO:0009751,GO:0010200,GO:0031347,GO:0042742,GO:0043565,GO:0044212,GO:0045892,GO:0050832	response to molecule of bacterial origin|DNA binding transcription factor activity|nucleus|transcription, DNA-templated|response to wounding|response to salicylic acid|response to chitin|regulation of defense response|defense response to bacterium|sequence-specific DNA binding|transcription regulatory region DNA binding|negative regulation of transcription, DNA-templated|defense response to fungus
chr4	5665001	5666000	1	1	10	0	219	9	-4.11	0	4.11	VIT_204s0008g05970	VIT_204s0008g05970	70.757	111.642	29.8724	0.267574	-1.90199	0.0171723	0.64894	Down	2.60934	0.730731	LOC100262872		PREDICTED: uncharacterized protein LOC100262872 [Vitis vinifera]
chr4	7264001	7265000	0.194	0.627	306	0	786	6	-0.76	0	0.76	VIT_204s0008g07130	VIT_204s0008g07130	11.6496	23.2991	0	0	#NAME?	0.00968566	0.426946	Down	0.434701	0	LOC100252630	At5g10770 {ECO:0000312|Araport:AT5G10770}; T30N20_40 {ECO:0000312|EMBL:CAB96832.1}	PREDICTED: aspartic proteinase CDR1-like [Vitis vinifera]	GO:0004190,GO:0005886,GO:0006508,GO:0030163,GO:0031225	aspartic-type endopeptidase activity|plasma membrane|proteolysis|protein catabolic process|anchored component of membrane
chr4	7315001	7316000	1	1	601	3	131	0	0.5	0.5	0	VIT_204s0008g07150	VIT_204s0008g07150	170.234	311.626	28.8423	0.0925543	-3.43356	2.83144e-08	7.35789e-06	Down	12.0048	0.961476	LOC100255364	At5g10770 {ECO:0000312|Araport:AT5G10770}; T30N20_40 {ECO:0000312|EMBL:CAB96832.1}	PREDICTED: protein ASPARTIC PROTEASE IN GUARD CELL 2 [Vitis vinifera]	GO:0004190,GO:0005886,GO:0006508,GO:0030163,GO:0031225	aspartic-type endopeptidase activity|plasma membrane|proteolysis|protein catabolic process|anchored component of membrane
chr4	7319001	7320000	1	1	10	0	130	3	-2.31	0	2.31	VIT_204s0008g07150	VIT_204s0008g07150	170.234	311.626	28.8423	0.0925543	-3.43356	2.83144e-08	7.35789e-06	Down	12.0048	0.961476	LOC100255364	At5g10770 {ECO:0000312|Araport:AT5G10770}; T30N20_40 {ECO:0000312|EMBL:CAB96832.1}	PREDICTED: protein ASPARTIC PROTEASE IN GUARD CELL 2 [Vitis vinifera]	GO:0004190,GO:0005886,GO:0006508,GO:0030163,GO:0031225	aspartic-type endopeptidase activity|plasma membrane|proteolysis|protein catabolic process|anchored component of membrane
chr4	7499001	7500000	0.404	0.894	290	1	427	0	0.34	0.34	0	VIT_204s0008g07250	VIT_204s0008g07250	108.529	190.276	26.7821	0.140754	-2.82875	6.92742e-05	0.00823815	Down	7.06294	0.59598	LOC100265510	At5g10770 {ECO:0000312|Araport:AT5G10770}; T30N20_40 {ECO:0000312|EMBL:CAB96832.1}	PREDICTED: protein ASPARTIC PROTEASE IN GUARD CELL 2-like isoform X1 [Vitis vinifera]	GO:0004190,GO:0005886,GO:0006508,GO:0030163,GO:0031225	aspartic-type endopeptidase activity|plasma membrane|proteolysis|protein catabolic process|anchored component of membrane
chr4	9459001	9460000	1	1	10	0	356	2	-0.56	0	0.56	VIT_204s0069g01010	VIT_204s0069g01010	412.933	797.024	28.8423	0.0361875	-4.78837	6.66896e-23	1.16979e-19	Down	28.371	0.96827	LOC100244374		PREDICTED: protein YLS9 [Vitis vinifera]	GO:0005829,GO:0005886,GO:0006970,GO:0009737,GO:0009738,GO:0010116,GO:0016021,GO:1902074	cytosol|plasma membrane|response to osmotic stress|response to abscisic acid|abscisic acid-activated signaling pathway|positive regulation of abscisic acid biosynthetic process|integral component of membrane|response to salt
chr4	16629001	16630000	0.00957	0.093	105	5	20	5	-20.24	4.76	25	VIT_204s0023g00430	VIT_204s0023g00430	44.1601	71.8389	16.4813	0.22942	-2.12394	0.0283875	0.905346	Down	2.35373	0.20539	LOC100247948	At1g05000; T7A14.14	PREDICTED: probable tyrosine-protein phosphatase At1g05000 [Vitis vinifera]	GO:0004725,GO:0005737,GO:0016791	protein tyrosine phosphatase activity|cytoplasm|phosphatase activity
chr4	16765001	16766000	1	1	20	0	386	3	-0.78	0	0.78	VIT_204s0023g00530	VIT_204s0023g00530	10.3008	0	20.6016	Inf	Inf	0.0140087	0.556358	Up	0	2.73692	LOC100252964	SAUR23 {ECO:0000303|PubMed:12036261}; At5g18060 {ECO:0000312|Araport:AT5G18060}; MCM23.16 {ECO:0000312|EMBL:BAB08405.1}	hypothetical protein VITISV_035059 [Vitis vinifera]	GO:0005886,GO:0007275,GO:0009734,GO:0040008	plasma membrane|multicellular organism development|auxin-activated signaling pathway|regulation of growth	path:vvi04075	Plant hormone signal transduction
chr4	16766001	16767000	0.183	0.607	286	2	762	1	0.57	0.7	0.13	VIT_204s0023g00530	VIT_204s0023g00530	10.3008	0	20.6016	Inf	Inf	0.0140087	0.556358	Up	0	2.73692	LOC100252964	SAUR23 {ECO:0000303|PubMed:12036261}; At5g18060 {ECO:0000312|Araport:AT5G18060}; MCM23.16 {ECO:0000312|EMBL:BAB08405.1}	hypothetical protein VITISV_035059 [Vitis vinifera]	GO:0005886,GO:0007275,GO:0009734,GO:0040008	plasma membrane|multicellular organism development|auxin-activated signaling pathway|regulation of growth	path:vvi04075	Plant hormone signal transduction
chr4	17238001	17239000	0.589	1	188	0	735	5	-0.68	0	0.68	VIT_204s0023g00830	VIT_204s0023g00830	1277.91	1886.26	669.553	0.354964	-1.49426	2.72394e-07	5.73361e-05	Down	26.4412	8.30612	LOC100265011	CRT3; At1g08450; T27G7.13	unnamed protein product, partial [Vitis vinifera]	GO:0005509,GO:0005783,GO:0005788,GO:0005789,GO:0006457,GO:0009626,GO:0010204,GO:0030246,GO:0042742,GO:0046283,GO:0051082	calcium ion binding|endoplasmic reticulum|endoplasmic reticulum lumen|endoplasmic reticulum membrane|protein folding|plant-type hypersensitive response|defense response signaling pathway, resistance gene-independent|carbohydrate binding|defense response to bacterium|anthocyanin-containing compound metabolic process|unfolded protein binding	path:vvi04141,path:vvi04145	Protein processing in endoplasmic reticulum|Phagosome
chr4	17243001	17244000	0.101	0.436	40	1	355	0	2.5	2.5	0	VIT_204s0023g00830	VIT_204s0023g00830	1277.91	1886.26	669.553	0.354964	-1.49426	2.72394e-07	5.73361e-05	Down	26.4412	8.30612	LOC100265011	CRT3; At1g08450; T27G7.13	unnamed protein product, partial [Vitis vinifera]	GO:0005509,GO:0005783,GO:0005788,GO:0005789,GO:0006457,GO:0009626,GO:0010204,GO:0030246,GO:0042742,GO:0046283,GO:0051082	calcium ion binding|endoplasmic reticulum|endoplasmic reticulum lumen|endoplasmic reticulum membrane|protein folding|plant-type hypersensitive response|defense response signaling pathway, resistance gene-independent|carbohydrate binding|defense response to bacterium|anthocyanin-containing compound metabolic process|unfolded protein binding	path:vvi04141,path:vvi04145	Protein processing in endoplasmic reticulum|Phagosome
chr4	18296001	18297000	1	1	170	0	223	1	-0.45	0	0.45	VIT_204s0023g01720	VIT_204s0023g01720	93.441	144.649	42.2334	0.291972	-1.7761	0.0128356	0.522587	Down	1.66681	0.538351	LOC100244435	SPCC23B6.04c	PREDICTED: random slug protein 5 isoform X3 [Vitis vinifera]	GO:0005628,GO:0005886,GO:0008526,GO:0045332	prospore membrane|plasma membrane|phosphatidylinositol transporter activity|phospholipid translocation
chr4	18299001	18300000	0.562	1	30	0	81	3	-3.7	0	3.7	VIT_204s0023g01720	VIT_204s0023g01720	93.441	144.649	42.2334	0.291972	-1.7761	0.0128356	0.522587	Down	1.66681	0.538351	LOC100244435	SPCC23B6.04c	PREDICTED: random slug protein 5 isoform X3 [Vitis vinifera]	GO:0005628,GO:0005886,GO:0008526,GO:0045332	prospore membrane|plasma membrane|phosphatidylinositol transporter activity|phospholipid translocation
chr4	20913001	20914000	1	1	267	1	94	0	0.37	0.37	0	VIT_204s0044g00220	VIT_204s0044g00220	333.902	635.872	31.9325	0.0502185	-4.31564	1.61234e-17	1.69691e-14	Down	11.4856	0.666886	LOC100257537		PREDICTED: zeaxanthin epoxidase, chloroplastic isoform X1 [Vitis vinifera]	GO:0002239,GO:0004497,GO:0044550,GO:0071949	response to oomycetes|monooxygenase activity|secondary metabolite biosynthetic process|FAD binding
chr4	20914001	20915000	0.323	0.81	126	5	52	0	3.97	3.97	0	VIT_204s0044g00220	VIT_204s0044g00220	333.902	635.872	31.9325	0.0502185	-4.31564	1.61234e-17	1.69691e-14	Down	11.4856	0.666886	LOC100257537		PREDICTED: zeaxanthin epoxidase, chloroplastic isoform X1 [Vitis vinifera]	GO:0002239,GO:0004497,GO:0044550,GO:0071949	response to oomycetes|monooxygenase activity|secondary metabolite biosynthetic process|FAD binding
chr4	20938001	20939000	1	1	40	0	350	2	-0.57	0	0.57	VIT_204s0044g00250	VIT_204s0044g00250	95.5827	175.714	15.4512	0.0879339	-3.50744	7.24593e-06	0.00112978	Down	3.38111	0.341266	LOC100255091	CAS1	hypothetical protein VITISV_028023 [Vitis vinifera]	GO:0004124,GO:0005739,GO:0006535,GO:0009611,GO:0009836,GO:0016740,GO:0019499,GO:0050017	cysteine synthase activity|mitochondrion|cysteine biosynthetic process from serine|response to wounding|fruit ripening, climacteric|transferase activity|cyanide metabolic process|L-3-cyanoalanine synthase activity	path:vvi00270,path:vvi00460,path:vvi00920	Cysteine and methionine metabolism|Cyanoamino acid metabolism|Sulfur metabolism
chr4	21608001	21609000	0.3	0.784	291	3	170	0	1.03	1.03	0	VIT_204s0044g00660	VIT_204s0044g00660	20.0495	34.9487	5.15041	0.147371	-2.76248	0.0472828	1	Down	0.600287	0.102931	LOC100264417	LECRK4 {ECO:0000303|PubMed:25485617}; Os04g0202800 {ECO:0000312|EMBL:BAF14142.2}, LOC_Os04g12600 {ECO:0000305}; OsJ_13808 {ECO:0000312|EMBL:EAZ29749.1}, OSJNBb0005B05.8 {ECO:0000312|EMBL:CAE03341.2}	PREDICTED: G-type lectin S-receptor-like serine/threonine-protein kinase RLK1 [Vitis vinifera]	GO:0004674,GO:0005524,GO:0005886,GO:0006468,GO:0016021,GO:0030246	protein serine/threonine kinase activity|ATP binding|plasma membrane|protein phosphorylation|integral component of membrane|carbohydrate binding
chr4	21610001	21611000	1	1	10	0	728	4	-0.55	0	0.55	VIT_204s0044g00660	VIT_204s0044g00660	20.0495	34.9487	5.15041	0.147371	-2.76248	0.0472828	1	Down	0.600287	0.102931	LOC100264417	LECRK4 {ECO:0000303|PubMed:25485617}; Os04g0202800 {ECO:0000312|EMBL:BAF14142.2}, LOC_Os04g12600 {ECO:0000305}; OsJ_13808 {ECO:0000312|EMBL:EAZ29749.1}, OSJNBb0005B05.8 {ECO:0000312|EMBL:CAE03341.2}	PREDICTED: G-type lectin S-receptor-like serine/threonine-protein kinase RLK1 [Vitis vinifera]	GO:0004674,GO:0005524,GO:0005886,GO:0006468,GO:0016021,GO:0030246	protein serine/threonine kinase activity|ATP binding|plasma membrane|protein phosphorylation|integral component of membrane|carbohydrate binding
chr4	21844001	21845000	1	1	812	5	53	0	0.62	0.62	0	VIT_204s0044g00730	VIT_204s0044g00730	93.5892	139.795	47.3838	0.338953	-1.56084	0.0274371	0.885778	Down	2.56164	0.834527	LOC100262539	LECRK3 {ECO:0000303|PubMed:25485617}; H0512B01.11 {ECO:0000312|EMBL:CAH67716.1}, OsI_14844 {ECO:0000312|EMBL:EAY93045.1}, OSIGBa0147O06.1 {ECO:0000312|EMBL:CAH66271.1}	PREDICTED: G-type lectin S-receptor-like serine/threonine-protein kinase RLK1 isoform X1 [Vitis vinifera]	GO:0004674,GO:0005524,GO:0006952,GO:0016021,GO:0030246	protein serine/threonine kinase activity|ATP binding|defense response|integral component of membrane|carbohydrate binding
chr4	21845001	21846000	0.354	0.842	292	0	160	1	-0.62	0	0.62	VIT_204s0044g00730	VIT_204s0044g00730	93.5892	139.795	47.3838	0.338953	-1.56084	0.0274371	0.885778	Down	2.56164	0.834527	LOC100262539	LECRK3 {ECO:0000303|PubMed:25485617}; H0512B01.11 {ECO:0000312|EMBL:CAH67716.1}, OsI_14844 {ECO:0000312|EMBL:EAY93045.1}, OSIGBa0147O06.1 {ECO:0000312|EMBL:CAH66271.1}	PREDICTED: G-type lectin S-receptor-like serine/threonine-protein kinase RLK1 isoform X1 [Vitis vinifera]	GO:0004674,GO:0005524,GO:0006952,GO:0016021,GO:0030246	protein serine/threonine kinase activity|ATP binding|defense response|integral component of membrane|carbohydrate binding
chr4	21847001	21848000	1	1	201	0	478	2	-0.42	0	0.42	VIT_204s0044g00730	VIT_204s0044g00730	93.5892	139.795	47.3838	0.338953	-1.56084	0.0274371	0.885778	Down	2.56164	0.834527	LOC100262539	LECRK3 {ECO:0000303|PubMed:25485617}; H0512B01.11 {ECO:0000312|EMBL:CAH67716.1}, OsI_14844 {ECO:0000312|EMBL:EAY93045.1}, OSIGBa0147O06.1 {ECO:0000312|EMBL:CAH66271.1}	PREDICTED: G-type lectin S-receptor-like serine/threonine-protein kinase RLK1 isoform X1 [Vitis vinifera]	GO:0004674,GO:0005524,GO:0006952,GO:0016021,GO:0030246	protein serine/threonine kinase activity|ATP binding|defense response|integral component of membrane|carbohydrate binding
chr4	21849001	21850000	0.103	0.44	30	1	538	1	3.15	3.33	0.19	VIT_204s0044g00730	VIT_204s0044g00730	93.5892	139.795	47.3838	0.338953	-1.56084	0.0274371	0.885778	Down	2.56164	0.834527	LOC100262539	LECRK3 {ECO:0000303|PubMed:25485617}; H0512B01.11 {ECO:0000312|EMBL:CAH67716.1}, OsI_14844 {ECO:0000312|EMBL:EAY93045.1}, OSIGBa0147O06.1 {ECO:0000312|EMBL:CAH66271.1}	PREDICTED: G-type lectin S-receptor-like serine/threonine-protein kinase RLK1 isoform X1 [Vitis vinifera]	GO:0004674,GO:0005524,GO:0006952,GO:0016021,GO:0030246	protein serine/threonine kinase activity|ATP binding|defense response|integral component of membrane|carbohydrate binding
chr4	21864001	21865000	1	1	542	1	20	0	0.18	0.18	0	VIT_204s0044g00750	VIT_204s0044g00750	71.4314	123.291	19.5716	0.158743	-2.65524	0.00131977	0.0964575	Down	3.29253	0.530593	LOC100267699	LECRK3 {ECO:0000303|PubMed:25485617}; H0512B01.11 {ECO:0000312|EMBL:CAH67716.1}, OsI_14844 {ECO:0000312|EMBL:EAY93045.1}, OSIGBa0147O06.1 {ECO:0000312|EMBL:CAH66271.1}	PREDICTED: G-type lectin S-receptor-like serine/threonine-protein kinase RLK1 isoform X1 [Vitis vinifera]	GO:0004674,GO:0005524,GO:0006952,GO:0016021,GO:0030246	protein serine/threonine kinase activity|ATP binding|defense response|integral component of membrane|carbohydrate binding
chr4	21866001	21867000	0.301	0.784	363	3	212	0	0.83	0.83	0	VIT_204s0044g00750	VIT_204s0044g00750	71.4314	123.291	19.5716	0.158743	-2.65524	0.00131977	0.0964575	Down	3.29253	0.530593	LOC100267699	LECRK3 {ECO:0000303|PubMed:25485617}; H0512B01.11 {ECO:0000312|EMBL:CAH67716.1}, OsI_14844 {ECO:0000312|EMBL:EAY93045.1}, OSIGBa0147O06.1 {ECO:0000312|EMBL:CAH66271.1}	PREDICTED: G-type lectin S-receptor-like serine/threonine-protein kinase RLK1 isoform X1 [Vitis vinifera]	GO:0004674,GO:0005524,GO:0006952,GO:0016021,GO:0030246	protein serine/threonine kinase activity|ATP binding|defense response|integral component of membrane|carbohydrate binding
chr4	22947001	22948000	1	1	440	2	95	0	0.45	0.45	0	VIT_204s0044g01420	VIT_204s0044g01420	12.65	24.2699	1.03008	0.0424427	-4.55834	0.0243253	0.829767	Down	0.531876	0.025091	LOC100252291	GSVIVT00026920001, LOC100243180	unnamed protein product, partial [Vitis vinifera]	GO:0004650,GO:0005975,GO:0016021	polygalacturonase activity|carbohydrate metabolic process|integral component of membrane
chr4	22948001	22949000	1	1	735	5	111	0	0.68	0.68	0	VIT_204s0044g01420	VIT_204s0044g01420	12.65	24.2699	1.03008	0.0424427	-4.55834	0.0243253	0.829767	Down	0.531876	0.025091	LOC100252291	GSVIVT00026920001, LOC100243180	unnamed protein product, partial [Vitis vinifera]	GO:0004650,GO:0005975,GO:0016021	polygalacturonase activity|carbohydrate metabolic process|integral component of membrane
chr4	22949001	22950000	1	1	105	0	275	2	-0.73	0	0.73	VIT_204s0044g01420	VIT_204s0044g01420	12.65	24.2699	1.03008	0.0424427	-4.55834	0.0243253	0.829767	Down	0.531876	0.025091	LOC100252291	GSVIVT00026920001, LOC100243180	unnamed protein product, partial [Vitis vinifera]	GO:0004650,GO:0005975,GO:0016021	polygalacturonase activity|carbohydrate metabolic process|integral component of membrane
chr4	22951001	22952000	0.0296	0.201	20	0	10	3	-30	0	30	VIT_204s0044g01420	VIT_204s0044g01420	12.65	24.2699	1.03008	0.0424427	-4.55834	0.0243253	0.829767	Down	0.531876	0.025091	LOC100252291	GSVIVT00026920001, LOC100243180	unnamed protein product, partial [Vitis vinifera]	GO:0004650,GO:0005975,GO:0016021	polygalacturonase activity|carbohydrate metabolic process|integral component of membrane
chr4	22952001	22953000	1.29e-16	4.77e-14	87	29	239	2	32.5	33.33	0.84	VIT_204s0044g01420	VIT_204s0044g01420	12.65	24.2699	1.03008	0.0424427	-4.55834	0.0243253	0.829767	Down	0.531876	0.025091	LOC100252291	GSVIVT00026920001, LOC100243180	unnamed protein product, partial [Vitis vinifera]	GO:0004650,GO:0005975,GO:0016021	polygalacturonase activity|carbohydrate metabolic process|integral component of membrane
chr5	894001	895000	9.17e-06	0.00042	40	11	239	9	23.73	27.5	3.77	VIT_205s0077g01150	VIT_205s0077g01150	322.945	471.807	174.084	0.368972	-1.43841	0.000972496	0.0755353	Down	14.6477	5.01531	LOC100232986	HGN1	beta-1,3-glucanase [Vitis vinifera]	GO:0005773,GO:0005975,GO:0006952,GO:0042973	vacuole|carbohydrate metabolic process|defense response|glucan endo-1,3-beta-D-glucosidase activity
chr5	1015001	1016000	0.416	0.906	80	0	57	1	-1.75	0	1.75	VIT_205s0077g01250	VIT_205s0077g01250	106.399	40.7735	172.024	4.21901	2.0769	0.00247585	0.155565	Up	0.951647	3.97859	LOC100261982	CTL2; At3g16920; K14A17.4	PREDICTED: chitinase-like protein 2 [Vitis vinifera]	GO:0005576,GO:0005975,GO:0006032,GO:0016998	extracellular region|carbohydrate metabolic process|chitin catabolic process|cell wall macromolecule catabolic process
chr5	1016001	1017000	1	1	30	0	171	2	-1.17	0	1.17	VIT_205s0077g01250	VIT_205s0077g01250	106.399	40.7735	172.024	4.21901	2.0769	0.00247585	0.155565	Up	0.951647	3.97859	LOC100261982	CTL2; At3g16920; K14A17.4	PREDICTED: chitinase-like protein 2 [Vitis vinifera]	GO:0005576,GO:0005975,GO:0006032,GO:0016998	extracellular region|carbohydrate metabolic process|chitin catabolic process|cell wall macromolecule catabolic process
chr5	1173001	1174000	1	1	10	0	40	1	-2.5	0	2.5	VIT_205s0077g01460	VIT_205s0077g01460	77.5563	40.7735	114.339	2.80425	1.48762	0.0495108	1	Up	1.1193	3.36359	LOC100248329		unnamed protein product, partial [Vitis vinifera]
chr5	1232001	1233000	1	1	20	0	443	2	-0.45	0	0.45	VIT_205s0077g01530	VIT_205s0077g01530	196.972	380.552	13.3911	0.0351885	-4.82875	1.01976e-13	7.40167e-11	Down	18.0033	0.65398	LOC100246525	PRUA1	PREDICTED: major allergen Pru av 1 [Vitis vinifera]	GO:0006952,GO:0009607	defense response|response to biotic stimulus
chr5	1234001	1235000	0.0617	0.324	217	1	125	4	-2.74	0.46	3.2	VIT_205s0077g01530	VIT_205s0077g01530	196.972	380.552	13.3911	0.0351885	-4.82875	1.01976e-13	7.40167e-11	Down	18.0033	0.65398	LOC100246525	PRUA1	PREDICTED: major allergen Pru av 1 [Vitis vinifera]	GO:0006952,GO:0009607	defense response|response to biotic stimulus
chr5	1239001	1240000	0.179	0.601	585	4	726	1	0.55	0.68	0.14	VIT_205s0077g01540	VIT_205s0077g01540	721.728	1310.58	132.881	0.101391	-3.302	1.83787e-19	2.27561e-16	Down	59.2207	5.87261	LOC100251668	PRUA1	PREDICTED: major allergen Pru av 1-like [Vitis vinifera]	GO:0006952,GO:0009607	defense response|response to biotic stimulus
chr5	1240001	1241000	2.38e-10	3.77e-08	101	17	307	1	16.51	16.83	0.33	VIT_205s0077g01540	VIT_205s0077g01540	721.728	1310.58	132.881	0.101391	-3.302	1.83787e-19	2.27561e-16	Down	59.2207	5.87261	LOC100251668	PRUA1	PREDICTED: major allergen Pru av 1-like [Vitis vinifera]	GO:0006952,GO:0009607	defense response|response to biotic stimulus
chr5	1250001	1251000	1	1	91	0	194	2	-1.03	0	1.03	VIT_205s0077g01570	VIT_205s0077g01570	4676.95	8168.28	1185.62	0.14515	-2.78439	3.31221e-27	1.16198e-23	Down	141.712	19.4364	LOC100244758	PRUA1	PREDICTED: uncharacterized protein LOC8278794 [Ricinus communis]	GO:0006952,GO:0009607	defense response|response to biotic stimulus
chr5	1262001	1263000	0.303	0.786	203	1	40	1	-2.01	0.49	2.5	VIT_205s0077g01570	VIT_205s0077g01570	4676.95	8168.28	1185.62	0.14515	-2.78439	3.31221e-27	1.16198e-23	Down	141.712	19.4364	LOC100244758	PRUA1	PREDICTED: uncharacterized protein LOC8278794 [Ricinus communis]	GO:0006952,GO:0009607	defense response|response to biotic stimulus
chr5	1262001	1263000	0.303	0.786	203	1	40	1	-2.01	0.49	2.5	VIT_205s0077g01580	VIT_205s0077g01580	8730.38	13243.6	4217.16	0.31843	-1.65095	1.11422e-11	5.5841e-09	Down	783.221	234.29	PR10.2	PRUA1	PREDICTED: major allergen Pru av 1 [Vitis vinifera]	GO:0006952,GO:0009607	defense response|response to biotic stimulus
chr5	1264001	1265000	1	1	391	1	100	0	0.26	0.26	0	VIT_205s0077g01580	VIT_205s0077g01580	8730.38	13243.6	4217.16	0.31843	-1.65095	1.11422e-11	5.5841e-09	Down	783.221	234.29	PR10.2	PRUA1	PREDICTED: major allergen Pru av 1 [Vitis vinifera]	GO:0006952,GO:0009607	defense response|response to biotic stimulus
chr5	1306001	1307000	0.063	0.328	295	0	196	3	-1.53	0	1.53	VIT_205s0077g01690	VIT_205s0077g01690	57.277	114.554	0	0	#NAME?	2.47165e-08	6.50323e-06	Down	5.86294	0	PR10.8	STH-2	PREDICTED: pathogenesis-related protein STH-2 [Vitis vinifera]	GO:0006952,GO:0009607	defense response|response to biotic stimulus
chr5	1873001	1874000	0.388	0.874	152	1	240	0	0.66	0.66	0	VIT_205s0077g02350	VIT_205s0077g02350	242.67	351.428	133.911	0.381047	-1.39196	0.00409948	0.228554	Down	32.3969	11.3206	LOC100253295		PREDICTED: uncharacterized protein LOC100253295 [Vitis vinifera]
chr5	1875001	1876000	1	1	91	1	51	0	1.1	1.1	0	VIT_205s0077g02350	VIT_205s0077g02350	242.67	351.428	133.911	0.381047	-1.39196	0.00409948	0.228554	Down	32.3969	11.3206	LOC100253295		PREDICTED: uncharacterized protein LOC100253295 [Vitis vinifera]
chr5	2845001	2846000	0.00147	0.0238	523	12	542	1	2.11	2.29	0.18	VIT_205s0020g01070	VIT_205s0020g01070	10.8159	0	21.6317	Inf	Inf	0.0116207	0.479615	Up	0	0.284624	LOC100244346	IAA31; At3g17600; MKP6.16	hypothetical protein VITISV_026538 [Vitis vinifera]	GO:0003700,GO:0005634,GO:0006351,GO:0009630,GO:0009733,GO:0009734,GO:0048364,GO:0048367	DNA binding transcription factor activity|nucleus|transcription, DNA-templated|gravitropism|response to auxin|auxin-activated signaling pathway|root development|shoot system development	path:vvi04075	Plant hormone signal transduction
chr5	2846001	2847000	1	1	73	0	379	1	-0.26	0	0.26	VIT_205s0020g01070	VIT_205s0020g01070	10.8159	0	21.6317	Inf	Inf	0.0116207	0.479615	Up	0	0.284624	LOC100244346	IAA31; At3g17600; MKP6.16	hypothetical protein VITISV_026538 [Vitis vinifera]	GO:0003700,GO:0005634,GO:0006351,GO:0009630,GO:0009733,GO:0009734,GO:0048364,GO:0048367	DNA binding transcription factor activity|nucleus|transcription, DNA-templated|gravitropism|response to auxin|auxin-activated signaling pathway|root development|shoot system development	path:vvi04075	Plant hormone signal transduction
chr5	2848001	2849000	0.216	0.663	288	0	251	2	-0.8	0	0.8	VIT_205s0020g01070	VIT_205s0020g01070	10.8159	0	21.6317	Inf	Inf	0.0116207	0.479615	Up	0	0.284624	LOC100244346	IAA31; At3g17600; MKP6.16	hypothetical protein VITISV_026538 [Vitis vinifera]	GO:0003700,GO:0005634,GO:0006351,GO:0009630,GO:0009733,GO:0009734,GO:0048364,GO:0048367	DNA binding transcription factor activity|nucleus|transcription, DNA-templated|gravitropism|response to auxin|auxin-activated signaling pathway|root development|shoot system development	path:vvi04075	Plant hormone signal transduction
chr5	3928001	3929000	1	1	62	0	313	2	-0.64	0	0.64	VIT_205s0020g02200	VIT_205s0020g02200	515.889	764.988	266.791	0.348752	-1.51973	4.41056e-05	0.00573074	Down	6.23153	1.53567	LOC100263026		PREDICTED: uncharacterized protein LOC100263026 [Vitis vinifera]
chr5	3930001	3931000	1	1	222	4	40	0	1.8	1.8	0	VIT_205s0020g02200	VIT_205s0020g02200	515.889	764.988	266.791	0.348752	-1.51973	4.41056e-05	0.00573074	Down	6.23153	1.53567	LOC100263026		PREDICTED: uncharacterized protein LOC100263026 [Vitis vinifera]
chr5	3934001	3935000	1	1	290	1	10	0	0.34	0.34	0	VIT_205s0020g02200	VIT_205s0020g02200	515.889	764.988	266.791	0.348752	-1.51973	4.41056e-05	0.00573074	Down	6.23153	1.53567	LOC100263026		PREDICTED: uncharacterized protein LOC100263026 [Vitis vinifera]
chr5	4871001	4872000	1	1	219	0	444	2	-0.45	0	0.45	VIT_205s0020g03140	VIT_205s0020g03140	69.3119	125.233	13.3911	0.106929	-3.22527	0.000203182	0.0202691	Down	2.76068	0.256031	HT5	STP13; Synonyms=MSS1; At5g26340; F9D12.17	hexose transporter [Vitis vinifera]	GO:0005358,GO:0005886,GO:0009414,GO:0009506,GO:0009651,GO:0009679,GO:0009737,GO:0015145,GO:0015749,GO:0016021,GO:0046323	high-affinity hydrogen:glucose symporter activity|plasma membrane|response to water deprivation|plasmodesma|response to salt stress|hexose:proton symporter activity|response to abscisic acid|monosaccharide transmembrane transporter activity|monosaccharide transport|integral component of membrane|glucose import
chr5	4934001	4935000	0.0541	0.298	105	3	171	0	2.86	2.86	0	VIT_205s0020g03170	VIT_205s0020g03170	183.988	265.998	101.978	0.383379	-1.38316	0.0104369	0.449256	Down	2.86256	1.03631	LOC100251097	LOX1.5; Synonyms=POTLX-3	PREDICTED: probable linoleate 9S-lipoxygenase 5 [Vitis vinifera]	GO:0005737,GO:0016702,GO:0031408,GO:0046872	cytoplasm|oxidoreductase activity, acting on single donors with incorporation of molecular oxygen, incorporation of two atoms of oxygen|oxylipin biosynthetic process|metal ion binding	path:vvi00591	Linoleic acid metabolism
chr5	4935001	4936000	1	1	421	3	60	0	0.71	0.71	0	VIT_205s0020g03170	VIT_205s0020g03170	183.988	265.998	101.978	0.383379	-1.38316	0.0104369	0.449256	Down	2.86256	1.03631	LOC100251097	LOX1.5; Synonyms=POTLX-3	PREDICTED: probable linoleate 9S-lipoxygenase 5 [Vitis vinifera]	GO:0005737,GO:0016702,GO:0031408,GO:0046872	cytoplasm|oxidoreductase activity, acting on single donors with incorporation of molecular oxygen, incorporation of two atoms of oxygen|oxylipin biosynthetic process|metal ion binding	path:vvi00591	Linoleic acid metabolism
chr5	4937001	4938000	0.404	0.894	345	0	234	1	-0.43	0	0.43	VIT_205s0020g03170	VIT_205s0020g03170	183.988	265.998	101.978	0.383379	-1.38316	0.0104369	0.449256	Down	2.86256	1.03631	LOC100251097	LOX1.5; Synonyms=POTLX-3	PREDICTED: probable linoleate 9S-lipoxygenase 5 [Vitis vinifera]	GO:0005737,GO:0016702,GO:0031408,GO:0046872	cytoplasm|oxidoreductase activity, acting on single donors with incorporation of molecular oxygen, incorporation of two atoms of oxygen|oxylipin biosynthetic process|metal ion binding	path:vvi00591	Linoleic acid metabolism
chr5	4938001	4939000	1	1	424	3	114	0	0.71	0.71	0	VIT_205s0020g03170	VIT_205s0020g03170	183.988	265.998	101.978	0.383379	-1.38316	0.0104369	0.449256	Down	2.86256	1.03631	LOC100251097	LOX1.5; Synonyms=POTLX-3	PREDICTED: probable linoleate 9S-lipoxygenase 5 [Vitis vinifera]	GO:0005737,GO:0016702,GO:0031408,GO:0046872	cytoplasm|oxidoreductase activity, acting on single donors with incorporation of molecular oxygen, incorporation of two atoms of oxygen|oxylipin biosynthetic process|metal ion binding	path:vvi00591	Linoleic acid metabolism
chr5	4939001	4940000	1	1	153	0	343	1	-0.29	0	0.29	VIT_205s0020g03170	VIT_205s0020g03170	183.988	265.998	101.978	0.383379	-1.38316	0.0104369	0.449256	Down	2.86256	1.03631	LOC100251097	LOX1.5; Synonyms=POTLX-3	PREDICTED: probable linoleate 9S-lipoxygenase 5 [Vitis vinifera]	GO:0005737,GO:0016702,GO:0031408,GO:0046872	cytoplasm|oxidoreductase activity, acting on single donors with incorporation of molecular oxygen, incorporation of two atoms of oxygen|oxylipin biosynthetic process|metal ion binding	path:vvi00591	Linoleic acid metabolism
chr5	4978001	4979000	1	1	10	1	10	0	10	10	0	VIT_205s0020g03220	VIT_205s0020g03220	35.1265	64.0726	6.18049	0.0964608	-3.37391	0.00337314	0.198542	Down	2.64978	0.329904	LOC100263125	LECRK1 {ECO:0000303|PubMed:25485617}; Synonyms=LECRK {ECO:0000303|PubMed:24033867}; OsI_14840 {ECO:0000312|EMBL:EAY93041.1}	PREDICTED: G-type lectin S-receptor-like serine/threonine-protein kinase RLK1 [Vitis vinifera]	GO:0004674,GO:0005524,GO:0006952,GO:0016021,GO:0030246	protein serine/threonine kinase activity|ATP binding|defense response|integral component of membrane|carbohydrate binding
chr5	5000001	5001000	1	1	279	14	10	0	5.02	5.02	0	VIT_205s0020g03240	VIT_205s0020g03240	57.1177	102.904	11.3309	0.110111	-3.18297	0.000652967	0.0535665	Down	1.69017	0.194562	LOC100263125	LECRK4 {ECO:0000303|PubMed:25485617}; Os04g0202800 {ECO:0000312|EMBL:BAF14142.2}, LOC_Os04g12600 {ECO:0000305}; OsJ_13808 {ECO:0000312|EMBL:EAZ29749.1}, OSJNBb0005B05.8 {ECO:0000312|EMBL:CAE03341.2}	PREDICTED: G-type lectin S-receptor-like serine/threonine-protein kinase RLK1 [Vitis vinifera]	GO:0004674,GO:0005524,GO:0005886,GO:0006468,GO:0016021,GO:0030246	protein serine/threonine kinase activity|ATP binding|plasma membrane|protein phosphorylation|integral component of membrane|carbohydrate binding
chr5	5001001	5002000	0.371	0.858	178	0	1020	9	-0.88	0	0.88	VIT_205s0020g03240	VIT_205s0020g03240	57.1177	102.904	11.3309	0.110111	-3.18297	0.000652967	0.0535665	Down	1.69017	0.194562	LOC100263125	LECRK4 {ECO:0000303|PubMed:25485617}; Os04g0202800 {ECO:0000312|EMBL:BAF14142.2}, LOC_Os04g12600 {ECO:0000305}; OsJ_13808 {ECO:0000312|EMBL:EAZ29749.1}, OSJNBb0005B05.8 {ECO:0000312|EMBL:CAE03341.2}	PREDICTED: G-type lectin S-receptor-like serine/threonine-protein kinase RLK1 [Vitis vinifera]	GO:0004674,GO:0005524,GO:0005886,GO:0006468,GO:0016021,GO:0030246	protein serine/threonine kinase activity|ATP binding|plasma membrane|protein phosphorylation|integral component of membrane|carbohydrate binding
chr5	5004001	5005000	0.574	1	31	0	82	4	-4.88	0	4.88	VIT_205s0020g03240	VIT_205s0020g03240	57.1177	102.904	11.3309	0.110111	-3.18297	0.000652967	0.0535665	Down	1.69017	0.194562	LOC100263125	LECRK4 {ECO:0000303|PubMed:25485617}; Os04g0202800 {ECO:0000312|EMBL:BAF14142.2}, LOC_Os04g12600 {ECO:0000305}; OsJ_13808 {ECO:0000312|EMBL:EAZ29749.1}, OSJNBb0005B05.8 {ECO:0000312|EMBL:CAE03341.2}	PREDICTED: G-type lectin S-receptor-like serine/threonine-protein kinase RLK1 [Vitis vinifera]	GO:0004674,GO:0005524,GO:0005886,GO:0006468,GO:0016021,GO:0030246	protein serine/threonine kinase activity|ATP binding|plasma membrane|protein phosphorylation|integral component of membrane|carbohydrate binding
chr5	5399001	5400000	1	1	1039	7	50	0	0.67	0.67	0	VIT_205s0020g03690	VIT_205s0020g03690	331.583	475.69	187.475	0.394111	-1.34333	0.00181362	0.124938	Down	30.2605	10.9483	LOC100240811	p20	PREDICTED: uncharacterized protein YIR042C [Vitis vinifera]	GO:0008080	N-acetyltransferase activity
chr5	5625001	5626000	1	1	60	0	438	2	-0.46	0	0.46	VIT_205s0020g03970	VIT_205s0020g03970	1223.12	796.053	1650.19	2.07297	1.0517	0.000284896	0.0265344	Up	13.8645	26.7802	LOC100245945	SULTR3;1; Synonyms=ST1; At3g51895; ATEM1.15, F4F15.10	unnamed protein product, partial [Vitis vinifera]	GO:0005887,GO:0008271,GO:0008272,GO:0009507,GO:0015116,GO:0015293	integral component of plasma membrane|secondary active sulfate transmembrane transporter activity|sulfate transport|chloroplast|sulfate transmembrane transporter activity|symporter activity
chr5	5626001	5627000	1	1	50	0	311	2	-0.64	0	0.64	VIT_205s0020g03970	VIT_205s0020g03970	1223.12	796.053	1650.19	2.07297	1.0517	0.000284896	0.0265344	Up	13.8645	26.7802	LOC100245945	SULTR3;1; Synonyms=ST1; At3g51895; ATEM1.15, F4F15.10	unnamed protein product, partial [Vitis vinifera]	GO:0005887,GO:0008271,GO:0008272,GO:0009507,GO:0015116,GO:0015293	integral component of plasma membrane|secondary active sulfate transmembrane transporter activity|sulfate transport|chloroplast|sulfate transmembrane transporter activity|symporter activity
chr5	5958001	5959000	0.000148	0.00401	463	24	453	4	4.3	5.18	0.88	VIT_205s0020g04260	VIT_205s0020g04260	23.2991	46.5982	0	0	#NAME?	0.000233382	0.0225343	Down	0.583521	0	LOC100240964	ACA13; At3g22910; F5N5.8	PREDICTED: putative calcium-transporting ATPase 13, plasma membrane-type [Vitis vinifera]	GO:0005388,GO:0005516,GO:0005524,GO:0005887,GO:0043231,GO:0046872	calcium-transporting ATPase activity|calmodulin binding|ATP binding|integral component of plasma membrane|intracellular membrane-bounded organelle|metal ion binding
chr5	6001001	6002000	0.343	0.831	113	6	30	0	5.31	5.31	0	VIT_205s0020g04280	VIT_205s0020g04280	55.9987	105.817	6.18049	0.0584075	-4.0977	5.07407e-05	0.00623522	Down	1.28403	0.0744116	LOC100242476	ACA13; At3g22910; F5N5.8	PREDICTED: putative calcium-transporting ATPase 13, plasma membrane-type [Vitis vinifera]	GO:0005388,GO:0005516,GO:0005524,GO:0005887,GO:0043231,GO:0046872	calcium-transporting ATPase activity|calmodulin binding|ATP binding|integral component of plasma membrane|intracellular membrane-bounded organelle|metal ion binding
chr5	6003001	6004000	0.0394	0.244	61	4	74	0	6.56	6.56	0	VIT_205s0020g04280	VIT_205s0020g04280	55.9987	105.817	6.18049	0.0584075	-4.0977	5.07407e-05	0.00623522	Down	1.28403	0.0744116	LOC100242476	ACA13; At3g22910; F5N5.8	PREDICTED: putative calcium-transporting ATPase 13, plasma membrane-type [Vitis vinifera]	GO:0005388,GO:0005516,GO:0005524,GO:0005887,GO:0043231,GO:0046872	calcium-transporting ATPase activity|calmodulin binding|ATP binding|integral component of plasma membrane|intracellular membrane-bounded organelle|metal ion binding
chr5	6004001	6005000	0.499	0.99	190	0	204	2	-0.98	0	0.98	VIT_205s0020g04280	VIT_205s0020g04280	55.9987	105.817	6.18049	0.0584075	-4.0977	5.07407e-05	0.00623522	Down	1.28403	0.0744116	LOC100242476	ACA13; At3g22910; F5N5.8	PREDICTED: putative calcium-transporting ATPase 13, plasma membrane-type [Vitis vinifera]	GO:0005388,GO:0005516,GO:0005524,GO:0005887,GO:0043231,GO:0046872	calcium-transporting ATPase activity|calmodulin binding|ATP binding|integral component of plasma membrane|intracellular membrane-bounded organelle|metal ion binding
chr5	6005001	6006000	0.48	0.973	247	0	228	1	-0.44	0	0.44	VIT_205s0020g04280	VIT_205s0020g04280	55.9987	105.817	6.18049	0.0584075	-4.0977	5.07407e-05	0.00623522	Down	1.28403	0.0744116	LOC100242476	ACA13; At3g22910; F5N5.8	PREDICTED: putative calcium-transporting ATPase 13, plasma membrane-type [Vitis vinifera]	GO:0005388,GO:0005516,GO:0005524,GO:0005887,GO:0043231,GO:0046872	calcium-transporting ATPase activity|calmodulin binding|ATP binding|integral component of plasma membrane|intracellular membrane-bounded organelle|metal ion binding
chr5	6027001	6028000	1	1	60	1	10	0	1.67	1.67	0	VIT_205s0020g04300	VIT_205s0020g04300	9.22257	18.4451	0	0	#NAME?	0.0229701	0.801819	Down	0.237533	0.0117856	LOC100259585	ACA13; At3g22910; F5N5.8	PREDICTED: putative calcium-transporting ATPase 13, plasma membrane-type [Vitis vinifera]	GO:0005388,GO:0005516,GO:0005524,GO:0005887,GO:0043231,GO:0046872	calcium-transporting ATPase activity|calmodulin binding|ATP binding|integral component of plasma membrane|intracellular membrane-bounded organelle|metal ion binding
chr5	6028001	6029000	0.211	0.654	280	4	288	1	1.08	1.43	0.35	VIT_205s0020g04300	VIT_205s0020g04300	9.22257	18.4451	0	0	#NAME?	0.0229701	0.801819	Down	0.237533	0.0117856	LOC100259585	ACA13; At3g22910; F5N5.8	PREDICTED: putative calcium-transporting ATPase 13, plasma membrane-type [Vitis vinifera]	GO:0005388,GO:0005516,GO:0005524,GO:0005887,GO:0043231,GO:0046872	calcium-transporting ATPase activity|calmodulin binding|ATP binding|integral component of plasma membrane|intracellular membrane-bounded organelle|metal ion binding
chr5	6034001	6035000	1	1	143	0	525	2	-0.38	0	0.38	VIT_205s0020g04300	VIT_205s0020g04300	9.22257	18.4451	0	0	#NAME?	0.0229701	0.801819	Down	0.237533	0.0117856	LOC100259585	ACA13; At3g22910; F5N5.8	PREDICTED: putative calcium-transporting ATPase 13, plasma membrane-type [Vitis vinifera]	GO:0005388,GO:0005516,GO:0005524,GO:0005887,GO:0043231,GO:0046872	calcium-transporting ATPase activity|calmodulin binding|ATP binding|integral component of plasma membrane|intracellular membrane-bounded organelle|metal ion binding
chr5	6036001	6037000	1	1	10	0	368	2	-0.54	0	0.54	VIT_205s0020g04300	VIT_205s0020g04300	9.22257	18.4451	0	0	#NAME?	0.0229701	0.801819	Down	0.237533	0.0117856	LOC100259585	ACA13; At3g22910; F5N5.8	PREDICTED: putative calcium-transporting ATPase 13, plasma membrane-type [Vitis vinifera]	GO:0005388,GO:0005516,GO:0005524,GO:0005887,GO:0043231,GO:0046872	calcium-transporting ATPase activity|calmodulin binding|ATP binding|integral component of plasma membrane|intracellular membrane-bounded organelle|metal ion binding
chr5	6153001	6154000	0.357	0.845	90	0	50	1	-2	0	2	VIT_205s0020g04390	VIT_205s0020g04390	63.6057	109.7	17.5114	0.15963	-2.6472	0.00219488	0.143034	Down	1.38254	0.220029	LOC100254571	ACA13; At3g22910; F5N5.8	PREDICTED: putative calcium-transporting ATPase 13, plasma membrane-type [Vitis vinifera]	GO:0005388,GO:0005516,GO:0005524,GO:0005887,GO:0043231,GO:0046872	calcium-transporting ATPase activity|calmodulin binding|ATP binding|integral component of plasma membrane|intracellular membrane-bounded organelle|metal ion binding
chr5	6370001	6371000	1	1	20	0	443	3	-0.68	0	0.68	VIT_205s0020g04560	VIT_205s0020g04560	93.1335	137.853	48.4138	0.351199	-1.50964	0.0329681	0.984319	Down	1.98741	0.554722	LOC100252782	PUB44; Synonyms=SAUL1; At1g20780; F2D10.27	PREDICTED: U-box domain-containing protein 43-like [Vitis vinifera]	GO:0004842,GO:0005634,GO:0005737,GO:0005886,GO:0010115,GO:0010150,GO:0010271,GO:0010380,GO:0070696,GO:0090359	ubiquitin-protein transferase activity|nucleus|cytoplasm|plasma membrane|regulation of abscisic acid biosynthetic process|leaf senescence|regulation of chlorophyll catabolic process|regulation of chlorophyll biosynthetic process|transmembrane receptor protein serine/threonine kinase binding|negative regulation of abscisic acid biosynthetic process
chr5	6371001	6372000	0.0344	0.222	285	1	80	3	-3.4	0.35	3.75	VIT_205s0020g04560	VIT_205s0020g04560	93.1335	137.853	48.4138	0.351199	-1.50964	0.0329681	0.984319	Down	1.98741	0.554722	LOC100252782	PUB44; Synonyms=SAUL1; At1g20780; F2D10.27	PREDICTED: U-box domain-containing protein 43-like [Vitis vinifera]	GO:0004842,GO:0005634,GO:0005737,GO:0005886,GO:0010115,GO:0010150,GO:0010271,GO:0010380,GO:0070696,GO:0090359	ubiquitin-protein transferase activity|nucleus|cytoplasm|plasma membrane|regulation of abscisic acid biosynthetic process|leaf senescence|regulation of chlorophyll catabolic process|regulation of chlorophyll biosynthetic process|transmembrane receptor protein serine/threonine kinase binding|negative regulation of abscisic acid biosynthetic process
chr5	6374001	6375000	0.601	1	10	0	94	12	-12.77	0	12.77	VIT_205s0020g04560	VIT_205s0020g04560	93.1335	137.853	48.4138	0.351199	-1.50964	0.0329681	0.984319	Down	1.98741	0.554722	LOC100252782	PUB44; Synonyms=SAUL1; At1g20780; F2D10.27	PREDICTED: U-box domain-containing protein 43-like [Vitis vinifera]	GO:0004842,GO:0005634,GO:0005737,GO:0005886,GO:0010115,GO:0010150,GO:0010271,GO:0010380,GO:0070696,GO:0090359	ubiquitin-protein transferase activity|nucleus|cytoplasm|plasma membrane|regulation of abscisic acid biosynthetic process|leaf senescence|regulation of chlorophyll catabolic process|regulation of chlorophyll biosynthetic process|transmembrane receptor protein serine/threonine kinase binding|negative regulation of abscisic acid biosynthetic process
chr5	6375001	6376000	0.199	0.635	318	0	257	2	-0.78	0	0.78	VIT_205s0020g04560	VIT_205s0020g04560	93.1335	137.853	48.4138	0.351199	-1.50964	0.0329681	0.984319	Down	1.98741	0.554722	LOC100252782	PUB44; Synonyms=SAUL1; At1g20780; F2D10.27	PREDICTED: U-box domain-containing protein 43-like [Vitis vinifera]	GO:0004842,GO:0005634,GO:0005737,GO:0005886,GO:0010115,GO:0010150,GO:0010271,GO:0010380,GO:0070696,GO:0090359	ubiquitin-protein transferase activity|nucleus|cytoplasm|plasma membrane|regulation of abscisic acid biosynthetic process|leaf senescence|regulation of chlorophyll catabolic process|regulation of chlorophyll biosynthetic process|transmembrane receptor protein serine/threonine kinase binding|negative regulation of abscisic acid biosynthetic process
chr5	7603001	7604000	0.499	0.99	95	0	107	2	-1.87	0	1.87	VIT_205s0049g00550	VIT_205s0049g00550	1744.93	2379.42	1110.43	0.46668	-1.0995	4.86581e-05	0.00612087	Down	82.4834	36.8612	LOC100240909		PREDICTED: early nodulin-75-like [Vitis vinifera]
chr5	7605001	7606000	0.207	0.648	510	0	133	1	-0.75	0	0.75	VIT_205s0049g00550	VIT_205s0049g00550	1744.93	2379.42	1110.43	0.46668	-1.0995	4.86581e-05	0.00612087	Down	82.4834	36.8612	LOC100240909		PREDICTED: early nodulin-75-like [Vitis vinifera]
chr5	7645001	7646000	0.0635	0.329	73	2	400	1	2.49	2.74	0.25	VIT_205s0049g00600	VIT_205s0049g00600	70.0937	116.496	23.6919	0.203372	-2.29781	0.00487783	0.261255	Down	9.29293	1.61964	LOC109122628		unnamed protein product, partial [Vitis vinifera]
chr5	7710001	7711000	0.25	0.711	103	3	90	0	2.91	2.91	0	VIT_205s0049g00680	VIT_205s0049g00680	255.508	386.377	124.64	0.322586	-1.63224	0.000659526	0.0538076	Down	17.882	11.3673	LOC109122629		unnamed protein product, partial [Vitis vinifera]
chr5	7779001	7780000	0.045	0.265	631	8	528	1	1.08	1.27	0.19	VIT_205s0049g00740	VIT_205s0049g00740	1731.53	2379.42	1083.65	0.455424	-1.13472	2.8758e-05	0.0039307	Down	52.1466	19.1664	LOC100247822		PREDICTED: repetitive proline-rich cell wall protein 2-like [Vitis vinifera]
chr5	7782001	7783000	9.46e-05	0.00281	371	11	662	1	2.81	2.96	0.15	VIT_205s0049g00740	VIT_205s0049g00740	1731.53	2379.42	1083.65	0.455424	-1.13472	2.8758e-05	0.0039307	Down	52.1466	19.1664	LOC100247822		PREDICTED: repetitive proline-rich cell wall protein 2-like [Vitis vinifera]
chr5	7785001	7786000	1	1	248	1	121	0	0.4	0.4	0	VIT_205s0049g00750	VIT_205s0049g00750	6231.29	9654.57	2808	0.290847	-1.78167	3.39399e-13	2.2325e-10	Down	580.619	166.994	LOC100242457		PREDICTED: proline-rich 33 kDa extensin-related protein-like [Vitis vinifera]
chr5	7797001	7798000	1	1	211	1	90	0	0.47	0.47	0	VIT_205s0049g00780	VIT_205s0049g00780	2072.6	3084.22	1060.98	0.344004	-1.5395	7.46102e-09	2.15133e-06	Down	50.0997	17.0482	LOC100244140		PREDICTED: early nodulin-75-like isoform X1 [Vitis vinifera]
chr5	7798001	7799000	1	1	909	3	254	0	0.33	0.33	0	VIT_205s0049g00780	VIT_205s0049g00780	2072.6	3084.22	1060.98	0.344004	-1.5395	7.46102e-09	2.15133e-06	Down	50.0997	17.0482	LOC100244140		PREDICTED: early nodulin-75-like isoform X1 [Vitis vinifera]
chr5	7799001	7800000	1	1	33	0	121	3	-2.48	0	2.48	VIT_205s0049g00780	VIT_205s0049g00780	2072.6	3084.22	1060.98	0.344004	-1.5395	7.46102e-09	2.15133e-06	Down	50.0997	17.0482	LOC100244140		PREDICTED: early nodulin-75-like isoform X1 [Vitis vinifera]
chr5	7854001	7855000	0.455	0.947	259	0	216	1	-0.46	0	0.46	VIT_205s0049g00840	VIT_205s0049g00840	6488.46	10981.7	1995.27	0.181691	-2.46044	1.01161e-22	1.63795e-19	Down	84.8508	29.223	LOC100249526		PREDICTED: early nodulin-75-like [Vitis vinifera]
chr5	8522001	8523000	0.281	0.757	32	1	82	0	3.12	3.12	0	VIT_205s0049g01290	VIT_205s0049g01290	36.7013	63.1018	10.3008	0.163241	-2.61492	0.014711	0.578788	Down	1.41949	0.313777	LOC100245916	At3g23360; MLM24.7, MLM24.9	PREDICTED: putative protein phosphatase 2C-like protein 44 [Vitis vinifera]	GO:0004722	protein serine/threonine phosphatase activity
chr5	8523001	8524000	1	1	10	0	20	1	-5	0	5	VIT_205s0049g01290	VIT_205s0049g01290	36.7013	63.1018	10.3008	0.163241	-2.61492	0.014711	0.578788	Down	1.41949	0.313777	LOC100245916	At3g23360; MLM24.7, MLM24.9	PREDICTED: putative protein phosphatase 2C-like protein 44 [Vitis vinifera]	GO:0004722	protein serine/threonine phosphatase activity
chr5	8928001	8929000	0.212	0.656	30	1	490	3	2.72	3.33	0.61	VIT_205s0049g01550	VIT_205s0049g01550	470.755	640.726	300.784	0.469443	-1.09098	0.0039626	0.222423	Down	9.09414	3.89329	LOC100263051	NPF5.2; Synonyms=PTR3-A; At5g46050; MCL19.10	PREDICTED: protein NRT1/ PTR FAMILY 5.2 [Vitis vinifera]	GO:0009611,GO:0009737,GO:0009751,GO:0009753,GO:0016021,GO:0022857,GO:0042538,GO:0042742,GO:0042936,GO:0042937,GO:0042938,GO:0042939,GO:0043201,GO:0080052,GO:0080053	response to wounding|response to abscisic acid|response to salicylic acid|response to jasmonic acid|integral component of membrane|transmembrane transporter activity|hyperosmotic salinity response|defense response to bacterium|dipeptide transporter activity|tripeptide transporter activity|dipeptide transport|tripeptide transport|response to leucine|response to histidine|response to phenylalanine
chr5	9182001	9183000	0.298	0.782	71	1	567	2	1.06	1.41	0.35	VIT_205s0049g01740	VIT_205s0049g01740	8.24066	0	16.4813	Inf	Inf	0.0300913	0.93697	Up	0	0.049433	LOC104879302	ARPC2B; At2g33385; F4P9.42	PREDICTED: uncharacterized protein LOC104879302 [Vitis vinifera]	GO:0005200,GO:0005737,GO:0005885,GO:0007015,GO:0030041,GO:0034314,GO:0042995,GO:0051015	structural constituent of cytoskeleton|cytoplasm|Arp2/3 protein complex|actin filament organization|actin filament polymerization|Arp2/3 complex-mediated actin nucleation|cell projection|actin filament binding
chr5	9183001	9184000	0.171	0.586	277	4	366	1	1.17	1.44	0.27	VIT_205s0049g01740	VIT_205s0049g01740	8.24066	0	16.4813	Inf	Inf	0.0300913	0.93697	Up	0	0.049433	LOC104879302	ARPC2B; At2g33385; F4P9.42	PREDICTED: uncharacterized protein LOC104879302 [Vitis vinifera]	GO:0005200,GO:0005737,GO:0005885,GO:0007015,GO:0030041,GO:0034314,GO:0042995,GO:0051015	structural constituent of cytoskeleton|cytoplasm|Arp2/3 protein complex|actin filament organization|actin filament polymerization|Arp2/3 complex-mediated actin nucleation|cell projection|actin filament binding
chr5	9184001	9185000	0.0232	0.171	352	0	227	4	-1.76	0	1.76	VIT_205s0049g01740	VIT_205s0049g01740	8.24066	0	16.4813	Inf	Inf	0.0300913	0.93697	Up	0	0.049433	LOC104879302	ARPC2B; At2g33385; F4P9.42	PREDICTED: uncharacterized protein LOC104879302 [Vitis vinifera]	GO:0005200,GO:0005737,GO:0005885,GO:0007015,GO:0030041,GO:0034314,GO:0042995,GO:0051015	structural constituent of cytoskeleton|cytoplasm|Arp2/3 protein complex|actin filament organization|actin filament polymerization|Arp2/3 complex-mediated actin nucleation|cell projection|actin filament binding
chr5	9185001	9186000	0.303	0.786	207	0	377	4	-1.06	0	1.06	VIT_205s0049g01740	VIT_205s0049g01740	8.24066	0	16.4813	Inf	Inf	0.0300913	0.93697	Up	0	0.049433	LOC104879302	ARPC2B; At2g33385; F4P9.42	PREDICTED: uncharacterized protein LOC104879302 [Vitis vinifera]	GO:0005200,GO:0005737,GO:0005885,GO:0007015,GO:0030041,GO:0034314,GO:0042995,GO:0051015	structural constituent of cytoskeleton|cytoplasm|Arp2/3 protein complex|actin filament organization|actin filament polymerization|Arp2/3 complex-mediated actin nucleation|cell projection|actin filament binding
chr5	9187001	9188000	0.249	0.711	199	2	411	1	0.76	1.01	0.24	VIT_205s0049g01740	VIT_205s0049g01740	8.24066	0	16.4813	Inf	Inf	0.0300913	0.93697	Up	0	0.049433	LOC104879302	ARPC2B; At2g33385; F4P9.42	PREDICTED: uncharacterized protein LOC104879302 [Vitis vinifera]	GO:0005200,GO:0005737,GO:0005885,GO:0007015,GO:0030041,GO:0034314,GO:0042995,GO:0051015	structural constituent of cytoskeleton|cytoplasm|Arp2/3 protein complex|actin filament organization|actin filament polymerization|Arp2/3 complex-mediated actin nucleation|cell projection|actin filament binding
chr5	9189001	9190000	0.0921	0.412	190	2	435	0	1.05	1.05	0	VIT_205s0049g01740	VIT_205s0049g01740	8.24066	0	16.4813	Inf	Inf	0.0300913	0.93697	Up	0	0.049433	LOC104879302	ARPC2B; At2g33385; F4P9.42	PREDICTED: uncharacterized protein LOC104879302 [Vitis vinifera]	GO:0005200,GO:0005737,GO:0005885,GO:0007015,GO:0030041,GO:0034314,GO:0042995,GO:0051015	structural constituent of cytoskeleton|cytoplasm|Arp2/3 protein complex|actin filament organization|actin filament polymerization|Arp2/3 complex-mediated actin nucleation|cell projection|actin filament binding
chr5	18934001	18935000	1	1	80	0	487	1	-0.21	0	0.21	VIT_205s0062g00700	VIT_205s0062g00700	67.0035	116.496	17.5114	0.150318	-2.73391	0.00132533	0.0965292	Down	3.88353	0.58758	LOC100253245	UGT75L6; Synonyms=UGT1	PREDICTED: crocetin glucosyltransferase, chloroplastic [Vitis vinifera]	GO:0008152,GO:0009507,GO:0016758	metabolic process|chloroplast|transferase activity, transferring hexosyl groups
chr5	20725001	20726000	4.62e-05	0.00158	526	20	541	2	3.43	3.8	0.37	VIT_205s0124g00240	VIT_205s0124g00240	86.5565	133.97	39.1431	0.292178	-1.77508	0.015721	0.607679	Down	4.39409	1.04926	LOC100246361	BHLH128; Synonyms=EN74; At1g05805; T20M3.7	unnamed protein product, partial [Vitis vinifera]	GO:0001046,GO:0001228,GO:0003700,GO:0005634,GO:0005829,GO:0006355,GO:0006366,GO:0010119,GO:0044212,GO:0046983	core promoter sequence-specific DNA binding|transcriptional activator activity, RNA polymerase II transcription regulatory region sequence-specific DNA binding|DNA binding transcription factor activity|nucleus|cytosol|regulation of transcription, DNA-templated|transcription from RNA polymerase II promoter|regulation of stomatal movement|transcription regulatory region DNA binding|protein dimeriza…
chr5	20727001	20728000	0.0639	0.33	477	9	221	0	1.89	1.89	0	VIT_205s0124g00240	VIT_205s0124g00240	86.5565	133.97	39.1431	0.292178	-1.77508	0.015721	0.607679	Down	4.39409	1.04926	LOC100246361	BHLH128; Synonyms=EN74; At1g05805; T20M3.7	unnamed protein product, partial [Vitis vinifera]	GO:0001046,GO:0001228,GO:0003700,GO:0005634,GO:0005829,GO:0006355,GO:0006366,GO:0010119,GO:0044212,GO:0046983	core promoter sequence-specific DNA binding|transcriptional activator activity, RNA polymerase II transcription regulatory region sequence-specific DNA binding|DNA binding transcription factor activity|nucleus|cytosol|regulation of transcription, DNA-templated|transcription from RNA polymerase II promoter|regulation of stomatal movement|transcription regulatory region DNA binding|protein dimeriza…
chr5	23515001	23516000	0.61	1	567	10	60	0	1.76	1.76	0	VIT_205s0094g00160	VIT_205s0094g00160	7.76637	15.5327	0	0	#NAME?	0.0392439	1	Down	1.95186	0	LOC100250774		hypothetical protein VITISV_012616 [Vitis vinifera]
chr5	23518001	23519000	1	1	256	6	30	0	2.34	2.34	0	VIT_205s0094g00160	VIT_205s0094g00160	7.76637	15.5327	0	0	#NAME?	0.0392439	1	Down	1.95186	0	LOC100250774		hypothetical protein VITISV_012616 [Vitis vinifera]
chr5	23650001	23651000	0.248	0.71	53	1	347	1	1.6	1.89	0.29	VIT_205s0094g00330	VIT_205s0094g00330	194.9	364.049	25.752	0.0707379	-3.82137	2.21831e-10	8.64688e-08	Down	21.8518	1.47242	LOC100252703	Cht5; Os04g0494100, LOC_Os04g41680; OsJ_15308, OSJNBb0091E11.12	PREDICTED: chitinase 5 [Vitis vinifera]	GO:0000272,GO:0004568,GO:0006032,GO:0006952,GO:0008061,GO:0016998	polysaccharide catabolic process|chitinase activity|chitin catabolic process|defense response|chitin binding|cell wall macromolecule catabolic process	path:vvi00520	Amino sugar and nucleotide sugar metabolism
chr5	23652001	23653000	0.315	0.8	70	1	152	0	1.43	1.43	0	VIT_205s0094g00330	VIT_205s0094g00330	194.9	364.049	25.752	0.0707379	-3.82137	2.21831e-10	8.64688e-08	Down	21.8518	1.47242	LOC100252703	Cht5; Os04g0494100, LOC_Os04g41680; OsJ_15308, OSJNBb0091E11.12	PREDICTED: chitinase 5 [Vitis vinifera]	GO:0000272,GO:0004568,GO:0006032,GO:0006952,GO:0008061,GO:0016998	polysaccharide catabolic process|chitinase activity|chitin catabolic process|defense response|chitin binding|cell wall macromolecule catabolic process	path:vvi00520	Amino sugar and nucleotide sugar metabolism
chr6	778001	779000	5.6e-07	3.88e-05	340	29	212	0	8.53	8.53	0	VIT_206s0004g00620	VIT_206s0004g00620	298.827	199.013	398.642	2.00309	1.00223	0.0238006	0.822624	Up	3.32655	4.85419	LOC100241560	PTC52; Synonyms=ACD1-like, TIC55-IV; At4g25650; L73G19.30	PREDICTED: protochlorophyllide-dependent translocon component 52, chloroplastic-like [Vitis vinifera]	GO:0009507,GO:0009536,GO:0009706,GO:0009941,GO:0010277,GO:0015031,GO:0016021,GO:0046872,GO:0051537	chloroplast|plastid|chloroplast inner membrane|chloroplast envelope|chlorophyllide a oxygenase [overall] activity|protein transport|integral component of membrane|metal ion binding|2 iron, 2 sulfur cluster binding
chr6	779001	780000	0.00132	0.022	261	16	414	6	4.68	6.13	1.45	VIT_206s0004g00620	VIT_206s0004g00620	298.827	199.013	398.642	2.00309	1.00223	0.0238006	0.822624	Up	3.32655	4.85419	LOC100241560	PTC52; Synonyms=ACD1-like, TIC55-IV; At4g25650; L73G19.30	PREDICTED: protochlorophyllide-dependent translocon component 52, chloroplastic-like [Vitis vinifera]	GO:0009507,GO:0009536,GO:0009706,GO:0009941,GO:0010277,GO:0015031,GO:0016021,GO:0046872,GO:0051537	chloroplast|plastid|chloroplast inner membrane|chloroplast envelope|chlorophyllide a oxygenase [overall] activity|protein transport|integral component of membrane|metal ion binding|2 iron, 2 sulfur cluster binding
chr6	780001	781000	0.0277	0.193	73	2	363	0	2.74	2.74	0	VIT_206s0004g00620	VIT_206s0004g00620	298.827	199.013	398.642	2.00309	1.00223	0.0238006	0.822624	Up	3.32655	4.85419	LOC100241560	PTC52; Synonyms=ACD1-like, TIC55-IV; At4g25650; L73G19.30	PREDICTED: protochlorophyllide-dependent translocon component 52, chloroplastic-like [Vitis vinifera]	GO:0009507,GO:0009536,GO:0009706,GO:0009941,GO:0010277,GO:0015031,GO:0016021,GO:0046872,GO:0051537	chloroplast|plastid|chloroplast inner membrane|chloroplast envelope|chlorophyllide a oxygenase [overall] activity|protein transport|integral component of membrane|metal ion binding|2 iron, 2 sulfur cluster binding
chr6	783001	784000	0.335	0.821	458	0	1288	5	-0.39	0	0.39	VIT_206s0004g00620	VIT_206s0004g00620	298.827	199.013	398.642	2.00309	1.00223	0.0238006	0.822624	Up	3.32655	4.85419	LOC100241560	PTC52; Synonyms=ACD1-like, TIC55-IV; At4g25650; L73G19.30	PREDICTED: protochlorophyllide-dependent translocon component 52, chloroplastic-like [Vitis vinifera]	GO:0009507,GO:0009536,GO:0009706,GO:0009941,GO:0010277,GO:0015031,GO:0016021,GO:0046872,GO:0051537	chloroplast|plastid|chloroplast inner membrane|chloroplast envelope|chlorophyllide a oxygenase [overall] activity|protein transport|integral component of membrane|metal ion binding|2 iron, 2 sulfur cluster binding
chr6	1111001	1112000	1.68e-26	1.37e-23	404	31	205	93	-37.69	7.67	45.37	VIT_206s0004g01015	VIT_206s0004g01015	313.482	545.588	81.3765	0.149154	-2.74513	4.25307e-09	1.31651e-06	Down	63.5506	8.91891	LOC100248431	DIR7; At3g13650; MMM17.4	PREDICTED: dirigent protein 22-like [Vitis vinifera]	GO:0016853,GO:0048046	isomerase activity|apoplast
chr6	1142001	1143000	4.17e-09	5.05e-07	30	7	397	0	23.33	23.33	0	VIT_206s0004g01030	VIT_206s0004g01030	89.4319	174.743	4.12033	0.0235793	-5.40634	9.94266e-09	2.75372e-06	Down	23.8293	0.665257	LOC100241568	DIR7; At3g13650; MMM17.4	PREDICTED: dirigent protein 22 [Vitis vinifera]	GO:0016853,GO:0048046	isomerase activity|apoplast
chr6	1149001	1150000	0.0091	0.0897	100	6	301	3	5	6	1	VIT_206s0004g01040	VIT_206s0004g01040	173.761	331.042	16.4813	0.0497862	-4.32811	4.04521e-11	1.89217e-08	Down	30.7776	1.55788	LOC100246695	DIR7; At3g13650; MMM17.4	PREDICTED: dirigent protein 22-like [Vitis vinifera]	GO:0016853,GO:0048046	isomerase activity|apoplast
chr6	2073001	2074000	1	1	322	3	50	0	0.93	0.93	0	VIT_206s0004g01670	VIT_206s0004g01670	23.9327	42.7151	5.15041	0.120576	-3.05199	0.0205394	0.742479	Down	1.28435	0.151208	LOC100260304	UGT92A1; At5g12890; T24H18.60	PREDICTED: UDP-glycosyltransferase 92A1 [Vitis vinifera]	GO:0008152,GO:0043231,GO:0080043,GO:0080044	metabolic process|intracellular membrane-bounded organelle|quercetin 3-O-glucosyltransferase activity|quercetin 7-O-glucosyltransferase activity
chr6	3233001	3234000	0.299	0.782	315	1	61	1	-1.32	0.32	1.64	VIT_206s0004g02620	VIT_206s0004g02620	108.162	50.4814	165.843	3.28523	1.716	0.0106485	0.456347	Up	0.674453	1.98227	LOC100241575	PAL	PREDICTED: phenylalanine ammonia-lyase [Vitis vinifera]	GO:0005737,GO:0006559,GO:0009800,GO:0045548	cytoplasm|L-phenylalanine catabolic process|cinnamic acid biosynthetic process|phenylalanine ammonia-lyase activity	path:vvi00360,path:vvi00940	Phenylalanine metabolism|Phenylpropanoid biosynthesis
chr6	3234001	3235000	0.156	0.557	82	2	363	2	1.89	2.44	0.55	VIT_206s0004g02620	VIT_206s0004g02620	108.162	50.4814	165.843	3.28523	1.716	0.0106485	0.456347	Up	0.674453	1.98227	LOC100241575	PAL	PREDICTED: phenylalanine ammonia-lyase [Vitis vinifera]	GO:0005737,GO:0006559,GO:0009800,GO:0045548	cytoplasm|L-phenylalanine catabolic process|cinnamic acid biosynthetic process|phenylalanine ammonia-lyase activity	path:vvi00360,path:vvi00940	Phenylalanine metabolism|Phenylpropanoid biosynthesis
chr6	3236001	3237000	0.0621	0.325	10	1	777	4	9.49	10	0.51	VIT_206s0004g02620	VIT_206s0004g02620	108.162	50.4814	165.843	3.28523	1.716	0.0106485	0.456347	Up	0.674453	1.98227	LOC100241575	PAL	PREDICTED: phenylalanine ammonia-lyase [Vitis vinifera]	GO:0005737,GO:0006559,GO:0009800,GO:0045548	cytoplasm|L-phenylalanine catabolic process|cinnamic acid biosynthetic process|phenylalanine ammonia-lyase activity	path:vvi00360,path:vvi00940	Phenylalanine metabolism|Phenylpropanoid biosynthesis
chr6	6216001	6217000	1	1	566	5	30	0	0.88	0.88	0	VIT_206s0004g05340	VIT_206s0004g05340	43.1449	3.88319	82.4066	21.2214	4.40745	0.000122855	0.0137552	Up	0.130783	3.48293	LOC100262098	At2g29260 {ECO:0000312|Araport:AT2G29260}; F16P2.36 {ECO:0000312|EMBL:AAC95209.1}	hypothetical protein VITISV_016038 [Vitis vinifera]	GO:0009507,GO:0016491	chloroplast|oxidoreductase activity	path:vvi00960	Tropane, piperidine and pyridine alkaloid biosynthesis
chr6	6493001	6494000	1	1	188	0	521	2	-0.38	0	0.38	VIT_206s0004g05700	VIT_206s0004g05700	10.1934	20.3867	0	0	#NAME?	0.0161887	0.620685	Down	0.542927	0	LOC100244980	GSTU8; At3g09270; F3L24.14	unnamed protein product, partial [Vitis vinifera]	GO:0004364,GO:0005737,GO:0005829,GO:0006749,GO:0009407,GO:0046686	glutathione transferase activity|cytoplasm|cytosol|glutathione metabolic process|toxin catabolic process|response to cadmium ion	path:vvi00480	Glutathione metabolism
chr6	6524001	6525000	1	1	179	1	105	0	0.56	0.56	0	VIT_206s0004g05780	VIT_206s0004g05780	370.133	495.106	245.159	0.495165	-1.01402	0.0135161	0.541965	Down	10.9645	5.06783	LOC100267375	UGT76A2; Synonyms=UGT7	PREDICTED: UDP-glucose iridoid glucosyltransferase-like [Vitis vinifera]	GO:0035251,GO:1900994	UDP-glucosyltransferase activity|(-)-secologanin biosynthetic process
chr6	6527001	6528000	0.00387	0.0487	10	2	143	0	20	20	0	VIT_206s0004g05780	VIT_206s0004g05780	370.133	495.106	245.159	0.495165	-1.01402	0.0135161	0.541965	Down	10.9645	5.06783	LOC100267375	UGT76A2; Synonyms=UGT7	PREDICTED: UDP-glucose iridoid glucosyltransferase-like [Vitis vinifera]	GO:0035251,GO:1900994	UDP-glucosyltransferase activity|(-)-secologanin biosynthetic process
chr6	6883001	6884000	0.501	0.99	114	0	134	2	-1.49	0	1.49	VIT_206s0004g06090	VIT_206s0004g06090	14.8473	2.91239	26.7821	9.19593	3.201	0.0499209	1	Up	0	0.496593	LOC100267265	LAC22; Os11g0708100, LOC_Os11g48060; OsJ_033548	PREDICTED: laccase-4 [Vitis vinifera]	GO:0005507,GO:0016722,GO:0046274,GO:0048046,GO:0052716	copper ion binding|oxidoreductase activity, oxidizing metal ions|lignin catabolic process|apoplast|hydroquinone:oxygen oxidoreductase activity
chr6	6884001	6885000	0.0587	0.314	185	0	385	8	-2.08	0	2.08	VIT_206s0004g06090	VIT_206s0004g06090	14.8473	2.91239	26.7821	9.19593	3.201	0.0499209	1	Up	0	0.496593	LOC100267265	LAC22; Os11g0708100, LOC_Os11g48060; OsJ_033548	PREDICTED: laccase-4 [Vitis vinifera]	GO:0005507,GO:0016722,GO:0046274,GO:0048046,GO:0052716	copper ion binding|oxidoreductase activity, oxidizing metal ions|lignin catabolic process|apoplast|hydroquinone:oxygen oxidoreductase activity
chr6	7528001	7529000	0.024	0.175	110	3	461	1	2.51	2.73	0.22	VIT_206s0004g06830	VIT_206s0004g06830	2304.76	1097.97	3511.55	3.19822	1.67727	1.8931e-10	7.70155e-08	Up	18.3804	59.156	LOC100241610	ASN1; Synonyms=DIN6; At3g47340; T21L8.90	unnamed protein product, partial [Vitis vinifera]	GO:0004066,GO:0005524,GO:0006529,GO:0006541,GO:0009063,GO:0009646,GO:0009744,GO:0009749,GO:0009750,GO:0042803,GO:0043617,GO:0070981	asparagine synthase (glutamine-hydrolyzing) activity|ATP binding|asparagine biosynthetic process|glutamine metabolic process|cellular amino acid catabolic process|response to absence of light|response to sucrose|response to glucose|response to fructose|protein homodimerization activity|cellular response to sucrose starvation|L-asparagine biosynthetic process	path:vvi00250	Alanine, aspartate and glutamate metabolism
chr6	7529001	7530000	1	1	50	0	630	1	-0.16	0	0.16	VIT_206s0004g06830	VIT_206s0004g06830	2304.76	1097.97	3511.55	3.19822	1.67727	1.8931e-10	7.70155e-08	Up	18.3804	59.156	LOC100241610	ASN1; Synonyms=DIN6; At3g47340; T21L8.90	unnamed protein product, partial [Vitis vinifera]	GO:0004066,GO:0005524,GO:0006529,GO:0006541,GO:0009063,GO:0009646,GO:0009744,GO:0009749,GO:0009750,GO:0042803,GO:0043617,GO:0070981	asparagine synthase (glutamine-hydrolyzing) activity|ATP binding|asparagine biosynthetic process|glutamine metabolic process|cellular amino acid catabolic process|response to absence of light|response to sucrose|response to glucose|response to fructose|protein homodimerization activity|cellular response to sucrose starvation|L-asparagine biosynthetic process	path:vvi00250	Alanine, aspartate and glutamate metabolism
chr6	7531001	7532000	0.247	0.709	91	3	83	0	3.3	3.3	0	VIT_206s0004g06830	VIT_206s0004g06830	2304.76	1097.97	3511.55	3.19822	1.67727	1.8931e-10	7.70155e-08	Up	18.3804	59.156	LOC100241610	ASN1; Synonyms=DIN6; At3g47340; T21L8.90	unnamed protein product, partial [Vitis vinifera]	GO:0004066,GO:0005524,GO:0006529,GO:0006541,GO:0009063,GO:0009646,GO:0009744,GO:0009749,GO:0009750,GO:0042803,GO:0043617,GO:0070981	asparagine synthase (glutamine-hydrolyzing) activity|ATP binding|asparagine biosynthetic process|glutamine metabolic process|cellular amino acid catabolic process|response to absence of light|response to sucrose|response to glucose|response to fructose|protein homodimerization activity|cellular response to sucrose starvation|L-asparagine biosynthetic process	path:vvi00250	Alanine, aspartate and glutamate metabolism
chr6	16566001	16567000	1	1	677	4	40	0	0.59	0.59	0	VIT_206s0009g03360	VIT_206s0009g03360	75.7592	116.496	35.0228	0.300636	-1.73391	0.0247417	0.833678	Down	3.48136	0.970385	LOC100250010	HPAT3 {ECO:0000303|PubMed:24036508}; At5g13500 {ECO:0000312|Araport:AT5G13500}; T6I14.30 {ECO:0000312|EMBL:CAC05427.1}	PREDICTED: uncharacterized protein LOC100250010 [Vitis vinifera]	GO:0005768,GO:0005794,GO:0005802,GO:0016021,GO:0016757,GO:1990585	endosome|Golgi apparatus|trans-Golgi network|integral component of membrane|transferase activity, transferring glycosyl groups|hydroxyproline O-arabinosyltransferase activity	path:vvi00514	Other types of O-glycan biosynthesis
chr6	17325001	17326000	1	1	299	2	109	0	0.67	0.67	0	VIT_206s0061g00100	VIT_206s0061g00100	328.763	652.375	5.15041	0.00789486	-6.98487	1.52813e-27	6.4331e-24	Down	23.8037	0.178549	LOC100265368	VIT_06s0061g00120	PREDICTED: glucan endo-1,3-beta-glucosidase-like [Vitis vinifera]	GO:0004553,GO:0005975,GO:0006952,GO:0009607,GO:0030247,GO:0042973,GO:0046658	hydrolase activity, hydrolyzing O-glycosyl compounds|carbohydrate metabolic process|defense response|response to biotic stimulus|polysaccharide binding|glucan endo-1,3-beta-D-glucosidase activity|anchored component of plasma membrane
chr6	17351001	17352000	1	1	82	1	10	0	1.22	1.22	0	VIT_206s0061g00120	VIT_206s0061g00120	216.588	311.626	121.55	0.39005	-1.35827	0.00729744	0.345994	Down	11.4903	4.23361	LOC100265368	VIT_06s0061g00120	PREDICTED: glucan endo-1,3-beta-glucosidase [Vitis vinifera]	GO:0004553,GO:0005975,GO:0006952,GO:0009607,GO:0030247,GO:0042973,GO:0046658	hydrolase activity, hydrolyzing O-glycosyl compounds|carbohydrate metabolic process|defense response|response to biotic stimulus|polysaccharide binding|glucan endo-1,3-beta-D-glucosidase activity|anchored component of plasma membrane
chr6	17352001	17353000	1	1	437	1	160	0	0.23	0.23	0	VIT_206s0061g00120	VIT_206s0061g00120	216.588	311.626	121.55	0.39005	-1.35827	0.00729744	0.345994	Down	11.4903	4.23361	LOC100265368	VIT_06s0061g00120	PREDICTED: glucan endo-1,3-beta-glucosidase [Vitis vinifera]	GO:0004553,GO:0005975,GO:0006952,GO:0009607,GO:0030247,GO:0042973,GO:0046658	hydrolase activity, hydrolyzing O-glycosyl compounds|carbohydrate metabolic process|defense response|response to biotic stimulus|polysaccharide binding|glucan endo-1,3-beta-D-glucosidase activity|anchored component of plasma membrane
chr6	17353001	17354000	1	1	1173	3	380	0	0.26	0.26	0	VIT_206s0061g00120	VIT_206s0061g00120	216.588	311.626	121.55	0.39005	-1.35827	0.00729744	0.345994	Down	11.4903	4.23361	LOC100265368	VIT_06s0061g00120	PREDICTED: glucan endo-1,3-beta-glucosidase [Vitis vinifera]	GO:0004553,GO:0005975,GO:0006952,GO:0009607,GO:0030247,GO:0042973,GO:0046658	hydrolase activity, hydrolyzing O-glycosyl compounds|carbohydrate metabolic process|defense response|response to biotic stimulus|polysaccharide binding|glucan endo-1,3-beta-D-glucosidase activity|anchored component of plasma membrane
chr6	17623001	17624000	1	1	30	0	230	1	-0.43	0	0.43	VIT_206s0061g00280	VIT_206s0061g00280	262.786	350.458	175.114	0.499672	-1.00095	0.0316486	0.973193	Down	4.42499	1.91999	LOC100258458	At5g60760 {ECO:0000312|Araport:AT5G60760}; MAE1.1 {ECO:0000312|EMBL:BAB10097.1}	PREDICTED: uncharacterized protein DDB_G0273453/DDB_G0273565-like [Vitis vinifera]	GO:0010264	myo-inositol hexakisphosphate biosynthetic process
chr6	17624001	17625000	0.079	0.377	306	0	231	3	-1.3	0	1.3	VIT_206s0061g00280	VIT_206s0061g00280	262.786	350.458	175.114	0.499672	-1.00095	0.0316486	0.973193	Down	4.42499	1.91999	LOC100258458	At5g60760 {ECO:0000312|Araport:AT5G60760}; MAE1.1 {ECO:0000312|EMBL:BAB10097.1}	PREDICTED: uncharacterized protein DDB_G0273453/DDB_G0273565-like [Vitis vinifera]	GO:0010264	myo-inositol hexakisphosphate biosynthetic process
chr6	17626001	17627000	6.44e-06	0.000311	10	7	30	0	70	70	0	VIT_206s0061g00280	VIT_206s0061g00280	262.786	350.458	175.114	0.499672	-1.00095	0.0316486	0.973193	Down	4.42499	1.91999	LOC100258458	At5g60760 {ECO:0000312|Araport:AT5G60760}; MAE1.1 {ECO:0000312|EMBL:BAB10097.1}	PREDICTED: uncharacterized protein DDB_G0273453/DDB_G0273565-like [Vitis vinifera]	GO:0010264	myo-inositol hexakisphosphate biosynthetic process
chr6	17632001	17633000	1	1	478	5	10	0	1.05	1.05	0	VIT_206s0061g00280	VIT_206s0061g00280	262.786	350.458	175.114	0.499672	-1.00095	0.0316486	0.973193	Down	4.42499	1.91999	LOC100258458	At5g60760 {ECO:0000312|Araport:AT5G60760}; MAE1.1 {ECO:0000312|EMBL:BAB10097.1}	PREDICTED: uncharacterized protein DDB_G0273453/DDB_G0273565-like [Vitis vinifera]	GO:0010264	myo-inositol hexakisphosphate biosynthetic process
chr6	17633001	17634000	1	1	313	1	10	0	0.32	0.32	0	VIT_206s0061g00280	VIT_206s0061g00280	262.786	350.458	175.114	0.499672	-1.00095	0.0316486	0.973193	Down	4.42499	1.91999	LOC100258458	At5g60760 {ECO:0000312|Araport:AT5G60760}; MAE1.1 {ECO:0000312|EMBL:BAB10097.1}	PREDICTED: uncharacterized protein DDB_G0273453/DDB_G0273565-like [Vitis vinifera]	GO:0010264	myo-inositol hexakisphosphate biosynthetic process
chr6	17634001	17635000	1	1	566	4	30	0	0.71	0.71	0	VIT_206s0061g00280	VIT_206s0061g00280	262.786	350.458	175.114	0.499672	-1.00095	0.0316486	0.973193	Down	4.42499	1.91999	LOC100258458	At5g60760 {ECO:0000312|Araport:AT5G60760}; MAE1.1 {ECO:0000312|EMBL:BAB10097.1}	PREDICTED: uncharacterized protein DDB_G0273453/DDB_G0273565-like [Vitis vinifera]	GO:0010264	myo-inositol hexakisphosphate biosynthetic process
chr6	18186001	18187000	1	1	320	6	20	0	1.88	1.88	0	VIT_206s0061g00680	VIT_206s0061g00680	434.795	688.295	181.294	0.263396	-1.92469	1.45818e-06	0.000257927	Down	9.96597	2.55322	LOC100251777		PREDICTED: neural Wiskott-Aldrich syndrome protein-like [Vitis vinifera]
chr6	20235001	20236000	0.107	0.45	424	0	51	1	-1.96	0	1.96	VIT_206s0080g00320	VIT_206s0080g00320	142.444	209.692	75.196	0.358602	-1.47954	0.0135609	0.541965	Down	6.17632	2.05225	LOC100248360		PREDICTED: uncharacterized protein LOC100248360 [Vitis vinifera]
chr7	518001	519000	0.554	1	177	0	359	3	-0.84	0	0.84	VIT_207s0141g00890	VIT_207s0141g00890	123.884	227.166	20.6016	0.0906896	-3.46292	8.60226e-07	0.000160238	Down	5.11361	0.432215	LOC100264774	CYP94A1; Synonyms=VAGH111	PREDICTED: cytochrome P450 94A1 [Vitis vinifera]	GO:0004497,GO:0005506,GO:0005789,GO:0016021,GO:0016705,GO:0020037	monooxygenase activity|iron ion binding|endoplasmic reticulum membrane|integral component of membrane|oxidoreductase activity, acting on paired donors, with incorporation or reduction of molecular oxygen|heme binding	path:vvi00073	Cutin, suberine and wax biosynthesis
chr7	1979001	1980000	0.5	0.99	393	2	372	0	0.51	0.51	0	VIT_207s0104g00830	VIT_207s0104g00830	366.557	494.135	238.979	0.483631	-1.04802	0.0110195	0.462973	Down	15.5728	5.71361	LOC100263109	At2g48020; T9J23.17	PREDICTED: sugar transporter ERD6-like 7 [Vitis vinifera]	GO:0005351,GO:0005355,GO:0005773,GO:0005774,GO:0006829,GO:0009507,GO:0009705,GO:0016021,GO:0035428,GO:0046323	sugar:proton symporter activity|glucose transmembrane transporter activity|vacuole|vacuolar membrane|zinc II ion transport|chloroplast|plant-type vacuole membrane|integral component of membrane|hexose transmembrane transport|glucose import
chr7	1980001	1981000	0.305	0.788	666	1	422	3	-0.56	0.15	0.71	VIT_207s0104g00830	VIT_207s0104g00830	366.557	494.135	238.979	0.483631	-1.04802	0.0110195	0.462973	Down	15.5728	5.71361	LOC100263109	At2g48020; T9J23.17	PREDICTED: sugar transporter ERD6-like 7 [Vitis vinifera]	GO:0005351,GO:0005355,GO:0005773,GO:0005774,GO:0006829,GO:0009507,GO:0009705,GO:0016021,GO:0035428,GO:0046323	sugar:proton symporter activity|glucose transmembrane transporter activity|vacuole|vacuolar membrane|zinc II ion transport|chloroplast|plant-type vacuole membrane|integral component of membrane|hexose transmembrane transport|glucose import
chr7	1981001	1982000	0.0614	0.323	182	6	192	1	2.78	3.3	0.52	VIT_207s0104g00830	VIT_207s0104g00830	366.557	494.135	238.979	0.483631	-1.04802	0.0110195	0.462973	Down	15.5728	5.71361	LOC100263109	At2g48020; T9J23.17	PREDICTED: sugar transporter ERD6-like 7 [Vitis vinifera]	GO:0005351,GO:0005355,GO:0005773,GO:0005774,GO:0006829,GO:0009507,GO:0009705,GO:0016021,GO:0035428,GO:0046323	sugar:proton symporter activity|glucose transmembrane transporter activity|vacuole|vacuolar membrane|zinc II ion transport|chloroplast|plant-type vacuole membrane|integral component of membrane|hexose transmembrane transport|glucose import
chr7	2285001	2286000	0.15	0.544	80	3	133	1	3	3.75	0.75	VIT_207s0104g01260	VIT_207s0104g01260	95.9681	163.094	28.8423	0.176845	-2.49944	0.000632565	0.0522151	Down	6.03348	0.998553	LOC100251223	YUC10; Synonyms=YUCCA10; At1g48910; F27K7.7	PREDICTED: probable indole-3-pyruvate monooxygenase YUCCA10 [Vitis vinifera]	GO:0004499,GO:0009851,GO:0050660,GO:0050661,GO:0103075	N,N-dimethylaniline monooxygenase activity|auxin biosynthetic process|flavin adenine dinucleotide binding|NADP binding|indole-3-pyruvate monooxygenase activity	path:vvi00380	Tryptophan metabolism
chr7	2309001	2310000	0.557	1	243	3	139	0	1.23	1.23	0	VIT_207s0104g01280	VIT_207s0104g01280	171.942	238.816	105.068	0.439955	-1.18457	0.0318094	0.973193	Down	5.39411	2.62039	LOC100261462	NHX2; At3g05030; T9J14.2	sodium/hydrogen exchanger 2-like [Vitis vinifera]	GO:0005774,GO:0005886,GO:0009651,GO:0010107,GO:0015385,GO:0015386,GO:0016021,GO:0051453,GO:0055075,GO:0090333,GO:0098719	vacuolar membrane|plasma membrane|response to salt stress|potassium ion import|sodium:proton antiporter activity|potassium:proton antiporter activity|integral component of membrane|regulation of intracellular pH|potassium ion homeostasis|regulation of stomatal closure|sodium ion import across plasma membrane
chr7	2310001	2311000	1	1	342	2	40	0	0.58	0.58	0	VIT_207s0104g01280	VIT_207s0104g01280	171.942	238.816	105.068	0.439955	-1.18457	0.0318094	0.973193	Down	5.39411	2.62039	LOC100261462	NHX2; At3g05030; T9J14.2	sodium/hydrogen exchanger 2-like [Vitis vinifera]	GO:0005774,GO:0005886,GO:0009651,GO:0010107,GO:0015385,GO:0015386,GO:0016021,GO:0051453,GO:0055075,GO:0090333,GO:0098719	vacuolar membrane|plasma membrane|response to salt stress|potassium ion import|sodium:proton antiporter activity|potassium:proton antiporter activity|integral component of membrane|regulation of intracellular pH|potassium ion homeostasis|regulation of stomatal closure|sodium ion import across plasma membrane
chr7	2312001	2313000	0.32	0.806	146	4	62	0	2.74	2.74	0	VIT_207s0104g01280	VIT_207s0104g01280	171.942	238.816	105.068	0.439955	-1.18457	0.0318094	0.973193	Down	5.39411	2.62039	LOC100261462	NHX2; At3g05030; T9J14.2	sodium/hydrogen exchanger 2-like [Vitis vinifera]	GO:0005774,GO:0005886,GO:0009651,GO:0010107,GO:0015385,GO:0015386,GO:0016021,GO:0051453,GO:0055075,GO:0090333,GO:0098719	vacuolar membrane|plasma membrane|response to salt stress|potassium ion import|sodium:proton antiporter activity|potassium:proton antiporter activity|integral component of membrane|regulation of intracellular pH|potassium ion homeostasis|regulation of stomatal closure|sodium ion import across plasma membrane
chr7	2313001	2314000	0.356	0.844	607	7	150	0	1.15	1.15	0	VIT_207s0104g01280	VIT_207s0104g01280	171.942	238.816	105.068	0.439955	-1.18457	0.0318094	0.973193	Down	5.39411	2.62039	LOC100261462	NHX2; At3g05030; T9J14.2	sodium/hydrogen exchanger 2-like [Vitis vinifera]	GO:0005774,GO:0005886,GO:0009651,GO:0010107,GO:0015385,GO:0015386,GO:0016021,GO:0051453,GO:0055075,GO:0090333,GO:0098719	vacuolar membrane|plasma membrane|response to salt stress|potassium ion import|sodium:proton antiporter activity|potassium:proton antiporter activity|integral component of membrane|regulation of intracellular pH|potassium ion homeostasis|regulation of stomatal closure|sodium ion import across plasma membrane
chr7	2318001	2319000	0.103	0.441	10	2	20	0	20	20	0	VIT_207s0104g01280	VIT_207s0104g01280	171.942	238.816	105.068	0.439955	-1.18457	0.0318094	0.973193	Down	5.39411	2.62039	LOC100261462	NHX2; At3g05030; T9J14.2	sodium/hydrogen exchanger 2-like [Vitis vinifera]	GO:0005774,GO:0005886,GO:0009651,GO:0010107,GO:0015385,GO:0015386,GO:0016021,GO:0051453,GO:0055075,GO:0090333,GO:0098719	vacuolar membrane|plasma membrane|response to salt stress|potassium ion import|sodium:proton antiporter activity|potassium:proton antiporter activity|integral component of membrane|regulation of intracellular pH|potassium ion homeostasis|regulation of stomatal closure|sodium ion import across plasma membrane
chr7	3484001	3485000	0.0024	0.0342	316	10	585	3	2.65	3.16	0.51	VIT_207s0005g00870	VIT_207s0005g00870	48.5584	79.6053	17.5114	0.219978	-2.18457	0.0196238	0.722135	Down	2.93015	0.607128	LOC100257315	EXL2; At5g64260; MSJ1.10	PREDICTED: protein EXORDIUM-like 2 [Vitis vinifera]	GO:0005615,GO:0005618,GO:0005794,GO:0005829,GO:0009505,GO:0009506,GO:0048046	extracellular space|cell wall|Golgi apparatus|cytosol|plant-type cell wall|plasmodesma|apoplast
chr7	3645001	3646000	1	1	739	3	104	0	0.41	0.41	0	VIT_207s0005g01090	VIT_207s0005g01090	7.28097	14.5619	0	0	#NAME?	0.0470467	1	Down	0.268347	0	LOC100854991		PREDICTED: uncharacterized protein LOC100854991 [Vitis vinifera]
chr7	3856001	3857000	0.464	0.957	150	0	130	1	-0.77	0	0.77	VIT_207s0005g01320	VIT_207s0005g01320	64.3282	102.904	25.752	0.250252	-1.99855	0.0162453	0.621268	Down	5.90134	1.31161	LOC100253802		PREDICTED: uncharacterized protein LOC100253802 [Vitis vinifera]
chr7	4490001	4491000	0.102	0.437	206	2	439	0	0.97	0.97	0	VIT_207s0005g02070	VIT_207s0005g02070	427.447	709.652	145.242	0.204666	-2.28866	2.10509e-08	5.60886e-06	Down	30.2721	6.82893	LOC100852938		PREDICTED: protein NIM1-INTERACTING 1 [Vitis vinifera]
chr7	4497001	4498000	1	1	10	0	63	1	-1.59	0	1.59	VIT_207s0005g02080	VIT_207s0005g02080	46.4093	82.5177	10.3008	0.124832	-3.00194	0.00270839	0.166207	Down	3.43855	0.413859			hypothetical protein VITISV_025406 [Vitis vinifera]
chr7	4979001	4980000	1	1	40	0	213	2	-0.94	0	0.94	VIT_207s0005g02660	VIT_207s0005g02660	601.631	858.184	345.077	0.402102	-1.31437	0.000192708	0.0196909	Down	4.96626	2.063	LOC100267452	ABCB11; Synonyms=MDR8, PGP11; At1g02520; T14P4.15	PREDICTED: ABC transporter B family member 11 [Vitis vinifera]	GO:0005524,GO:0005886,GO:0009506,GO:0010329,GO:0010540,GO:0016021,GO:0042626	ATP binding|plasma membrane|plasmodesma|auxin efflux transmembrane transporter activity|basipetal auxin transport|integral component of membrane|ATPase activity, coupled to transmembrane movement of substances	path:vvi02010	ABC transporters
chr7	6210001	6211000	1	1	96	0	187	1	-0.53	0	0.53	VIT_207s0005g03340	VIT_207s0005g03340	67.1628	128.145	6.18049	0.0482304	-4.37391	5.55685e-06	0.000886107	Down	2.26517	0.104186	MYB14	MYB14 {ECO:0000303|PubMed:9839469}; At2g31180 {ECO:0000312|Araport:AT2G31180}; F16D14.2 {ECO:0000312|EMBL:AAD20663.1}	R2R3 Myb14 transcription factor [Vitis vinifera]	GO:0000981,GO:0001135,GO:0003700,GO:0005634,GO:0006351,GO:0006357,GO:0009409,GO:0009651,GO:0009723,GO:0009733,GO:0009751,GO:0009753,GO:0030154,GO:0043565,GO:0044212,GO:0045893,GO:0050826	RNA polymerase II transcription factor activity, sequence-specific DNA binding|transcription factor activity, RNA polymerase II transcription factor recruiting|DNA binding transcription factor activity|nucleus|transcription, DNA-templated|regulation of transcription from RNA polymerase II promoter|response to cold|response to salt stress|response to ethylene|response to auxin|response to salicyli…
chr7	7205001	7206000	0.607	1	155	0	1185	8	-0.68	0	0.68	VIT_207s0005g04110	VIT_207s0005g04110	39.0838	1.94159	76.2261	39.2595	5.29497	4.77964e-05	0.00609737	Up	0.028828	0.957532	LOC100241197	CESA4; Synonyms=IRX5; At5g44030; MRH10.14	PREDICTED: cellulose synthase A catalytic subunit 4 [UDP-forming] [Vitis vinifera]	GO:0005794,GO:0005886,GO:0009833,GO:0009834,GO:0016021,GO:0016759,GO:0016760,GO:0030244,GO:0042742,GO:0046872,GO:0050832,GO:0071555	Golgi apparatus|plasma membrane|plant-type primary cell wall biogenesis|plant-type secondary cell wall biogenesis|integral component of membrane|cellulose synthase activity|cellulose synthase (UDP-forming) activity|cellulose biosynthetic process|defense response to bacterium|metal ion binding|defense response to fungus|cell wall organization
chr7	7208001	7209000	0.326	0.813	207	0	100	1	-1	0	1	VIT_207s0005g04110	VIT_207s0005g04110	39.0838	1.94159	76.2261	39.2595	5.29497	4.77964e-05	0.00609737	Up	0.028828	0.957532	LOC100241197	CESA4; Synonyms=IRX5; At5g44030; MRH10.14	PREDICTED: cellulose synthase A catalytic subunit 4 [UDP-forming] [Vitis vinifera]	GO:0005794,GO:0005886,GO:0009833,GO:0009834,GO:0016021,GO:0016759,GO:0016760,GO:0030244,GO:0042742,GO:0046872,GO:0050832,GO:0071555	Golgi apparatus|plasma membrane|plant-type primary cell wall biogenesis|plant-type secondary cell wall biogenesis|integral component of membrane|cellulose synthase activity|cellulose synthase (UDP-forming) activity|cellulose biosynthetic process|defense response to bacterium|metal ion binding|defense response to fungus|cell wall organization
chr7	7954001	7955000	0.00011	0.00316	213	9	892	4	3.78	4.23	0.45	VIT_207s0005g04710	VIT_207s0005g04710	131.884	184.451	79.3163	0.430012	-1.21755	0.0471347	1	Down	2.07533	0.757277	LOC100265222	ALE2; At2g20300; F11A3.15	PREDICTED: receptor-like serine/threonine-protein kinase ALE2 isoform X1 [Vitis vinifera]
chr7	7955001	7956000	1	1	104	0	395	1	-0.25	0	0.25	VIT_207s0005g04710	VIT_207s0005g04710	131.884	184.451	79.3163	0.430012	-1.21755	0.0471347	1	Down	2.07533	0.757277	LOC100265222	ALE2; At2g20300; F11A3.15	PREDICTED: receptor-like serine/threonine-protein kinase ALE2 isoform X1 [Vitis vinifera]
chr7	7956001	7957000	0.335	0.821	141	1	280	0	0.71	0.71	0	VIT_207s0005g04710	VIT_207s0005g04710	131.884	184.451	79.3163	0.430012	-1.21755	0.0471347	1	Down	2.07533	0.757277	LOC100265222	ALE2; At2g20300; F11A3.15	PREDICTED: receptor-like serine/threonine-protein kinase ALE2 isoform X1 [Vitis vinifera]
chr7	7957001	7958000	0.116	0.472	40	1	627	1	2.34	2.5	0.16	VIT_207s0005g04710	VIT_207s0005g04710	131.884	184.451	79.3163	0.430012	-1.21755	0.0471347	1	Down	2.07533	0.757277	LOC100265222	ALE2; At2g20300; F11A3.15	PREDICTED: receptor-like serine/threonine-protein kinase ALE2 isoform X1 [Vitis vinifera]
chr7	7958001	7959000	1	1	40	0	143	2	-1.4	0	1.4	VIT_207s0005g04710	VIT_207s0005g04710	131.884	184.451	79.3163	0.430012	-1.21755	0.0471347	1	Down	2.07533	0.757277	LOC100265222	ALE2; At2g20300; F11A3.15	PREDICTED: receptor-like serine/threonine-protein kinase ALE2 isoform X1 [Vitis vinifera]
chr7	7971001	7972000	0.0434	0.259	641	4	40	2	-4.38	0.62	5	VIT_207s0005g04710	VIT_207s0005g04710	131.884	184.451	79.3163	0.430012	-1.21755	0.0471347	1	Down	2.07533	0.757277	LOC100265222	ALE2; At2g20300; F11A3.15	PREDICTED: receptor-like serine/threonine-protein kinase ALE2 isoform X1 [Vitis vinifera]
chr7	7973001	7974000	1	1	10	0	454	6	-1.32	0	1.32	VIT_207s0005g04710	VIT_207s0005g04710	131.884	184.451	79.3163	0.430012	-1.21755	0.0471347	1	Down	2.07533	0.757277	LOC100265222	ALE2; At2g20300; F11A3.15	PREDICTED: receptor-like serine/threonine-protein kinase ALE2 isoform X1 [Vitis vinifera]
chr7	7975001	7976000	1	1	118	0	183	1	-0.55	0	0.55	VIT_207s0005g04710	VIT_207s0005g04710	131.884	184.451	79.3163	0.430012	-1.21755	0.0471347	1	Down	2.07533	0.757277	LOC100265222	ALE2; At2g20300; F11A3.15	PREDICTED: receptor-like serine/threonine-protein kinase ALE2 isoform X1 [Vitis vinifera]
chr7	16710001	16711000	1	1	282	1	110	0	0.35	0.35	0	VIT_207s0031g00490	VIT_207s0031g00490	129.249	186.393	72.1057	0.386848	-1.37016	0.0272846	0.885778	Down	0.862704	0.507056	LOC100261036	At5g67130; K21H1.9	PREDICTED: PI-PLC X domain-containing protein At5g67130 [Vitis vinifera]	GO:0005886,GO:0006629,GO:0008081,GO:0046658	plasma membrane|lipid metabolic process|phosphoric diester hydrolase activity|anchored component of plasma membrane
chr7	16711001	16712000	1	1	30	0	30	1	-3.33	0	3.33	VIT_207s0031g00490	VIT_207s0031g00490	129.249	186.393	72.1057	0.386848	-1.37016	0.0272846	0.885778	Down	0.862704	0.507056	LOC100261036	At5g67130; K21H1.9	PREDICTED: PI-PLC X domain-containing protein At5g67130 [Vitis vinifera]	GO:0005886,GO:0006629,GO:0008081,GO:0046658	plasma membrane|lipid metabolic process|phosphoric diester hydrolase activity|anchored component of plasma membrane
chr7	16862001	16863000	0.3	0.783	70	0	30	1	-3.33	0	3.33	VIT_207s0031g00700	VIT_207s0031g00700	158.155	234.933	81.3765	0.346382	-1.52956	0.00791716	0.367877	Down	3.40012	1.09536	LOC100255889	CML13; Os07g0618800, LOC_Os07g42660; P0552F09.133, P0560B08.106	hypothetical protein VITISV_003014 [Vitis vinifera]	GO:0005509	calcium ion binding	path:vvi04626	Plant-pathogen interaction
chr7	16864001	16865000	1	1	141	0	210	1	-0.48	0	0.48	VIT_207s0031g00700	VIT_207s0031g00700	158.155	234.933	81.3765	0.346382	-1.52956	0.00791716	0.367877	Down	3.40012	1.09536	LOC100255889	CML13; Os07g0618800, LOC_Os07g42660; P0552F09.133, P0560B08.106	hypothetical protein VITISV_003014 [Vitis vinifera]	GO:0005509	calcium ion binding	path:vvi04626	Plant-pathogen interaction
chr7	17192001	17193000	1	1	20	0	225	2	-0.89	0	0.89	VIT_207s0031g01040	VIT_207s0031g01040	177.93	312.597	43.2634	0.1384	-2.85308	1.09872e-06	0.000201105	Down	5.67953	0.760199	LOC100252644	AAO	PREDICTED: L-ascorbate oxidase [Vitis vinifera]	GO:0005507,GO:0005576,GO:0008447	copper ion binding|extracellular region|L-ascorbate oxidase activity
chr7	17193001	17194000	0.348	0.836	22	0	100	8	-8	0	8	VIT_207s0031g01040	VIT_207s0031g01040	177.93	312.597	43.2634	0.1384	-2.85308	1.09872e-06	0.000201105	Down	5.67953	0.760199	LOC100252644	AAO	PREDICTED: L-ascorbate oxidase [Vitis vinifera]	GO:0005507,GO:0005576,GO:0008447	copper ion binding|extracellular region|L-ascorbate oxidase activity
chr7	17208001	17209000	2.34e-12	5.11e-10	284	31	546	3	10.37	10.92	0.55	VIT_207s0031g01070	VIT_207s0031g01070	34.9783	68.9266	1.03008	0.0149446	-6.06423	4.94345e-05	0.00612087	Down	1.41439	0.0223956	LOC100263656		unnamed protein product, partial [Vitis vinifera]	GO:0005507,GO:0005576,GO:0008447	copper ion binding|extracellular region|L-ascorbate oxidase activity
chr7	17796001	17797000	0.371	0.858	165	1	280	0	0.61	0.61	0	VIT_207s0031g01710	VIT_207s0031g01710	307.29	529.084	85.4968	0.161594	-2.62955	1.90089e-08	5.12972e-06	Down	15.5348	2.44455	LOC100266268	WRKY51; At5g64810; MXK3.3	PREDICTED: probable WRKY transcription factor 51 [Vitis vinifera]	GO:0003700,GO:0005634,GO:0006351,GO:0009867,GO:0042742,GO:0043565,GO:0050832	DNA binding transcription factor activity|nucleus|transcription, DNA-templated|jasmonic acid mediated signaling pathway|defense response to bacterium|sequence-specific DNA binding|defense response to fungus
chr7	18769001	18770000	1	1	232	3	10	0	1.29	1.29	0	VIT_207s0031g02540	VIT_207s0031g02540	26.8451	48.5398	5.15041	0.106107	-3.23641	0.0110042	0.462973	Down	1.14187	0.121069	LOC100853376		PREDICTED: uncharacterized protein LOC100853376 [Vitis vinifera]
chr7	18930001	18931000	1	1	40	0	131	1	-0.76	0	0.76	VIT_207s0031g02610	VIT_207s0031g02610	674.444	919.344	429.544	0.467229	-1.0978	0.00120167	0.0890629	Down	21.5057	9.3483	LOC100261123	NAC081; Synonyms=ATAF2; At5g08790; T2K12.140	PREDICTED: NAC domain-containing protein 2 [Vitis vinifera]	GO:0003677,GO:0005634,GO:0006351,GO:0008361,GO:0009416,GO:0009611,GO:0009620,GO:0009744,GO:0009751,GO:0009753,GO:0009793,GO:0010099,GO:0010150,GO:0016032,GO:0043424,GO:0045892,GO:0045893	DNA binding|nucleus|transcription, DNA-templated|regulation of cell size|response to light stimulus|response to wounding|response to fungus|response to sucrose|response to salicylic acid|response to jasmonic acid|embryo development ending in seed dormancy|regulation of photomorphogenesis|leaf senescence|viral process|protein histidine kinase binding|negative regulation of transcription, DNA-templ…
chr8	1865001	1866000	0.318	0.803	551	1	116	1	-0.68	0.18	0.86	VIT_208s0056g01190	VIT_208s0056g01190	13.1058	26.2115	0	0	#NAME?	0.00587523	0.301628	Down	0.312656	0	LOC100245102		unnamed protein product, partial [Vitis vinifera]	GO:0000981,GO:0001135,GO:0005634,GO:0006351,GO:0006357,GO:0030154,GO:0043565,GO:0044212	RNA polymerase II transcription factor activity, sequence-specific DNA binding|transcription factor activity, RNA polymerase II transcription factor recruiting|nucleus|transcription, DNA-templated|regulation of transcription from RNA polymerase II promoter|cell differentiation|sequence-specific DNA binding|transcription regulatory region DNA binding
chr8	3761001	3762000	1	1	30	0	212	1	-0.47	0	0.47	VIT_208s0032g00496	VIT_208s0032g00496	525.031	347.545	702.516	2.02137	1.01533	0.00536596	0.279574	Up	2.74669	5.15074	LOC100249668	QKY {ECO:0000303|PubMed:19180193}; At1g74720 {ECO:0000312|Araport:AT1G74720}; F1M20.40 {ECO:0000312|EMBL:AAG52366.1}, F25A4.30 {ECO:0000312|EMBL:AAD55273.1}	PREDICTED: uncharacterized protein LOC100249668 [Vitis vinifera]	GO:0005886,GO:0009506,GO:0016021,GO:0016757,GO:0099402	plasma membrane|plasmodesma|integral component of membrane|transferase activity, transferring glycosyl groups|plant organ development
chr8	7182001	7183000	0.501	0.99	214	2	185	0	0.93	0.93	0	VIT_208s0105g00200	VIT_208s0105g00200	11.6792	22.3283	1.03008	0.0461334	-4.43804	0.032751	0.981515	Down	0.700476	0	LOC100262692	PUB24; At3g11840; F26K24.13	PREDICTED: E3 ubiquitin-protein ligase PUB23 [Vitis vinifera]	GO:0004842,GO:0006952	ubiquitin-protein transferase activity|defense response
chr8	8633001	8634000	0.358	0.846	576	0	321	1	-0.31	0	0.31	VIT_208s0058g00104	VIT_208s0058g00104	47.4986	80.5761	14.4211	0.178975	-2.48217	0.00969548	0.426946	Down	2.77407	0.388332	LOC100247292	RLP30 {ECO:0000303|PubMed:18434605}; At3g05360 {ECO:0000312|Araport:AT3G05360}; T12H1.33 {ECO:0000312|EMBL:AAF27042.1}	PREDICTED: probably inactive leucine-rich repeat receptor-like protein kinase At2g25790 [Vitis vinifera]	GO:0002237,GO:0002238,GO:0002240,GO:0005886,GO:0009620,GO:0010204,GO:0016021,GO:0032491,GO:0050832	response to molecule of bacterial origin|response to molecule of fungal origin|response to molecule of oomycetes origin|plasma membrane|response to fungus|defense response signaling pathway, resistance gene-independent|integral component of membrane|detection of molecule of fungal origin|defense response to fungus
chr8	8786001	8787000	0.375	0.861	30	1	50	0	3.33	3.33	0	VIT_208s0058g00150	VIT_208s0058g00150	17.9894	34.9487	1.03008	0.0294741	-5.08441	0.00501785	0.266047	Down	0.738061	0.0210225	LOC100250641	AMT2; At2g38290; F16M14.22	PREDICTED: ammonium transporter 2-like [Vitis vinifera]	GO:0005886,GO:0009506,GO:0009624,GO:0015398,GO:0015696,GO:0016021	plasma membrane|plasmodesma|response to nematode|high-affinity secondary active ammonium transmembrane transporter activity|ammonium transport|integral component of membrane
chr8	10329001	10330000	0.415	0.905	170	1	240	0	0.59	0.59	0	VIT_208s0058g00970	VIT_208s0058g00970	1087.8	1854.22	321.386	0.173326	-2.52844	8.1706e-16	6.61473e-13	Down	31.3886	5.06731	LOC100263665	PNC1	PREDICTED: cationic peroxidase 1-like [Vitis vinifera]	GO:0004601,GO:0005576,GO:0006979,GO:0020037,GO:0042744,GO:0046872	peroxidase activity|extracellular region|response to oxidative stress|heme binding|hydrogen peroxide catabolic process|metal ion binding	path:vvi00940	Phenylpropanoid biosynthesis
chr8	10330001	10331000	0.565	1	110	3	40	0	2.73	2.73	0	VIT_208s0058g00970	VIT_208s0058g00970	1087.8	1854.22	321.386	0.173326	-2.52844	8.1706e-16	6.61473e-13	Down	31.3886	5.06731	LOC100263665	PNC1	PREDICTED: cationic peroxidase 1-like [Vitis vinifera]	GO:0004601,GO:0005576,GO:0006979,GO:0020037,GO:0042744,GO:0046872	peroxidase activity|extracellular region|response to oxidative stress|heme binding|hydrogen peroxide catabolic process|metal ion binding	path:vvi00940	Phenylpropanoid biosynthesis
chr8	10339001	10340000	0.338	0.825	70	1	137	0	1.43	1.43	0	VIT_208s0058g00970	VIT_208s0058g00970	1087.8	1854.22	321.386	0.173326	-2.52844	8.1706e-16	6.61473e-13	Down	31.3886	5.06731	LOC100263665	PNC1	PREDICTED: cationic peroxidase 1-like [Vitis vinifera]	GO:0004601,GO:0005576,GO:0006979,GO:0020037,GO:0042744,GO:0046872	peroxidase activity|extracellular region|response to oxidative stress|heme binding|hydrogen peroxide catabolic process|metal ion binding	path:vvi00940	Phenylpropanoid biosynthesis
chr8	10843001	10844000	0.132	0.507	77	2	134	0	2.6	2.6	0	VIT_208s0058g01390	VIT_208s0058g01390	387.759	710.623	64.8952	0.0913215	-3.4529	2.02097e-14	1.57553e-11	Down	18.2451	1.57109	LOC100255013	WRKY70; At3g56400; T5P19.50	unnamed protein product, partial [Vitis vinifera]	GO:0003700,GO:0005634,GO:0006351,GO:0009751,GO:0009753,GO:0009862,GO:0009864,GO:0010200,GO:0031347,GO:0042742,GO:0043565,GO:0045892,GO:0050832,GO:1900056	DNA binding transcription factor activity|nucleus|transcription, DNA-templated|response to salicylic acid|response to jasmonic acid|systemic acquired resistance, salicylic acid mediated signaling pathway|induced systemic resistance, jasmonic acid mediated signaling pathway|response to chitin|regulation of defense response|defense response to bacterium|sequence-specific DNA binding|negative regula…
chr8	10845001	10846000	0.000802	0.015	401	0	336	9	-2.68	0	2.68	VIT_208s0058g01390	VIT_208s0058g01390	387.759	710.623	64.8952	0.0913215	-3.4529	2.02097e-14	1.57553e-11	Down	18.2451	1.57109	LOC100255013	WRKY70; At3g56400; T5P19.50	unnamed protein product, partial [Vitis vinifera]	GO:0003700,GO:0005634,GO:0006351,GO:0009751,GO:0009753,GO:0009862,GO:0009864,GO:0010200,GO:0031347,GO:0042742,GO:0043565,GO:0045892,GO:0050832,GO:1900056	DNA binding transcription factor activity|nucleus|transcription, DNA-templated|response to salicylic acid|response to jasmonic acid|systemic acquired resistance, salicylic acid mediated signaling pathway|induced systemic resistance, jasmonic acid mediated signaling pathway|response to chitin|regulation of defense response|defense response to bacterium|sequence-specific DNA binding|negative regula…
chr8	10846001	10847000	0.0326	0.215	370	3	132	5	-2.98	0.81	3.79	VIT_208s0058g01390	VIT_208s0058g01390	387.759	710.623	64.8952	0.0913215	-3.4529	2.02097e-14	1.57553e-11	Down	18.2451	1.57109	LOC100255013	WRKY70; At3g56400; T5P19.50	unnamed protein product, partial [Vitis vinifera]	GO:0003700,GO:0005634,GO:0006351,GO:0009751,GO:0009753,GO:0009862,GO:0009864,GO:0010200,GO:0031347,GO:0042742,GO:0043565,GO:0045892,GO:0050832,GO:1900056	DNA binding transcription factor activity|nucleus|transcription, DNA-templated|response to salicylic acid|response to jasmonic acid|systemic acquired resistance, salicylic acid mediated signaling pathway|induced systemic resistance, jasmonic acid mediated signaling pathway|response to chitin|regulation of defense response|defense response to bacterium|sequence-specific DNA binding|negative regula…
chr8	11757001	11758000	0.328	0.816	180	0	443	5	-1.13	0	1.13	VIT_208s0040g00800	VIT_208s0040g00800	86.4602	35.9195	137.001	3.81411	1.93135	0.00889495	0.403513	Up	0.566772	2.28843	LOC100241372	At5g07050; MOJ9.22	PREDICTED: WAT1-related protein At5g07050 [Vitis vinifera]	GO:0005886,GO:0016021,GO:0022857	plasma membrane|integral component of membrane|transmembrane transporter activity
chr8	12153001	12154000	1	1	168	1	112	0	0.6	0.6	0	VIT_208s0040g01140	VIT_208s0040g01140	92.7481	150.473	35.0228	0.232751	-2.10314	0.00377083	0.214519	Down	3.6284	0.769268	LOC100260104	SCPL45; At1g28110; F13K9.20	PREDICTED: serine carboxypeptidase-like 45 [Vitis vinifera]	GO:0004185,GO:0005576,GO:0009505,GO:0009506,GO:0051603	serine-type carboxypeptidase activity|extracellular region|plant-type cell wall|plasmodesma|proteolysis involved in cellular protein catabolic process
chr8	13285001	13286000	1	1	608	3	201	0	0.49	0.49	0	VIT_208s0040g02170	VIT_208s0040g02170	49.2624	90.2841	8.24066	0.0912747	-3.45364	0.000628989	0.0521244	Down	1.13186	0.129222	MLO11	MLO6; At1g61560; T25B24.9	MLO11 protein [Vitis vinifera]	GO:0005516,GO:0005886,GO:0009817,GO:0016021	calmodulin binding|plasma membrane|defense response to fungus, incompatible interaction|integral component of membrane
chr8	13644001	13645000	1	1	70	1	50	0	1.43	1.43	0	VIT_208s0040g02600	VIT_208s0040g02600	57.9588	92.2257	23.6919	0.25689	-1.96078	0.0233128	0.809754	Down	1.8296	0.400754	LOC100255195	At2g39490; F12L6.15	hypothetical protein VITISV_021358 [Vitis vinifera]
chr8	13772001	13773000	0.00918	0.0902	50	3	185	0	6	6	0	VIT_208s0040g02730	VIT_208s0040g02730	45.0124	77.6637	12.361	0.15916	-2.65145	0.00741524	0.348623	Down	1.53699	0.235087	LOC100267121		PREDICTED: exocyst complex component EXO70B1-like [Vitis vinifera]	GO:0000145,GO:0002237,GO:0005634,GO:0005829,GO:0006887,GO:0006952,GO:0009617,GO:0009620,GO:0012505,GO:0016020,GO:0031982,GO:0045335,GO:1900426	exocyst|response to molecule of bacterial origin|nucleus|cytosol|exocytosis|defense response|response to bacterium|response to fungus|endomembrane system|membrane|vesicle|phagocytic vesicle|positive regulation of defense response to bacterium
chr8	14401001	14402000	1	1	147	1	80	0	0.68	0.68	0	VIT_208s0007g00020	VIT_208s0007g00020	40.4215	8.73717	72.1057	8.25276	3.04488	0.00392789	0.221064	Up	0.111171	0.716738	LOC100246026	CHX20; At3g53720; F5K20_20	PREDICTED: cation/H(+) antiporter 20 [Vitis vinifera]	GO:0005783,GO:0006623,GO:0006813,GO:0006885,GO:0012505,GO:0015299,GO:0015672,GO:0016021,GO:0030007,GO:0030104	endoplasmic reticulum|protein targeting to vacuole|potassium ion transport|regulation of pH|endomembrane system|solute:proton antiporter activity|monovalent inorganic cation transport|integral component of membrane|cellular potassium ion homeostasis|water homeostasis
chr8	14416001	14417000	1	1	664	3	20	0	0.45	0.45	0	VIT_208s0007g00030	VIT_208s0007g00030	32.0956	62.131	2.06016	0.0331584	-4.91448	0.000349144	0.0315413	Down	0.640608	0.0237495	LOC100264818	CHX20; At3g53720; F5K20_20	PREDICTED: cation/H(+) antiporter 20 [Vitis vinifera]	GO:0005783,GO:0006623,GO:0006813,GO:0006885,GO:0012505,GO:0015299,GO:0015672,GO:0016021,GO:0030007,GO:0030104	endoplasmic reticulum|protein targeting to vacuole|potassium ion transport|regulation of pH|endomembrane system|solute:proton antiporter activity|monovalent inorganic cation transport|integral component of membrane|cellular potassium ion homeostasis|water homeostasis
chr8	14418001	14419000	0.000198	0.00505	508	20	365	1	3.66	3.94	0.27	VIT_208s0007g00030	VIT_208s0007g00030	32.0956	62.131	2.06016	0.0331584	-4.91448	0.000349144	0.0315413	Down	0.640608	0.0237495	LOC100264818	CHX20; At3g53720; F5K20_20	PREDICTED: cation/H(+) antiporter 20 [Vitis vinifera]	GO:0005783,GO:0006623,GO:0006813,GO:0006885,GO:0012505,GO:0015299,GO:0015672,GO:0016021,GO:0030007,GO:0030104	endoplasmic reticulum|protein targeting to vacuole|potassium ion transport|regulation of pH|endomembrane system|solute:proton antiporter activity|monovalent inorganic cation transport|integral component of membrane|cellular potassium ion homeostasis|water homeostasis
chr8	14419001	14420000	1	1	50	0	497	2	-0.4	0	0.4	VIT_208s0007g00030	VIT_208s0007g00030	32.0956	62.131	2.06016	0.0331584	-4.91448	0.000349144	0.0315413	Down	0.640608	0.0237495	LOC100264818	CHX20; At3g53720; F5K20_20	PREDICTED: cation/H(+) antiporter 20 [Vitis vinifera]	GO:0005783,GO:0006623,GO:0006813,GO:0006885,GO:0012505,GO:0015299,GO:0015672,GO:0016021,GO:0030007,GO:0030104	endoplasmic reticulum|protein targeting to vacuole|potassium ion transport|regulation of pH|endomembrane system|solute:proton antiporter activity|monovalent inorganic cation transport|integral component of membrane|cellular potassium ion homeostasis|water homeostasis
chr8	14421001	14422000	0.4	0.888	20	1	30	0	5	5	0	VIT_208s0007g00030	VIT_208s0007g00030	32.0956	62.131	2.06016	0.0331584	-4.91448	0.000349144	0.0315413	Down	0.640608	0.0237495	LOC100264818	CHX20; At3g53720; F5K20_20	PREDICTED: cation/H(+) antiporter 20 [Vitis vinifera]	GO:0005783,GO:0006623,GO:0006813,GO:0006885,GO:0012505,GO:0015299,GO:0015672,GO:0016021,GO:0030007,GO:0030104	endoplasmic reticulum|protein targeting to vacuole|potassium ion transport|regulation of pH|endomembrane system|solute:proton antiporter activity|monovalent inorganic cation transport|integral component of membrane|cellular potassium ion homeostasis|water homeostasis
chr8	14727001	14728000	1	1	50	0	218	2	-0.92	0	0.92	VIT_208s0007g00430	VIT_208s0007g00430	25.2407	50.4814	0	0	#NAME?	0.000131104	0.0142985	Down	0.646109	0	LOC100263049	ERG1; Os01g0841700, LOC_Os01g62430; OsJ_04036 {ECO:0000312|EMBL:EEE55652.1}, P0406G08	PREDICTED: elicitor-responsive protein 1-like isoform X2 [Vitis vinifera]	GO:0005544,GO:0005737,GO:0005886,GO:0006952	calcium-dependent phospholipid binding|cytoplasm|plasma membrane|defense response
chr8	14728001	14729000	0.0997	0.432	163	1	40	2	-4.39	0.61	5	VIT_208s0007g00430	VIT_208s0007g00430	25.2407	50.4814	0	0	#NAME?	0.000131104	0.0142985	Down	0.646109	0	LOC100263049	ERG1; Os01g0841700, LOC_Os01g62430; OsJ_04036 {ECO:0000312|EMBL:EEE55652.1}, P0406G08	PREDICTED: elicitor-responsive protein 1-like isoform X2 [Vitis vinifera]	GO:0005544,GO:0005737,GO:0005886,GO:0006952	calcium-dependent phospholipid binding|cytoplasm|plasma membrane|defense response
chr8	14730001	14731000	0.303	0.786	60	1	138	0	1.67	1.67	0	VIT_208s0007g00430	VIT_208s0007g00430	25.2407	50.4814	0	0	#NAME?	0.000131104	0.0142985	Down	0.646109	0	LOC100263049	ERG1; Os01g0841700, LOC_Os01g62430; OsJ_04036 {ECO:0000312|EMBL:EEE55652.1}, P0406G08	PREDICTED: elicitor-responsive protein 1-like isoform X2 [Vitis vinifera]	GO:0005544,GO:0005737,GO:0005886,GO:0006952	calcium-dependent phospholipid binding|cytoplasm|plasma membrane|defense response
chr8	14904001	14905000	0.567	1	168	0	453	3	-0.66	0	0.66	VIT_208s0007g00690	VIT_208s0007g00690	15.9366	0.970797	30.9025	31.8321	4.99241	0.00787555	0.367567	Up	0.0257909	0.645865	LOC100256283	LAC17; At5g60020; MMN10.27	PREDICTED: laccase-17 [Vitis vinifera]	GO:0005507,GO:0009698,GO:0009809,GO:0016491,GO:0016722,GO:0046274,GO:0048046,GO:0052716	copper ion binding|phenylpropanoid metabolic process|lignin biosynthetic process|oxidoreductase activity|oxidoreductase activity, oxidizing metal ions|lignin catabolic process|apoplast|hydroquinone:oxygen oxidoreductase activity
chr8	14905001	14906000	1	1	170	0	234	1	-0.43	0	0.43	VIT_208s0007g00690	VIT_208s0007g00690	15.9366	0.970797	30.9025	31.8321	4.99241	0.00787555	0.367567	Up	0.0257909	0.645865	LOC100256283	LAC17; At5g60020; MMN10.27	PREDICTED: laccase-17 [Vitis vinifera]	GO:0005507,GO:0009698,GO:0009809,GO:0016491,GO:0016722,GO:0046274,GO:0048046,GO:0052716	copper ion binding|phenylpropanoid metabolic process|lignin biosynthetic process|oxidoreductase activity|oxidoreductase activity, oxidizing metal ions|lignin catabolic process|apoplast|hydroquinone:oxygen oxidoreductase activity
chr8	16431001	16432000	0.327	0.815	150	1	686	1	0.52	0.67	0.15	VIT_208s0007g02360	VIT_208s0007g02360	1535.41	2763.86	306.964	0.111064	-3.17054	6.18563e-26	1.64414e-22	Down	162.164	17.7223	LOC100247789	NHL10 {ECO:0000303|PubMed:14666423}; Synonyms=YLS9 {ECO:0000303|PubMed:11230571}; At2g35980; F11F19.11	PREDICTED: protein YLS9 [Vitis vinifera]	GO:0004871,GO:0009506,GO:0009507,GO:0010150,GO:0016021,GO:0046658,GO:0051607,GO:0051707	signal transducer activity|plasmodesma|chloroplast|leaf senescence|integral component of membrane|anchored component of plasma membrane|defense response to virus|response to other organism
chr8	17020001	17021000	1	1	302	2	58	0	0.66	0.66	0	VIT_208s0007g02940	VIT_208s0007g02940	8.25177	16.5035	0	0	#NAME?	0.0327809	0.981515	Down	0.443258	0	LOC100249478	NAC090; At5g22380; MWD9.18	hypothetical protein VITISV_027899 [Vitis vinifera]	GO:0003677,GO:0003700,GO:0005634,GO:0006351	DNA binding|DNA binding transcription factor activity|nucleus|transcription, DNA-templated
chr8	17021001	17022000	0.331	0.818	174	0	469	5	-1.07	0	1.07	VIT_208s0007g02940	VIT_208s0007g02940	8.25177	16.5035	0	0	#NAME?	0.0327809	0.981515	Down	0.443258	0	LOC100249478	NAC090; At5g22380; MWD9.18	hypothetical protein VITISV_027899 [Vitis vinifera]	GO:0003677,GO:0003700,GO:0005634,GO:0006351	DNA binding|DNA binding transcription factor activity|nucleus|transcription, DNA-templated
chr8	17158001	17159000	0.033	0.216	80	2	358	0	2.5	2.5	0	VIT_208s0007g03140	VIT_208s0007g03140	44.6307	5.82478	83.4366	14.3244	3.84041	0.00036655	0.032832	Up	0.0719902	0.969691	LOC100258031	ROPGAP1; At5g22400; MWD9.20	hypothetical protein VITISV_014711 [Vitis vinifera]	GO:0005096,GO:0007165	GTPase activator activity|signal transduction
chr8	17160001	17161000	1	1	297	1	80	0	0.34	0.34	0	VIT_208s0007g03140	VIT_208s0007g03140	44.6307	5.82478	83.4366	14.3244	3.84041	0.00036655	0.032832	Up	0.0719902	0.969691	LOC100258031	ROPGAP1; At5g22400; MWD9.20	hypothetical protein VITISV_014711 [Vitis vinifera]	GO:0005096,GO:0007165	GTPase activator activity|signal transduction
chr8	17165001	17166000	1	1	217	3	10	0	1.38	1.38	0	VIT_208s0007g03140	VIT_208s0007g03140	44.6307	5.82478	83.4366	14.3244	3.84041	0.00036655	0.032832	Up	0.0719902	0.969691	LOC100258031	ROPGAP1; At5g22400; MWD9.20	hypothetical protein VITISV_014711 [Vitis vinifera]	GO:0005096,GO:0007165	GTPase activator activity|signal transduction
chr8	19705001	19706000	0.0685	0.345	10	1	136	0	10	10	0	VIT_208s0007g05790	VIT_208s0007g05790	875.936	1219.32	532.552	0.436762	-1.19508	0.000158977	0.0166483	Down	46.7771	18.2217	LOC100264151	CML35; At2g41410; F13H10.4	PREDICTED: probable calcium-binding protein CML35 [Vitis vinifera]	GO:0005509,GO:0005886	calcium ion binding|plasma membrane	path:vvi04626	Plant-pathogen interaction
chr8	19707001	19708000	1	1	220	0	481	1	-0.21	0	0.21	VIT_208s0007g05790	VIT_208s0007g05790	875.936	1219.32	532.552	0.436762	-1.19508	0.000158977	0.0166483	Down	46.7771	18.2217	LOC100264151	CML35; At2g41410; F13H10.4	PREDICTED: probable calcium-binding protein CML35 [Vitis vinifera]	GO:0005509,GO:0005886	calcium ion binding|plasma membrane	path:vvi04626	Plant-pathogen interaction
chr8	20317001	20318000	0.117	0.473	789	0	755	3	-0.4	0	0.4	VIT_208s0007g06610	VIT_208s0007g06610	9.22257	18.4451	0	0	#NAME?	0.0229701	0.801819	Down	0.348352	0	LOC100264008	LECRKS5; At5g06740; MPH15.10	PREDICTED: probable L-type lectin-domain containing receptor kinase S.5 [Vitis vinifera]
chr8	20320001	20321000	1	1	102	1	80	0	0.98	0.98	0	VIT_208s0007g06610	VIT_208s0007g06610	9.22257	18.4451	0	0	#NAME?	0.0229701	0.801819	Down	0.348352	0	LOC100264008	LECRKS5; At5g06740; MPH15.10	PREDICTED: probable L-type lectin-domain containing receptor kinase S.5 [Vitis vinifera]
chr8	20511001	20512000	1	1	80	0	225	1	-0.44	0	0.44	VIT_208s0007g06850	VIT_208s0007g06850	36.7902	60.1894	13.3911	0.222482	-2.16824	0.0378925	1	Down	0.842388	0.842036	LOC100853499		PREDICTED: uncharacterized protein LOC100853499 [Vitis vinifera]
chr8	20512001	20513000	0.57	1	52	4	20	0	7.69	7.69	0	VIT_208s0007g06850	VIT_208s0007g06850	36.7902	60.1894	13.3911	0.222482	-2.16824	0.0378925	1	Down	0.842388	0.842036	LOC100853499		PREDICTED: uncharacterized protein LOC100853499 [Vitis vinifera]
chr8	20968001	20969000	0.351	0.839	141	1	261	0	0.71	0.71	0	VIT_208s0007g07440	VIT_208s0007g07440	183.636	328.129	39.1431	0.119292	-3.06743	1.64064e-07	3.59727e-05	Down	4.65088	0.57981	LOC100250413	APUM12; At5g56510; MKN22.2	PREDICTED: uncharacterized protein LOC100250413 [Vitis vinifera]	GO:0003723,GO:0005634,GO:0005737,GO:0006417	RNA binding|nucleus|cytoplasm|regulation of translation
chr8	20969001	20970000	1	1	80	0	146	1	-0.68	0	0.68	VIT_208s0007g07440	VIT_208s0007g07440	183.636	328.129	39.1431	0.119292	-3.06743	1.64064e-07	3.59727e-05	Down	4.65088	0.57981	LOC100250413	APUM12; At5g56510; MKN22.2	PREDICTED: uncharacterized protein LOC100250413 [Vitis vinifera]	GO:0003723,GO:0005634,GO:0005737,GO:0006417	RNA binding|nucleus|cytoplasm|regulation of translation
chr8	20970001	20971000	1	1	352	2	71	0	0.57	0.57	0	VIT_208s0007g07440	VIT_208s0007g07440	183.636	328.129	39.1431	0.119292	-3.06743	1.64064e-07	3.59727e-05	Down	4.65088	0.57981	LOC100250413	APUM12; At5g56510; MKN22.2	PREDICTED: uncharacterized protein LOC100250413 [Vitis vinifera]	GO:0003723,GO:0005634,GO:0005737,GO:0006417	RNA binding|nucleus|cytoplasm|regulation of translation
chr8	20971001	20972000	1	1	89	1	10	0	1.12	1.12	0	VIT_208s0007g07440	VIT_208s0007g07440	183.636	328.129	39.1431	0.119292	-3.06743	1.64064e-07	3.59727e-05	Down	4.65088	0.57981	LOC100250413	APUM12; At5g56510; MKN22.2	PREDICTED: uncharacterized protein LOC100250413 [Vitis vinifera]	GO:0003723,GO:0005634,GO:0005737,GO:0006417	RNA binding|nucleus|cytoplasm|regulation of translation
chr8	21333001	21334000	1	1	10	0	425	5	-1.18	0	1.18	VIT_208s0007g07920	VIT_208s0007g07920	148.239	222.312	74.1659	0.333611	-1.58376	0.00746713	0.350057	Down	2.82952	0.880324	LOC100253823		PREDICTED: uncharacterized protein LOC100253823 [Vitis vinifera]
chr8	21335001	21336000	1	1	633	1	182	0	0.16	0.16	0	VIT_208s0007g07920	VIT_208s0007g07920	148.239	222.312	74.1659	0.333611	-1.58376	0.00746713	0.350057	Down	2.82952	0.880324	LOC100253823		PREDICTED: uncharacterized protein LOC100253823 [Vitis vinifera]
chr8	21336001	21337000	1	1	94	0	337	2	-0.59	0	0.59	VIT_208s0007g07920	VIT_208s0007g07920	148.239	222.312	74.1659	0.333611	-1.58376	0.00746713	0.350057	Down	2.82952	0.880324	LOC100253823		PREDICTED: uncharacterized protein LOC100253823 [Vitis vinifera]
chr8	21337001	21338000	1	1	70	0	1348	8	-0.59	0	0.59	VIT_208s0007g07920	VIT_208s0007g07920	148.239	222.312	74.1659	0.333611	-1.58376	0.00746713	0.350057	Down	2.82952	0.880324	LOC100253823		PREDICTED: uncharacterized protein LOC100253823 [Vitis vinifera]
chr8	21383001	21384000	0.605	1	137	9	20	0	6.57	6.57	0	VIT_208s0007g08000	VIT_208s0007g08000	190.925	308.713	73.1358	0.236905	-2.07762	0.00014383	0.0154463	Down	72.9677	16.0957			unnamed protein product, partial [Vitis vinifera]
chr8	21384001	21385000	0.17	0.583	308	1	30	1	-3.01	0.32	3.33	VIT_208s0007g08000	VIT_208s0007g08000	190.925	308.713	73.1358	0.236905	-2.07762	0.00014383	0.0154463	Down	72.9677	16.0957			unnamed protein product, partial [Vitis vinifera]
chr8	21385001	21386000	1	1	10	0	70	1	-1.43	0	1.43	VIT_208s0007g08000	VIT_208s0007g08000	190.925	308.713	73.1358	0.236905	-2.07762	0.00014383	0.0154463	Down	72.9677	16.0957			unnamed protein product, partial [Vitis vinifera]
chr8	21822001	21823000	0.547	1	181	0	343	2	-0.58	0	0.58	VIT_208s0007g08460	VIT_208s0007g08460	9.70797	19.4159	0	0	#NAME?	0.0192695	0.712441	Down	0.470604	0	LOC100257236		PREDICTED: uncharacterized protein LOC100257236 [Vitis vinifera]
chr8	21823001	21824000	0.166	0.576	802	0	160	1	-0.62	0	0.62	VIT_208s0007g08460	VIT_208s0007g08460	9.70797	19.4159	0	0	#NAME?	0.0192695	0.712441	Down	0.470604	0	LOC100257236		PREDICTED: uncharacterized protein LOC100257236 [Vitis vinifera]
chr8	21824001	21825000	0.123	0.489	176	0	185	4	-2.16	0	2.16	VIT_208s0007g08460	VIT_208s0007g08460	9.70797	19.4159	0	0	#NAME?	0.0192695	0.712441	Down	0.470604	0	LOC100257236		PREDICTED: uncharacterized protein LOC100257236 [Vitis vinifera]
chr9	402001	403000	0.0449	0.265	126	2	467	0	1.59	1.59	0	VIT_209s0002g00580	VIT_209s0002g00580	162.645	20.3867	304.904	14.956	3.90265	1.79324e-09	5.80708e-07	Up	0.583216	8.0747	LOC100259984	GLIP1 {ECO:0000303|PubMed:16126835}; At5g40990 {ECO:0000312|Araport:AT5G40990}; MEE6.6 {ECO:0000312|EMBL:BAB09701.1}	PREDICTED: GDSL esterase/lipase 1 isoform X1 [Vitis vinifera]	GO:0005615,GO:0005622,GO:0009620,GO:0009627,GO:0009751,GO:0009817,GO:0009866,GO:0009871,GO:0016042,GO:0016298,GO:0042742,GO:0050832	extracellular space|intracellular|response to fungus|systemic acquired resistance|response to salicylic acid|defense response to fungus, incompatible interaction|induced systemic resistance, ethylene mediated signaling pathway|jasmonic acid and ethylene-dependent systemic resistance, ethylene mediated signaling pathway|lipid catabolic process|lipase activity|defense response to bacterium|defense …
chr9	1101001	1102000	0.333	0.819	20	0	10	1	-10	0	10	VIT_209s0002g01320	VIT_209s0002g01320	25.9633	43.6858	8.24066	0.188634	-2.40634	0.0485583	1	Down	2.40124	0.478244	LOC100259980		PREDICTED: germin-like protein [Vitis vinifera]	GO:0030145,GO:0031640,GO:0045735,GO:0048046,GO:0050829,GO:0050830,GO:0050832	manganese ion binding|killing of cells of other organism|nutrient reservoir activity|apoplast|defense response to Gram-negative bacterium|defense response to Gram-positive bacterium|defense response to fungus
chr9	1387001	1388000	0.263	0.729	226	3	171	0	1.33	1.33	0	VIT_209s0002g01590	VIT_209s0002g01590	185.593	264.057	107.129	0.405703	-1.30151	0.0153628	0.599948	Down	6.1593	2.45802	LOC100249800	NFYA3; Synonyms=HAP2C; At1g72830; F28P22.32, F3N23.3	PREDICTED: nuclear transcription factor Y subunit A-3 isoform X1 [Vitis vinifera]	GO:0003677,GO:0003700,GO:0006351,GO:0016602	DNA binding|DNA binding transcription factor activity|transcription, DNA-templated|CCAAT-binding factor complex
chr9	1388001	1389000	0.108	0.453	194	0	448	7	-1.56	0	1.56	VIT_209s0002g01590	VIT_209s0002g01590	185.593	264.057	107.129	0.405703	-1.30151	0.0153628	0.599948	Down	6.1593	2.45802	LOC100249800	NFYA3; Synonyms=HAP2C; At1g72830; F28P22.32, F3N23.3	PREDICTED: nuclear transcription factor Y subunit A-3 isoform X1 [Vitis vinifera]	GO:0003677,GO:0003700,GO:0006351,GO:0016602	DNA binding|DNA binding transcription factor activity|transcription, DNA-templated|CCAAT-binding factor complex
chr9	1389001	1390000	1	1	102	0	637	6	-0.94	0	0.94	VIT_209s0002g01590	VIT_209s0002g01590	185.593	264.057	107.129	0.405703	-1.30151	0.0153628	0.599948	Down	6.1593	2.45802	LOC100249800	NFYA3; Synonyms=HAP2C; At1g72830; F28P22.32, F3N23.3	PREDICTED: nuclear transcription factor Y subunit A-3 isoform X1 [Vitis vinifera]	GO:0003677,GO:0003700,GO:0006351,GO:0016602	DNA binding|DNA binding transcription factor activity|transcription, DNA-templated|CCAAT-binding factor complex
chr9	2136001	2137000	0.0599	0.318	384	0	125	2	-1.6	0	1.6	VIT_209s0002g02320	VIT_209s0002g02320	126.737	234.933	18.5415	0.0789225	-3.66342	2.23812e-07	4.80717e-05	Down	2.33951	0.173447	CWINV	CWINV1; Synonyms=BFRUCT1; At3g13790; MMM17.26	unnamed protein product, partial [Vitis vinifera]	GO:0004564,GO:0004575,GO:0005618,GO:0005886,GO:0005975,GO:0009611,GO:0048046,GO:0050832,GO:0080167	beta-fructofuranosidase activity|sucrose alpha-glucosidase activity|cell wall|plasma membrane|carbohydrate metabolic process|response to wounding|apoplast|defense response to fungus|response to karrikin	path:vvi00052,path:vvi00500	Galactose metabolism|Starch and sucrose metabolism
chr9	2258001	2259000	0.498	0.99	80	2	72	0	2.5	2.5	0	VIT_209s0002g02480	VIT_209s0002g02480	194.745	267.94	121.55	0.453645	-1.14036	0.0297812	0.934223	Down	8.73552	3.99156	LOC100260060		PREDICTED: uncharacterized protein LOC100260060 [Vitis vinifera]			path:vvi00190	Oxidative phosphorylation
chr9	2262001	2263000	0.501	0.99	153	2	131	0	1.31	1.31	0	VIT_209s0002g02480	VIT_209s0002g02480	194.745	267.94	121.55	0.453645	-1.14036	0.0297812	0.934223	Down	8.73552	3.99156	LOC100260060		PREDICTED: uncharacterized protein LOC100260060 [Vitis vinifera]			path:vvi00190	Oxidative phosphorylation
chr9	2264001	2265000	0.217	0.664	90	1	1062	2	0.92	1.11	0.19	VIT_209s0002g02480	VIT_209s0002g02480	194.745	267.94	121.55	0.453645	-1.14036	0.0297812	0.934223	Down	8.73552	3.99156	LOC100260060		PREDICTED: uncharacterized protein LOC100260060 [Vitis vinifera]			path:vvi00190	Oxidative phosphorylation
chr9	2662001	2663000	0.0684	0.345	20	2	103	1	9.03	10	0.97	VIT_209s0002g02940	VIT_209s0002g02940	1097.29	683.441	1511.13	2.21106	1.14474	0.000120044	0.0135123	Up	24.4571	50.972	LOC100233007	MIOX1; At1g14520; F14L17.30, T5E21.2, T5E21_19	PREDICTED: inositol oxygenase 1 [Vitis vinifera]	GO:0005506,GO:0005737,GO:0019310,GO:0019853,GO:0050113	iron ion binding|cytoplasm|inositol catabolic process|L-ascorbic acid biosynthetic process|inositol oxygenase activity	path:vvi00053,path:vvi00562	Ascorbate and aldarate metabolism|Inositol phosphate metabolism
chr9	2678001	2679000	1	1	130	1	124	0	0.77	0.77	0	VIT_209s0002g02970	VIT_209s0002g02970	44.3195	83.4885	5.15041	0.06169	-4.01882	0.000272369	0.0254804	Down	16.4216	0.789785	LOC100248142		hypothetical protein VITISV_044245 [Vitis vinifera]
chr9	2721001	2722000	0.000812	0.0151	190	2	20	4	-18.95	1.05	20	VIT_209s0002g03010	VIT_209s0002g03010	11.6792	22.3283	1.03008	0.0461334	-4.43804	0.032751	0.981515	Down	0.321154	0	LOC100266874	At2g19230; F27F23.3	unnamed protein product, partial [Vitis vinifera]
chr9	3627001	3628000	1	1	150	0	485	1	-0.21	0	0.21	VIT_209s0002g03910	VIT_209s0002g03910	12.135	24.2699	0	0	#NAME?	0.00818685	0.374461	Down	0.333088	0	LOC100258390	ITN1 {ECO:0000303|PubMed:18643991}; At3g12360; MQC3.17, T2E22.31	PREDICTED: ankyrin repeat-containing protein At3g12360-like [Vitis vinifera]	GO:0005634,GO:0005886,GO:0007165,GO:0009651,GO:0016021,GO:0034613	nucleus|plasma membrane|signal transduction|response to salt stress|integral component of membrane|cellular protein localization
chr9	3638001	3639000	1	1	163	0	377	1	-0.27	0	0.27	VIT_209s0002g03920	VIT_209s0002g03920	7.28097	14.5619	0	0	#NAME?	0.0470467	1	Down	0.14466	0	LOC100253256	PLA2G6; Synonyms=PLPLA9	unnamed protein product, partial [Vitis vinifera]
chr9	4001001	4002000	0.0112	0.104	42	0	65	9	-13.85	0	13.85	VIT_209s0002g04370	VIT_209s0002g04370	17.9079	3.88319	31.9325	8.22328	3.03971	0.0403568	1	Up	0.0755953	0.583058	LOC100241261	PCMP-H32; At3g23330; MLM24.6	PREDICTED: putative pentatricopeptide repeat-containing protein At3g23330 [Vitis vinifera]
chr9	4141001	4142000	1	1	10	0	380	3	-0.79	0	0.79	VIT_209s0002g04560	VIT_209s0002g04560	453.266	808.674	97.8578	0.12101	-3.0468	2.71558e-13	1.84388e-10	Down	18.2643	2.44219	LOC100261674	IQM4 {ECO:0000303|Ref.5}; At2g26190 {ECO:0000312|Araport:AT2G26190}	PREDICTED: uncharacterized protein LOC100261674 [Vitis vinifera]	GO:0005634,GO:0005737	nucleus|cytoplasm
chr9	5284001	5285000	0.15	0.544	134	0	197	4	-2.03	0	2.03	VIT_209s0002g05560	VIT_209s0002g05560	85.5672	149.503	21.6317	0.144691	-2.78895	0.000333817	0.0304838	Down	1.44965	0.241923	LOC100251419	PDR1	PREDICTED: pleiotropic drug resistance protein 1-like [Vitis vinifera]	GO:0005524,GO:0016021,GO:0016887	ATP binding|integral component of membrane|ATPase activity
chr9	5285001	5286000	1	1	10	0	869	4	-0.46	0	0.46	VIT_209s0002g05560	VIT_209s0002g05560	85.5672	149.503	21.6317	0.144691	-2.78895	0.000333817	0.0304838	Down	1.44965	0.241923	LOC100251419	PDR1	PREDICTED: pleiotropic drug resistance protein 1-like [Vitis vinifera]	GO:0005524,GO:0016021,GO:0016887	ATP binding|integral component of membrane|ATPase activity
chr9	5286001	5287000	1	1	10	0	141	3	-2.13	0	2.13	VIT_209s0002g05560	VIT_209s0002g05560	85.5672	149.503	21.6317	0.144691	-2.78895	0.000333817	0.0304838	Down	1.44965	0.241923	LOC100251419	PDR1	PREDICTED: pleiotropic drug resistance protein 1-like [Vitis vinifera]	GO:0005524,GO:0016021,GO:0016887	ATP binding|integral component of membrane|ATPase activity
chr9	6814001	6815000	0.323	0.809	42	0	20	1	-5	0	5	VIT_209s0002g06890	VIT_209s0002g06890	74.7699	132.028	17.5114	0.132634	-2.91448	0.00041442	0.0368064	Down	1.63634	0.312657	LOC100245669		unnamed protein product, partial [Vitis vinifera]	GO:0009055,GO:0046872	electron transfer activity|metal ion binding
chr9	18033001	18034000	0.00729	0.0769	50	0	279	31	-11.11	0	11.11	VIT_209s0018g01190	VIT_209s0018g01190	289.086	399.968	178.204	0.445546	-1.16635	0.00969481	0.426946	Down	6.70631	2.9037	LOC100265530	HST; Synonyms=HCT; At5g48930; K19E20.4	PREDICTED: shikimate O-hydroxycinnamoyltransferase [Vitis vinifera]	GO:0005737,GO:0005829,GO:0009809,GO:0009963,GO:0010252,GO:0016020,GO:0047172,GO:0047205,GO:0071555	cytoplasm|cytosol|lignin biosynthetic process|positive regulation of flavonoid biosynthetic process|auxin homeostasis|membrane|shikimate O-hydroxycinnamoyltransferase activity|quinate O-hydroxycinnamoyltransferase activity|cell wall organization	path:vvi00940,path:vvi00941,path:vvi00945	Phenylpropanoid biosynthesis|Flavonoid biosynthesis|Stilbenoid, diarylheptanoid and gingerol biosynthesis
chr9	18038001	18039000	0.152	0.549	21	2	32	0	9.52	9.52	0	VIT_209s0018g01190	VIT_209s0018g01190	289.086	399.968	178.204	0.445546	-1.16635	0.00969481	0.426946	Down	6.70631	2.9037	LOC100265530	HST; Synonyms=HCT; At5g48930; K19E20.4	PREDICTED: shikimate O-hydroxycinnamoyltransferase [Vitis vinifera]	GO:0005737,GO:0005829,GO:0009809,GO:0009963,GO:0010252,GO:0016020,GO:0047172,GO:0047205,GO:0071555	cytoplasm|cytosol|lignin biosynthetic process|positive regulation of flavonoid biosynthetic process|auxin homeostasis|membrane|shikimate O-hydroxycinnamoyltransferase activity|quinate O-hydroxycinnamoyltransferase activity|cell wall organization	path:vvi00940,path:vvi00941,path:vvi00945	Phenylpropanoid biosynthesis|Flavonoid biosynthesis|Stilbenoid, diarylheptanoid and gingerol biosynthesis
chr9	19479001	19480000	2.04e-08	2.1e-06	84	74	10	0	88.1	88.1	0	VIT_209s0018g01870	VIT_209s0018g01870	390.286	594.128	186.445	0.313813	-1.67202	4.67703e-05	0.00602157	Down	6.96145	1.95178	LOC100241666	PGDH2; Synonyms=3-PGDH, PGDH; At1g17745; F11A6.8	PREDICTED: D-3-phosphoglycerate dehydrogenase 3, chloroplastic-like [Vitis vinifera]	GO:0004617,GO:0005634,GO:0005829,GO:0006564,GO:0009507,GO:0009570,GO:0051287	phosphoglycerate dehydrogenase activity|nucleus|cytosol|L-serine biosynthetic process|chloroplast|chloroplast stroma|NAD binding	path:vvi00260	Glycine, serine and threonine metabolism
chr9	19480001	19481000	1	1	22	0	244	2	-0.82	0	0.82	VIT_209s0018g01870	VIT_209s0018g01870	390.286	594.128	186.445	0.313813	-1.67202	4.67703e-05	0.00602157	Down	6.96145	1.95178	LOC100241666	PGDH2; Synonyms=3-PGDH, PGDH; At1g17745; F11A6.8	PREDICTED: D-3-phosphoglycerate dehydrogenase 3, chloroplastic-like [Vitis vinifera]	GO:0004617,GO:0005634,GO:0005829,GO:0006564,GO:0009507,GO:0009570,GO:0051287	phosphoglycerate dehydrogenase activity|nucleus|cytosol|L-serine biosynthetic process|chloroplast|chloroplast stroma|NAD binding	path:vvi00260	Glycine, serine and threonine metabolism
chr9	21506001	21507000	1	1	20	0	155	1	-0.65	0	0.65	VIT_209s0054g00690	VIT_209s0054g00690	15.4512	0	30.9025	Inf	Inf	0.00233245	0.149682	Up	0	0.714688	LOC100251259		PREDICTED: vacuolar-processing enzyme [Vitis vinifera]	GO:0008234	cysteine-type peptidase activity
chr10	462001	463000	0.477	0.97	63	1	69	0	1.59	1.59	0	VIT_210s0116g00960	VIT_210s0116g00960	80.3353	118.437	42.2334	0.356589	-1.48767	0.0469071	1	Down	1.72197	0.654355	LOC100250303	JMJ25; Synonyms=IBM1; At3g07610; MLP3.6	PREDICTED: lysine-specific demethylase JMJ25-like [Vitis vinifera]	GO:0000785,GO:0000976,GO:0005634,GO:0006351,GO:0006355,GO:0032454,GO:0046872,GO:0051213,GO:0060969	chromatin|transcription regulatory region sequence-specific DNA binding|nucleus|transcription, DNA-templated|regulation of transcription, DNA-templated|histone demethylase activity (H3-K9 specific)|metal ion binding|dioxygenase activity|negative regulation of gene silencing
chr10	465001	466000	1	1	268	2	50	0	0.75	0.75	0	VIT_210s0116g00960	VIT_210s0116g00960	80.3353	118.437	42.2334	0.356589	-1.48767	0.0469071	1	Down	1.72197	0.654355	LOC100250303	JMJ25; Synonyms=IBM1; At3g07610; MLP3.6	PREDICTED: lysine-specific demethylase JMJ25-like [Vitis vinifera]	GO:0000785,GO:0000976,GO:0005634,GO:0006351,GO:0006355,GO:0032454,GO:0046872,GO:0051213,GO:0060969	chromatin|transcription regulatory region sequence-specific DNA binding|nucleus|transcription, DNA-templated|regulation of transcription, DNA-templated|histone demethylase activity (H3-K9 specific)|metal ion binding|dioxygenase activity|negative regulation of gene silencing
chr10	1427001	1428000	0.509	0.995	638	2	485	0	0.31	0.31	0	VIT_210s0003g00130	VIT_210s0003g00130	46.2907	86.4009	6.18049	0.0715327	-3.80525	0.000353962	0.03184	Down	4.07389	0.274911	LOC100243417	ERF12; Synonyms=ERF-12, ERF081; At1g28360; F3M18.21	PREDICTED: ethylene-responsive transcription factor 12 [Vitis vinifera]	GO:0003677,GO:0003700,GO:0005634,GO:0006351,GO:0006952,GO:0009873	DNA binding|DNA binding transcription factor activity|nucleus|transcription, DNA-templated|defense response|ethylene-activated signaling pathway
chr10	1820001	1821000	7.06e-05	0.00222	398	29	155	0	7.29	7.29	0	VIT_210s0003g00580	VIT_210s0003g00580	279.415	480.544	78.2862	0.162912	-2.61784	6.5649e-08	1.58833e-05	Down	18.8745	2.86069	LOC100264074	PTI5	PREDICTED: pathogenesis-related genes transcriptional activator PTI5-like [Vitis vinifera]	GO:0003677,GO:0003700,GO:0005634,GO:0006351,GO:0006952	DNA binding|DNA binding transcription factor activity|nucleus|transcription, DNA-templated|defense response
chr10	1821001	1822000	8.83e-07	5.8e-05	210	46	70	0	21.9	21.9	0	VIT_210s0003g00580	VIT_210s0003g00580	279.415	480.544	78.2862	0.162912	-2.61784	6.5649e-08	1.58833e-05	Down	18.8745	2.86069	LOC100264074	PTI5	PREDICTED: pathogenesis-related genes transcriptional activator PTI5-like [Vitis vinifera]	GO:0003677,GO:0003700,GO:0005634,GO:0006351,GO:0006952	DNA binding|DNA binding transcription factor activity|nucleus|transcription, DNA-templated|defense response
chr10	2471001	2472000	0.00676	0.0729	457	22	130	0	4.81	4.81	0	VIT_210s0003g01100	VIT_210s0003g01100	8.7557	0	17.5114	Inf	Inf	0.0247937	0.833678	Up	0	0.497506	LOC100246411	OsI_14861 {ECO:0000312|EMBL:EAY93058.1}	PREDICTED: senescence-specific cysteine protease SAG39-like [Vitis vinifera]	GO:0007568,GO:0008234,GO:0009723,GO:0009737,GO:0009739,GO:0010150,GO:0010282,GO:0010623	aging|cysteine-type peptidase activity|response to ethylene|response to abscisic acid|response to gibberellin|leaf senescence|senescence-associated vacuole|programmed cell death involved in cell development
chr10	2472001	2473000	0.556	1	212	0	463	3	-0.65	0	0.65	VIT_210s0003g01100	VIT_210s0003g01100	8.7557	0	17.5114	Inf	Inf	0.0247937	0.833678	Up	0	0.497506	LOC100246411	OsI_14861 {ECO:0000312|EMBL:EAY93058.1}	PREDICTED: senescence-specific cysteine protease SAG39-like [Vitis vinifera]	GO:0007568,GO:0008234,GO:0009723,GO:0009737,GO:0009739,GO:0010150,GO:0010282,GO:0010623	aging|cysteine-type peptidase activity|response to ethylene|response to abscisic acid|response to gibberellin|leaf senescence|senescence-associated vacuole|programmed cell death involved in cell development
chr10	2474001	2475000	0.19	0.62	255	0	60	1	-1.67	0	1.67	VIT_210s0003g01100	VIT_210s0003g01100	8.7557	0	17.5114	Inf	Inf	0.0247937	0.833678	Up	0	0.497506	LOC100246411	OsI_14861 {ECO:0000312|EMBL:EAY93058.1}	PREDICTED: senescence-specific cysteine protease SAG39-like [Vitis vinifera]	GO:0007568,GO:0008234,GO:0009723,GO:0009737,GO:0009739,GO:0010150,GO:0010282,GO:0010623	aging|cysteine-type peptidase activity|response to ethylene|response to abscisic acid|response to gibberellin|leaf senescence|senescence-associated vacuole|programmed cell death involved in cell development
chr10	2533001	2534000	1	1	103	0	212	1	-0.47	0	0.47	VIT_210s0003g01160	VIT_210s0003g01160	31.1544	59.2186	3.09025	0.0521837	-4.26026	0.00110429	0.0824261	Down	1.63914	0.0798673	LOC100256680	BHLH30; Synonyms=EN53; At1g68810; F14K14.8, T6L1.1	PREDICTED: transcription factor bHLH106-like [Vitis vinifera]	GO:0003677,GO:0003700,GO:0005634,GO:0006351,GO:0006355,GO:0046983	DNA binding|DNA binding transcription factor activity|nucleus|transcription, DNA-templated|regulation of transcription, DNA-templated|protein dimerization activity
chr10	2536001	2537000	0.0297	0.202	85	10	40	0	11.76	11.76	0	VIT_210s0003g01160	VIT_210s0003g01160	31.1544	59.2186	3.09025	0.0521837	-4.26026	0.00110429	0.0824261	Down	1.63914	0.0798673	LOC100256680	BHLH30; Synonyms=EN53; At1g68810; F14K14.8, T6L1.1	PREDICTED: transcription factor bHLH106-like [Vitis vinifera]	GO:0003677,GO:0003700,GO:0005634,GO:0006351,GO:0006355,GO:0046983	DNA binding|DNA binding transcription factor activity|nucleus|transcription, DNA-templated|regulation of transcription, DNA-templated|protein dimerization activity
chr10	6926001	6927000	0.424	0.915	260	0	191	1	-0.52	0	0.52	VIT_210s0003g04080	VIT_210s0003g04080	85.0929	165.035	5.15041	0.0312079	-5.00194	6.72798e-08	1.60929e-05	Down	5.74515	0.227715	LOC104880522		PREDICTED: uncharacterized protein LOC104880522 [Vitis vinifera]
chr10	6955001	6956000	0.0186	0.147	125	5	417	3	3.28	4	0.72	VIT_210s0003g04100	VIT_210s0003g04100	466.972	646.551	287.393	0.444502	-1.16974	0.0021045	0.138864	Down	6.42578	2.62923	LOC100242923	ARF6; At1g30330; T4K22.6	PREDICTED: auxin response factor 6 [Vitis vinifera]	GO:0003677,GO:0003700,GO:0005634,GO:0006351,GO:0009733,GO:0009734,GO:0009908	DNA binding|DNA binding transcription factor activity|nucleus|transcription, DNA-templated|response to auxin|auxin-activated signaling pathway|flower development
chr10	6959001	6960000	1	1	150	1	10	0	0.67	0.67	0	VIT_210s0003g04100	VIT_210s0003g04100	466.972	646.551	287.393	0.444502	-1.16974	0.0021045	0.138864	Down	6.42578	2.62923	LOC100242923	ARF6; At1g30330; T4K22.6	PREDICTED: auxin response factor 6 [Vitis vinifera]	GO:0003677,GO:0003700,GO:0005634,GO:0006351,GO:0009733,GO:0009734,GO:0009908	DNA binding|DNA binding transcription factor activity|nucleus|transcription, DNA-templated|response to auxin|auxin-activated signaling pathway|flower development
chr10	6962001	6963000	0.014	0.121	910	3	420	7	-1.34	0.33	1.67	VIT_210s0003g04100	VIT_210s0003g04100	466.972	646.551	287.393	0.444502	-1.16974	0.0021045	0.138864	Down	6.42578	2.62923	LOC100242923	ARF6; At1g30330; T4K22.6	PREDICTED: auxin response factor 6 [Vitis vinifera]	GO:0003677,GO:0003700,GO:0005634,GO:0006351,GO:0009733,GO:0009734,GO:0009908	DNA binding|DNA binding transcription factor activity|nucleus|transcription, DNA-templated|response to auxin|auxin-activated signaling pathway|flower development
chr10	6964001	6965000	1	1	169	0	229	1	-0.44	0	0.44	VIT_210s0003g04100	VIT_210s0003g04100	466.972	646.551	287.393	0.444502	-1.16974	0.0021045	0.138864	Down	6.42578	2.62923	LOC100242923	ARF6; At1g30330; T4K22.6	PREDICTED: auxin response factor 6 [Vitis vinifera]	GO:0003677,GO:0003700,GO:0005634,GO:0006351,GO:0009733,GO:0009734,GO:0009908	DNA binding|DNA binding transcription factor activity|nucleus|transcription, DNA-templated|response to auxin|auxin-activated signaling pathway|flower development
chr10	9867001	9868000	1	1	30	0	138	3	-2.17	0	2.17	VIT_210s0003g05330	VIT_210s0003g05330	143.652	203.867	83.4366	0.409269	-1.28888	0.0300268	0.93697	Down	3.59846	1.41578	LOC104880535		unnamed protein product, partial [Vitis vinifera]
chr10	10092001	10093000	0.158	0.56	40	2	60	0	5	5	0	VIT_210s0003g05450	VIT_210s0003g05450	372.375	674.704	70.0456	0.103817	-3.26789	5.21013e-13	3.32328e-10	Down	12.4928	1.27736	LOC100245607	At4g20840 {ECO:0000312|Araport:AT4G20840}; F21C20.190 {ECO:0000312|EMBL:CAB45850.1}	PREDICTED: reticuline oxidase-like protein [Vitis vinifera]	GO:0005618,GO:0005886,GO:0016614,GO:0048046,GO:0050660	cell wall|plasma membrane|oxidoreductase activity, acting on CH-OH group of donors|apoplast|flavin adenine dinucleotide binding
chr10	10097001	10098000	0.0256	0.183	794	0	2112	13	-0.62	0	0.62	VIT_210s0003g05450	VIT_210s0003g05450	372.375	674.704	70.0456	0.103817	-3.26789	5.21013e-13	3.32328e-10	Down	12.4928	1.27736	LOC100245607	At4g20840 {ECO:0000312|Araport:AT4G20840}; F21C20.190 {ECO:0000312|EMBL:CAB45850.1}	PREDICTED: reticuline oxidase-like protein [Vitis vinifera]	GO:0005618,GO:0005886,GO:0016614,GO:0048046,GO:0050660	cell wall|plasma membrane|oxidoreductase activity, acting on CH-OH group of donors|apoplast|flavin adenine dinucleotide binding
chr10	10099001	10100000	1	1	41	0	269	1	-0.37	0	0.37	VIT_210s0003g05450	VIT_210s0003g05450	372.375	674.704	70.0456	0.103817	-3.26789	5.21013e-13	3.32328e-10	Down	12.4928	1.27736	LOC100245607	At4g20840 {ECO:0000312|Araport:AT4G20840}; F21C20.190 {ECO:0000312|EMBL:CAB45850.1}	PREDICTED: reticuline oxidase-like protein [Vitis vinifera]	GO:0005618,GO:0005886,GO:0016614,GO:0048046,GO:0050660	cell wall|plasma membrane|oxidoreductase activity, acting on CH-OH group of donors|apoplast|flavin adenine dinucleotide binding
chr10	16363001	16364000	0.0523	0.292	30	7	30	1	20	23.33	3.33	VIT_210s0071g00190	VIT_210s0071g00190	25.8743	46.5982	5.15041	0.110528	-3.17752	0.0135464	0.541965	Down	0.771086	0.0795888	LOC100253123	At5g66900; MUD21.16	PREDICTED: probable disease resistance protein At5g66900 [Vitis vinifera]
chr10	16617001	16618000	0.554	1	265	3	138	0	1.13	1.13	0	VIT_210s0071g00320	VIT_210s0071g00320	197.905	282.502	113.309	0.401091	-1.318	0.0118673	0.488834	Down	6.19019	2.43017	LOC100246424	At5g08350; F8L15_80	PREDICTED: GEM-like protein 4 [Vitis vinifera]
chr10	16622001	16623000	1	1	10	0	600	1	-0.17	0	0.17	VIT_210s0071g00320	VIT_210s0071g00320	197.905	282.502	113.309	0.401091	-1.318	0.0118673	0.488834	Down	6.19019	2.43017	LOC100246424	At5g08350; F8L15_80	PREDICTED: GEM-like protein 4 [Vitis vinifera]
chr11	310001	311000	0.202	0.639	229	1	214	4	-1.43	0.44	1.87	VIT_211s0016g00290	VIT_211s0016g00290	16.5925	30.0947	3.09025	0.102684	-3.28372	0.0370397	1	Down	0.373434	0.0356959	LOC104880619	PMEU1	PREDICTED: pectinesterase-like [Vitis vinifera]	GO:0005576,GO:0005618,GO:0030599,GO:0042545,GO:0045330,GO:0045490,GO:0046910,GO:0071944	extracellular region|cell wall|pectinesterase activity|cell wall modification|aspartyl esterase activity|pectin catabolic process|pectinesterase inhibitor activity|cell periphery	path:vvi00040	Pentose and glucuronate interconversions
chr11	311001	312000	0.249	0.711	73	1	220	0	1.37	1.37	0	VIT_211s0016g00290	VIT_211s0016g00290	16.5925	30.0947	3.09025	0.102684	-3.28372	0.0370397	1	Down	0.373434	0.0356959	LOC104880619	PMEU1	PREDICTED: pectinesterase-like [Vitis vinifera]	GO:0005576,GO:0005618,GO:0030599,GO:0042545,GO:0045330,GO:0045490,GO:0046910,GO:0071944	extracellular region|cell wall|pectinesterase activity|cell wall modification|aspartyl esterase activity|pectin catabolic process|pectinesterase inhibitor activity|cell periphery	path:vvi00040	Pentose and glucuronate interconversions
chr11	699001	700000	0.364	0.851	145	0	83	1	-1.2	0	1.2	VIT_211s0016g00730	VIT_211s0016g00730	59.4002	28.1531	90.6472	3.21979	1.68697	0.0458432	1	Up	1.2299	4.13221	LOC100268126	LHCA6 {ECO:0000303|PubMed:10366881}; At1g19150 {ECO:0000312|Araport:AT1G19150}; T29M8.2 {ECO:0000312|EMBL:AAF82226.1}	PREDICTED: chlorophyll a-b binding protein, chloroplastic [Vitis vinifera]	GO:0009507,GO:0009522,GO:0009535,GO:0009637,GO:0009768,GO:0009941,GO:0010114,GO:0010218,GO:0010287,GO:0016021,GO:0016168,GO:0018298,GO:0031409,GO:0046872	chloroplast|photosystem I|chloroplast thylakoid membrane|response to blue light|photosynthesis, light harvesting in photosystem I|chloroplast envelope|response to red light|response to far red light|plastoglobule|integral component of membrane|chlorophyll binding|protein-chromophore linkage|pigment binding|metal ion binding	path:vvi00196	Photosynthesis - antenna proteins
chr11	701001	702000	1	1	404	3	53	0	0.74	0.74	0	VIT_211s0016g00730	VIT_211s0016g00730	59.4002	28.1531	90.6472	3.21979	1.68697	0.0458432	1	Up	1.2299	4.13221	LOC100268126	LHCA6 {ECO:0000303|PubMed:10366881}; At1g19150 {ECO:0000312|Araport:AT1G19150}; T29M8.2 {ECO:0000312|EMBL:AAF82226.1}	PREDICTED: chlorophyll a-b binding protein, chloroplastic [Vitis vinifera]	GO:0009507,GO:0009522,GO:0009535,GO:0009637,GO:0009768,GO:0009941,GO:0010114,GO:0010218,GO:0010287,GO:0016021,GO:0016168,GO:0018298,GO:0031409,GO:0046872	chloroplast|photosystem I|chloroplast thylakoid membrane|response to blue light|photosynthesis, light harvesting in photosystem I|chloroplast envelope|response to red light|response to far red light|plastoglobule|integral component of membrane|chlorophyll binding|protein-chromophore linkage|pigment binding|metal ion binding	path:vvi00196	Photosynthesis - antenna proteins
chr11	866001	867000	1	1	10	0	942	10	-1.06	0	1.06	VIT_211s0016g01060	VIT_211s0016g01060	33.7	60.1894	7.21057	0.119798	-3.06132	0.00741997	0.348623	Down	0.56198	0.0723388	LOC100257697	RIPK {ECO:0000303|PubMed:21320696}; Synonyms=PBL14 {ECO:0000303|PubMed:20413097}, PIX8 {ECO:0000303|PubMed:23951354}; At2g05940 {ECO:0000312|Araport:AT2G05940}	PREDICTED: serine/threonine-protein kinase At5g01020 [Vitis vinifera]
chr11	868001	869000	0.0814	0.383	372	5	260	0	1.34	1.34	0	VIT_211s0016g01060	VIT_211s0016g01060	33.7	60.1894	7.21057	0.119798	-3.06132	0.00741997	0.348623	Down	0.56198	0.0723388	LOC100257697	RIPK {ECO:0000303|PubMed:21320696}; Synonyms=PBL14 {ECO:0000303|PubMed:20413097}, PIX8 {ECO:0000303|PubMed:23951354}; At2g05940 {ECO:0000312|Araport:AT2G05940}	PREDICTED: serine/threonine-protein kinase At5g01020 [Vitis vinifera]
chr11	1045001	1046000	1	1	352	2	100	0	0.57	0.57	0	VIT_211s0016g01300	VIT_211s0016g01300	31.2989	3.88319	58.7147	15.1202	3.91841	0.00179016	0.12436	Up	0.0812995	1.0431	LOC100254224	TT2; Synonyms=MYB123; At5g35550; MOK9.18	PREDICTED: transcription factor TT2-like [Vitis vinifera]	GO:0000981,GO:0001135,GO:0003700,GO:0005524,GO:0005634,GO:0006351,GO:0006357,GO:0006633,GO:0006970,GO:0009813,GO:0010023,GO:0030154,GO:0043565,GO:0044212	RNA polymerase II transcription factor activity, sequence-specific DNA binding|transcription factor activity, RNA polymerase II transcription factor recruiting|DNA binding transcription factor activity|ATP binding|nucleus|transcription, DNA-templated|regulation of transcription from RNA polymerase II promoter|fatty acid biosynthetic process|response to osmotic stress|flavonoid biosynthetic proces…
chr11	1217001	1218000	0.0419	0.253	1281	28	195	0	2.19	2.19	0	VIT_211s0016g01530	VIT_211s0016g01530	315.112	627.135	3.09025	0.00492756	-7.66491	3.87018e-28	2.03659e-24	Down	12.0988	0.0566515	LOC100250779		PREDICTED: ankyrin repeat-containing protein At2g01680-like [Vitis vinifera]
chr11	2193001	2194000	1	1	149	0	209	1	-0.48	0	0.48	VIT_211s0016g02780	VIT_211s0016g02780	11.1642	22.3283	0	0	#NAME?	0.0114769	0.476485	Down	0.50497	0	LOC100243880	MYB36 {ECO:0000303|PubMed:9839469}; At5g57620 {ECO:0000312|Araport:AT5G57620}; MUA2.20 {ECO:0000312|EMBL:BAB08797.1}	PREDICTED: transcription factor RAX2 [Vitis vinifera]	GO:0000981,GO:0001135,GO:0003700,GO:0005634,GO:0006351,GO:0006357,GO:0008285,GO:0030154,GO:0035987,GO:0043565,GO:0044212,GO:0045597,GO:0045892,GO:0045893,GO:0048226,GO:2000021,GO:2000067	RNA polymerase II transcription factor activity, sequence-specific DNA binding|transcription factor activity, RNA polymerase II transcription factor recruiting|DNA binding transcription factor activity|nucleus|transcription, DNA-templated|regulation of transcription from RNA polymerase II promoter|negative regulation of cell proliferation|cell differentiation|endodermal cell differentiation|seque…
chr11	2477001	2478000	1	1	215	0	252	1	-0.4	0	0.4	VIT_211s0016g03080	VIT_211s0016g03080	351.284	623.251	79.3163	0.127262	-2.97412	5.77538e-11	2.53263e-08	Down	6.86317	0.832182	LOC100247568	HSL1; At1g28440; F3M18.12	PREDICTED: receptor-like protein kinase 5 [Vitis vinifera]
chr11	2478001	2479000	1	1	323	5	60	0	1.55	1.55	0	VIT_211s0016g03080	VIT_211s0016g03080	351.284	623.251	79.3163	0.127262	-2.97412	5.77538e-11	2.53263e-08	Down	6.86317	0.832182	LOC100247568	HSL1; At1g28440; F3M18.12	PREDICTED: receptor-like protein kinase 5 [Vitis vinifera]
chr11	2479001	2480000	0.449	0.941	216	1	265	0	0.46	0.46	0	VIT_211s0016g03080	VIT_211s0016g03080	351.284	623.251	79.3163	0.127262	-2.97412	5.77538e-11	2.53263e-08	Down	6.86317	0.832182	LOC100247568	HSL1; At1g28440; F3M18.12	PREDICTED: receptor-like protein kinase 5 [Vitis vinifera]
chr11	2481001	2482000	0.368	0.856	264	0	154	1	-0.65	0	0.65	VIT_211s0016g03080	VIT_211s0016g03080	351.284	623.251	79.3163	0.127262	-2.97412	5.77538e-11	2.53263e-08	Down	6.86317	0.832182	LOC100247568	HSL1; At1g28440; F3M18.12	PREDICTED: receptor-like protein kinase 5 [Vitis vinifera]
chr11	2483001	2484000	1	1	320	1	204	0	0.31	0.31	0	VIT_211s0016g03080	VIT_211s0016g03080	351.284	623.251	79.3163	0.127262	-2.97412	5.77538e-11	2.53263e-08	Down	6.86317	0.832182	LOC100247568	HSL1; At1g28440; F3M18.12	PREDICTED: receptor-like protein kinase 5 [Vitis vinifera]
chr11	6015001	6016000	0.6	1	217	7	40	0	3.23	3.23	0	VIT_211s0118g00350	VIT_211s0118g00350	820.427	490.252	1150.6	2.34696	1.23079	0.000132023	0.0143245	Up	9.43779	20.8914	VPP2		unnamed protein product, partial [Vitis vinifera]	GO:0004427,GO:0005774,GO:0009678,GO:0015992,GO:0016021,GO:0046872	inorganic diphosphatase activity|vacuolar membrane|hydrogen-translocating pyrophosphatase activity|proton transport|integral component of membrane|metal ion binding
chr11	8369001	8370000	1	1	31	0	235	1	-0.43	0	0.43	VIT_211s0037g00530	VIT_211s0037g00530	10.8159	0	21.6317	Inf	Inf	0.0116207	0.479615	Up	0	0.164505	LOC100248512	CESA9; Os09g0422500, LOC_Os09g25490; OJ1740_D06.31, OsJ_028258, P0418B08.2	PREDICTED: cellulose synthase A catalytic subunit 7 [UDP-forming] [Vitis vinifera]	GO:0005794,GO:0005886,GO:0009507,GO:0009833,GO:0009834,GO:0010330,GO:0010400,GO:0016021,GO:0016759,GO:0016760,GO:0030244,GO:0046872	Golgi apparatus|plasma membrane|chloroplast|plant-type primary cell wall biogenesis|plant-type secondary cell wall biogenesis|cellulose synthase complex|rhamnogalacturonan I side chain metabolic process|integral component of membrane|cellulose synthase activity|cellulose synthase (UDP-forming) activity|cellulose biosynthetic process|metal ion binding
chr11	8371001	8372000	0.0134	0.118	833	2	376	6	-1.36	0.24	1.6	VIT_211s0037g00530	VIT_211s0037g00530	10.8159	0	21.6317	Inf	Inf	0.0116207	0.479615	Up	0	0.164505	LOC100248512	CESA9; Os09g0422500, LOC_Os09g25490; OJ1740_D06.31, OsJ_028258, P0418B08.2	PREDICTED: cellulose synthase A catalytic subunit 7 [UDP-forming] [Vitis vinifera]	GO:0005794,GO:0005886,GO:0009507,GO:0009833,GO:0009834,GO:0010330,GO:0010400,GO:0016021,GO:0016759,GO:0016760,GO:0030244,GO:0046872	Golgi apparatus|plasma membrane|chloroplast|plant-type primary cell wall biogenesis|plant-type secondary cell wall biogenesis|cellulose synthase complex|rhamnogalacturonan I side chain metabolic process|integral component of membrane|cellulose synthase activity|cellulose synthase (UDP-forming) activity|cellulose biosynthetic process|metal ion binding
chr11	8374001	8375000	1	1	519	2	60	0	0.39	0.39	0	VIT_211s0037g00530	VIT_211s0037g00530	10.8159	0	21.6317	Inf	Inf	0.0116207	0.479615	Up	0	0.164505	LOC100248512	CESA9; Os09g0422500, LOC_Os09g25490; OJ1740_D06.31, OsJ_028258, P0418B08.2	PREDICTED: cellulose synthase A catalytic subunit 7 [UDP-forming] [Vitis vinifera]	GO:0005794,GO:0005886,GO:0009507,GO:0009833,GO:0009834,GO:0010330,GO:0010400,GO:0016021,GO:0016759,GO:0016760,GO:0030244,GO:0046872	Golgi apparatus|plasma membrane|chloroplast|plant-type primary cell wall biogenesis|plant-type secondary cell wall biogenesis|cellulose synthase complex|rhamnogalacturonan I side chain metabolic process|integral component of membrane|cellulose synthase activity|cellulose synthase (UDP-forming) activity|cellulose biosynthetic process|metal ion binding
chr11	8375001	8376000	0.271	0.742	361	2	40	1	-1.95	0.55	2.5	VIT_211s0037g00530	VIT_211s0037g00530	10.8159	0	21.6317	Inf	Inf	0.0116207	0.479615	Up	0	0.164505	LOC100248512	CESA9; Os09g0422500, LOC_Os09g25490; OJ1740_D06.31, OsJ_028258, P0418B08.2	PREDICTED: cellulose synthase A catalytic subunit 7 [UDP-forming] [Vitis vinifera]	GO:0005794,GO:0005886,GO:0009507,GO:0009833,GO:0009834,GO:0010330,GO:0010400,GO:0016021,GO:0016759,GO:0016760,GO:0030244,GO:0046872	Golgi apparatus|plasma membrane|chloroplast|plant-type primary cell wall biogenesis|plant-type secondary cell wall biogenesis|cellulose synthase complex|rhamnogalacturonan I side chain metabolic process|integral component of membrane|cellulose synthase activity|cellulose synthase (UDP-forming) activity|cellulose biosynthetic process|metal ion binding
chr11	17423001	17424000	0.419	0.91	62	1	86	0	1.61	1.61	0	VIT_211s0052g00260	VIT_211s0052g00260	37.2423	11.6496	62.835	5.39377	2.43129	0.0205646	0.742479	Up	0.128256	2.43796	LOC100266751	ACD11 {ECO:0000303|PubMed:11850411}; At2g34690 {ECO:0000312|Araport:AT2G34690}; T29F13.10 {ECO:0000312|EMBL:AAC16265.1}	unnamed protein product, partial [Vitis vinifera]	GO:0005737,GO:0008219,GO:0008289,GO:0009751,GO:0009816,GO:0010175,GO:0120013	cytoplasm|cell death|lipid binding|response to salicylic acid|defense response to bacterium, incompatible interaction|sphingosine transmembrane transporter activity|intermembrane lipid transfer activity
chr11	18990001	18991000	1	1	572	7	20	0	1.22	1.22	0	VIT_211s0052g01260	VIT_211s0052g01260	26.8451	48.5398	5.15041	0.106107	-3.23641	0.0110042	0.462973	Down	2.43766	0.197602	LOC100251303	XTH23; Synonyms=XTR6; At4g25810; F14M19.90	PREDICTED: probable xyloglucan endotransglucosylase/hydrolase protein 23 [Vitis vinifera]	GO:0004553,GO:0005618,GO:0005794,GO:0010411,GO:0016762,GO:0042546,GO:0048046,GO:0071555	hydrolase activity, hydrolyzing O-glycosyl compounds|cell wall|Golgi apparatus|xyloglucan metabolic process|xyloglucan:xyloglucosyl transferase activity|cell wall biogenesis|apoplast|cell wall organization
chr11	19171001	19172000	1	1	289	1	170	0	0.35	0.35	0	VIT_211s0052g01460	VIT_211s0052g01460	36.642	65.0434	8.24066	0.126695	-2.98057	0.00667728	0.329157	Down	1.15977	0.161748	LOC100854235	XA21 {ECO:0000303|Ref.1}	PREDICTED: probable LRR receptor-like serine/threonine-protein kinase At3g47570 [Vitis vinifera]	GO:0004674,GO:0005524,GO:0005634,GO:0005789,GO:0005886,GO:0006952,GO:0016021,GO:0031349,GO:0046777,GO:1900426	protein serine/threonine kinase activity|ATP binding|nucleus|endoplasmic reticulum membrane|plasma membrane|defense response|integral component of membrane|positive regulation of defense response|protein autophosphorylation|positive regulation of defense response to bacterium
chr11	19173001	19174000	0.000204	0.00517	30	6	162	2	18.77	20	1.23	VIT_211s0052g01460	VIT_211s0052g01460	36.642	65.0434	8.24066	0.126695	-2.98057	0.00667728	0.329157	Down	1.15977	0.161748	LOC100854235	XA21 {ECO:0000303|Ref.1}	PREDICTED: probable LRR receptor-like serine/threonine-protein kinase At3g47570 [Vitis vinifera]	GO:0004674,GO:0005524,GO:0005634,GO:0005789,GO:0005886,GO:0006952,GO:0016021,GO:0031349,GO:0046777,GO:1900426	protein serine/threonine kinase activity|ATP binding|nucleus|endoplasmic reticulum membrane|plasma membrane|defense response|integral component of membrane|positive regulation of defense response|protein autophosphorylation|positive regulation of defense response to bacterium
chr12	2351001	2352000	0.0639	0.33	30	0	21	3	-14.29	0	14.29	VIT_212s0028g01700	VIT_212s0028g01700	36.1566	64.0726	8.24066	0.128614	-2.95888	0.00731105	0.345994	Down	2.15928	0.201962	LOC100250582	WRKY69; At3g58710; T20N10_60	PREDICTED: probable WRKY transcription factor 65 [Vitis vinifera]	GO:0003700,GO:0005634,GO:0006351,GO:0043565	DNA binding transcription factor activity|nucleus|transcription, DNA-templated|sequence-specific DNA binding
chr12	3891001	3892000	1	1	110	1	44	0	0.91	0.91	0	VIT_212s0028g03110	VIT_212s0028g03110	24.6034	3.88319	45.3236	11.6718	3.54495	0.00840303	0.382847	Up	0.421108	2.74103	LOC100266060	CCOAOMT2	unnamed protein product, partial [Vitis vinifera]	GO:0009809,GO:0042409,GO:0046872	lignin biosynthetic process|caffeoyl-CoA O-methyltransferase activity|metal ion binding	path:vvi00360,path:vvi00940,path:vvi00941,path:vvi00945	Phenylalanine metabolism|Phenylpropanoid biosynthesis|Flavonoid biosynthesis|Stilbenoid, diarylheptanoid and gingerol biosynthesis
chr12	3891001	3892000	1	1	110	1	44	0	0.91	0.91	0	VIT_212s0028g03120	VIT_212s0028g03120	529.759	799.936	259.581	0.324502	-1.6237	1.15599e-05	0.00170156	Down	23.2999	6.9415	LOC100243744		PREDICTED: protein E6 isoform X1 [Vitis vinifera]
chr12	5576001	5577000	1	1	205	1	20	0	0.49	0.49	0	VIT_212s0059g00770	VIT_212s0059g00770	10.7084	20.3867	1.03008	0.0505271	-4.3068	0.0442587	1	Down	0.221978	0.0158438	LOC100260211	Bp10	PREDICTED: L-ascorbate oxidase homolog [Vitis vinifera]	GO:0005507,GO:0005576,GO:0016491	copper ion binding|extracellular region|oxidoreductase activity
chr12	5577001	5578000	1	1	92	0	179	1	-0.56	0	0.56	VIT_212s0059g00770	VIT_212s0059g00770	10.7084	20.3867	1.03008	0.0505271	-4.3068	0.0442587	1	Down	0.221978	0.0158438	LOC100260211	Bp10	PREDICTED: L-ascorbate oxidase homolog [Vitis vinifera]	GO:0005507,GO:0005576,GO:0016491	copper ion binding|extracellular region|oxidoreductase activity
chr12	9022001	9023000	1	1	165	0	224	1	-0.45	0	0.45	VIT_212s0057g00420	VIT_212s0057g00420	582.5	1063.02	101.978	0.0959322	-3.38184	6.4153e-18	7.10714e-15	Down	14.5746	1.36447	LOC100258038	At5g35735; F28J9_6	PREDICTED: cytochrome b561 and DOMON domain-containing protein At5g35735 [Vitis vinifera]	GO:0005886,GO:0016021,GO:0046872,GO:0055114	plasma membrane|integral component of membrane|metal ion binding|oxidation-reduction process
chr12	9026001	9027000	1	1	10	0	436	3	-0.69	0	0.69	VIT_212s0057g00420	VIT_212s0057g00420	582.5	1063.02	101.978	0.0959322	-3.38184	6.4153e-18	7.10714e-15	Down	14.5746	1.36447	LOC100258038	At5g35735; F28J9_6	PREDICTED: cytochrome b561 and DOMON domain-containing protein At5g35735 [Vitis vinifera]	GO:0005886,GO:0016021,GO:0046872,GO:0055114	plasma membrane|integral component of membrane|metal ion binding|oxidation-reduction process
chr12	9242001	9243000	1	1	319	2	40	0	0.63	0.63	0	VIT_212s0057g00613	VIT_212s0057g00613	66.2217	125.233	7.21057	0.0575774	-4.11835	1.37747e-05	0.00198592	Down	1.49081	0.0607216	LOC109123452	ACA13; At3g22910; F5N5.8	hypothetical protein VITISV_000631 [Vitis vinifera]	GO:0005388,GO:0005516,GO:0005524,GO:0005887,GO:0043231,GO:0046872	calcium-transporting ATPase activity|calmodulin binding|ATP binding|integral component of plasma membrane|intracellular membrane-bounded organelle|metal ion binding
chr12	9646001	9647000	1	1	10	0	108	1	-0.93	0	0.93	VIT_212s0057g00950	VIT_212s0057g00950	352.073	580.536	123.61	0.212923	-2.23159	3.11047e-07	6.48241e-05	Down	21.9111	4.40815	LOC100854493		PREDICTED: uncharacterized protein LOC100854493 [Vitis vinifera]
chr12	9772001	9773000	0.199	0.635	667	7	242	0	1.05	1.05	0	VIT_212s0057g01100	VIT_212s0057g01100	2128.6	2869.67	1387.52	0.483511	-1.04838	6.25147e-05	0.00753609	Down	13.6655	6.83758	LOC100259630	NUDT2; Synonyms=NUDX2; At5g47650; MNJ7.24	PREDICTED: nudix hydrolase 2-like isoform X1 [Vitis vinifera]	GO:0000210,GO:0006979,GO:0046872,GO:0047631,GO:0051287	NAD+ diphosphatase activity|response to oxidative stress|metal ion binding|ADP-ribose diphosphatase activity|NAD binding
chr12	9775001	9776000	5.18e-16	1.78e-13	1913	196	611	8	8.94	10.25	1.31	VIT_212s0057g01100	VIT_212s0057g01100	2128.6	2869.67	1387.52	0.483511	-1.04838	6.25147e-05	0.00753609	Down	13.6655	6.83758	LOC100259630	NUDT2; Synonyms=NUDX2; At5g47650; MNJ7.24	PREDICTED: nudix hydrolase 2-like isoform X1 [Vitis vinifera]	GO:0000210,GO:0006979,GO:0046872,GO:0047631,GO:0051287	NAD+ diphosphatase activity|response to oxidative stress|metal ion binding|ADP-ribose diphosphatase activity|NAD binding
chr12	9782001	9783000	1	1	509	1	20	0	0.2	0.2	0	VIT_212s0057g01100	VIT_212s0057g01100	2128.6	2869.67	1387.52	0.483511	-1.04838	6.25147e-05	0.00753609	Down	13.6655	6.83758	LOC100259630	NUDT2; Synonyms=NUDX2; At5g47650; MNJ7.24	PREDICTED: nudix hydrolase 2-like isoform X1 [Vitis vinifera]	GO:0000210,GO:0006979,GO:0046872,GO:0047631,GO:0051287	NAD+ diphosphatase activity|response to oxidative stress|metal ion binding|ADP-ribose diphosphatase activity|NAD binding
chr12	9786001	9787000	1	1	85	0	953	1	-0.1	0	0.1	VIT_212s0057g01100	VIT_212s0057g01100	2128.6	2869.67	1387.52	0.483511	-1.04838	6.25147e-05	0.00753609	Down	13.6655	6.83758	LOC100259630	NUDT2; Synonyms=NUDX2; At5g47650; MNJ7.24	PREDICTED: nudix hydrolase 2-like isoform X1 [Vitis vinifera]	GO:0000210,GO:0006979,GO:0046872,GO:0047631,GO:0051287	NAD+ diphosphatase activity|response to oxidative stress|metal ion binding|ADP-ribose diphosphatase activity|NAD binding
chr12	9787001	9788000	0.182	0.606	696	4	845	1	0.46	0.57	0.12	VIT_212s0057g01100	VIT_212s0057g01100	2128.6	2869.67	1387.52	0.483511	-1.04838	6.25147e-05	0.00753609	Down	13.6655	6.83758	LOC100259630	NUDT2; Synonyms=NUDX2; At5g47650; MNJ7.24	PREDICTED: nudix hydrolase 2-like isoform X1 [Vitis vinifera]	GO:0000210,GO:0006979,GO:0046872,GO:0047631,GO:0051287	NAD+ diphosphatase activity|response to oxidative stress|metal ion binding|ADP-ribose diphosphatase activity|NAD binding
chr12	14338001	14339000	0.583	1	232	0	579	4	-0.69	0	0.69	VIT_212s0055g00920	VIT_212s0055g00920	47.1911	73.7805	20.6016	0.279229	-1.84048	0.0483166	1	Down	2.37238	0.610145	LOC100253830	ALD1; At2g13810; F13J11.16	PREDICTED: aminotransferase ALD1 [Vitis vinifera]	GO:0008483,GO:0009058,GO:0009507,GO:0009862,GO:0010150,GO:0030170,GO:0042742	transaminase activity|biosynthetic process|chloroplast|systemic acquired resistance, salicylic acid mediated signaling pathway|leaf senescence|pyridoxal phosphate binding|defense response to bacterium	path:vvi00300	Lysine biosynthesis
chr12	18112001	18113000	1	1	73	1	10	0	1.37	1.37	0	VIT_212s0034g01890	VIT_212s0034g01890	34.0668	65.0434	3.09025	0.0475105	-4.39561	0.000557896	0.0472586	Down	2.92273	0.118925	LOC100254961	GLUA3; Synonyms=GLUA-3, GT22, GT3; Os03g0427300, LOC_Os03g31360; OSJNBa0083F15.19	PREDICTED: glutelin type-A 3 [Vitis vinifera]	GO:0045735	nutrient reservoir activity
chr12	22312001	22313000	1	1	34	0	114	1	-0.88	0	0.88	VIT_212s0035g02000	VIT_212s0035g02000	16.9074	2.91239	30.9025	10.6107	3.40745	0.0295388	0.931453	Up	0.23742	1.42796	LOC100253899		PREDICTED: 14 kDa proline-rich protein DC2.15 [Vitis vinifera]	GO:0016021	integral component of membrane
chr12	22313001	22314000	1	1	517	9	30	0	1.74	1.74	0	VIT_212s0035g02000	VIT_212s0035g02000	16.9074	2.91239	30.9025	10.6107	3.40745	0.0295388	0.931453	Up	0.23742	1.42796	LOC100253899		PREDICTED: 14 kDa proline-rich protein DC2.15 [Vitis vinifera]	GO:0016021	integral component of membrane
chr12	22314001	22315000	1	1	209	3	53	0	1.44	1.44	0	VIT_212s0035g02000	VIT_212s0035g02000	16.9074	2.91239	30.9025	10.6107	3.40745	0.0295388	0.931453	Up	0.23742	1.42796	LOC100253899		PREDICTED: 14 kDa proline-rich protein DC2.15 [Vitis vinifera]	GO:0016021	integral component of membrane
chr12	22315001	22316000	0.0728	0.358	180	0	130	3	-2.31	0	2.31	VIT_212s0035g02000	VIT_212s0035g02000	16.9074	2.91239	30.9025	10.6107	3.40745	0.0295388	0.931453	Up	0.23742	1.42796	LOC100253899		PREDICTED: 14 kDa proline-rich protein DC2.15 [Vitis vinifera]	GO:0016021	integral component of membrane
chr13	526001	527000	1	1	566	2	50	0	0.35	0.35	0	VIT_213s0067g00930	VIT_213s0067g00930	289.909	406.764	173.054	0.42544	-1.23297	0.00628448	0.315886	Down	8.05752	2.96429	LOC100243297	CCR3; Synonyms=CRR3; At3g55950; F27K19.130	PREDICTED: putative serine/threonine-protein kinase-like protein CCR3 [Vitis vinifera]
chr13	606001	607000	0.165	0.574	167	5	91	0	2.99	2.99	0	VIT_213s0067g01070	VIT_213s0067g01070	2069.8	2788.13	1351.47	0.484722	-1.04477	7.09595e-05	0.00839116	Down	34.4927	15.5084	LOC100246707	At2g40140; T07M07.3, T7M7.3	PREDICTED: zinc finger CCCH domain-containing protein 29-like [Vitis vinifera]	GO:0003677,GO:0003700,GO:0005634,GO:0006355,GO:0009409,GO:0010200,GO:0046872,GO:0050832	DNA binding|DNA binding transcription factor activity|nucleus|regulation of transcription, DNA-templated|response to cold|response to chitin|metal ion binding|defense response to fungus
chr13	1153001	1154000	1	1	486	8	50	0	1.65	1.65	0	VIT_213s0067g02050	VIT_213s0067g02050	336.878	150.473	523.282	3.47757	1.79808	3.47257e-05	0.00454001	Up	3.88553	12.1584	LOC100263842		PREDICTED: uncharacterized protein LOC100263842 isoform X1 [Vitis vinifera]
chr13	1154001	1155000	1	1	60	0	242	1	-0.41	0	0.41	VIT_213s0067g02050	VIT_213s0067g02050	336.878	150.473	523.282	3.47757	1.79808	3.47257e-05	0.00454001	Up	3.88553	12.1584	LOC100263842		PREDICTED: uncharacterized protein LOC100263842 isoform X1 [Vitis vinifera]
chr13	1719001	1720000	1	1	306	2	10	0	0.65	0.65	0	VIT_213s0067g03140	VIT_213s0067g03140	189.302	328.129	50.474	0.153824	-2.70065	1.84719e-06	0.000313561	Down	7.86408	1.11252	LOC100258754	WRKY70; At3g56400; T5P19.50	PREDICTED: probable WRKY transcription factor 70 [Vitis vinifera]	GO:0003700,GO:0005634,GO:0006351,GO:0009751,GO:0009753,GO:0009862,GO:0009864,GO:0010200,GO:0031347,GO:0042742,GO:0043565,GO:0045892,GO:0050832,GO:1900056	DNA binding transcription factor activity|nucleus|transcription, DNA-templated|response to salicylic acid|response to jasmonic acid|systemic acquired resistance, salicylic acid mediated signaling pathway|induced systemic resistance, jasmonic acid mediated signaling pathway|response to chitin|regulation of defense response|defense response to bacterium|sequence-specific DNA binding|negative regula…
chr13	2501001	2502000	1	1	756	5	20	0	0.66	0.66	0	VIT_213s0019g00480	VIT_213s0019g00480	47.3208	86.4009	8.24066	0.095377	-3.39022	0.000904814	0.0713312	Down	3.46512	0.231633	LOC100242729	ZAT12; Synonyms=RHL41; At5g59820; MMN10.11	PREDICTED: zinc finger protein ZAT12 [Vitis vinifera]	GO:0003700,GO:0005634,GO:0006351,GO:0006979,GO:0009408,GO:0009409,GO:0009416,GO:0009611,GO:0009631,GO:0009643,GO:0010200,GO:0010224,GO:0042538,GO:0043565,GO:0046872	DNA binding transcription factor activity|nucleus|transcription, DNA-templated|response to oxidative stress|response to heat|response to cold|response to light stimulus|response to wounding|cold acclimation|photosynthetic acclimation|response to chitin|response to UV-B|hyperosmotic salinity response|sequence-specific DNA binding|metal ion binding
chr13	2906001	2907000	0.0271	0.19	184	5	317	1	2.4	2.72	0.32	VIT_213s0019g01291	VIT_213s0019g01291	30.7579	55.3354	6.18049	0.111691	-3.16241	0.00818857	0.374461	Down	1.14028	0	LOC104881138		PREDICTED: uncharacterized protein LOC104881138 [Vitis vinifera]
chr13	2927001	2928000	0.165	0.573	185	4	262	1	1.78	2.16	0.38	VIT_213s0019g01310	VIT_213s0019g01310	122.617	234.933	10.3008	0.0438458	-4.51142	3.95012e-09	1.24099e-06	Down	9.80254	0.335042	LOC104881137		PREDICTED: uncharacterized protein LOC104881137 [Vitis vinifera]
chr13	2977001	2978000	1	1	258	1	87	0	0.39	0.39	0	VIT_213s0019g01366	VIT_213s0019g01366	107.877	211.634	4.12033	0.0194692	-5.68267	2.41134e-10	9.2284e-08	Down	7.43304	0.135804	LOC104881135		PREDICTED: uncharacterized protein LOC104881135 isoform X1 [Vitis vinifera]
chr13	3044001	3045000	0.0857	0.395	10	0	32	9	-28.12	0	28.12	VIT_213s0019g01490	VIT_213s0019g01490	234.318	321.334	147.302	0.458407	-1.1253	0.0211298	0.757686	Down	7.71509	2.98006	LOC100259835	ERG1; Os01g0841700, LOC_Os01g62430; OsJ_04036 {ECO:0000312|EMBL:EEE55652.1}, P0406G08	PREDICTED: elicitor-responsive protein 1 [Vitis vinifera]	GO:0005544,GO:0005737,GO:0005886,GO:0006952	calcium-dependent phospholipid binding|cytoplasm|plasma membrane|defense response
chr13	3599001	3600000	1	1	88	3	20	0	3.41	3.41	0	VIT_213s0019g02350	VIT_213s0019g02350	289.898	390.26	189.535	0.485663	-1.04197	0.0203603	0.742479	Down	12.6038	5.84223	LOC100266772	At2g39795; T5I7.20	PREDICTED: uncharacterized protein At2g39795, mitochondrial [Vitis vinifera]	GO:0005739,GO:0005759	mitochondrion|mitochondrial matrix
chr13	4183001	4184000	0.106	0.447	550	7	248	0	1.27	1.27	0	VIT_213s0019g03060	VIT_213s0019g03060	56.9287	92.2257	21.6317	0.234552	-2.09202	0.0169021	0.641123	Down	2.47795	0.3094	LOC100251340	UGT709C2; Synonyms=UGT8	PREDICTED: 7-deoxyloganetic acid glucosyltransferase [Vitis vinifera]	GO:0035251,GO:0102970,GO:1900994	UDP-glucosyltransferase activity|7-deoxyloganetic acid glucosyltransferase activity|(-)-secologanin biosynthetic process
chr13	6560001	6561000	2.1e-11	3.98e-09	206	2	580	95	-15.41	0.97	16.38	VIT_213s0019g04880	VIT_213s0019g04880	28.7274	54.3646	3.09025	0.056843	-4.13687	0.00195994	0.132652	Down	1.32523	0.0742177	LOC100263249		unnamed protein product, partial [Vitis vinifera]
chr13	6563001	6564000	0.0297	0.202	10	0	92	31	-33.7	0	33.7	VIT_213s0019g04880	VIT_213s0019g04880	28.7274	54.3646	3.09025	0.056843	-4.13687	0.00195994	0.132652	Down	1.32523	0.0742177	LOC100263249		unnamed protein product, partial [Vitis vinifera]
chr13	7302001	7303000	0.598	1	70	0	400	6	-1.5	0	1.5	VIT_213s0019g05400	VIT_213s0019g05400	27.6973	54.3646	1.03008	0.0189477	-5.72184	0.000337571	0.0306273	Down	0.379296	0.00804866	LOC100254715		PREDICTED: myosin-9-like [Vitis vinifera]
chr13	7303001	7304000	0.159	0.563	380	0	72	1	-1.39	0	1.39	VIT_213s0019g05400	VIT_213s0019g05400	27.6973	54.3646	1.03008	0.0189477	-5.72184	0.000337571	0.0306273	Down	0.379296	0.00804866	LOC100254715		PREDICTED: myosin-9-like [Vitis vinifera]
chr13	7304001	7305000	0.611	1	587	10	70	0	1.7	1.7	0	VIT_213s0019g05400	VIT_213s0019g05400	27.6973	54.3646	1.03008	0.0189477	-5.72184	0.000337571	0.0306273	Down	0.379296	0.00804866	LOC100254715		PREDICTED: myosin-9-like [Vitis vinifera]
chr13	7306001	7307000	1	1	10	0	352	2	-0.57	0	0.57	VIT_213s0019g05400	VIT_213s0019g05400	27.6973	54.3646	1.03008	0.0189477	-5.72184	0.000337571	0.0306273	Down	0.379296	0.00804866	LOC100254715		PREDICTED: myosin-9-like [Vitis vinifera]
chr13	7308001	7309000	0.0325	0.214	345	5	770	2	1.19	1.45	0.26	VIT_213s0019g05400	VIT_213s0019g05400	27.6973	54.3646	1.03008	0.0189477	-5.72184	0.000337571	0.0306273	Down	0.379296	0.00804866	LOC100254715		PREDICTED: myosin-9-like [Vitis vinifera]
chr13	7486001	7487000	1	1	208	3	51	0	1.44	1.44	0	VIT_213s0074g00110	VIT_213s0074g00110	133.677	193.189	74.1659	0.383904	-1.38118	0.024183	0.829036	Down	8.05867	2.82049	LOC100259215	BSPA	PREDICTED: bark storage protein A [Vitis vinifera]	GO:0003824,GO:0009116,GO:0045735	catalytic activity|nucleoside metabolic process|nutrient reservoir activity
chr13	11118001	11119000	1	1	164	0	199	1	-0.5	0	0.5	VIT_213s0147g00100	VIT_213s0147g00100	7.28097	14.5619	0	0	#NAME?	0.0470467	1	Down	1.55475	0	LOC100244193	RPA3A; Synonyms=RAFA3A, RPA14A; At3g52630; F3C22.30	unnamed protein product, partial [Vitis vinifera]	GO:0003677,GO:0005634,GO:0006260,GO:0006281,GO:0006310	DNA binding|nucleus|DNA replication|DNA repair|DNA recombination	path:vvi03030,path:vvi03420,path:vvi03430,path:vvi03440	DNA replication|Nucleotide excision repair|Mismatch repair|Homologous recombination
chr13	18625001	18626000	1	1	251	1	20	0	0.4	0.4	0	VIT_213s0084g00080	VIT_213s0084g00080	52.5305	84.4593	20.6016	0.243924	-2.0355	0.0239162	0.825267	Down	1.07413	0.28774	LOC100267765	MAP65-5; At2g38720; T6A23.8	PREDICTED: 65-kDa microtubule-associated protein 5 isoform X1 [Vitis vinifera]	GO:0000226,GO:0000910,GO:0005634,GO:0005819,GO:0005874,GO:0005938,GO:0008017,GO:0009506,GO:0009524	microtubule cytoskeleton organization|cytokinesis|nucleus|spindle|microtubule|cell cortex|microtubule binding|plasmodesma|phragmoplast
chr13	18626001	18627000	0.505	0.992	90	2	70	0	2.22	2.22	0	VIT_213s0084g00080	VIT_213s0084g00080	52.5305	84.4593	20.6016	0.243924	-2.0355	0.0239162	0.825267	Down	1.07413	0.28774	LOC100267765	MAP65-5; At2g38720; T6A23.8	PREDICTED: 65-kDa microtubule-associated protein 5 isoform X1 [Vitis vinifera]	GO:0000226,GO:0000910,GO:0005634,GO:0005819,GO:0005874,GO:0005938,GO:0008017,GO:0009506,GO:0009524	microtubule cytoskeleton organization|cytokinesis|nucleus|spindle|microtubule|cell cortex|microtubule binding|plasmodesma|phragmoplast
chr13	18640001	18641000	6.82e-12	1.4e-09	245	41	286	3	15.69	16.73	1.05	VIT_213s0084g00080	VIT_213s0084g00080	52.5305	84.4593	20.6016	0.243924	-2.0355	0.0239162	0.825267	Down	1.07413	0.28774	LOC100267765	MAP65-5; At2g38720; T6A23.8	PREDICTED: 65-kDa microtubule-associated protein 5 isoform X1 [Vitis vinifera]	GO:0000226,GO:0000910,GO:0005634,GO:0005819,GO:0005874,GO:0005938,GO:0008017,GO:0009506,GO:0009524	microtubule cytoskeleton organization|cytokinesis|nucleus|spindle|microtubule|cell cortex|microtubule binding|plasmodesma|phragmoplast
chr13	24010001	24011000	1	1	155	1	30	0	0.65	0.65	0	VIT_213s0156g00240	VIT_213s0156g00240	49.3217	88.3425	10.3008	0.116601	-3.10035	0.00162476	0.115931	Down	3.8449	0.422094			hypothetical protein VITISV_033017 [Vitis vinifera]
chr13	24010001	24011000	1	1	155	1	30	0	0.65	0.65	0	VIT_213s0156g00245	VIT_213s0156g00245	28.8164	51.4522	6.18049	0.120121	-3.05744	0.012151	0.4976	Down	1.19927	0.1354	LOC100261320		PREDICTED: uncharacterized protein LOC100261320 [Vitis vinifera]
chr14	241001	242000	0.0215	0.163	347	0	217	4	-1.84	0	1.84	VIT_214s0060g00240	VIT_214s0060g00240	26.0892	5.82478	46.3537	7.95802	2.99241	0.0173515	0.654536	Up	0.104457	0.631115	LOC100240910		PREDICTED: transcription factor MYB86 [Vitis vinifera]	GO:0000981,GO:0001135,GO:0003700,GO:0005634,GO:0006351,GO:0006357,GO:0009733,GO:0010087,GO:0010089,GO:0010119,GO:0010214,GO:0030154,GO:0043565,GO:0044212,GO:0048364	RNA polymerase II transcription factor activity, sequence-specific DNA binding|transcription factor activity, RNA polymerase II transcription factor recruiting|DNA binding transcription factor activity|nucleus|transcription, DNA-templated|regulation of transcription from RNA polymerase II promoter|response to auxin|phloem or xylem histogenesis|xylem development|regulation of stomatal movement|see…
chr14	242001	243000	1	1	44	0	571	5	-0.88	0	0.88	VIT_214s0060g00240	VIT_214s0060g00240	26.0892	5.82478	46.3537	7.95802	2.99241	0.0173515	0.654536	Up	0.104457	0.631115	LOC100240910		PREDICTED: transcription factor MYB86 [Vitis vinifera]	GO:0000981,GO:0001135,GO:0003700,GO:0005634,GO:0006351,GO:0006357,GO:0009733,GO:0010087,GO:0010089,GO:0010119,GO:0010214,GO:0030154,GO:0043565,GO:0044212,GO:0048364	RNA polymerase II transcription factor activity, sequence-specific DNA binding|transcription factor activity, RNA polymerase II transcription factor recruiting|DNA binding transcription factor activity|nucleus|transcription, DNA-templated|regulation of transcription from RNA polymerase II promoter|response to auxin|phloem or xylem histogenesis|xylem development|regulation of stomatal movement|see…
chr14	243001	244000	0.315	0.8	306	4	138	0	1.31	1.31	0	VIT_214s0060g00240	VIT_214s0060g00240	26.0892	5.82478	46.3537	7.95802	2.99241	0.0173515	0.654536	Up	0.104457	0.631115	LOC100240910		PREDICTED: transcription factor MYB86 [Vitis vinifera]	GO:0000981,GO:0001135,GO:0003700,GO:0005634,GO:0006351,GO:0006357,GO:0009733,GO:0010087,GO:0010089,GO:0010119,GO:0010214,GO:0030154,GO:0043565,GO:0044212,GO:0048364	RNA polymerase II transcription factor activity, sequence-specific DNA binding|transcription factor activity, RNA polymerase II transcription factor recruiting|DNA binding transcription factor activity|nucleus|transcription, DNA-templated|regulation of transcription from RNA polymerase II promoter|response to auxin|phloem or xylem histogenesis|xylem development|regulation of stomatal movement|see…
chr14	624001	625000	1	1	119	1	72	0	0.84	0.84	0	VIT_214s0060g00760	VIT_214s0060g00760	125.277	181.539	69.0155	0.380169	-1.39529	0.0264967	0.875554	Down	4.64329	1.3899	LOC100257918	GOLS2	PREDICTED: galactinol synthase 2 [Vitis vinifera]	GO:0005737,GO:0006012,GO:0046872,GO:0047216	cytoplasm|galactose metabolic process|metal ion binding|inositol 3-alpha-galactosyltransferase activity	path:vvi00052	Galactose metabolism
chr14	941001	942000	0.325	0.813	40	1	83	0	2.5	2.5	0	VIT_214s0060g01190	VIT_214s0060g01190	293.814	177.656	409.973	2.30768	1.20644	0.00710844	0.339178	Up	6.30449	13.5058	LOC100254544	CHLN; Synonyms=CLN	PREDICTED: nicotianamine synthase [Vitis vinifera]	GO:0030410,GO:0030418	nicotianamine synthase activity|nicotianamine biosynthetic process
chr14	942001	943000	0.499	0.99	201	0	209	2	-0.96	0	0.96	VIT_214s0060g01190	VIT_214s0060g01190	293.814	177.656	409.973	2.30768	1.20644	0.00710844	0.339178	Up	6.30449	13.5058	LOC100254544	CHLN; Synonyms=CLN	PREDICTED: nicotianamine synthase [Vitis vinifera]	GO:0030410,GO:0030418	nicotianamine synthase activity|nicotianamine biosynthetic process
chr14	944001	945000	0.00286	0.039	702	14	815	3	1.63	1.99	0.37	VIT_214s0060g01190	VIT_214s0060g01190	293.814	177.656	409.973	2.30768	1.20644	0.00710844	0.339178	Up	6.30449	13.5058	LOC100254544	CHLN; Synonyms=CLN	PREDICTED: nicotianamine synthase [Vitis vinifera]	GO:0030410,GO:0030418	nicotianamine synthase activity|nicotianamine biosynthetic process
chr14	1160001	1161000	1	1	61	0	80	1	-1.25	0	1.25	VIT_214s0060g01470	VIT_214s0060g01470	269.544	398.997	140.091	0.351108	-1.51001	0.00124131	0.0913577	Down	4.89742	1.40339	LOC104881366	CBP60B {ECO:0000303|PubMed:11782485}; At5g57580 {ECO:0000312|Araport:AT5G57580}; MUA2.16 {ECO:0000312|EMBL:BAB08793.1}	unnamed protein product, partial [Vitis vinifera]	GO:0003677,GO:0005516,GO:0005634,GO:0006351,GO:0006355,GO:0006950	DNA binding|calmodulin binding|nucleus|transcription, DNA-templated|regulation of transcription, DNA-templated|response to stress
chr14	1162001	1163000	0.00354	0.0456	308	0	20	2	-10	0	10	VIT_214s0060g01470	VIT_214s0060g01470	269.544	398.997	140.091	0.351108	-1.51001	0.00124131	0.0913577	Down	4.89742	1.40339	LOC104881366	CBP60B {ECO:0000303|PubMed:11782485}; At5g57580 {ECO:0000312|Araport:AT5G57580}; MUA2.16 {ECO:0000312|EMBL:BAB08793.1}	unnamed protein product, partial [Vitis vinifera]	GO:0003677,GO:0005516,GO:0005634,GO:0006351,GO:0006355,GO:0006950	DNA binding|calmodulin binding|nucleus|transcription, DNA-templated|regulation of transcription, DNA-templated|response to stress
chr14	1164001	1165000	0.548	1	30	0	60	3	-5	0	5	VIT_214s0060g01470	VIT_214s0060g01470	269.544	398.997	140.091	0.351108	-1.51001	0.00124131	0.0913577	Down	4.89742	1.40339	LOC104881366	CBP60B {ECO:0000303|PubMed:11782485}; At5g57580 {ECO:0000312|Araport:AT5G57580}; MUA2.16 {ECO:0000312|EMBL:BAB08793.1}	unnamed protein product, partial [Vitis vinifera]	GO:0003677,GO:0005516,GO:0005634,GO:0006351,GO:0006355,GO:0006950	DNA binding|calmodulin binding|nucleus|transcription, DNA-templated|regulation of transcription, DNA-templated|response to stress
chr14	2508001	2509000	0.0174	0.141	295	5	591	1	1.53	1.69	0.17	VIT_214s0060g02730	VIT_214s0060g02730	93.4114	10.6788	176.144	16.4948	4.04394	7.63011e-07	0.000143398	Up	0.605627	11.1613	GER5	GLP5A; Synonyms=GER2, GERM2, GLP2A, GLP2B; At5g39190; K3K3.6	germin-like protein 5 [Vitis vinifera]	GO:0005618,GO:0030145,GO:0031012,GO:0045735,GO:0048046	cell wall|manganese ion binding|extracellular matrix|nutrient reservoir activity|apoplast
chr14	3162001	3163000	0.456	0.948	340	1	406	0	0.29	0.29	0	VIT_214s0128g00570	VIT_214s0128g00570	1475.36	2622.12	328.596	0.125317	-2.99635	2.15828e-23	4.54296e-20	Down	131.24	15.9642	GER7	At5g39120; MXF12.12, MXF12_130	unnamed protein product, partial [Vitis vinifera]	GO:0005618,GO:0030145,GO:0045735,GO:0048046	cell wall|manganese ion binding|nutrient reservoir activity|apoplast
chr14	4813001	4814000	0.203	0.642	235	0	60	1	-1.67	0	1.67	VIT_214s0030g00670	VIT_214s0030g00670	81.9804	132.028	31.9325	0.241861	-2.04775	0.00698865	0.336623	Down	0.843231	0.0797798	LOC100253776	EMB3004; At3g06350; F24P17.18	hypothetical protein VITISV_034026 [Vitis vinifera]	GO:0003855,GO:0004764,GO:0009073,GO:0009423,GO:0009507,GO:0009570,GO:0009793,GO:0019632,GO:0050661	3-dehydroquinate dehydratase activity|shikimate 3-dehydrogenase (NADP+) activity|aromatic amino acid family biosynthetic process|chorismate biosynthetic process|chloroplast|chloroplast stroma|embryo development ending in seed dormancy|shikimate metabolic process|NADP binding	path:vvi00400	Phenylalanine, tyrosine and tryptophan biosynthesis
chr14	4815001	4816000	0.222	0.672	200	0	179	2	-1.12	0	1.12	VIT_214s0030g00670	VIT_214s0030g00670	81.9804	132.028	31.9325	0.241861	-2.04775	0.00698865	0.336623	Down	0.843231	0.0797798	LOC100253776	EMB3004; At3g06350; F24P17.18	hypothetical protein VITISV_034026 [Vitis vinifera]	GO:0003855,GO:0004764,GO:0009073,GO:0009423,GO:0009507,GO:0009570,GO:0009793,GO:0019632,GO:0050661	3-dehydroquinate dehydratase activity|shikimate 3-dehydrogenase (NADP+) activity|aromatic amino acid family biosynthetic process|chorismate biosynthetic process|chloroplast|chloroplast stroma|embryo development ending in seed dormancy|shikimate metabolic process|NADP binding	path:vvi00400	Phenylalanine, tyrosine and tryptophan biosynthesis
chr14	4820001	4821000	0.594	1	162	5	50	0	3.09	3.09	0	VIT_214s0030g00670	VIT_214s0030g00670	81.9804	132.028	31.9325	0.241861	-2.04775	0.00698865	0.336623	Down	0.843231	0.0797798	LOC100253776	EMB3004; At3g06350; F24P17.18	hypothetical protein VITISV_034026 [Vitis vinifera]	GO:0003855,GO:0004764,GO:0009073,GO:0009423,GO:0009507,GO:0009570,GO:0009793,GO:0019632,GO:0050661	3-dehydroquinate dehydratase activity|shikimate 3-dehydrogenase (NADP+) activity|aromatic amino acid family biosynthetic process|chorismate biosynthetic process|chloroplast|chloroplast stroma|embryo development ending in seed dormancy|shikimate metabolic process|NADP binding	path:vvi00400	Phenylalanine, tyrosine and tryptophan biosynthesis
chr14	6582001	6583000	1	1	301	1	169	0	0.33	0.33	0	VIT_214s0030g01700	VIT_214s0030g01700	14.0766	28.1531	0	0	#NAME?	0.0042396	0.233357	Down	0.888481	0	LOC104881414		PREDICTED: uncharacterized protein LOC104881414 [Vitis vinifera]
chr14	6584001	6585000	1	1	50	0	586	4	-0.68	0	0.68	VIT_214s0030g01700	VIT_214s0030g01700	14.0766	28.1531	0	0	#NAME?	0.0042396	0.233357	Down	0.888481	0	LOC104881414		PREDICTED: uncharacterized protein LOC104881414 [Vitis vinifera]
chr14	6586001	6587000	1	1	60	0	511	2	-0.39	0	0.39	VIT_214s0030g01700	VIT_214s0030g01700	14.0766	28.1531	0	0	#NAME?	0.0042396	0.233357	Down	0.888481	0	LOC104881414		PREDICTED: uncharacterized protein LOC104881414 [Vitis vinifera]
chr14	20413001	20414000	1	1	80	0	479	2	-0.42	0	0.42	VIT_214s0006g02590	VIT_214s0006g02590	7.72561	0	15.4512	Inf	Inf	0.0365806	1	Up	0	0.351638	LOC100253189	ntpR; EHR_08225	PREDICTED: uncharacterized protein LOC100253189 [Vitis vinifera]	GO:0006541,GO:0016787	glutamine metabolic process|hydrolase activity
chr14	25011001	25012000	1	1	10	0	130	1	-0.77	0	0.77	VIT_214s0068g01250	VIT_214s0068g01250	27.3009	50.4814	4.12033	0.0816207	-3.61492	0.00554501	0.28748	Down	4.91949	0.614015	LOC100253246	MPT3; Synonyms=AT5, PHT3;1; At5g14040; MUA22_4	PREDICTED: mitochondrial phosphate carrier protein 3, mitochondrial isoform X2 [Vitis vinifera]	GO:0005618,GO:0005739,GO:0005743,GO:0005774,GO:0006839,GO:0009507,GO:0009651,GO:0015114,GO:0016020,GO:0016021	cell wall|mitochondrion|mitochondrial inner membrane|vacuolar membrane|mitochondrial transport|chloroplast|response to salt stress|phosphate ion transmembrane transporter activity|membrane|integral component of membrane
chr14	25012001	25013000	1	1	52	1	20	0	1.92	1.92	0	VIT_214s0068g01250	VIT_214s0068g01250	27.3009	50.4814	4.12033	0.0816207	-3.61492	0.00554501	0.28748	Down	4.91949	0.614015	LOC100253246	MPT3; Synonyms=AT5, PHT3;1; At5g14040; MUA22_4	PREDICTED: mitochondrial phosphate carrier protein 3, mitochondrial isoform X2 [Vitis vinifera]	GO:0005618,GO:0005739,GO:0005743,GO:0005774,GO:0006839,GO:0009507,GO:0009651,GO:0015114,GO:0016020,GO:0016021	cell wall|mitochondrion|mitochondrial inner membrane|vacuolar membrane|mitochondrial transport|chloroplast|response to salt stress|phosphate ion transmembrane transporter activity|membrane|integral component of membrane
chr14	25013001	25014000	0.336	0.823	235	0	119	1	-0.84	0	0.84	VIT_214s0068g01250	VIT_214s0068g01250	27.3009	50.4814	4.12033	0.0816207	-3.61492	0.00554501	0.28748	Down	4.91949	0.614015	LOC100253246	MPT3; Synonyms=AT5, PHT3;1; At5g14040; MUA22_4	PREDICTED: mitochondrial phosphate carrier protein 3, mitochondrial isoform X2 [Vitis vinifera]	GO:0005618,GO:0005739,GO:0005743,GO:0005774,GO:0006839,GO:0009507,GO:0009651,GO:0015114,GO:0016020,GO:0016021	cell wall|mitochondrion|mitochondrial inner membrane|vacuolar membrane|mitochondrial transport|chloroplast|response to salt stress|phosphate ion transmembrane transporter activity|membrane|integral component of membrane
chr14	25014001	25015000	0.00277	0.0381	166	12	274	4	5.77	7.23	1.46	VIT_214s0068g01250	VIT_214s0068g01250	27.3009	50.4814	4.12033	0.0816207	-3.61492	0.00554501	0.28748	Down	4.91949	0.614015	LOC100253246	MPT3; Synonyms=AT5, PHT3;1; At5g14040; MUA22_4	PREDICTED: mitochondrial phosphate carrier protein 3, mitochondrial isoform X2 [Vitis vinifera]	GO:0005618,GO:0005739,GO:0005743,GO:0005774,GO:0006839,GO:0009507,GO:0009651,GO:0015114,GO:0016020,GO:0016021	cell wall|mitochondrion|mitochondrial inner membrane|vacuolar membrane|mitochondrial transport|chloroplast|response to salt stress|phosphate ion transmembrane transporter activity|membrane|integral component of membrane
chr14	25742001	25743000	1	1	72	4	10	0	5.56	5.56	0	VIT_214s0068g02150	VIT_214s0068g02150	419.755	624.222	215.287	0.344889	-1.5358	0.000116503	0.0132555	Down	10.3062	3.57659	LOC100267013	At3g27150; MYF5.2	hypothetical protein VITISV_041987 [Vitis vinifera]	GO:0005634,GO:0005737,GO:0019005,GO:0030162,GO:0031625,GO:0042787,GO:0043161	nucleus|cytoplasm|SCF ubiquitin ligase complex|regulation of proteolysis|ubiquitin protein ligase binding|protein ubiquitination involved in ubiquitin-dependent protein catabolic process|proteasome-mediated ubiquitin-dependent protein catabolic process
chr14	26024001	26025000	1	1	161	0	426	2	-0.47	0	0.47	VIT_214s0171g00170	VIT_214s0171g00170	30.8172	53.3938	8.24066	0.154337	-2.69584	0.0197748	0.726421	Down	0.457806	0.0541562	LOC100266440		PREDICTED: uncharacterized protein LOC100266440 [Vitis vinifera]
chr14	26059001	26060000	0.454	0.946	166	0	138	1	-0.72	0	0.72	VIT_214s0171g00210	VIT_214s0171g00210	9.78578	0	19.5716	Inf	Inf	0.0169165	0.641123	Up	0	0.274851	LOC100267874	KEG; At5g13530; T6I14.60, T6I14.70	unnamed protein product, partial [Vitis vinifera]	GO:0004672,GO:0004674,GO:0004842,GO:0005524,GO:0005769,GO:0005802,GO:0006952,GO:0009737,GO:0009738,GO:0009788,GO:0016197,GO:0016567,GO:0032940,GO:0043621,GO:0045324,GO:0046872,GO:0048589	protein kinase activity|protein serine/threonine kinase activity|ubiquitin-protein transferase activity|ATP binding|early endosome|trans-Golgi network|defense response|response to abscisic acid|abscisic acid-activated signaling pathway|negative regulation of abscisic acid-activated signaling pathway|endosomal transport|protein ubiquitination|secretion by cell|protein self-association|late endosom…
chr14	26212001	26213000	1	1	43	0	607	5	-0.82	0	0.82	VIT_214s0171g00400	VIT_214s0171g00400	1544.24	2238.66	849.818	0.37961	-1.39741	5.42811e-07	0.000106782	Down	43.2111	15.3359	LOC100262761	LHT1; At5g40780; K1B16.3	PREDICTED: lysine histidine transporter 1 [Vitis vinifera]	GO:0005886,GO:0015171,GO:0015293,GO:0016021,GO:0043090,GO:0080167	plasma membrane|amino acid transmembrane transporter activity|symporter activity|integral component of membrane|amino acid import|response to karrikin
chr14	26214001	26215000	1	1	53	0	226	1	-0.44	0	0.44	VIT_214s0171g00400	VIT_214s0171g00400	1544.24	2238.66	849.818	0.37961	-1.39741	5.42811e-07	0.000106782	Down	43.2111	15.3359	LOC100262761	LHT1; At5g40780; K1B16.3	PREDICTED: lysine histidine transporter 1 [Vitis vinifera]	GO:0005886,GO:0015171,GO:0015293,GO:0016021,GO:0043090,GO:0080167	plasma membrane|amino acid transmembrane transporter activity|symporter activity|integral component of membrane|amino acid import|response to karrikin
chr14	28045001	28046000	0.0102	0.0974	30	2	1457	6	6.25	6.67	0.41	VIT_214s0066g01710	VIT_214s0066g01710	169.378	255.32	83.4366	0.326793	-1.61355	0.00410439	0.228554	Down	5.55919	1.52679	LOC100257711	AXY4L; Synonyms=TBL22; At3g28150; MMG15.18	PREDICTED: protein ALTERED XYLOGLUCAN 4-like [Vitis vinifera]	GO:0005794,GO:0010411,GO:0016021,GO:0016413	Golgi apparatus|xyloglucan metabolic process|integral component of membrane|O-acetyltransferase activity
chr14	28046001	28047000	1	1	42	0	645	9	-1.4	0	1.4	VIT_214s0066g01710	VIT_214s0066g01710	169.378	255.32	83.4366	0.326793	-1.61355	0.00410439	0.228554	Down	5.55919	1.52679	LOC100257711	AXY4L; Synonyms=TBL22; At3g28150; MMG15.18	PREDICTED: protein ALTERED XYLOGLUCAN 4-like [Vitis vinifera]	GO:0005794,GO:0010411,GO:0016021,GO:0016413	Golgi apparatus|xyloglucan metabolic process|integral component of membrane|O-acetyltransferase activity
chr14	28048001	28049000	0.15	0.544	299	2	923	1	0.56	0.67	0.11	VIT_214s0066g01710	VIT_214s0066g01710	169.378	255.32	83.4366	0.326793	-1.61355	0.00410439	0.228554	Down	5.55919	1.52679	LOC100257711	AXY4L; Synonyms=TBL22; At3g28150; MMG15.18	PREDICTED: protein ALTERED XYLOGLUCAN 4-like [Vitis vinifera]	GO:0005794,GO:0010411,GO:0016021,GO:0016413	Golgi apparatus|xyloglucan metabolic process|integral component of membrane|O-acetyltransferase activity
chr14	28049001	28050000	0.0713	0.354	339	0	124	2	-1.61	0	1.61	VIT_214s0066g01710	VIT_214s0066g01710	169.378	255.32	83.4366	0.326793	-1.61355	0.00410439	0.228554	Down	5.55919	1.52679	LOC100257711	AXY4L; Synonyms=TBL22; At3g28150; MMG15.18	PREDICTED: protein ALTERED XYLOGLUCAN 4-like [Vitis vinifera]	GO:0005794,GO:0010411,GO:0016021,GO:0016413	Golgi apparatus|xyloglucan metabolic process|integral component of membrane|O-acetyltransferase activity
chr14	28050001	28051000	1	1	10	0	192	3	-1.56	0	1.56	VIT_214s0066g01710	VIT_214s0066g01710	169.378	255.32	83.4366	0.326793	-1.61355	0.00410439	0.228554	Down	5.55919	1.52679	LOC100257711	AXY4L; Synonyms=TBL22; At3g28150; MMG15.18	PREDICTED: protein ALTERED XYLOGLUCAN 4-like [Vitis vinifera]	GO:0005794,GO:0010411,GO:0016021,GO:0016413	Golgi apparatus|xyloglucan metabolic process|integral component of membrane|O-acetyltransferase activity
chr14	28138001	28139000	0.279	0.755	93	1	240	0	1.08	1.08	0	VIT_214s0066g01810	VIT_214s0066g01810	547.451	844.593	250.31	0.296367	-1.75454	1.88305e-06	0.00031709	Down	6.73415	1.95975	LOC100249226	SAG101; At5g14930; F2G14.50	PREDICTED: senescence-associated carboxylesterase 101-like [Vitis vinifera]	GO:0002230,GO:0005634,GO:0005737,GO:0006952,GO:0007568,GO:0016021,GO:0016042,GO:0052689,GO:1900057,GO:1900426,GO:1902290	positive regulation of defense response to virus by host|nucleus|cytoplasm|defense response|aging|integral component of membrane|lipid catabolic process|carboxylic ester hydrolase activity|positive regulation of leaf senescence|positive regulation of defense response to bacterium|positive regulation of defense response to oomycetes
chr14	28138001	28139000	0.279	0.755	93	1	240	0	1.08	1.08	0	VIT_214s0066g01820	VIT_214s0066g01820	1216.67	1918.29	515.041	0.268489	-1.89706	1.90261e-10	7.70155e-08	Down	40.1478	10.7784	LOC100244055	SAG101; At5g14930; F2G14.50	PREDICTED: senescence-associated carboxylesterase 101-like [Vitis vinifera]	GO:0002230,GO:0005634,GO:0005737,GO:0006952,GO:0007568,GO:0016021,GO:0016042,GO:0052689,GO:1900057,GO:1900426,GO:1902290	positive regulation of defense response to virus by host|nucleus|cytoplasm|defense response|aging|integral component of membrane|lipid catabolic process|carboxylic ester hydrolase activity|positive regulation of leaf senescence|positive regulation of defense response to bacterium|positive regulation of defense response to oomycetes
chr14	28139001	28140000	1	1	61	0	285	3	-1.05	0	1.05	VIT_214s0066g01820	VIT_214s0066g01820	1216.67	1918.29	515.041	0.268489	-1.89706	1.90261e-10	7.70155e-08	Down	40.1478	10.7784	LOC100244055	SAG101; At5g14930; F2G14.50	PREDICTED: senescence-associated carboxylesterase 101-like [Vitis vinifera]	GO:0002230,GO:0005634,GO:0005737,GO:0006952,GO:0007568,GO:0016021,GO:0016042,GO:0052689,GO:1900057,GO:1900426,GO:1902290	positive regulation of defense response to virus by host|nucleus|cytoplasm|defense response|aging|integral component of membrane|lipid catabolic process|carboxylic ester hydrolase activity|positive regulation of leaf senescence|positive regulation of defense response to bacterium|positive regulation of defense response to oomycetes
[truncated: 601 more rows]
