# Supplementary material for: Melatonin may increase disease resistance and flavonoid biosynthesis through effects on DNA methylation and gene expression in grape berries
Source: BMC Plant Biol. 2020 May 24;20:231. doi: 10.1186/s12870-020-02445-w (PMC7247213; doi:10.1186/s12870-020-02445-w)
Supplement: Supplementary file 6 — Additional file 6 Table S6 Alternative splicing frequency statistics for the control and melatonin-treated berries. [file 12870_2020_2445_MOESM6_ESM.xls]

## Sheet: Table S6
Table S6 Alternative splicing frequency statistics for the control and melatonin-treated berries
Type	Annotation	Melatonin	Control
IR	Intron retention	2133	1927
XIR	Approximate IR	434	433
MIR	Mulit-IR	109	90
XMIR	Approximate Mulit-IR	34	30
TTS	Alternative last exons	18495	17976
TSS	Alternative first exons	19409	19010
SKIP	Skipped exons	1840	1571
XSKIP	Approximate SKIP	732	725
MSKIP	Mulit-exon SKIP	252	192
AE	Alternative exon ends	3032	2973
XAE	Approximate AE	675	535
