# Supplementary material for: Melatonin may increase disease resistance and flavonoid biosynthesis through effects on DNA methylation and gene expression in grape berries
Source: BMC Plant Biol. 2020 May 24;20:231. doi: 10.1186/s12870-020-02445-w (PMC7247213; doi:10.1186/s12870-020-02445-w)
Supplement: Supplementary file 7 — Additional file 7 Table S7 Primers used in this study. [file 12870_2020_2445_MOESM7_ESM.xls]

## Sheet: Table S7
Table S7 Primers used in this study
Gene ID	Forward primer (5'-3')	Reverse primer (5'-3')	Product size (bp)	Notes
VIT_216s0100g01100 STS1	TATTAATAAGAAGAAAGTTGGTGGTAG	AACCCTAATCCATTAACAATCAATAA	383	BS-PCR
	GGGGAATGGTACCTTTGATG	CTGTTTAAATTGAGCTCATGAAG	161	qRT-PCR
VIT_217s0000g07370 EDS1	AAGGAAAGGTGGTATTATAGTTAAG	AAAAAACCCATTTTTAAACCC	155	BS-PCR
	GGTTTCATGCTGTTATCTCG	TTTCAGTTATCAAGAGAGCAGTC	90	qRT-PCR
VIT_218s0001g11830 CML41	TTTTTTGGAAATAAAGTAGGAAA	ATCAATTTCTCAAATCACTACAACT	291	BS-PCR
	CTTGACTCTCTTGATGTGTGG	ACTGGGTTTCATCTGATCTCT	89	qRT-PCR
VIT_217s0000g07370 EDS1	GGATGTTATGTTTCAACCAAGG	CTCCCATATTCTCTCTATGCAA	800	Amplifying the promoter of EPS1
VIT_212s0035g01770 MET1	ATGGACACTGATGAAGCAGC	TCAGTCCGACTGTGTTGAATG	1383	Amplifying the ORF of DMT1B
	CTCAAGGAAGCTGTAGAAAGG	GCTACTAGATCGCATCATGATAT	148	qRT-PCR
VIT_212s0035g01755 MET1B	CGGACTGAATCACATGTACC	GATAGATGACAGTGTGTTCCTTT	183	qRT-PCR
VIT_214s0006g02170 SadMET	TCGAGTTGAGCCACCATG	GAGCACTCCACTGTTACAGATG	188	qRT-PCR
VIT_216s0039g02470 CMT2_1	GTCAATTCCATTCTCTTTCTGAG	CTTCTTCAGAGATTATGGGAG	104	qRT-PCR
VIT_216s0039g02460 CMT2_2	CATGTACTACGCTAGGAACCTGG	GTGAAGGATTATGACAGGGAGA	140	qRT-PCR
VIT_216s0039g01320 PAL1	AGCAAGTTAGGTGAAAGTCACTC	CAATACTGTGGTAACACCTGTTG	123	qRT-PCR
